# Supplementary material for: Polyunsaturated sulfur/selenium-containing products based on regio- and stereoselective nucleophilic addition and substitution reactions of 1,2-bis[(Z)-2-(vinylsulfanyl)ethenyl] diselane
Source: Royal Society of Chemistry journal article supplement (doi:10.1039/d3nj01147j), 2023-01-01
Supplement: d3nj01147j1.pdf [file d3nj01147j1.pdf]

## Electronic supplementary information

### Polyunsaturated sulfur/selenium-containing products based on regio- and stereoselective nucleophilic addition and substitution reactions of 1,2-bis[(Z)-2-(vinylsulfanyl)ethenyl] diselanet†

Svetlana V. Amosova,\* Andrey S. Filippov, Nataliya A. Makhaeva, Alexander I. Albanov and Vladimir A. Potapov

#### Table of Contents

|                                                                                                                  |       |
|------------------------------------------------------------------------------------------------------------------|-------|
| <sup>1</sup> H, <sup>13</sup> C and <sup>77</sup> Se NMR spectra of 2-(bromomethyl)-1,3-thiaselenole             | 2–4   |
| <sup>1</sup> H, <sup>13</sup> C and <sup>77</sup> Se NMR spectra of compound <b>1</b>                            | 5–7   |
| <sup>1</sup> H, <sup>13</sup> C, <sup>77</sup> Se, <sup>19</sup> F NMR and mass-spectra of compounds <b>2a–j</b> | 8–48  |
| <sup>1</sup> H, <sup>13</sup> C and <sup>77</sup> Se NMR spectra of compounds <b>3a,b</b>                        | 49–54 |
| <sup>1</sup> H, <sup>13</sup> C and <sup>77</sup> Se NMR and mass-spectra of compounds <b>4a–c</b>               | 55–66 |
| <sup>1</sup> H, <sup>13</sup> C and <sup>77</sup> Se NMR and mass-spectra of compounds <b>5a–c</b>               | 67–78 |
| <sup>1</sup> H, <sup>13</sup> C and <sup>77</sup> Se NMR and mass-spectra of compounds <b>6a,b</b>               | 79–86 |

<sup>1</sup>H

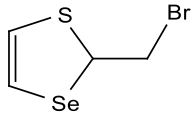

— 7.27

6.64  
6.62  
6.42  
6.40

5.09  
5.07  
5.05

3.66  
3.64  
3.62  
3.59  
3.58

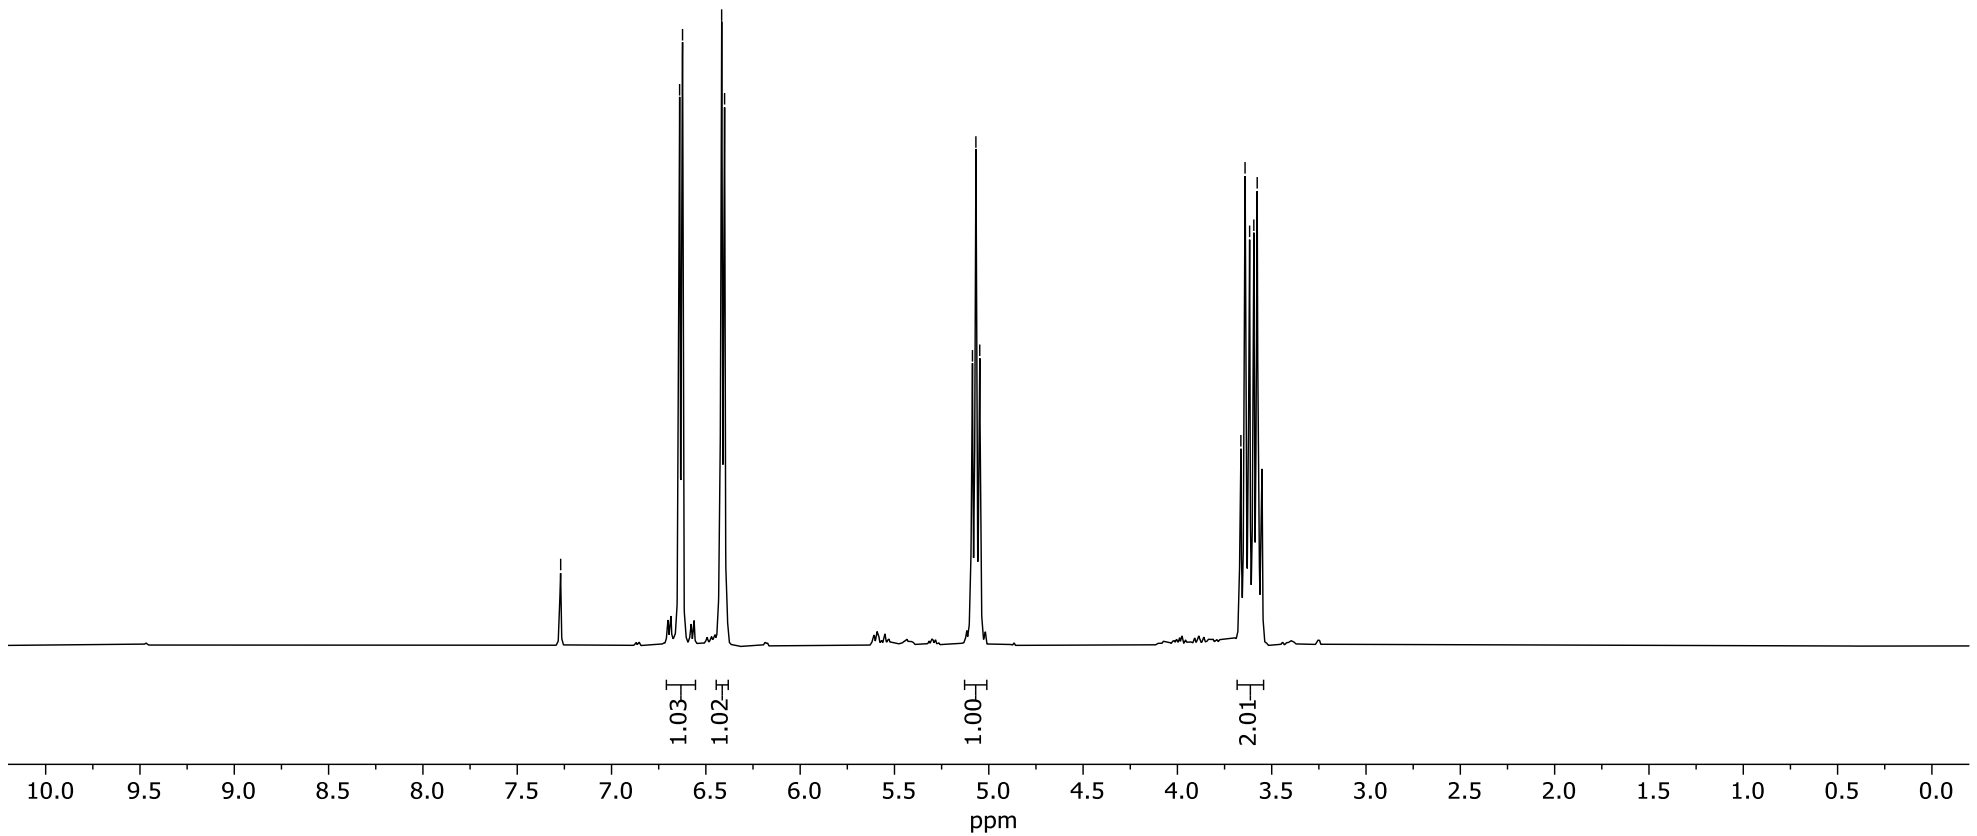

<sup>1</sup>H NMR spectrum of 2-(bromomethyl)-1,3-thiaselenole

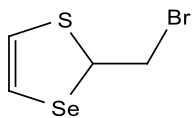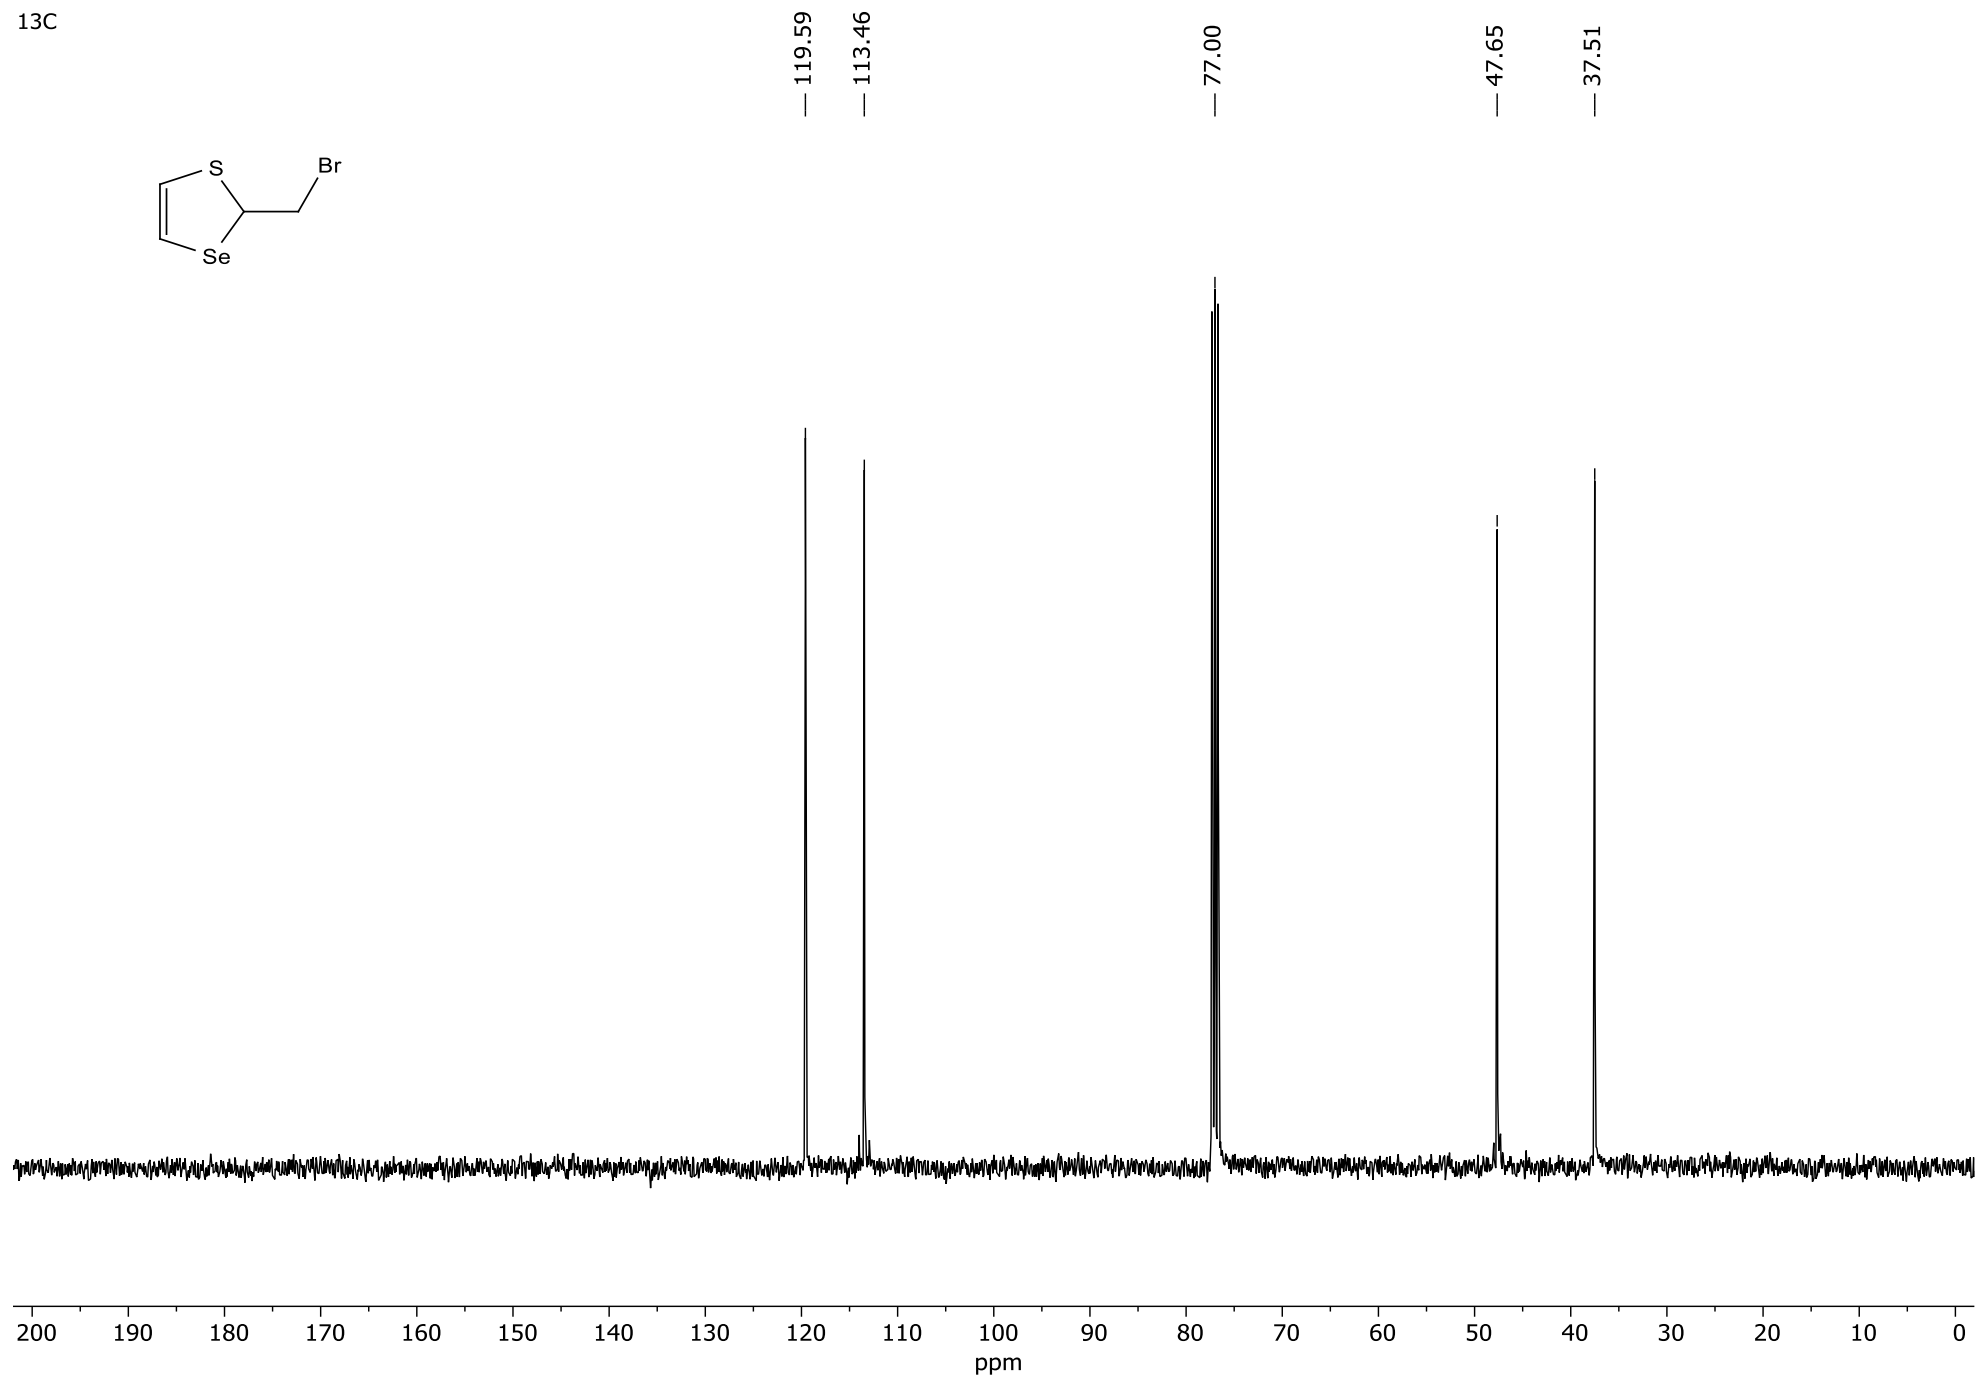

**<sup>13</sup>C NMR spectrum of 2-(bromomethyl)-1,3-thiaselenole**

$^{77}\text{Se}$

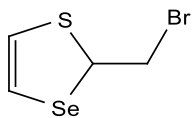

— 522.26

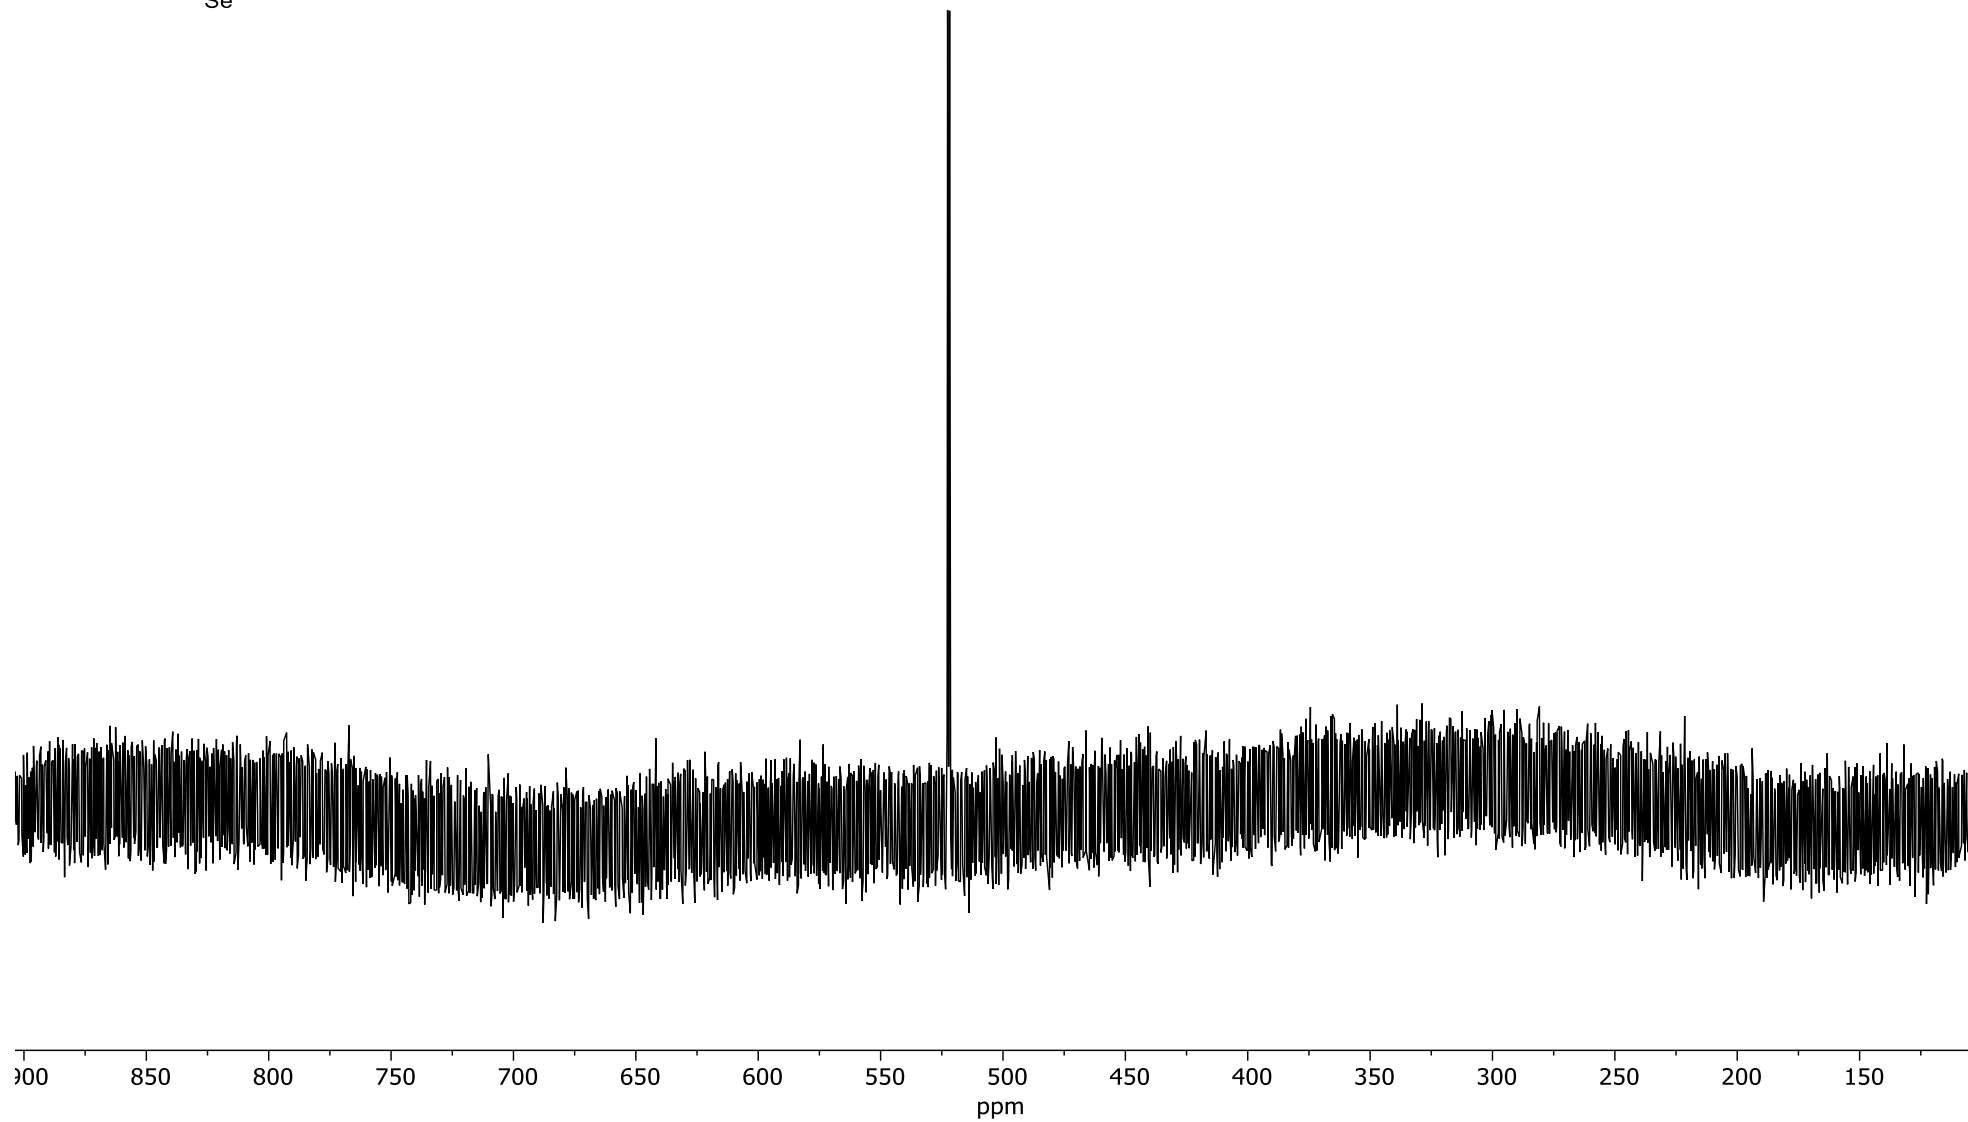

$^{77}\text{Se}$  NMR spectrum of 2-(bromomethyl)-1,3-thiaselenole

<sup>1</sup>H

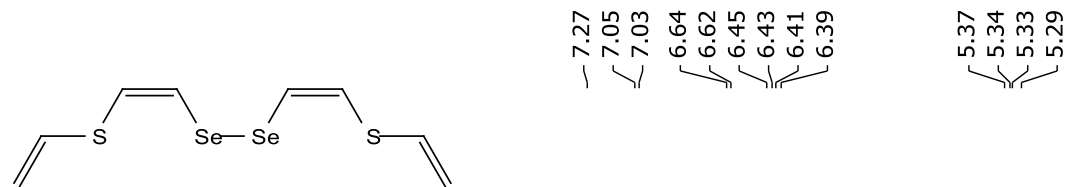

7.04 (d, 1H, SCH=CHSe, <sup>3</sup>J = 7.9 Hz)      6.63 (d, 1H, SCH=CHSe, <sup>3</sup>J = 7.9 Hz)

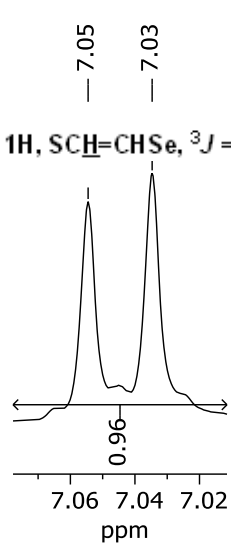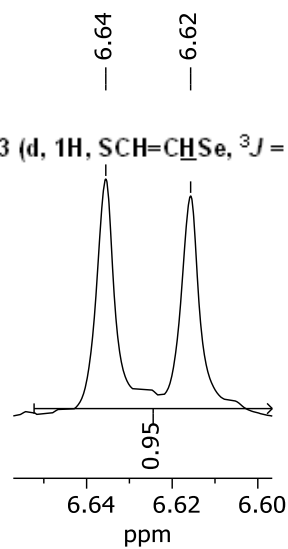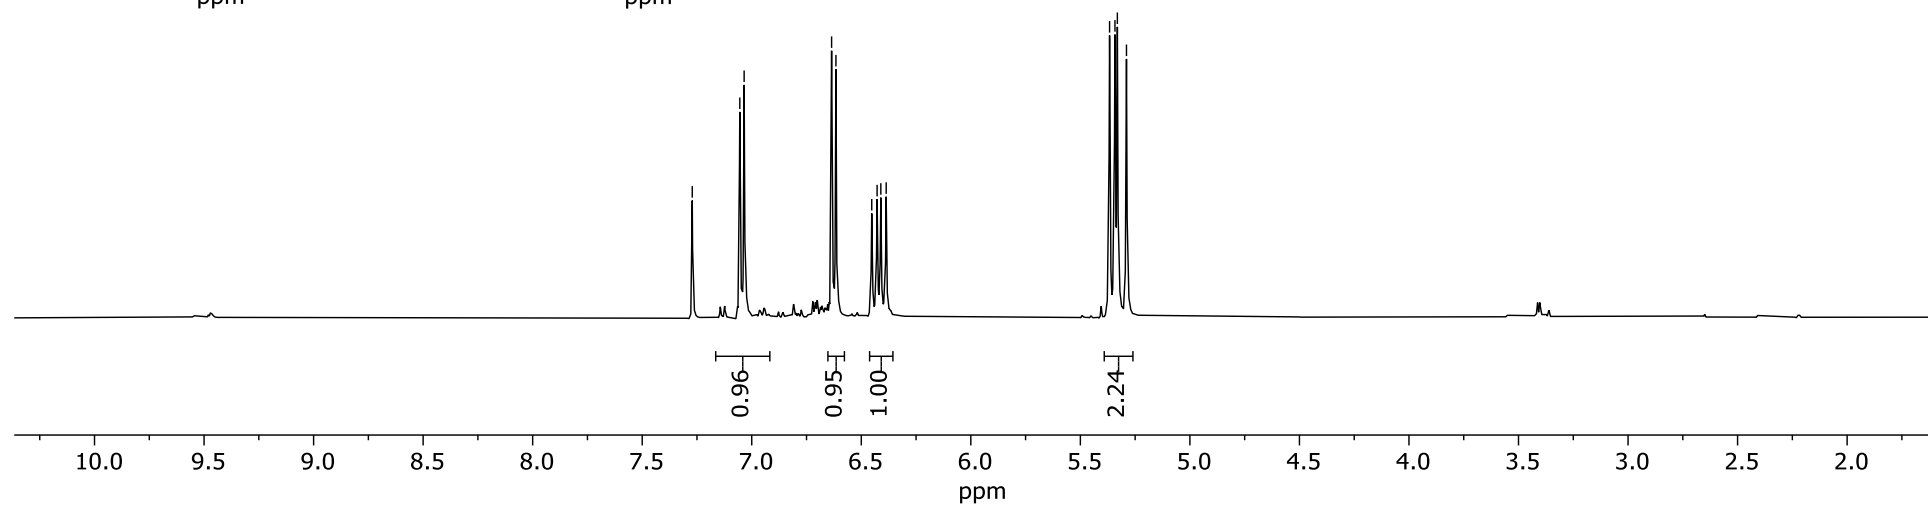

<sup>1</sup>H NMR spectrum of 1,2-bis[(Z)-2-(vinylsulfanyl)ethenyl]diselane (1)

13C

~ 129.61  
~ 127.72  
~ 124.95

— 114.37

— 77.00

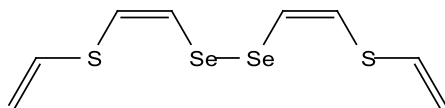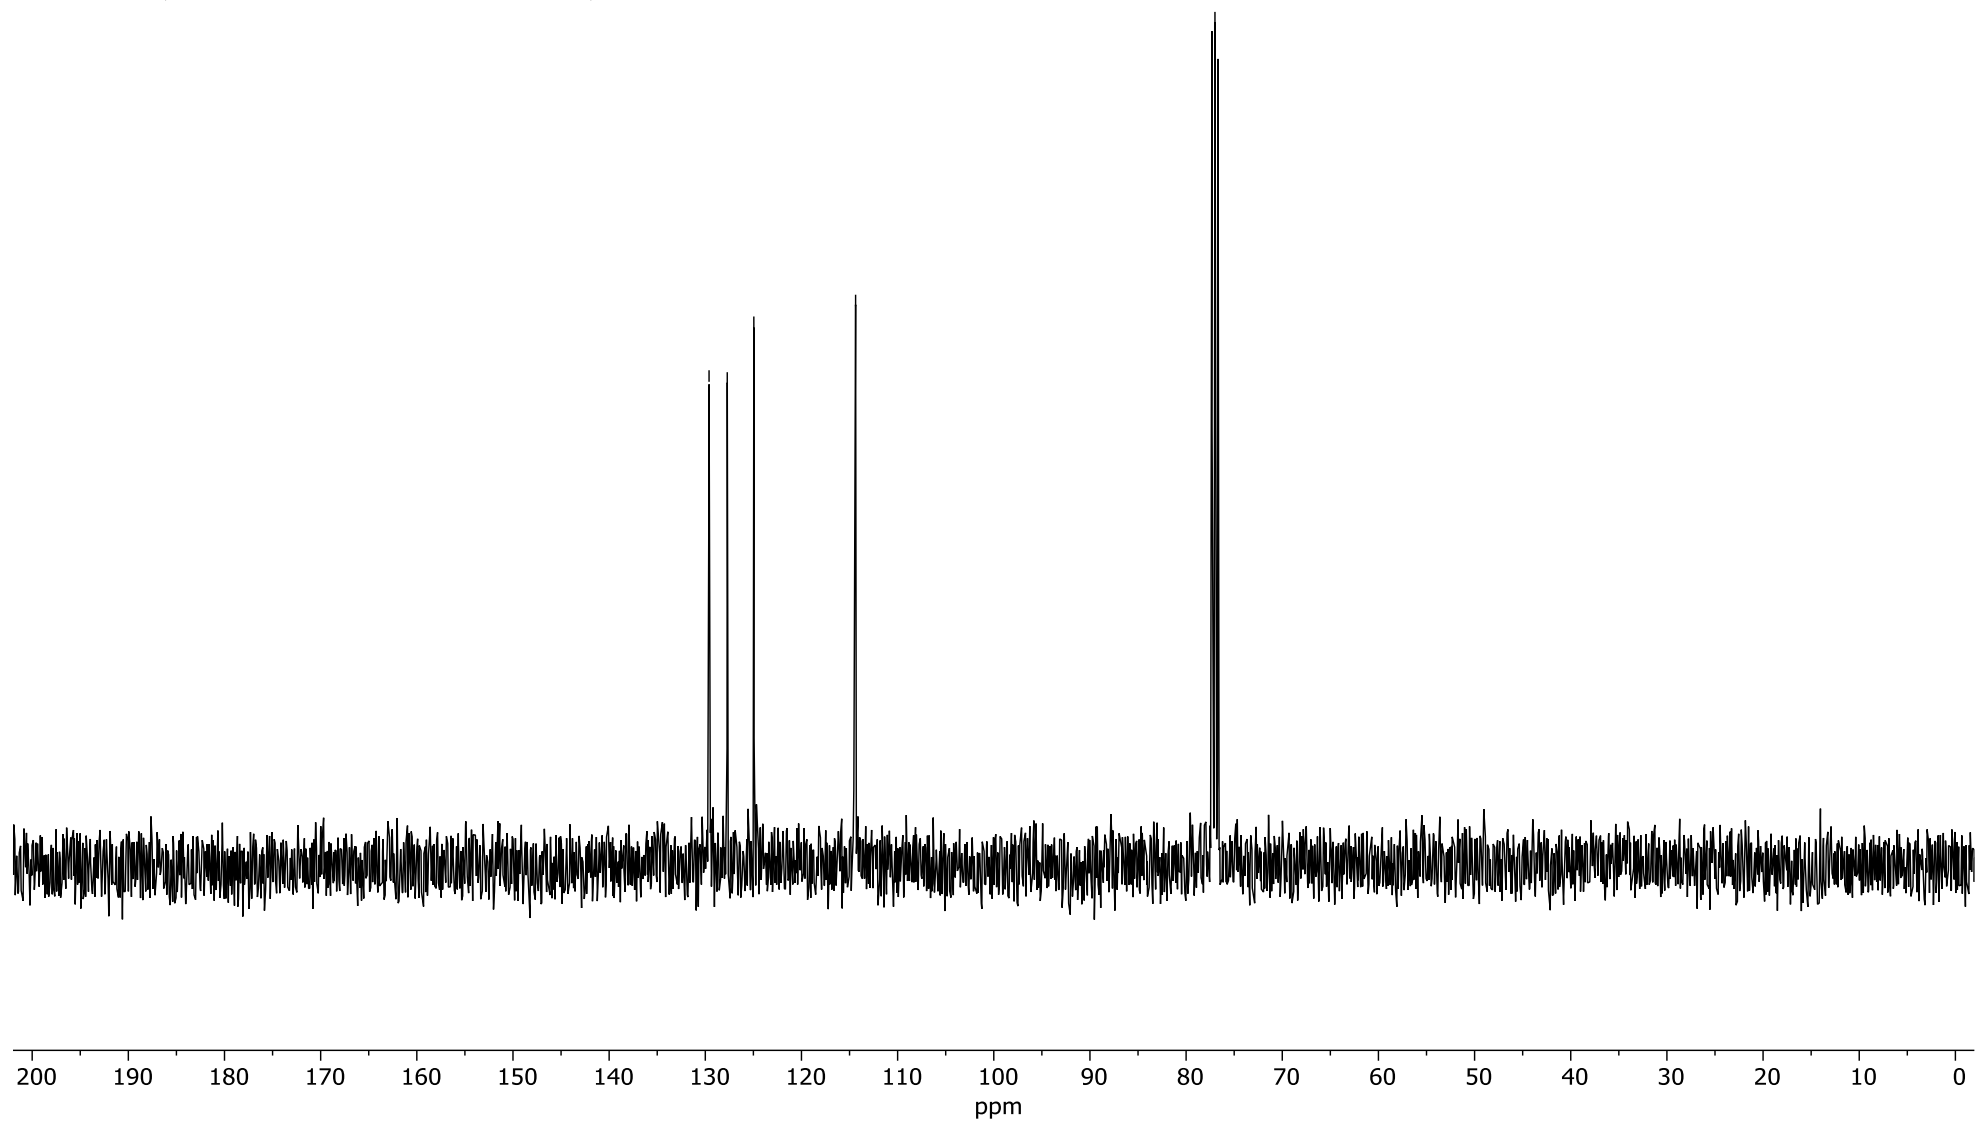

<sup>13</sup>C NMR spectrum of 1,2-bis[(Z)-2-(vinylsulfanyl)ethenyl]diselane (1)

<sup>77</sup>Se

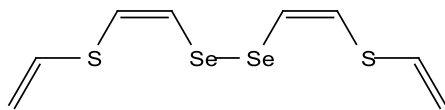

— 418.48

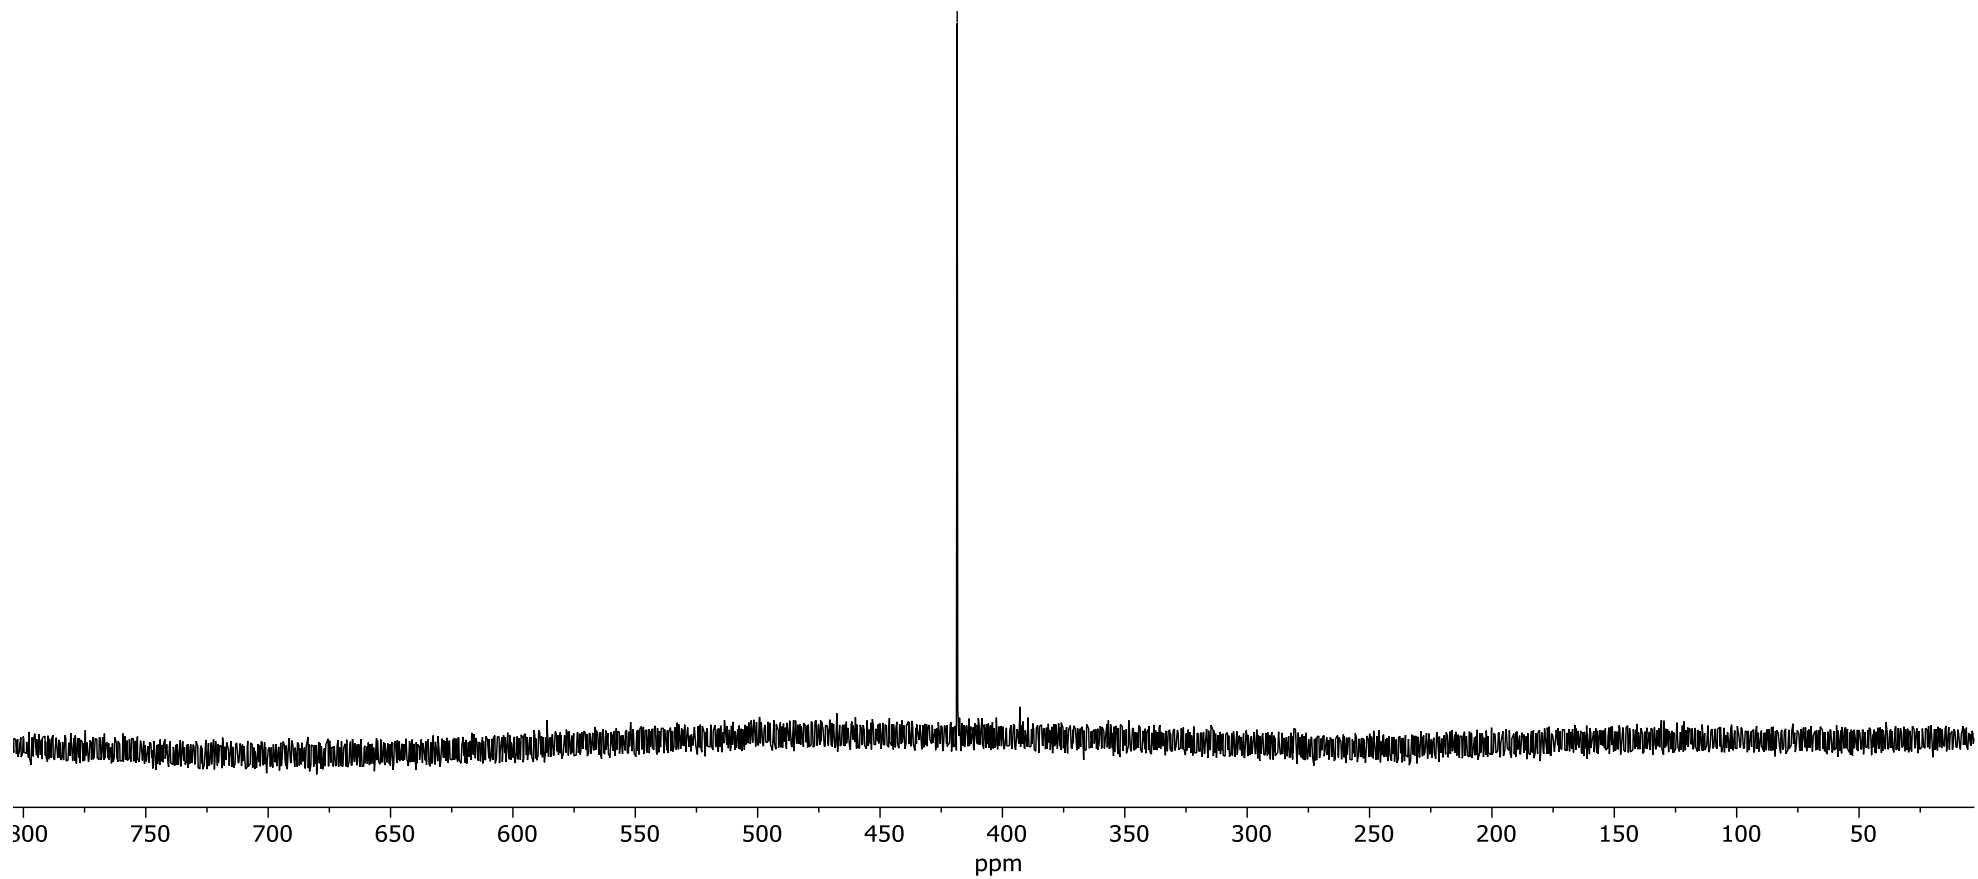

<sup>77</sup>Se NMR spectrum of 1,2-bis[(Z)-2-(vinylsulfanyl)ethenyl]diselane (1)

<sup>1</sup>H

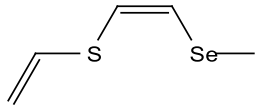

7.27  
6.66  
6.64  
6.58  
6.56  
6.47  
6.44  
6.43  
6.40  
5.34  
5.32  
5.32  
5.28

6.66

6.64

6.58

6.56

6.65 (d, 1H, SCH=CHSe, <sup>3</sup>J = 8.3 Hz)

6.57 (d, 1H, SCH=CHSe, <sup>3</sup>J = 8.3 Hz)

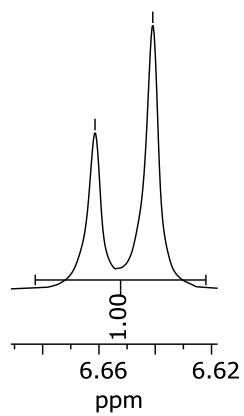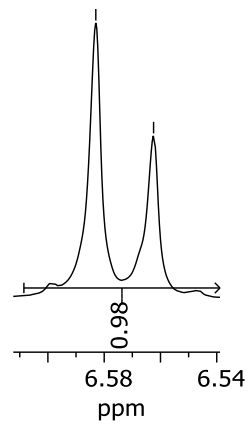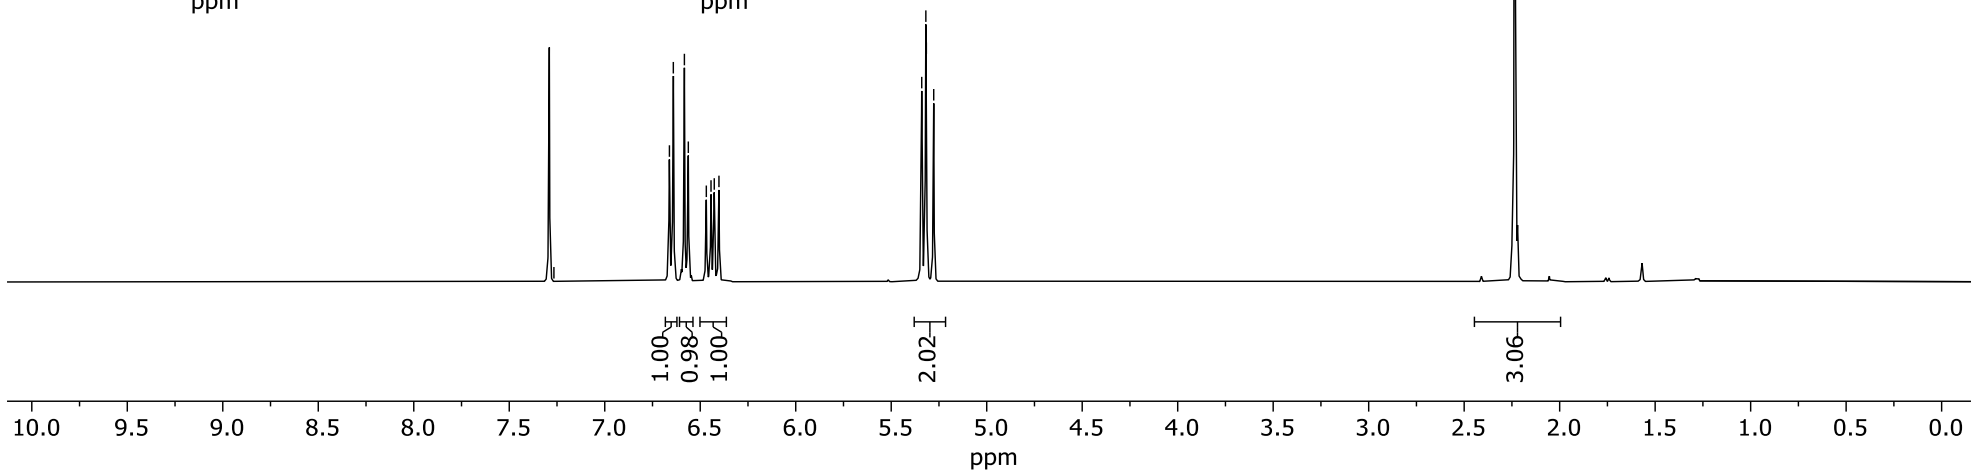

<sup>1</sup>H NMR spectrum of (Z)-2-(methylselanyl)ethenyl vinyl sulfide (2a)



13C

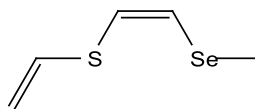

~ 129.93  
/ 124.65  
/ 122.38  
— 113.27

— 7.18

— 125.18  
— 124.65  
— 124.11

125.0  
124.5  
ppm

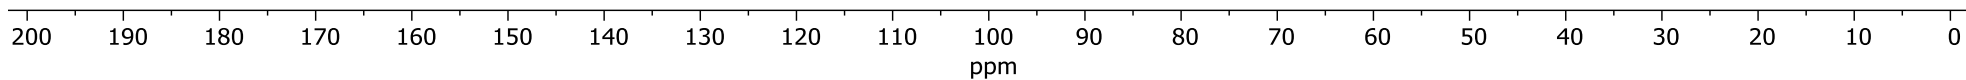

<sup>13</sup>C NMR spectrum of (Z)-2-(methylselanyl)ethenyl vinyl sulfide (2a)

<sup>77</sup>Se

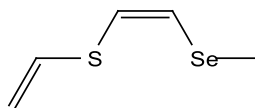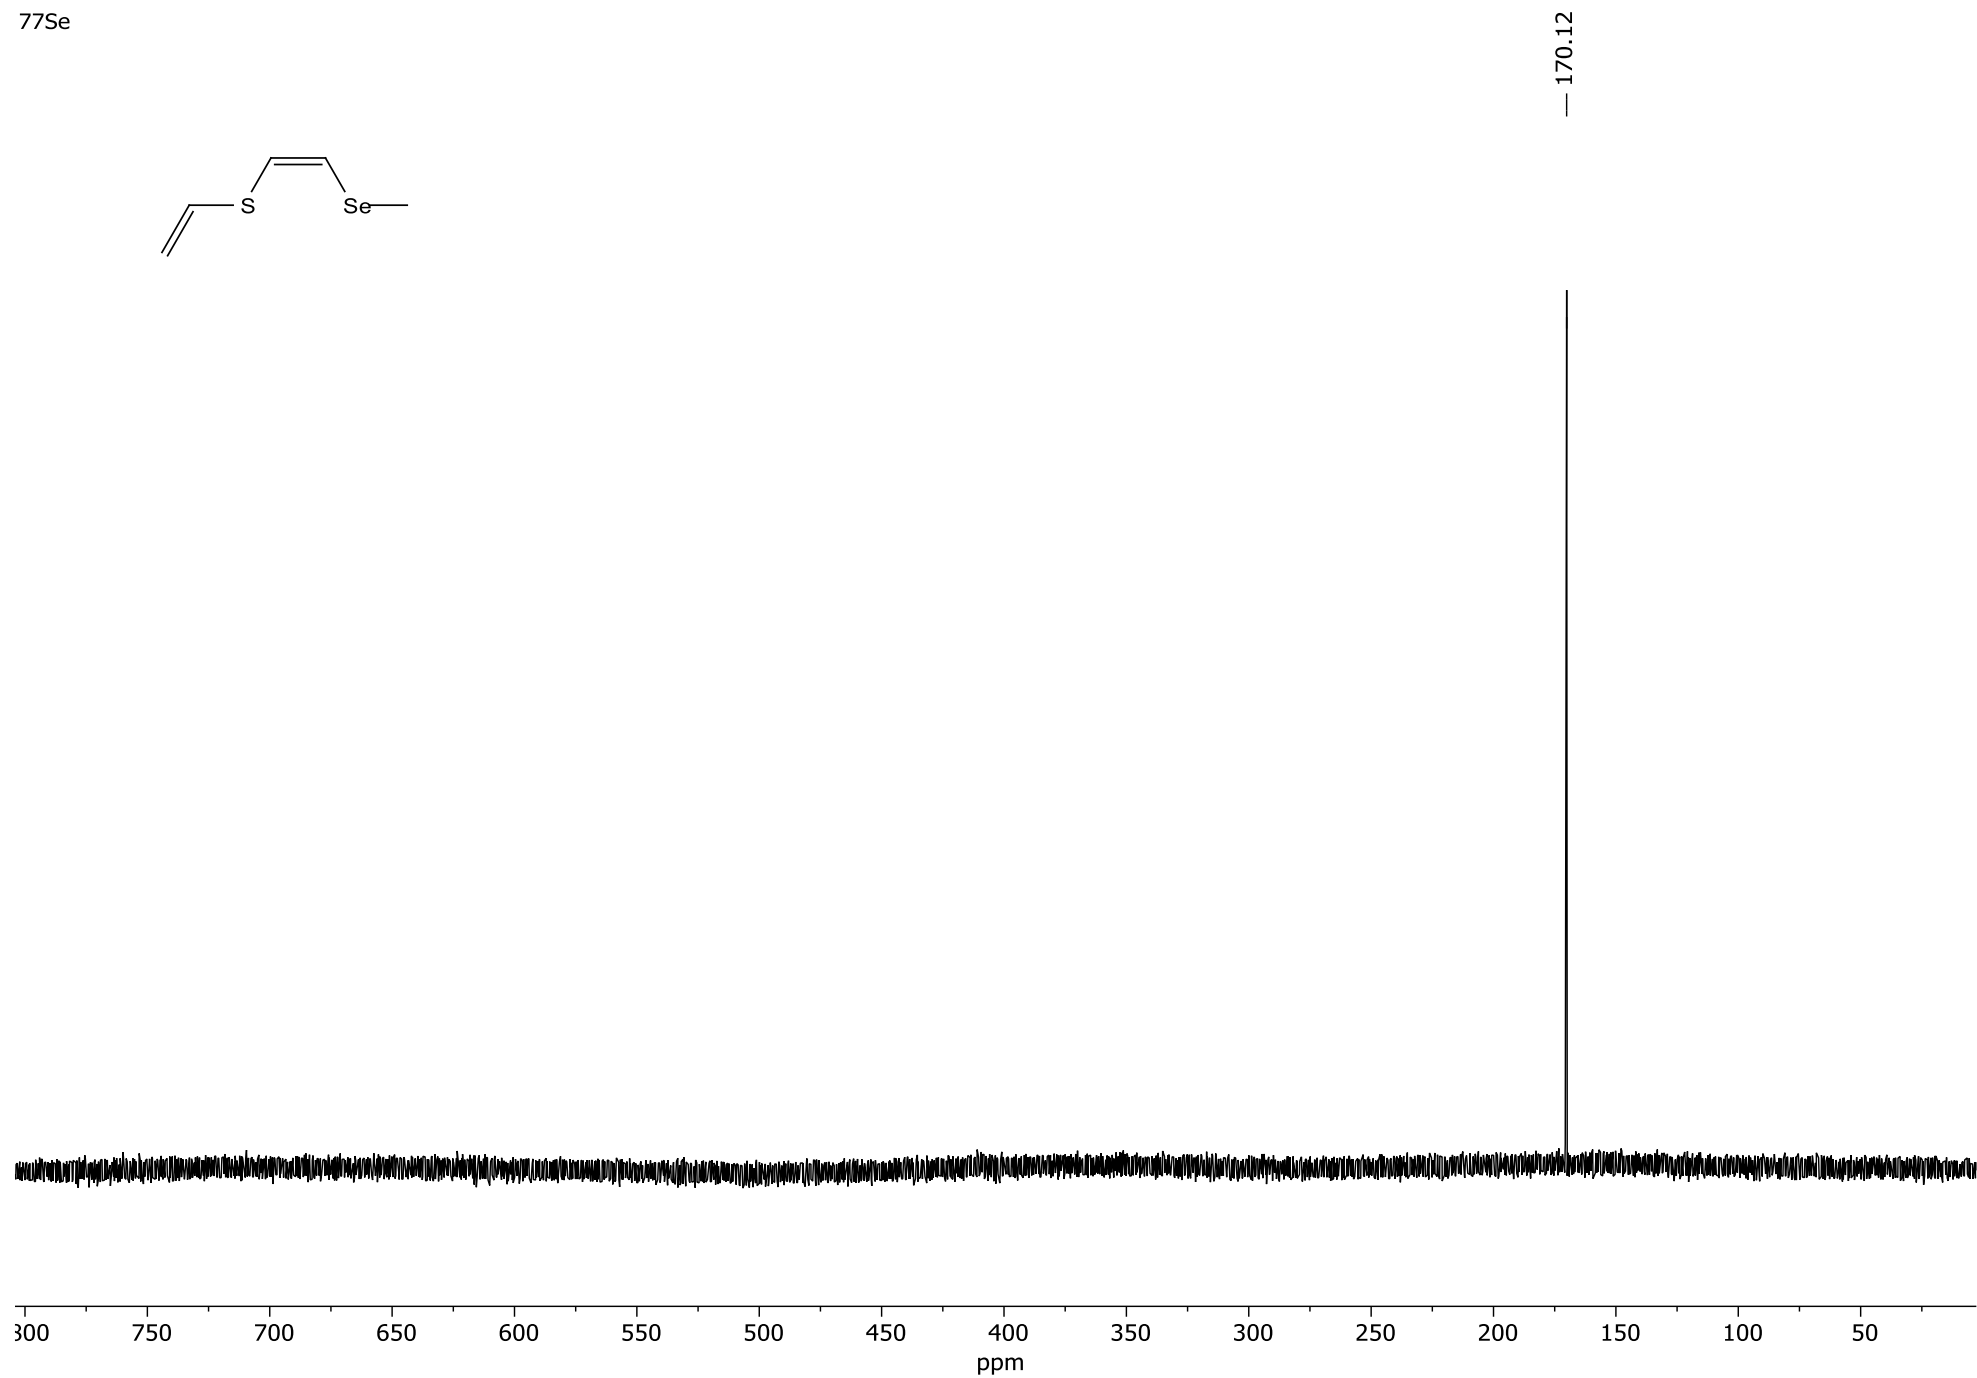

<sup>77</sup>Se NMR spectrum of (Z)-2-(methylselanyl)ethenyl vinyl sulfide (2a)

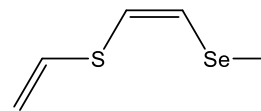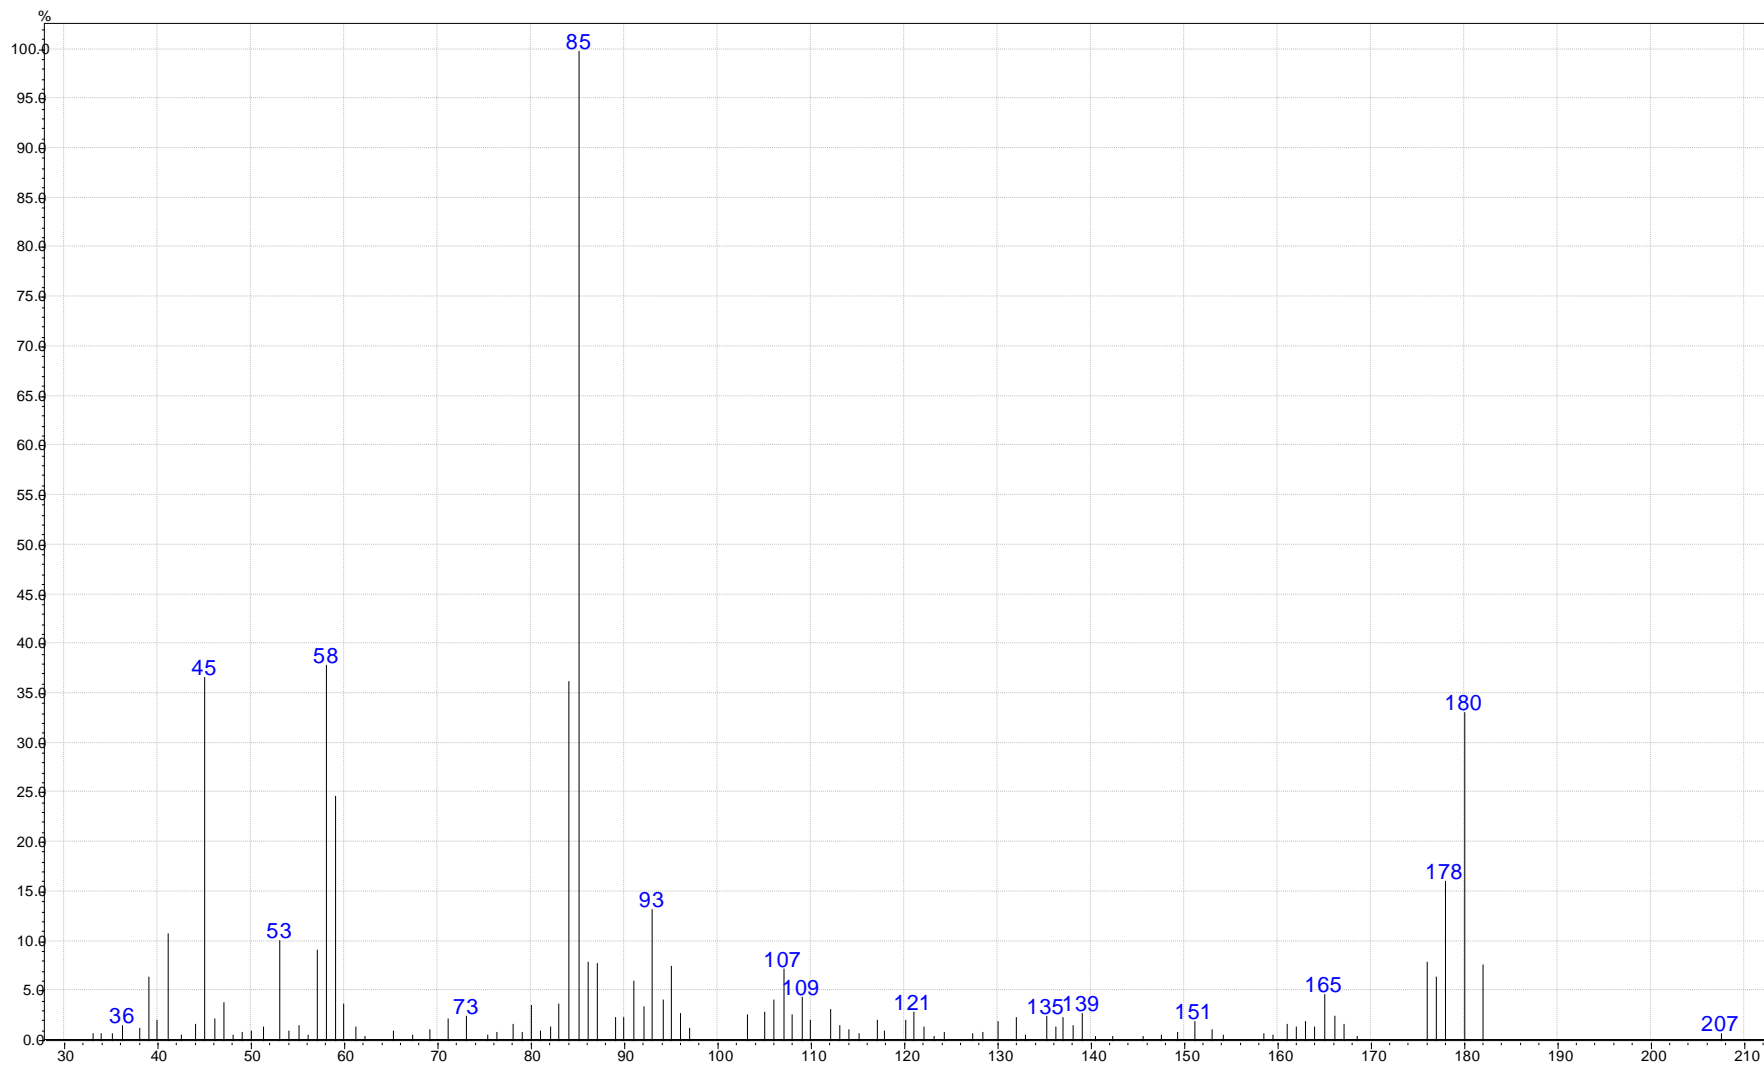

Mass-spectrum of (Z)-2-(methylselanyl)ethenyl vinyl sulfide (2a)

<sup>1</sup>H

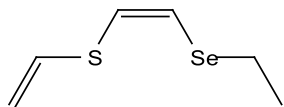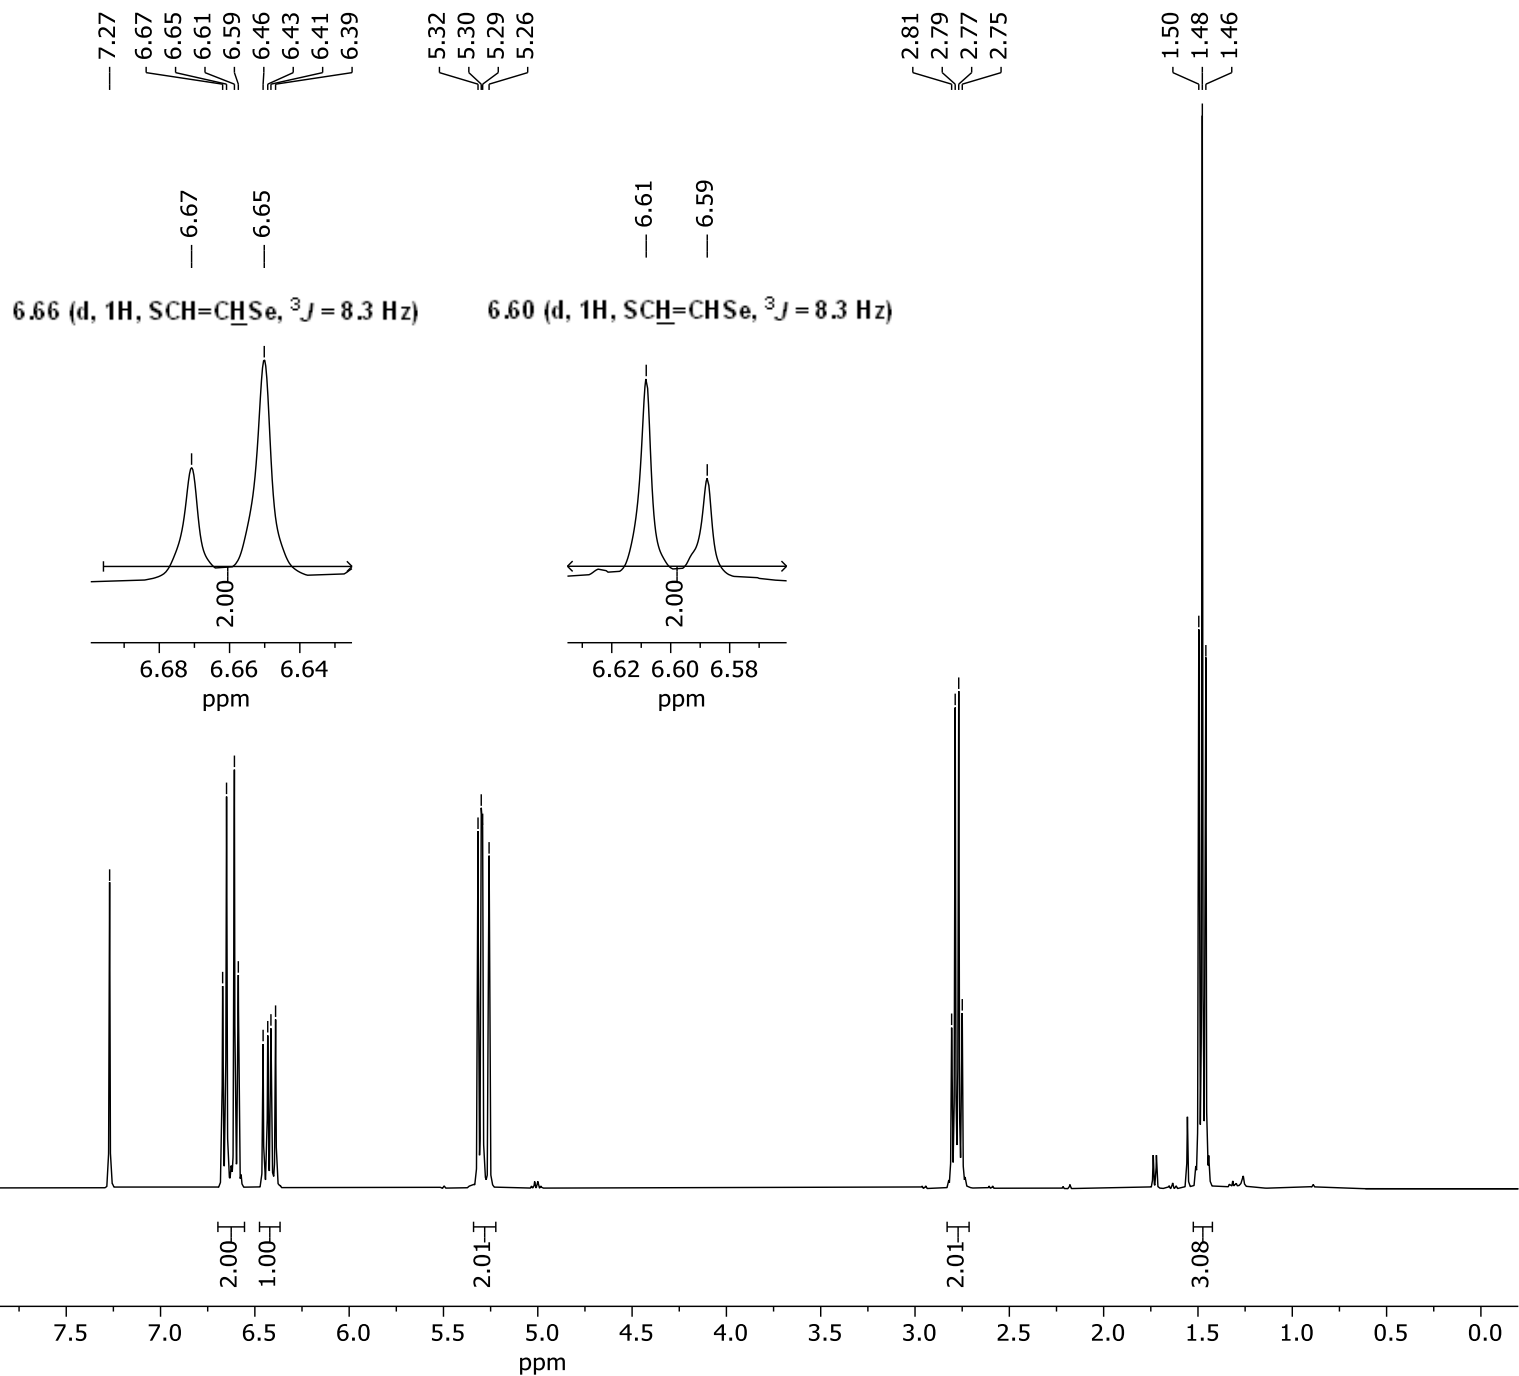

<sup>1</sup>H NMR spectrum of (Z)-2-(ethylselanyl)ethenyl vinyl sulfide (2b)

13C

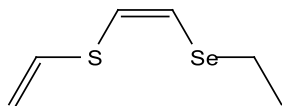

— 130.06

— 123.26

— 122.64

— 113.25

— 20.73

— 16.10

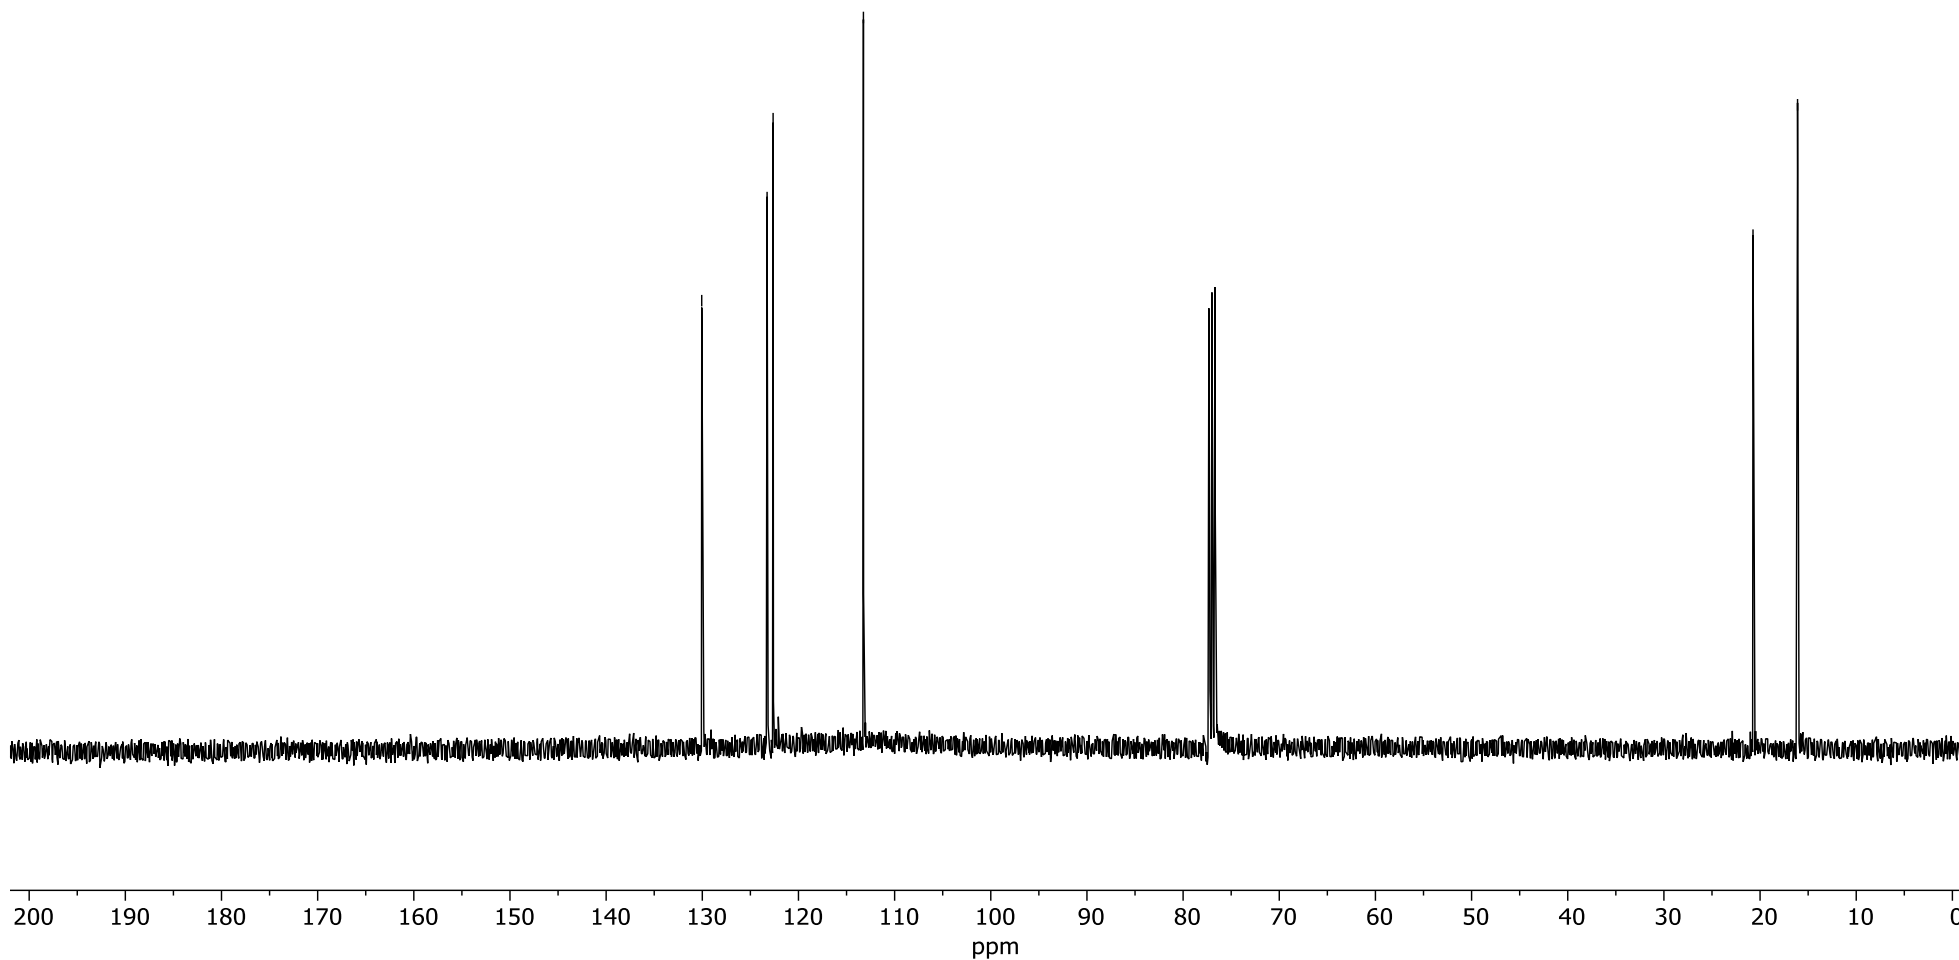

<sup>13</sup>C NMR spectrum of (Z)-2-(ethylselanyl)ethenyl vinyl sulfide (2b)

<sup>77</sup>Se

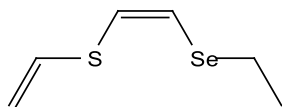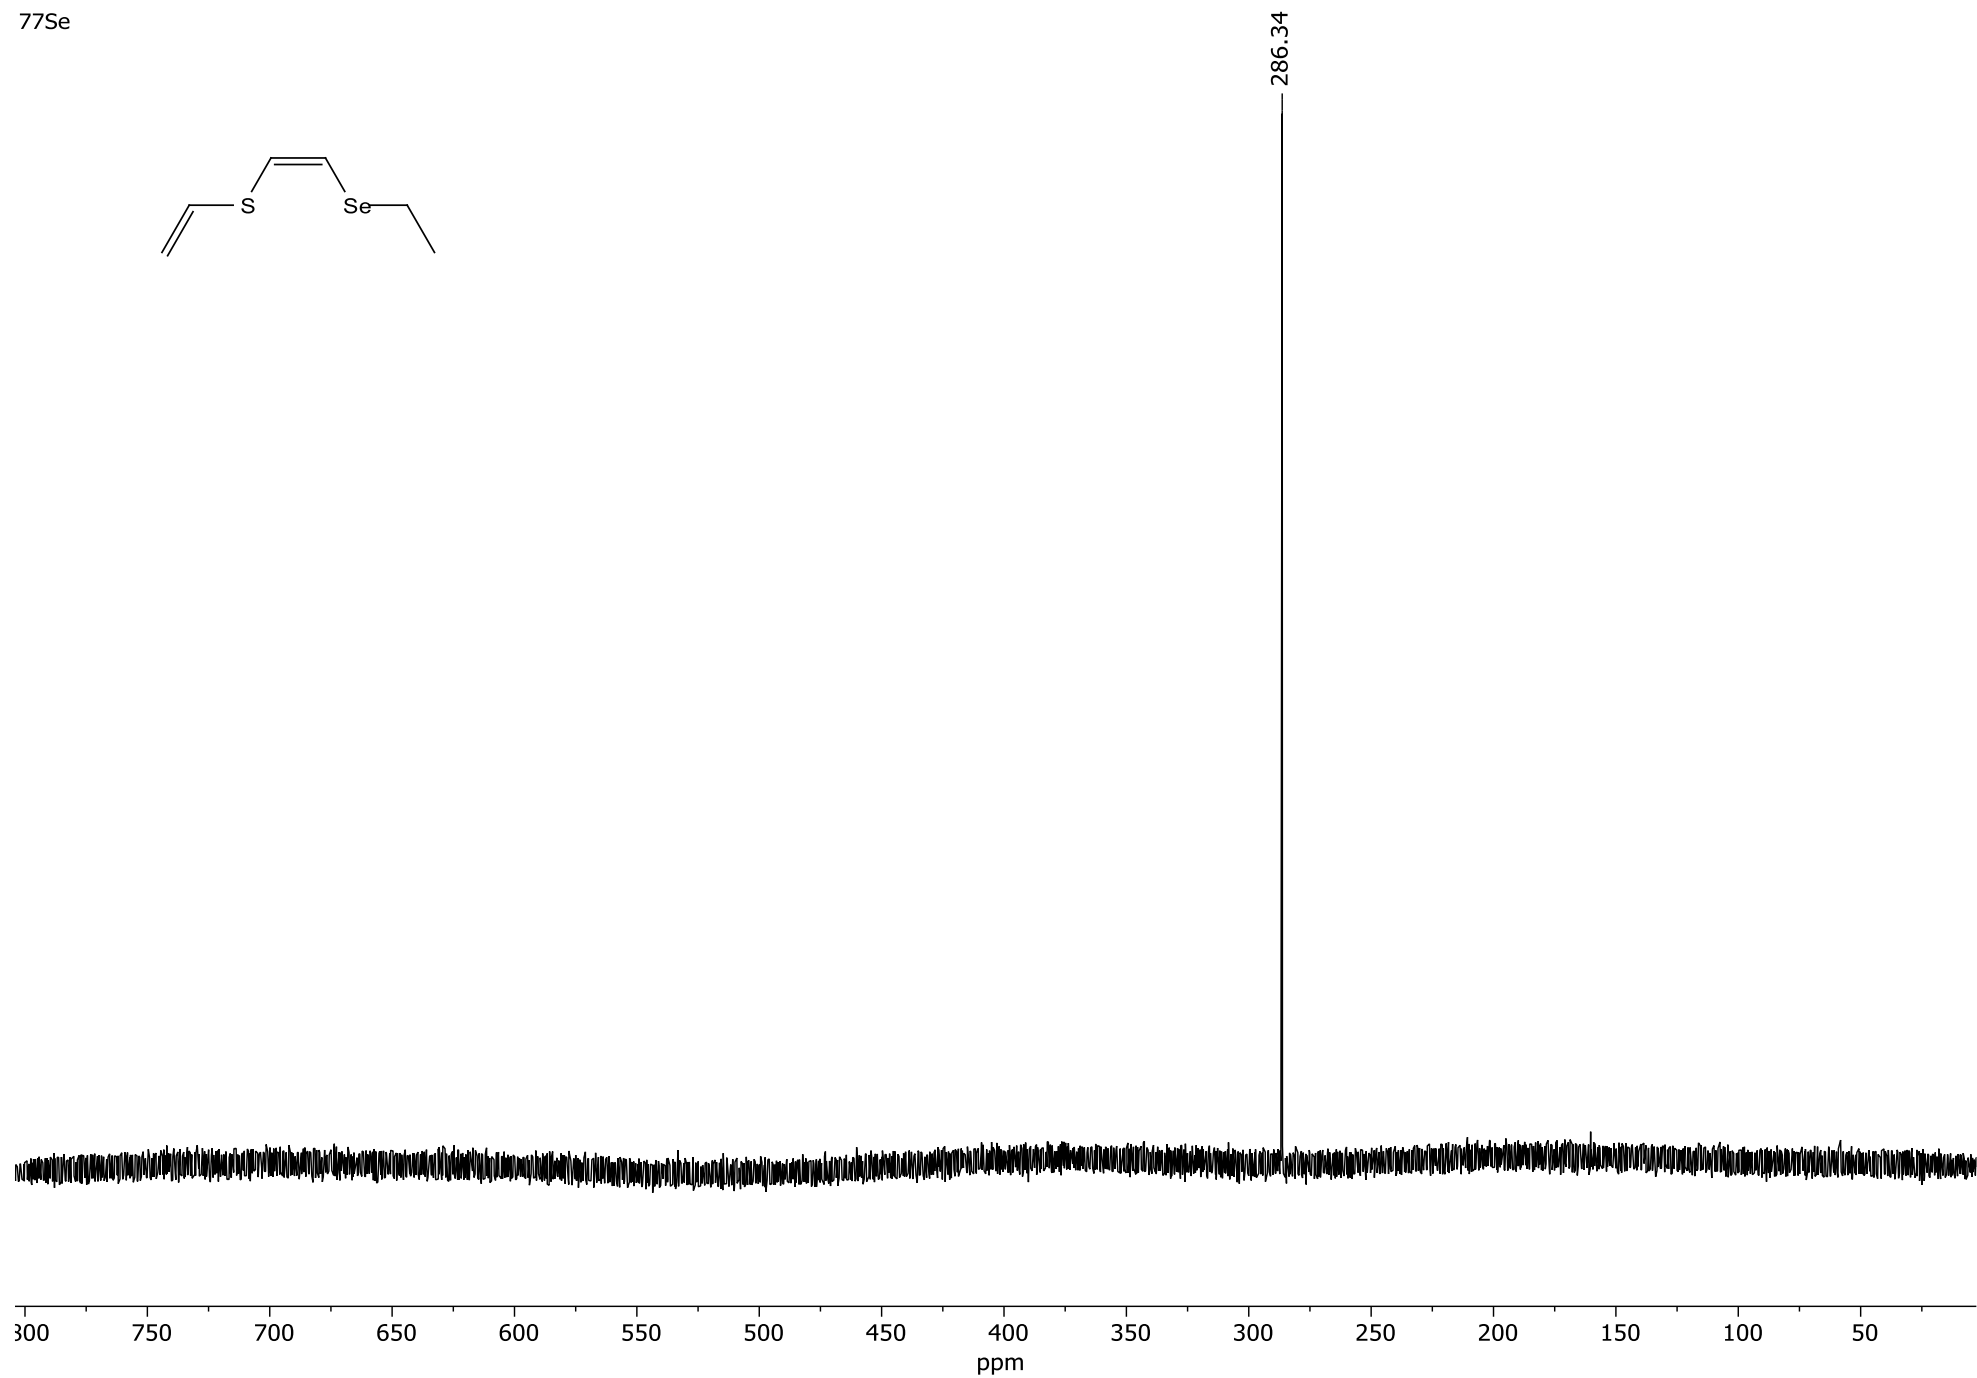

<sup>77</sup>Se NMR spectrum of (*Z*)-2-(ethylselanyl)ethenyl vinyl sulfide (**2b**)

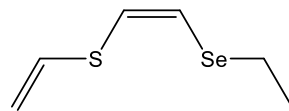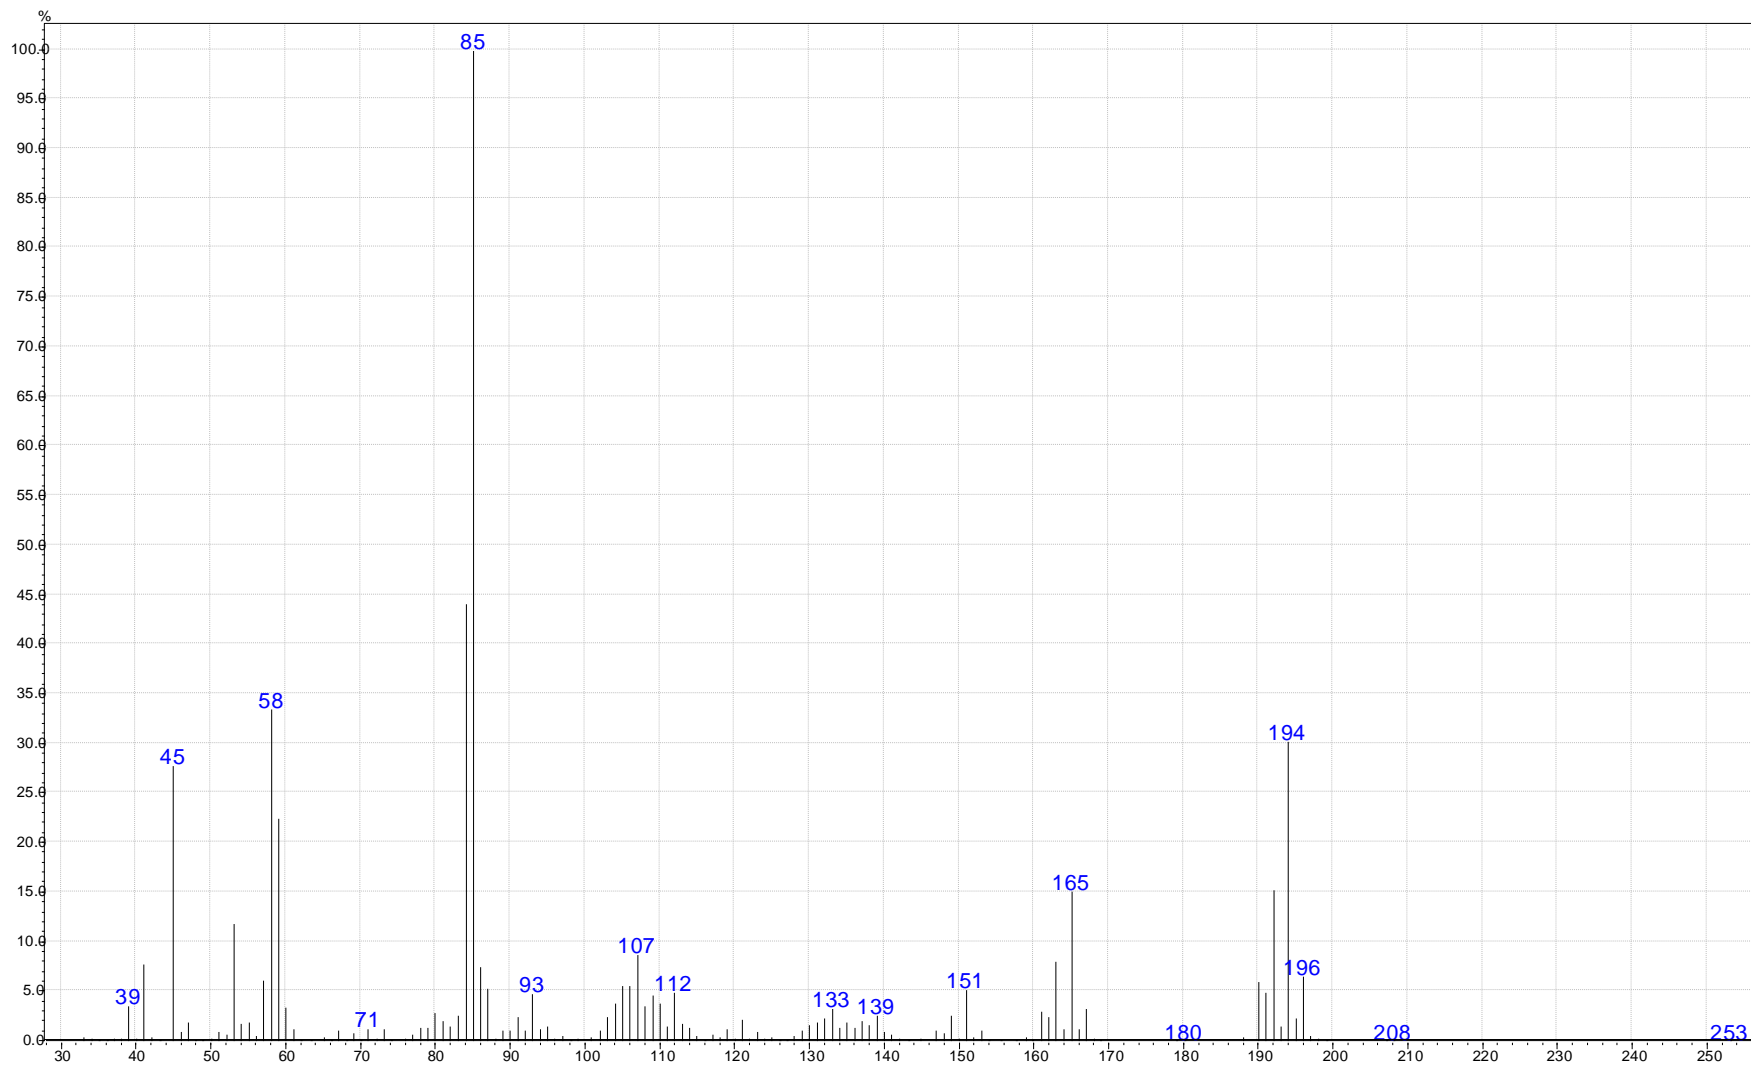

Mass spectrum of (Z)-2-(ethylselanyl)ethenyl vinyl sulfide (2b)

<sup>1</sup>H

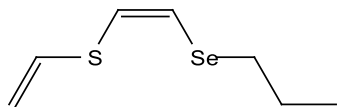

7.27  
6.66  
6.64  
6.58  
6.56  
6.46  
6.43  
6.42  
6.39  
5.32  
5.30  
5.29  
5.26  
2.77  
2.75  
2.74  
1.79  
1.77  
1.76  
1.74  
1.04  
1.02  
1.00

6.66  
6.64

6.58  
6.56

6.65 (d, 1H, SCH=CHSe, <sup>3</sup>J = 8.3 Hz)

6.57 (d, 1H, SCH=CHSe, <sup>3</sup>J = 8.3 Hz)

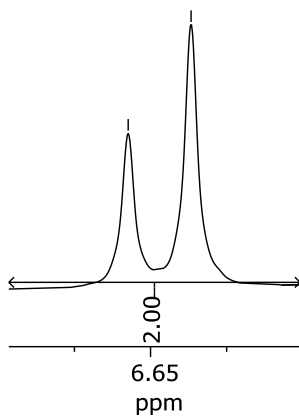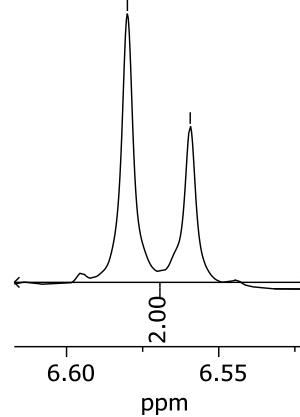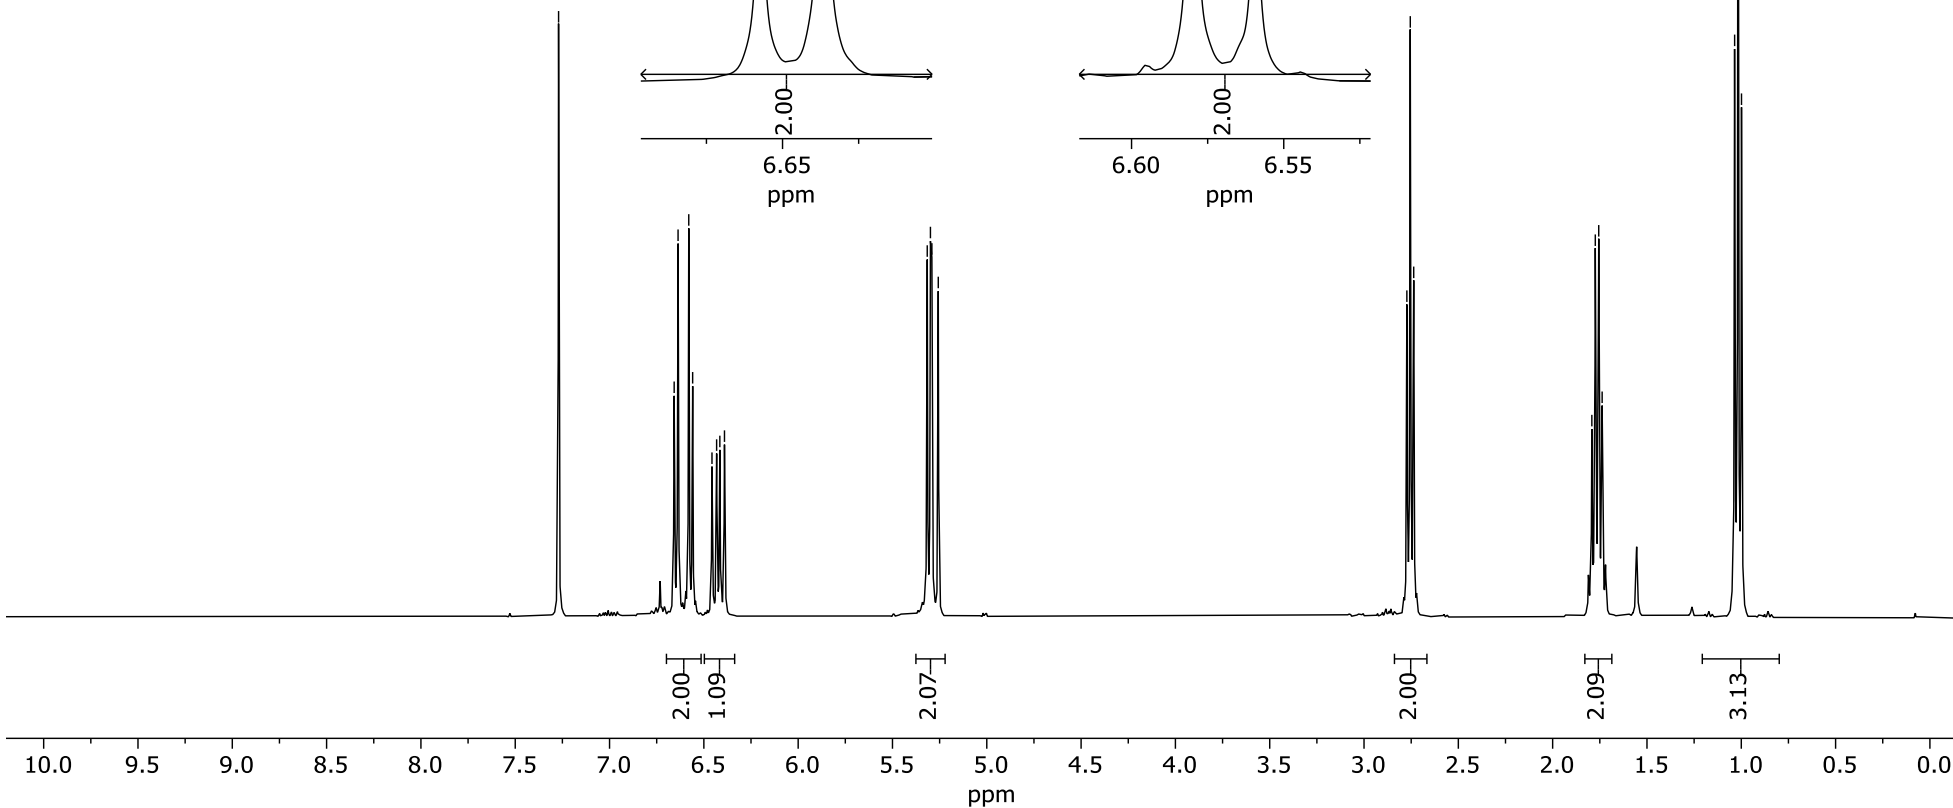

<sup>1</sup>H NMR spectrum of (Z)-2-(propylselanyl)ethenyl vinyl sulfide (2c)



13C

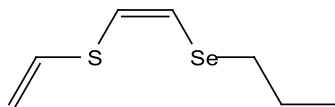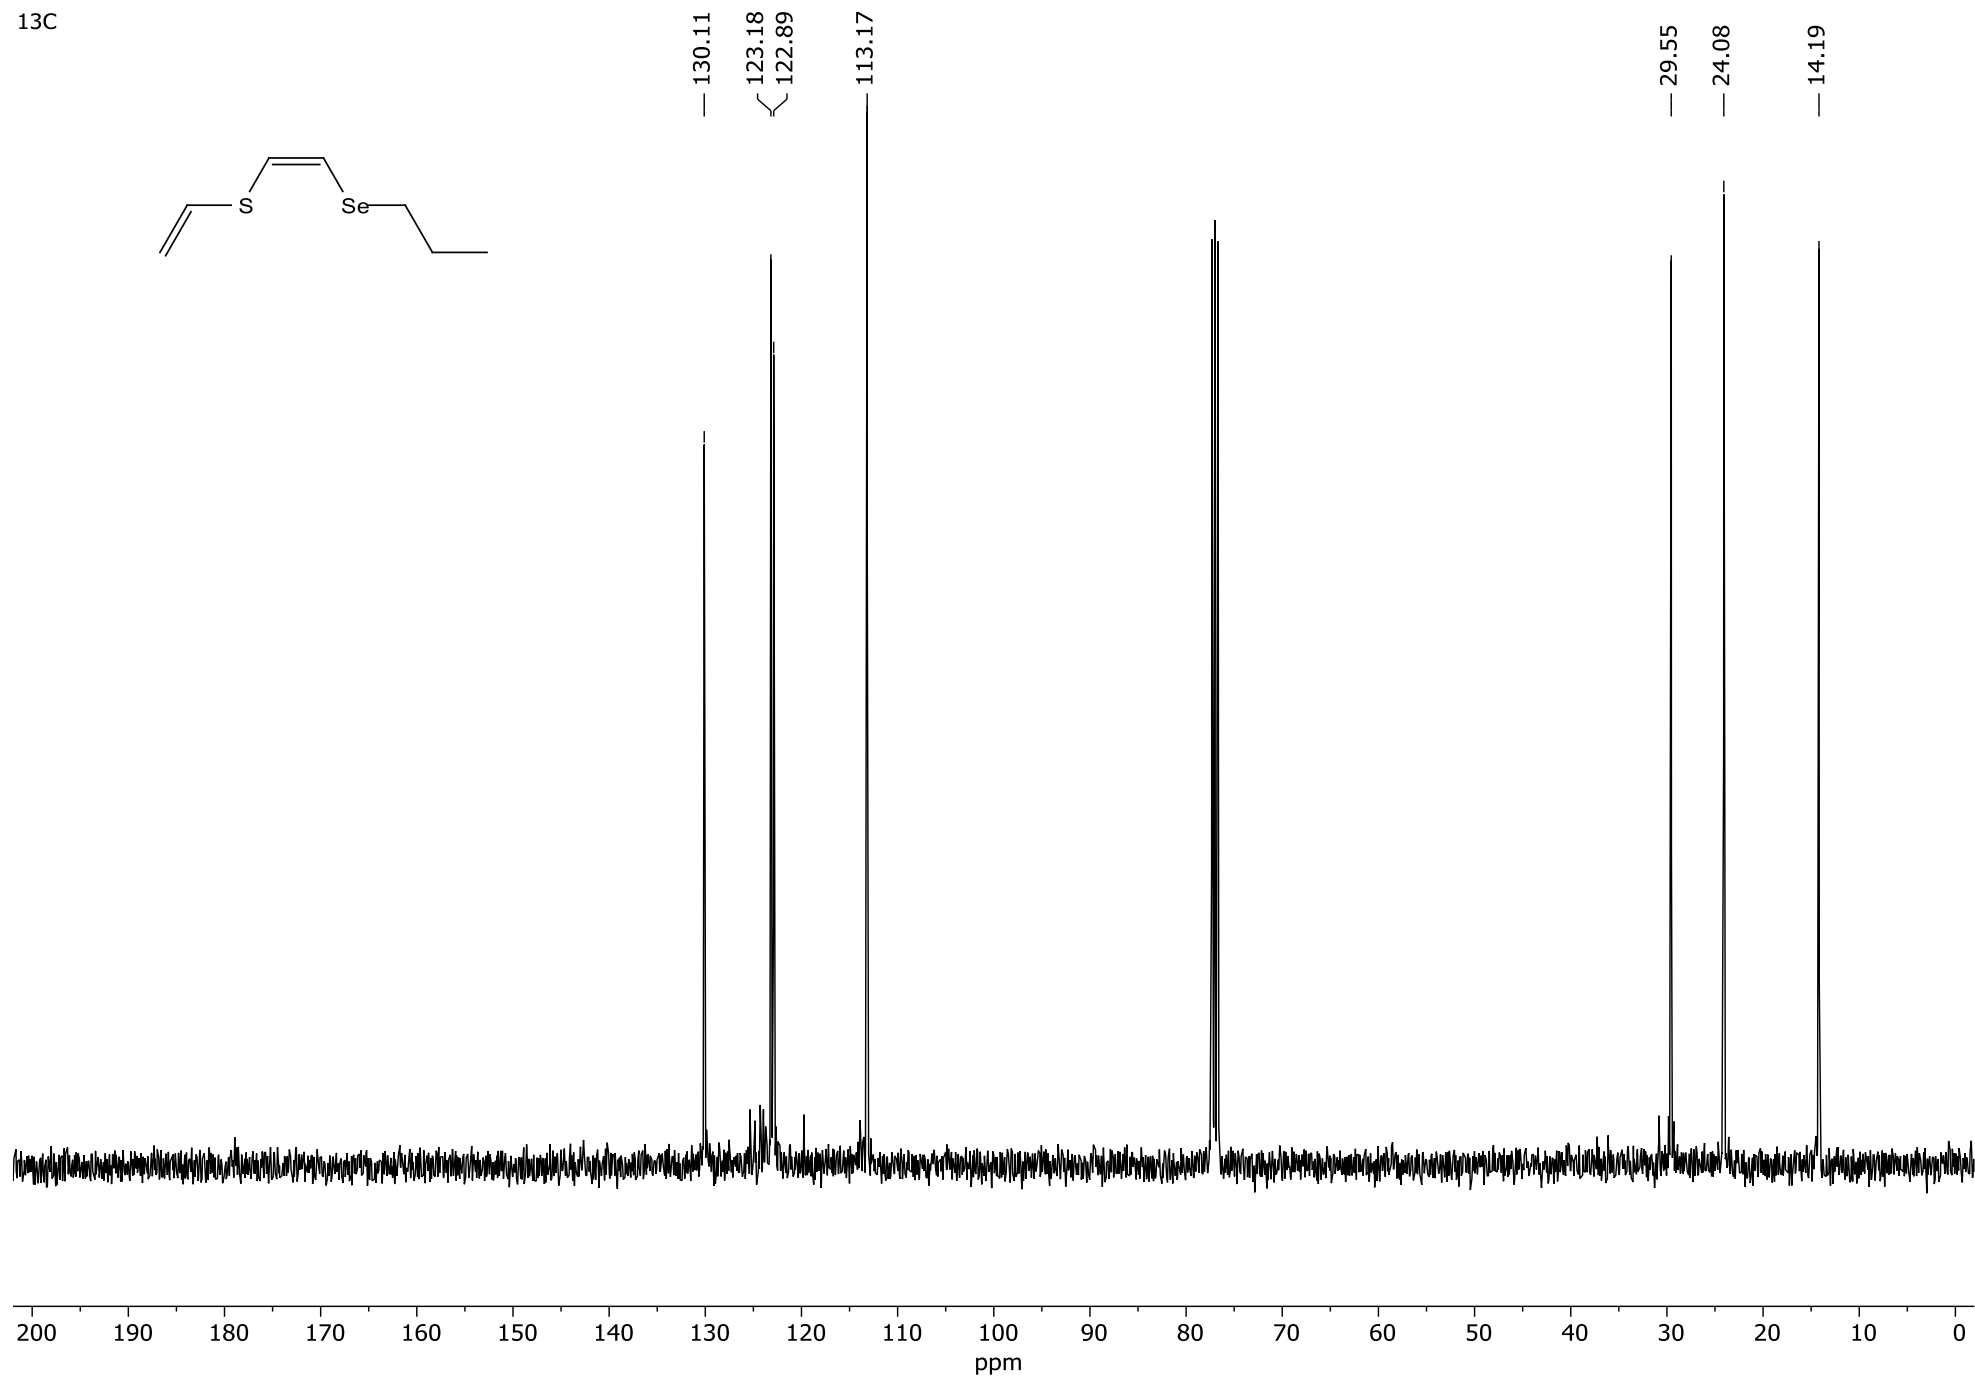

<sup>13</sup>C NMR spectrum of (Z)-2-(propylselanyl)ethenyl vinyl sulfide (2c)

<sup>77</sup>Se

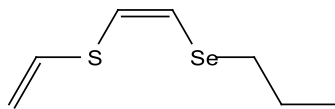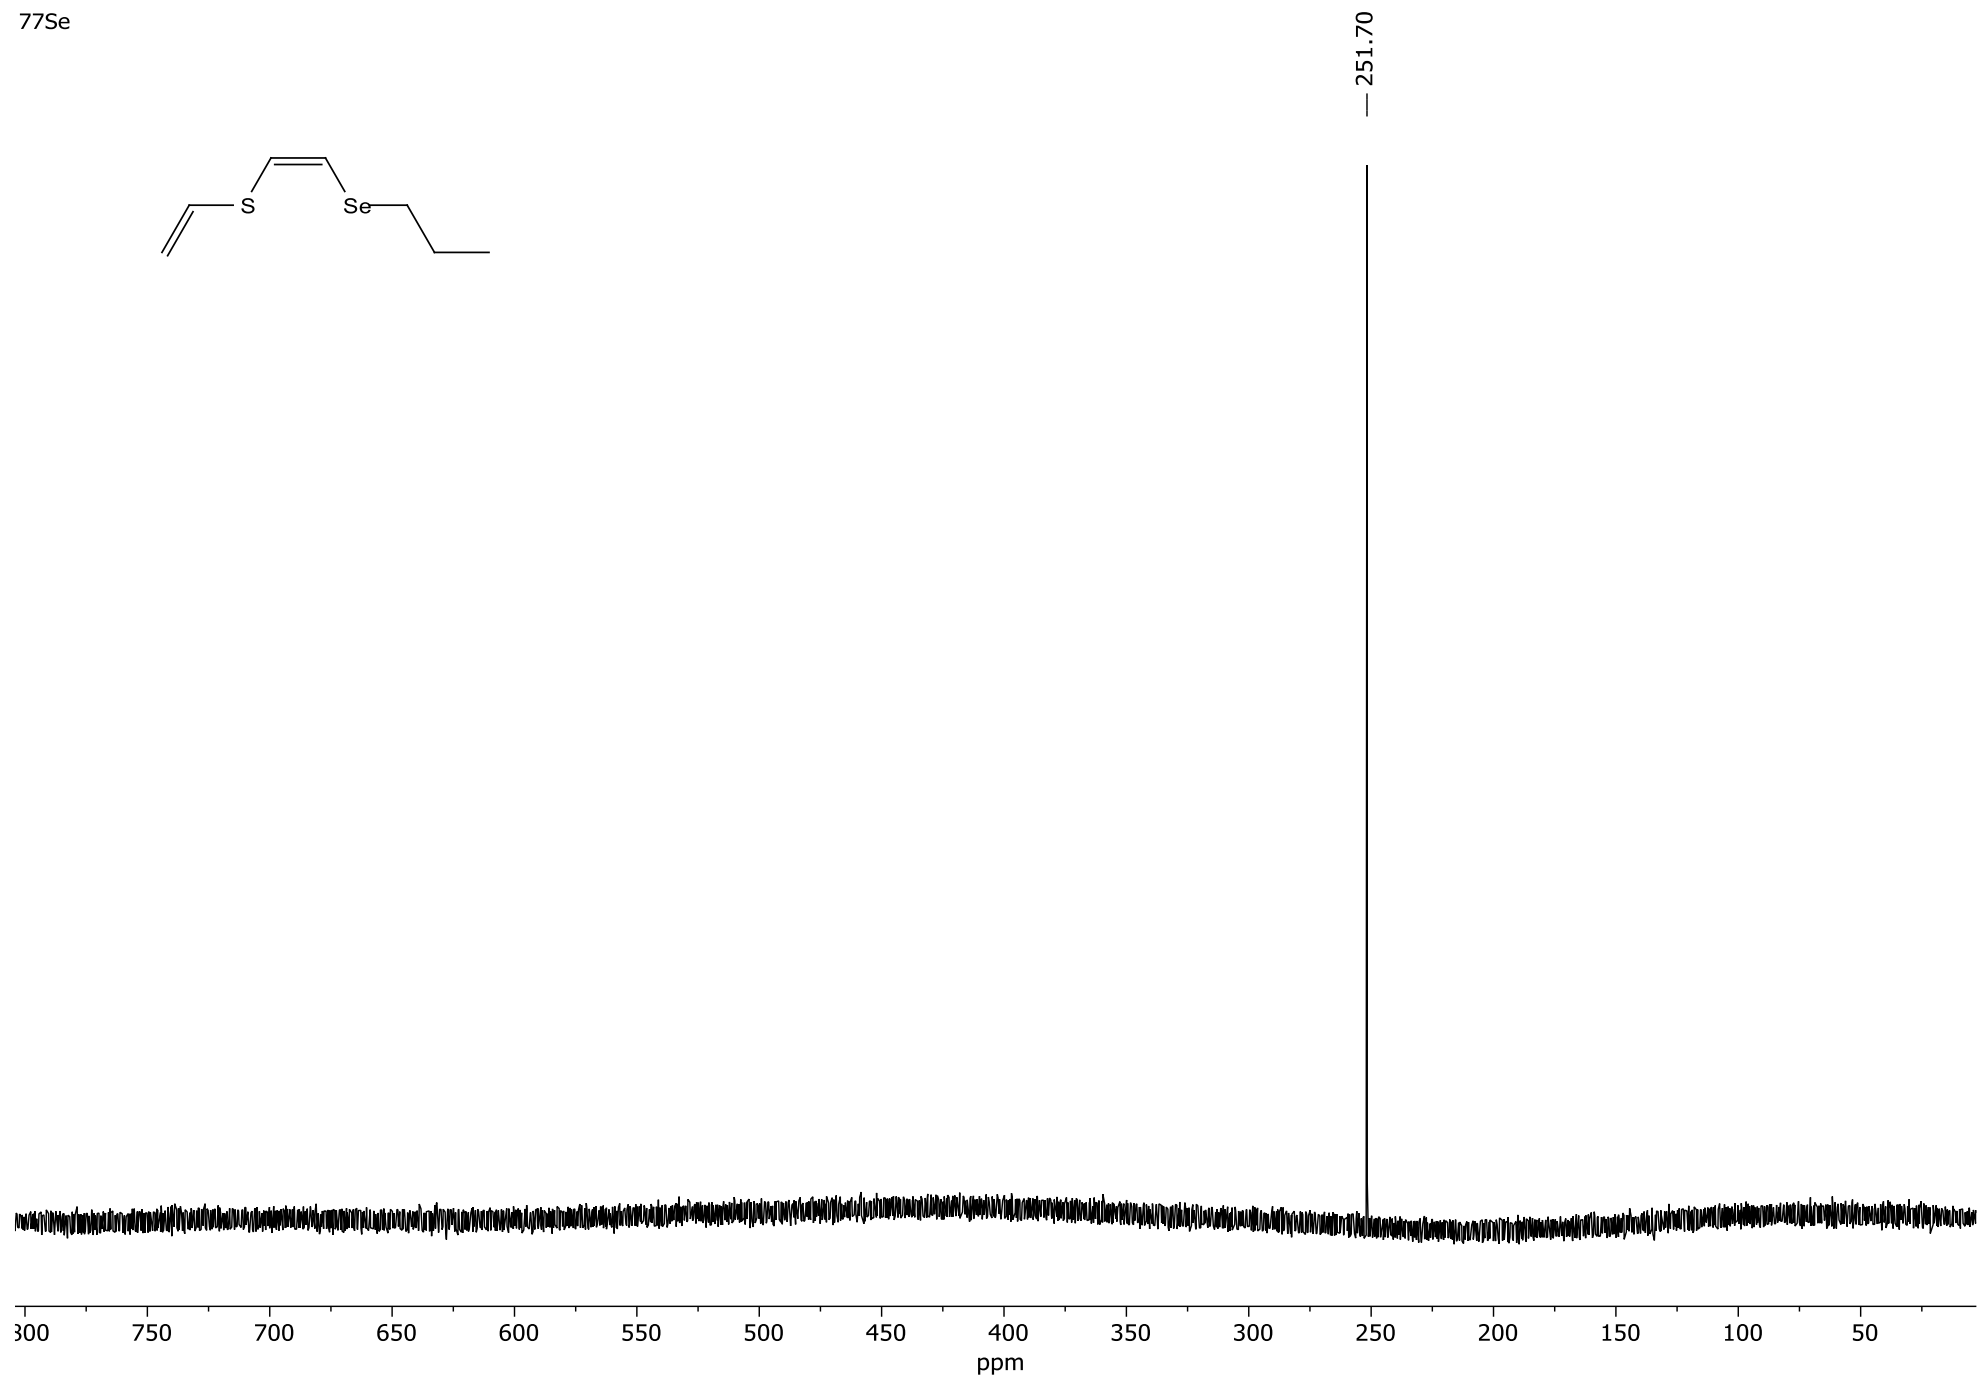

<sup>77</sup>Se NMR spectrum of (Z)-2-(propylselanyl)ethenyl vinyl sulfide (2c)

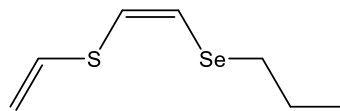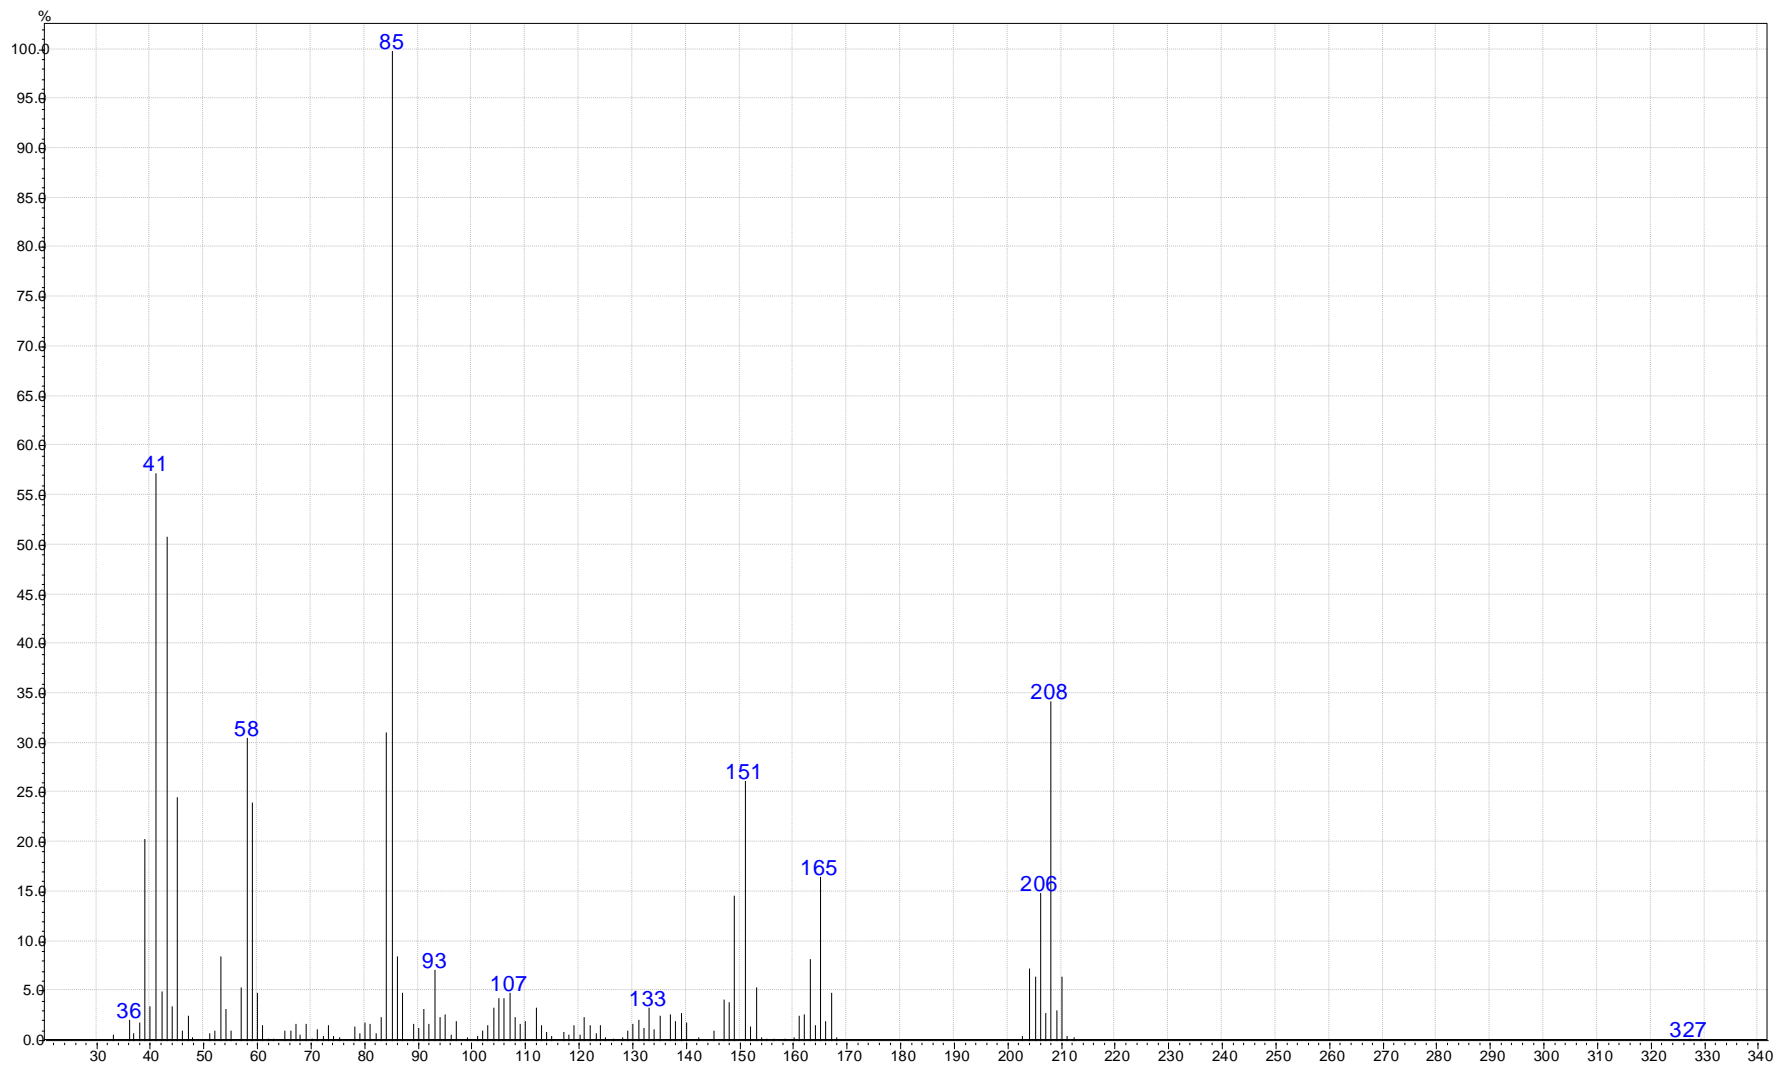

Mass-spectrum of (Z)-2-(propylselanyl)ethenyl vinyl sulfide (2c)

<sup>1</sup>H

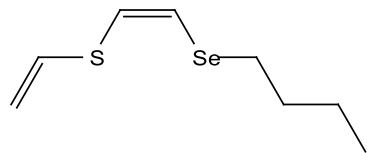

7.27, 6.66, 6.64, 6.58, 6.56, 6.46, 6.43, 6.41, 6.39, 5.31, 5.30, 5.29, 5.26, 2.79, 2.77, 2.75, 1.76, 1.74, 1.72, 1.70, 1.68, 1.48, 1.46, 1.44, 1.42, 1.40, 1.38, 0.95, 0.93, 0.91

6.66, 6.64, 6.58, 6.56

6.65 (d, 1H, SCH=CHSe, <sup>3</sup>J = 8.3 Hz)      6.57 (d, 1H, SCH=CHSe, <sup>3</sup>J = 8.3 Hz)

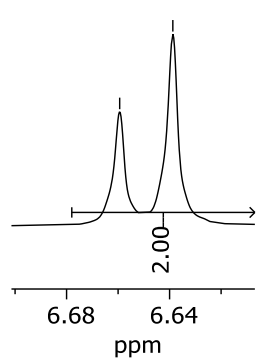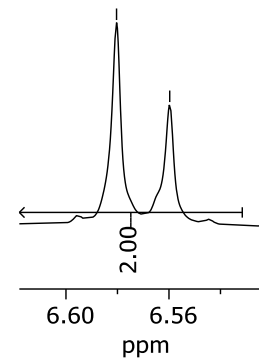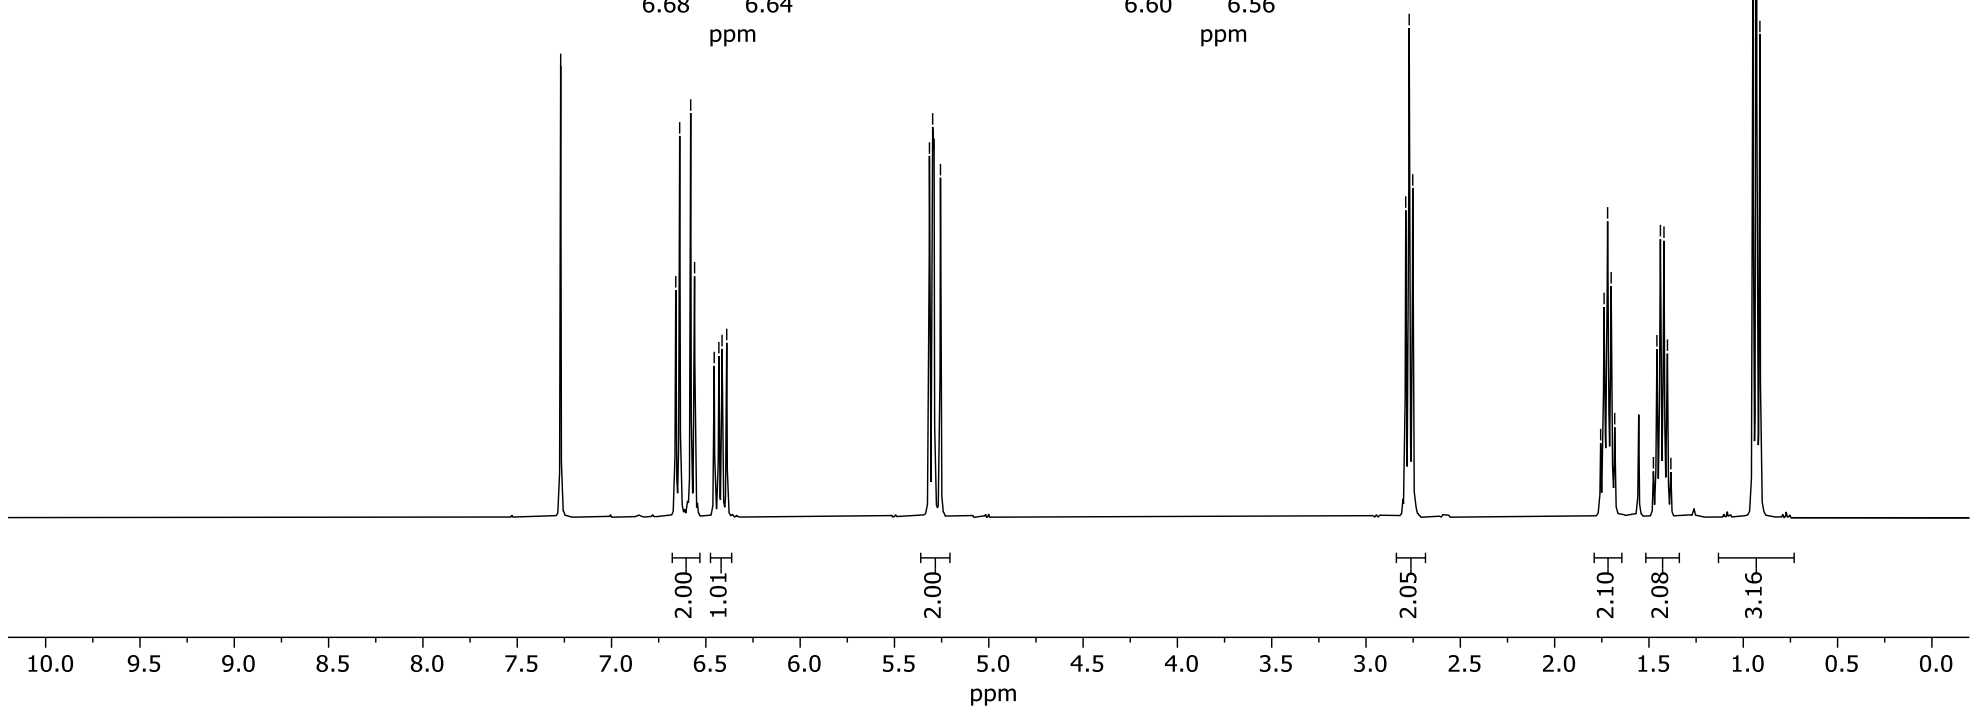

<sup>1</sup>H NMR spectrum of (Z)-2-(butylselanyl)ethenyl vinyl sulfide (2d)

13C

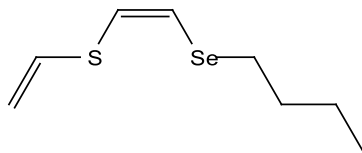

— 130.11

— 123.23

— 122.85

— 113.21

— 77.00

— 32.89

— 27.15

— 22.73

— 13.53

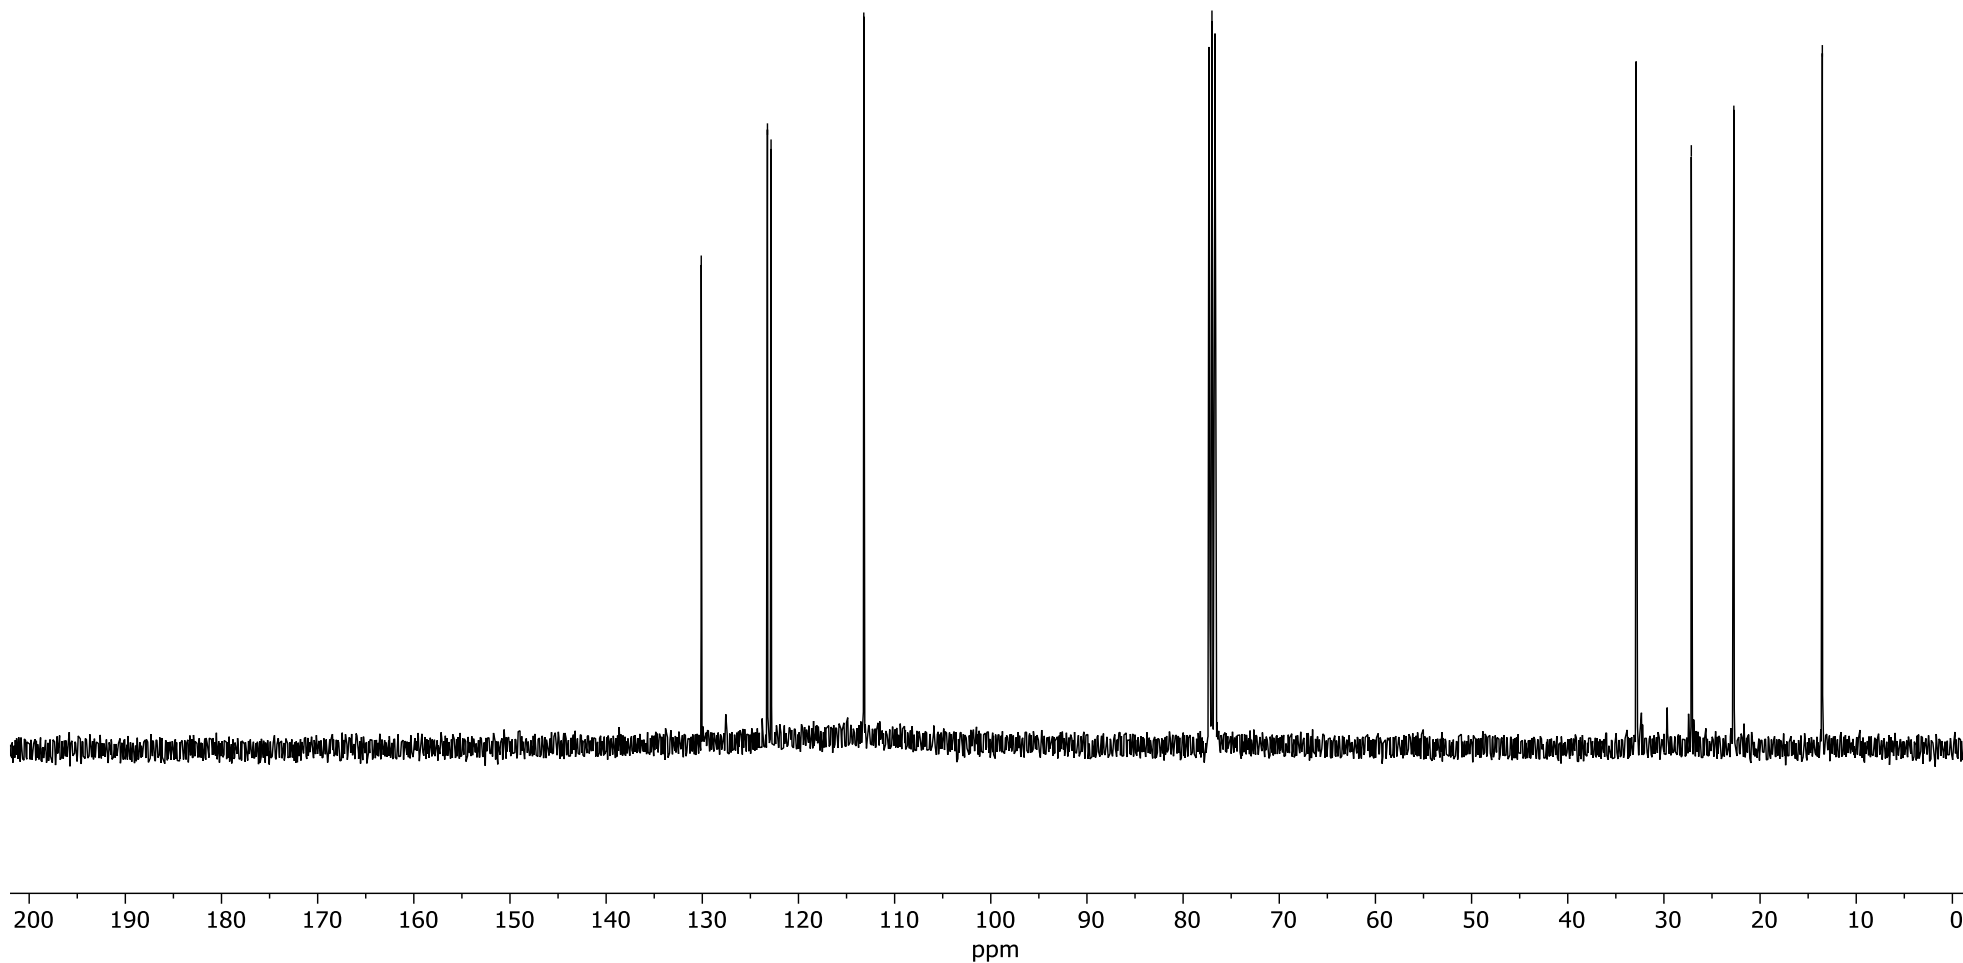

<sup>13</sup>C NMR spectrum of (Z)-2-(butylselanyl)ethenyl vinyl sulfide (2d)

<sup>77</sup>Se

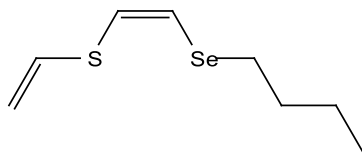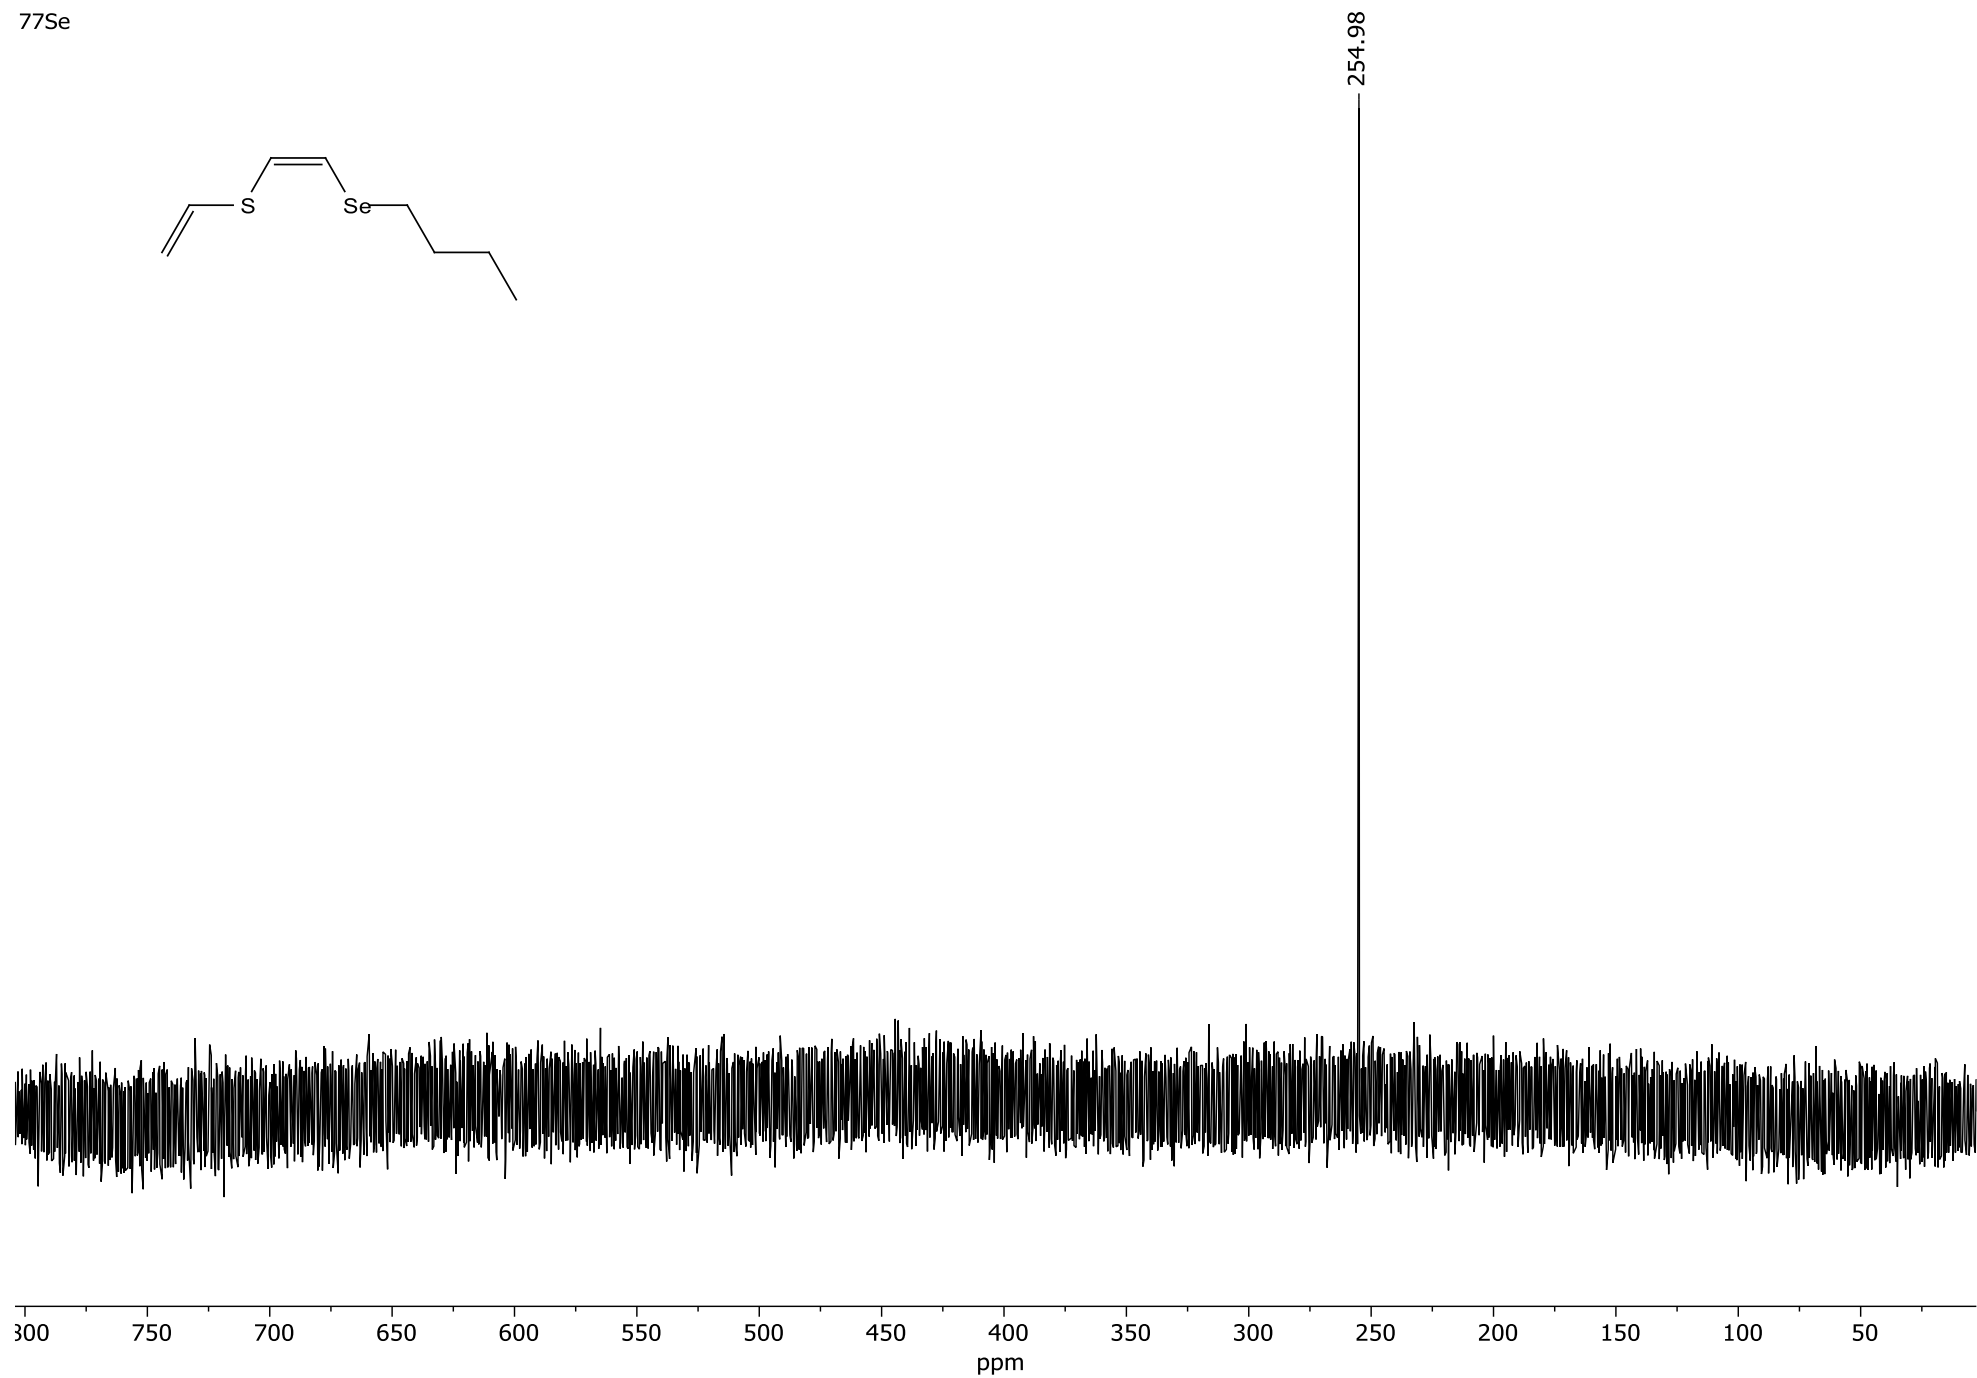

<sup>77</sup>Se NMR spectrum of (Z)-2-(butylselanyl)ethenyl vinyl sulfide (2d)

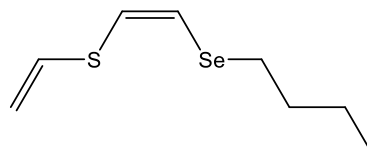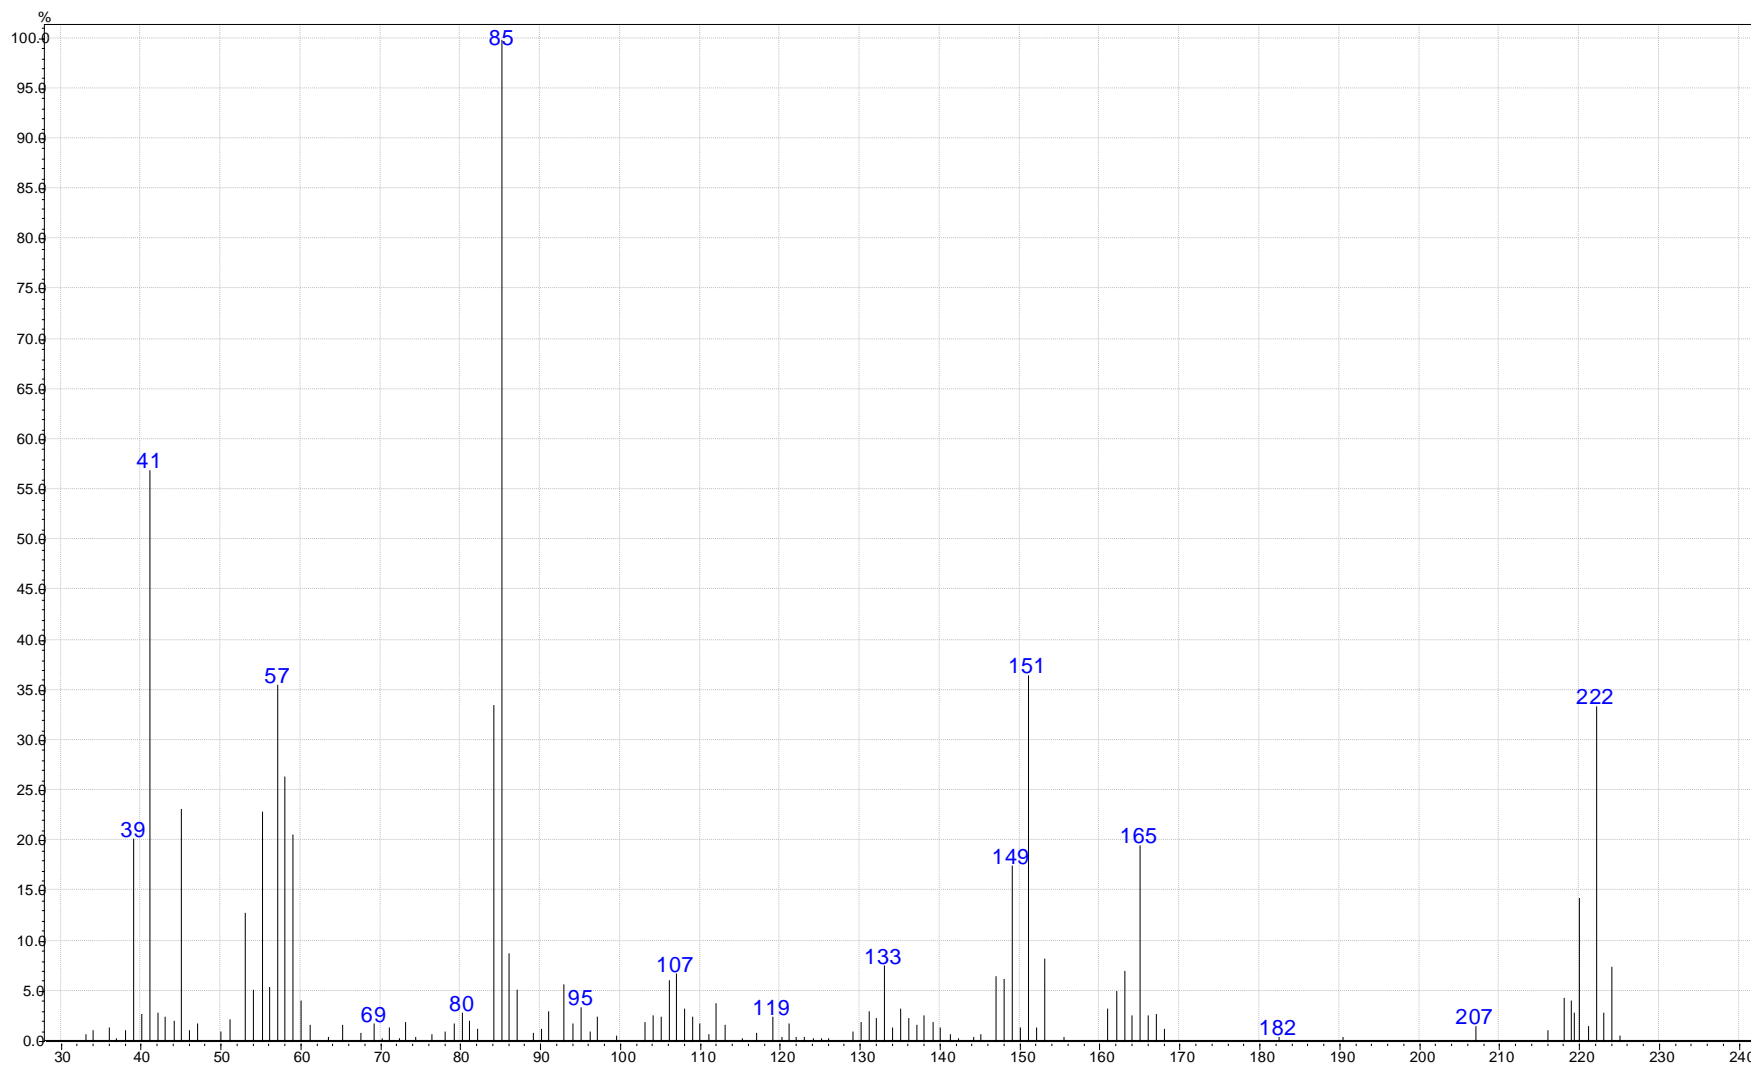

Mass-spectrum of (Z)-2-(butylselanyl)ethenyl vinyl sulfide (2d)

<sup>1</sup>H

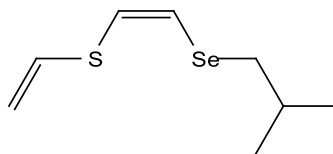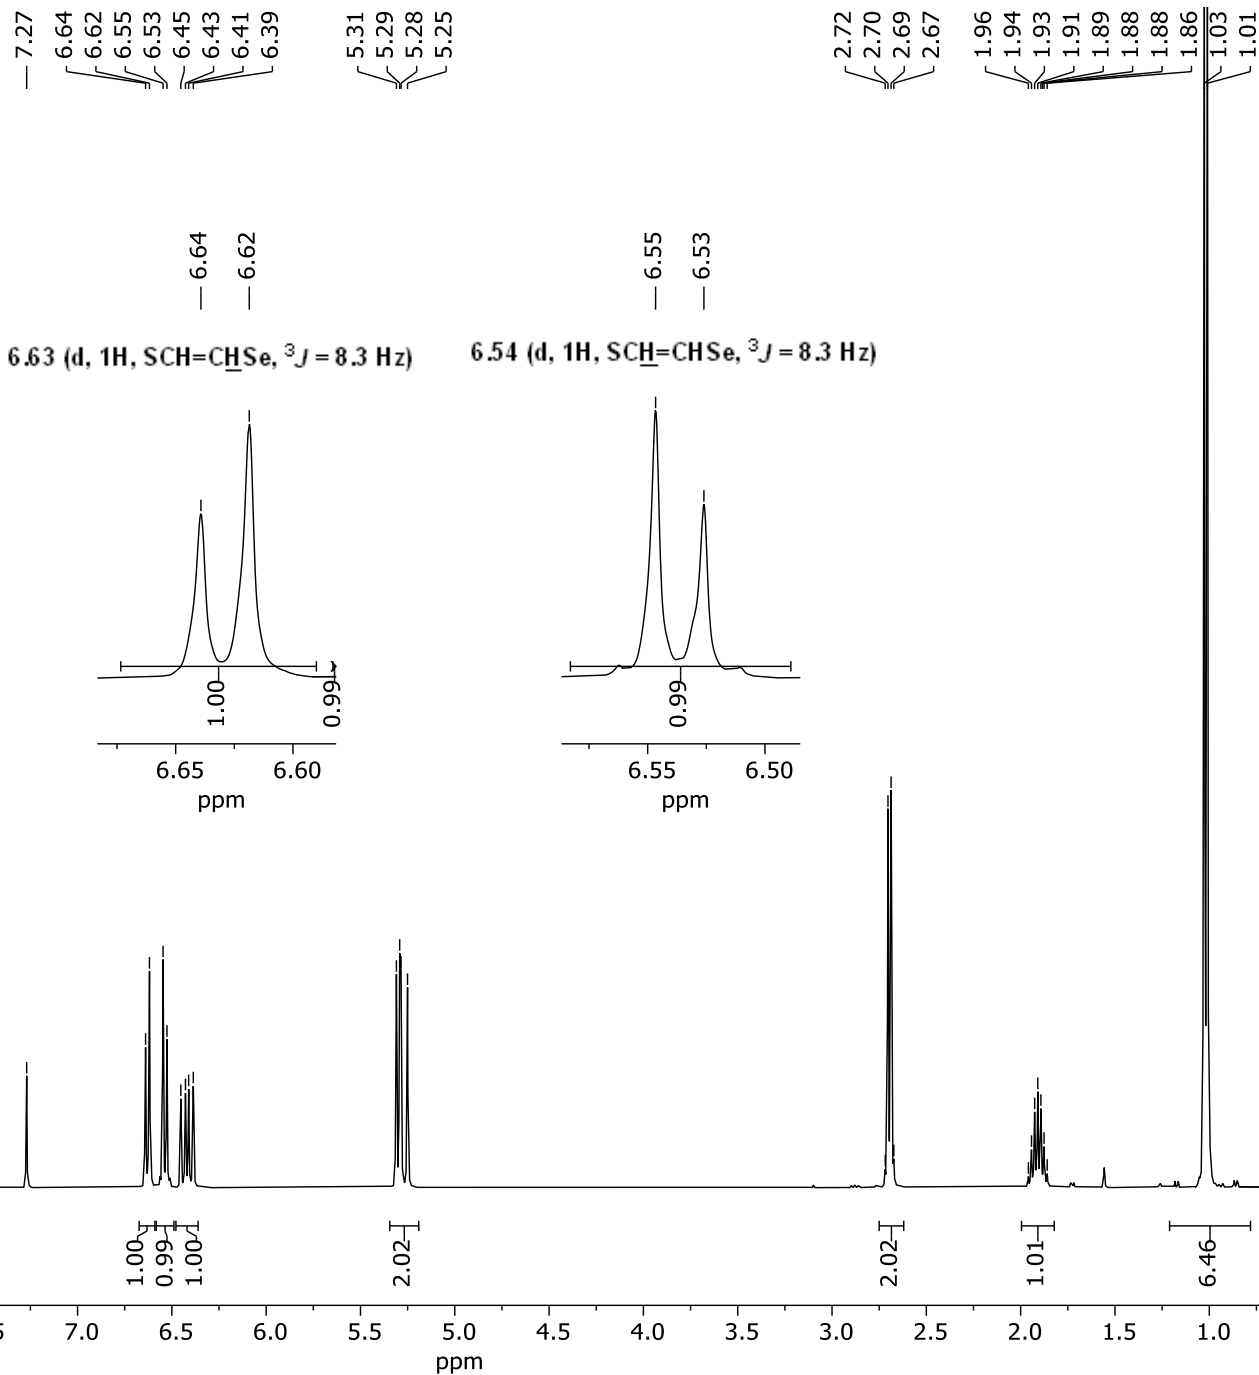

<sup>1</sup>H NMR spectrum of (Z)-2-(isobutylselanyl)ethenyl vinyl sulfide (2e)



<sup>13</sup>C

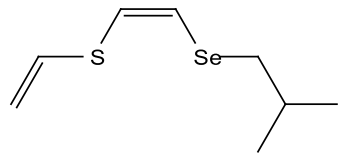

— 124.58  
— 124.03  
— 123.48

~ 130.13  
/ 124.03  
\ 122.33

— 113.16

— 77.00

— 37.39

— 29.59

— 22.38

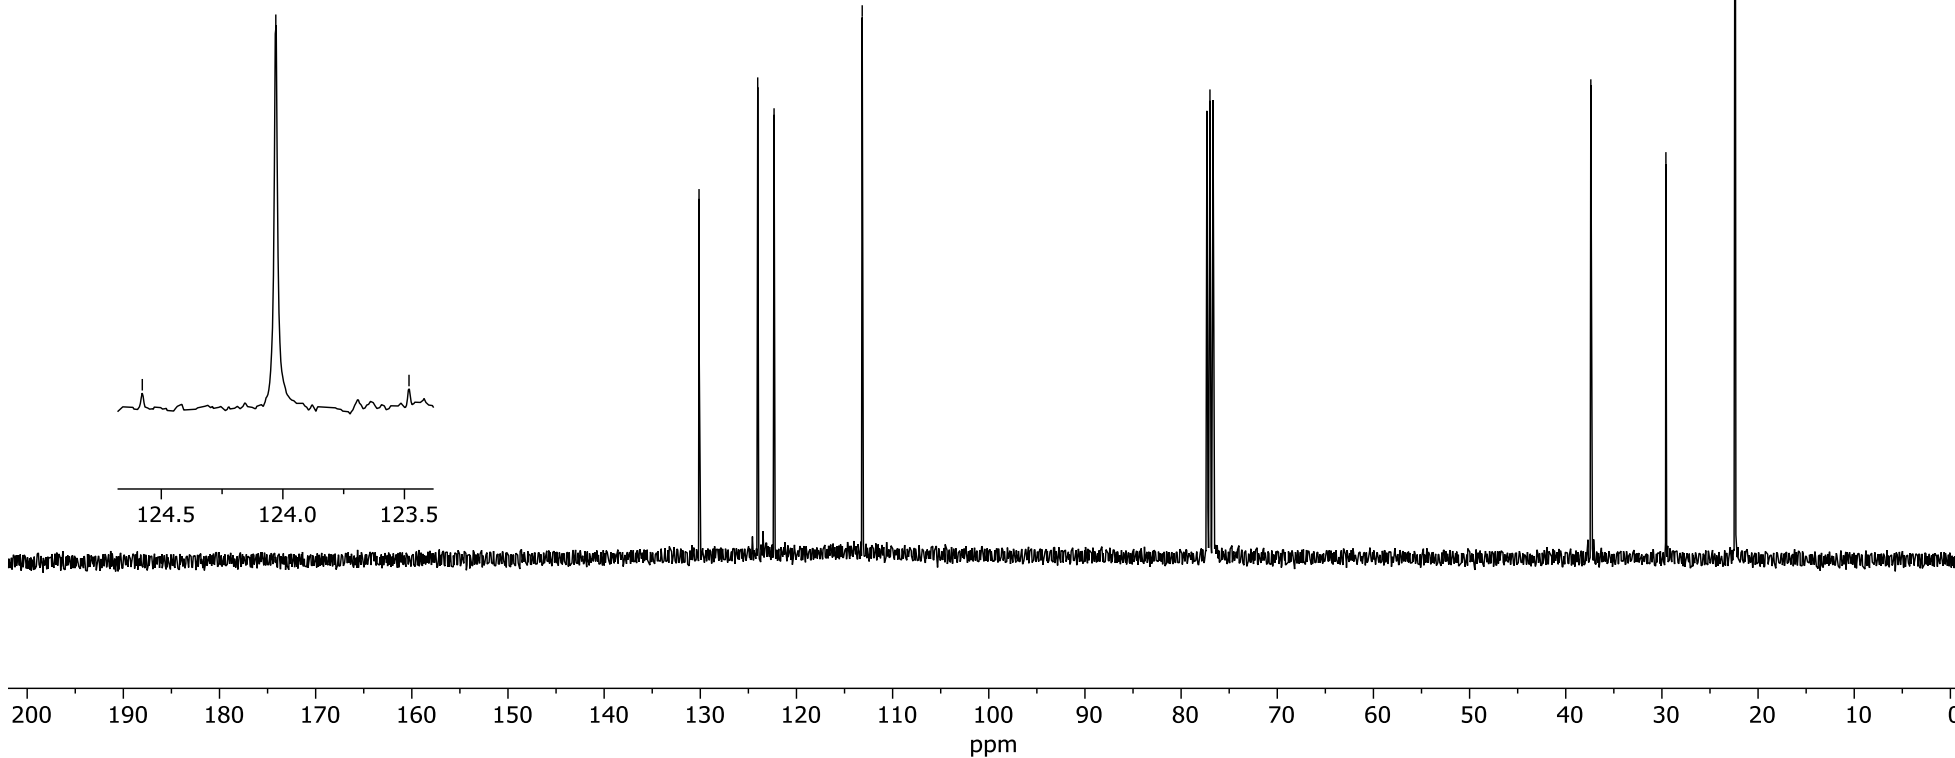

<sup>13</sup>C NMR spectrum of (Z)-2-(isobutylselanyl)ethenyl vinyl sulfide (2e)

<sup>77</sup>Se

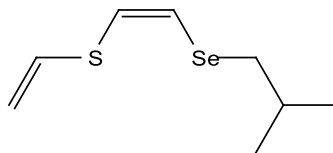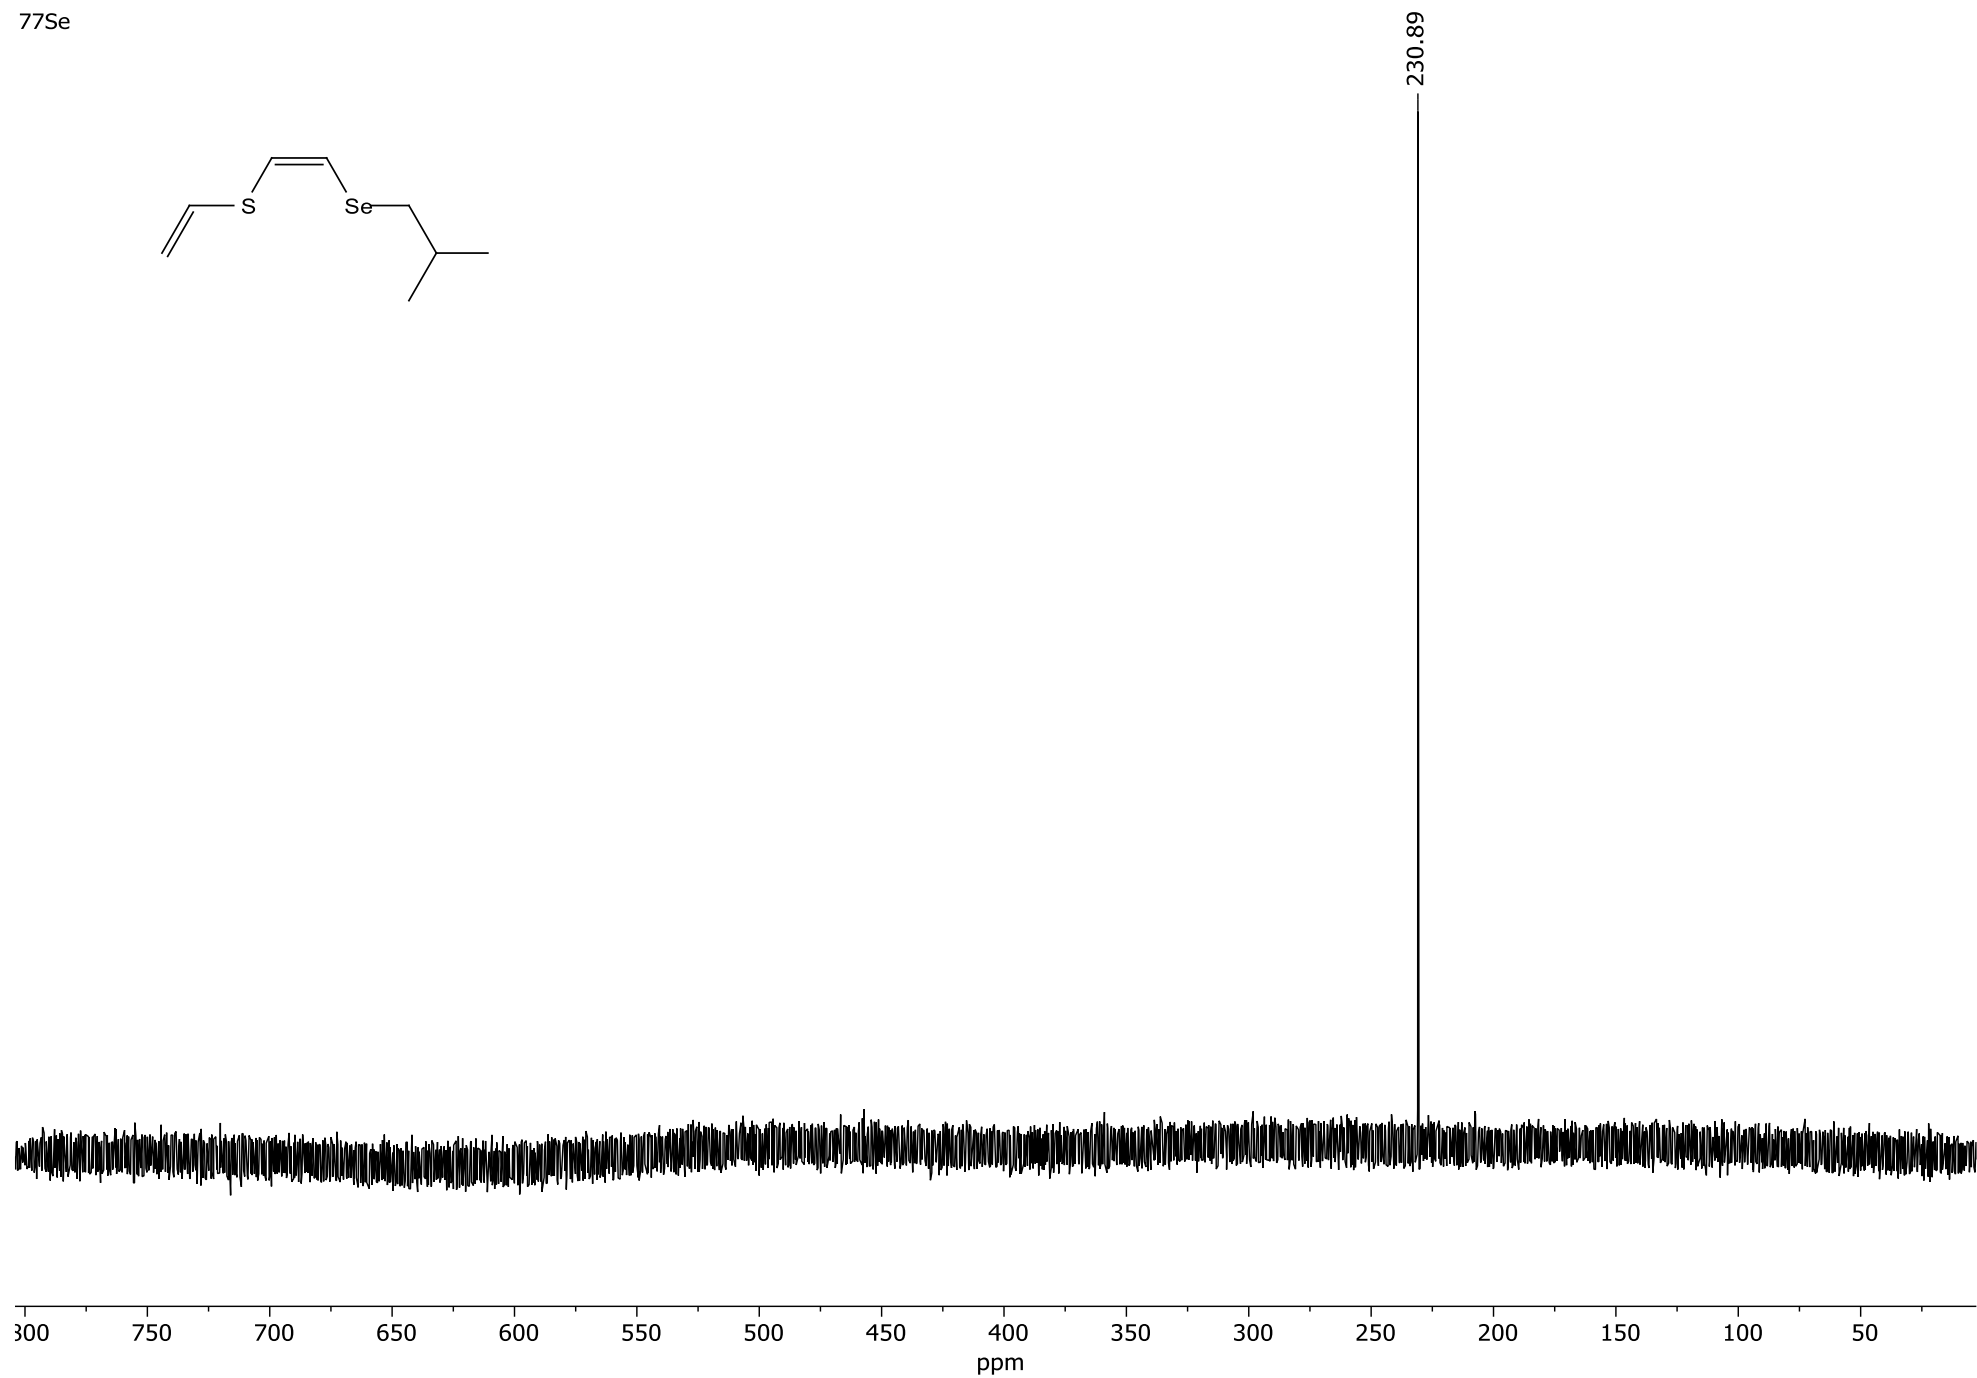

<sup>77</sup>Se NMR spectrum of (Z)-2-(isobutylselanyl)ethenyl vinyl sulfide (2e)

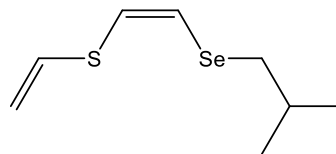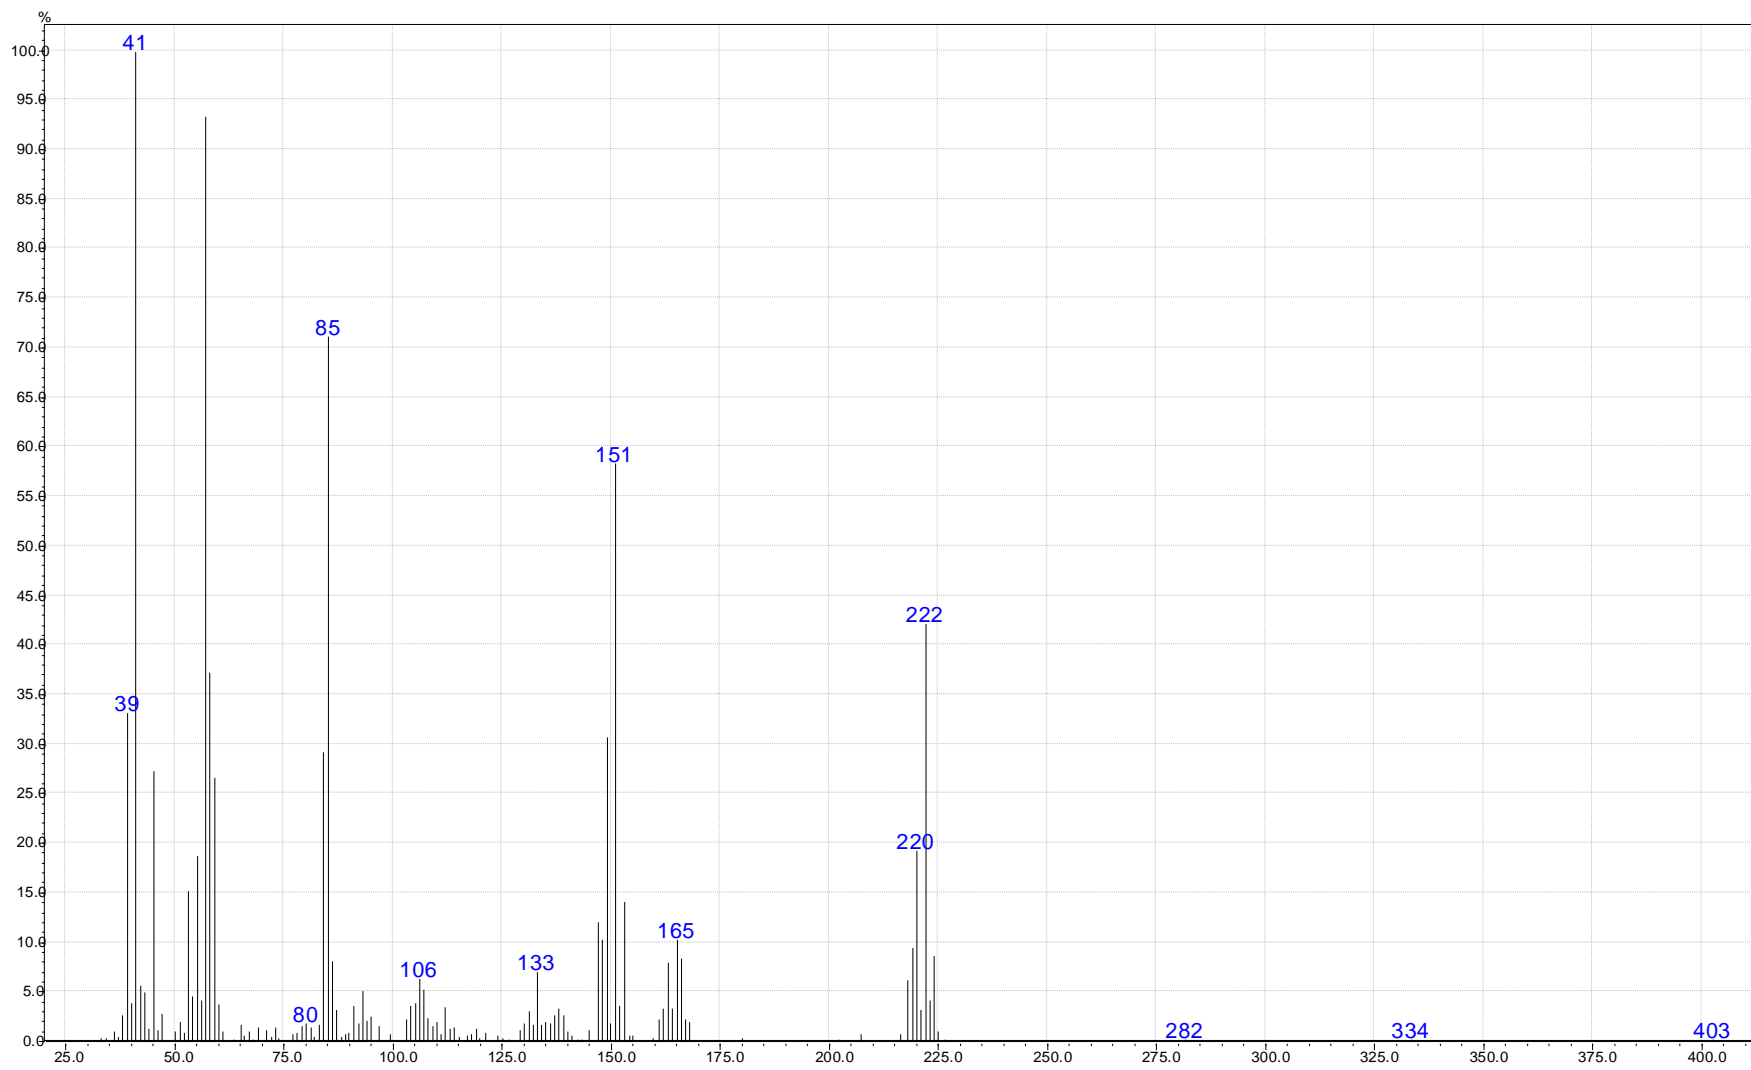

Mass-spectrum of (Z)-2-(isobutylselanyl)ethenyl vinyl sulfide (2e)

<sup>1</sup>H

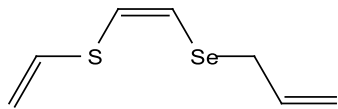

6.60  
6.60

6.60 (d, 1H, SCH=CHSe, <sup>3</sup>J = 8.3 Hz)

6.60 (d, 1H, SCH=CHSe, <sup>3</sup>J = 8.3 Hz)

7.27  
6.60  
6.60  
6.45  
6.43  
6.41  
6.38  
5.97  
5.95  
5.93  
5.91  
5.32  
5.30  
5.30  
5.26  
5.14  
5.14  
5.10  
5.09  
5.08  
5.07  
5.05  
5.05  
3.39  
3.37

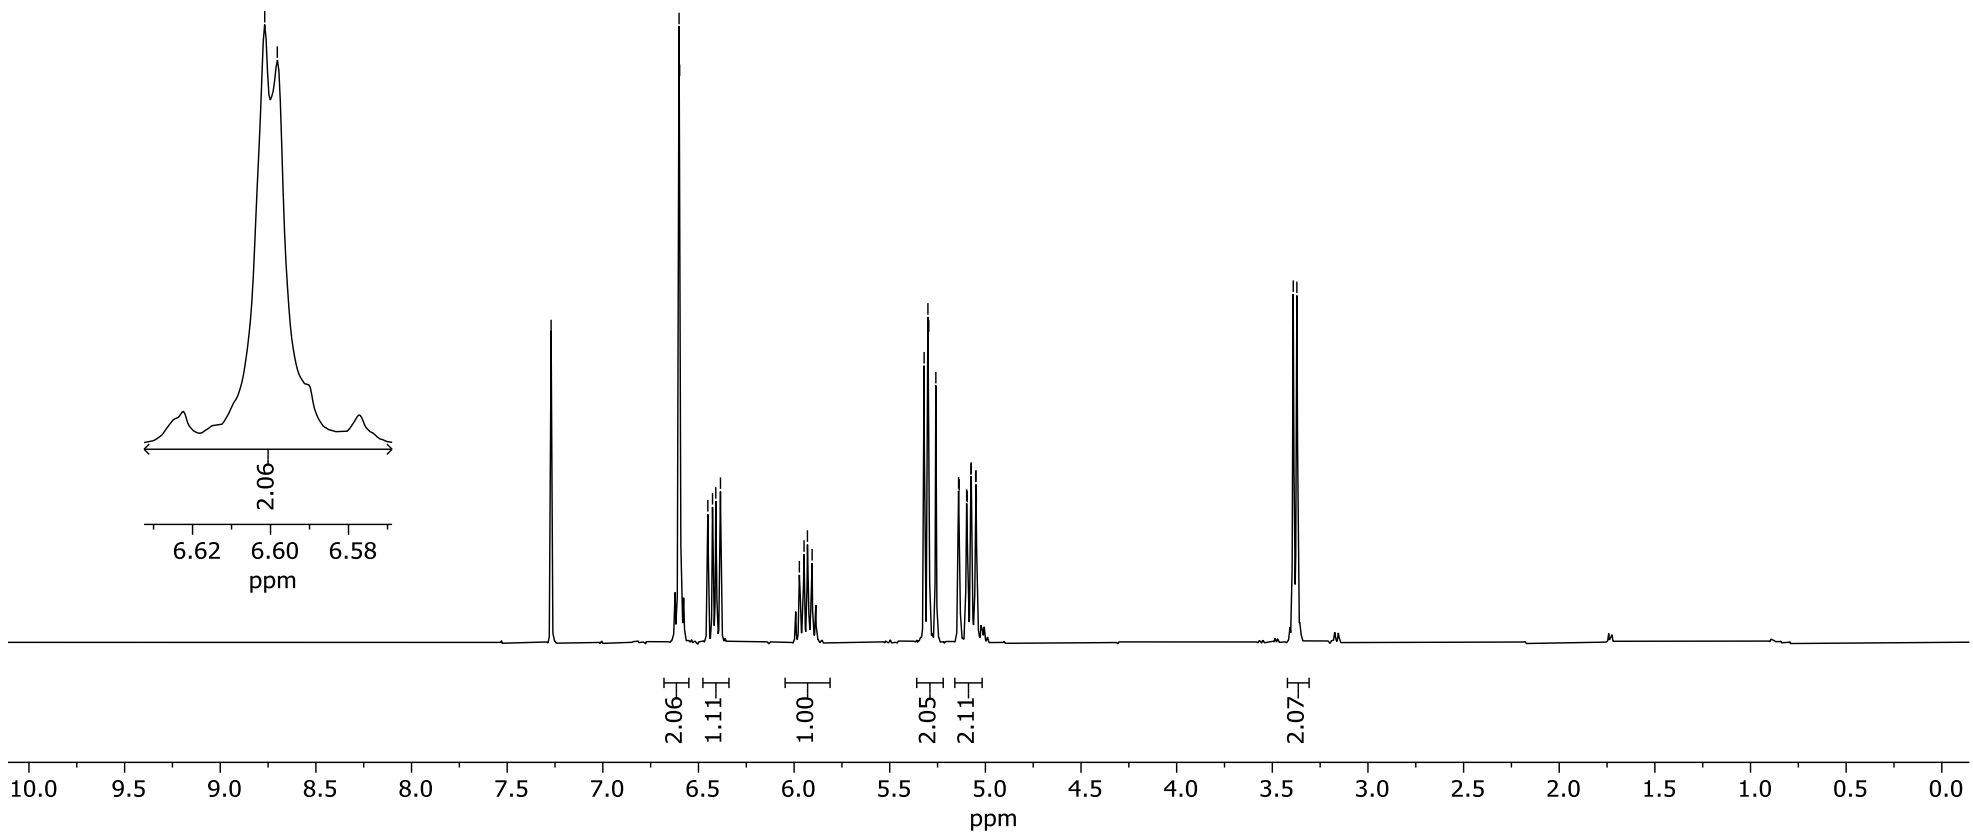

<sup>1</sup>H NMR spectrum of (Z)-2-(allylselanyl)ethenyl vinyl sulfide (2f)

13C

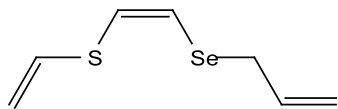

— 134.45  
— 130.05  
~ 123.51  
~ 122.38  
— 117.09  
~ 113.39

— 122.93  
— 122.38  
— 121.84

77.00

— 29.05

123.0 122.5 122.0  
ppm

190 180 170 160 150 140 130 120 110 100 90 80 70 60 50 40 30 20 10

ppm

<sup>13</sup>C NMR spectrum of (Z)-2-(allylselanyl)ethenyl vinyl sulfide (2f)

$^{77}\text{Se}$

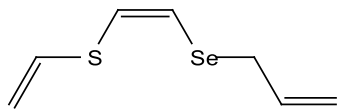

— 273.90

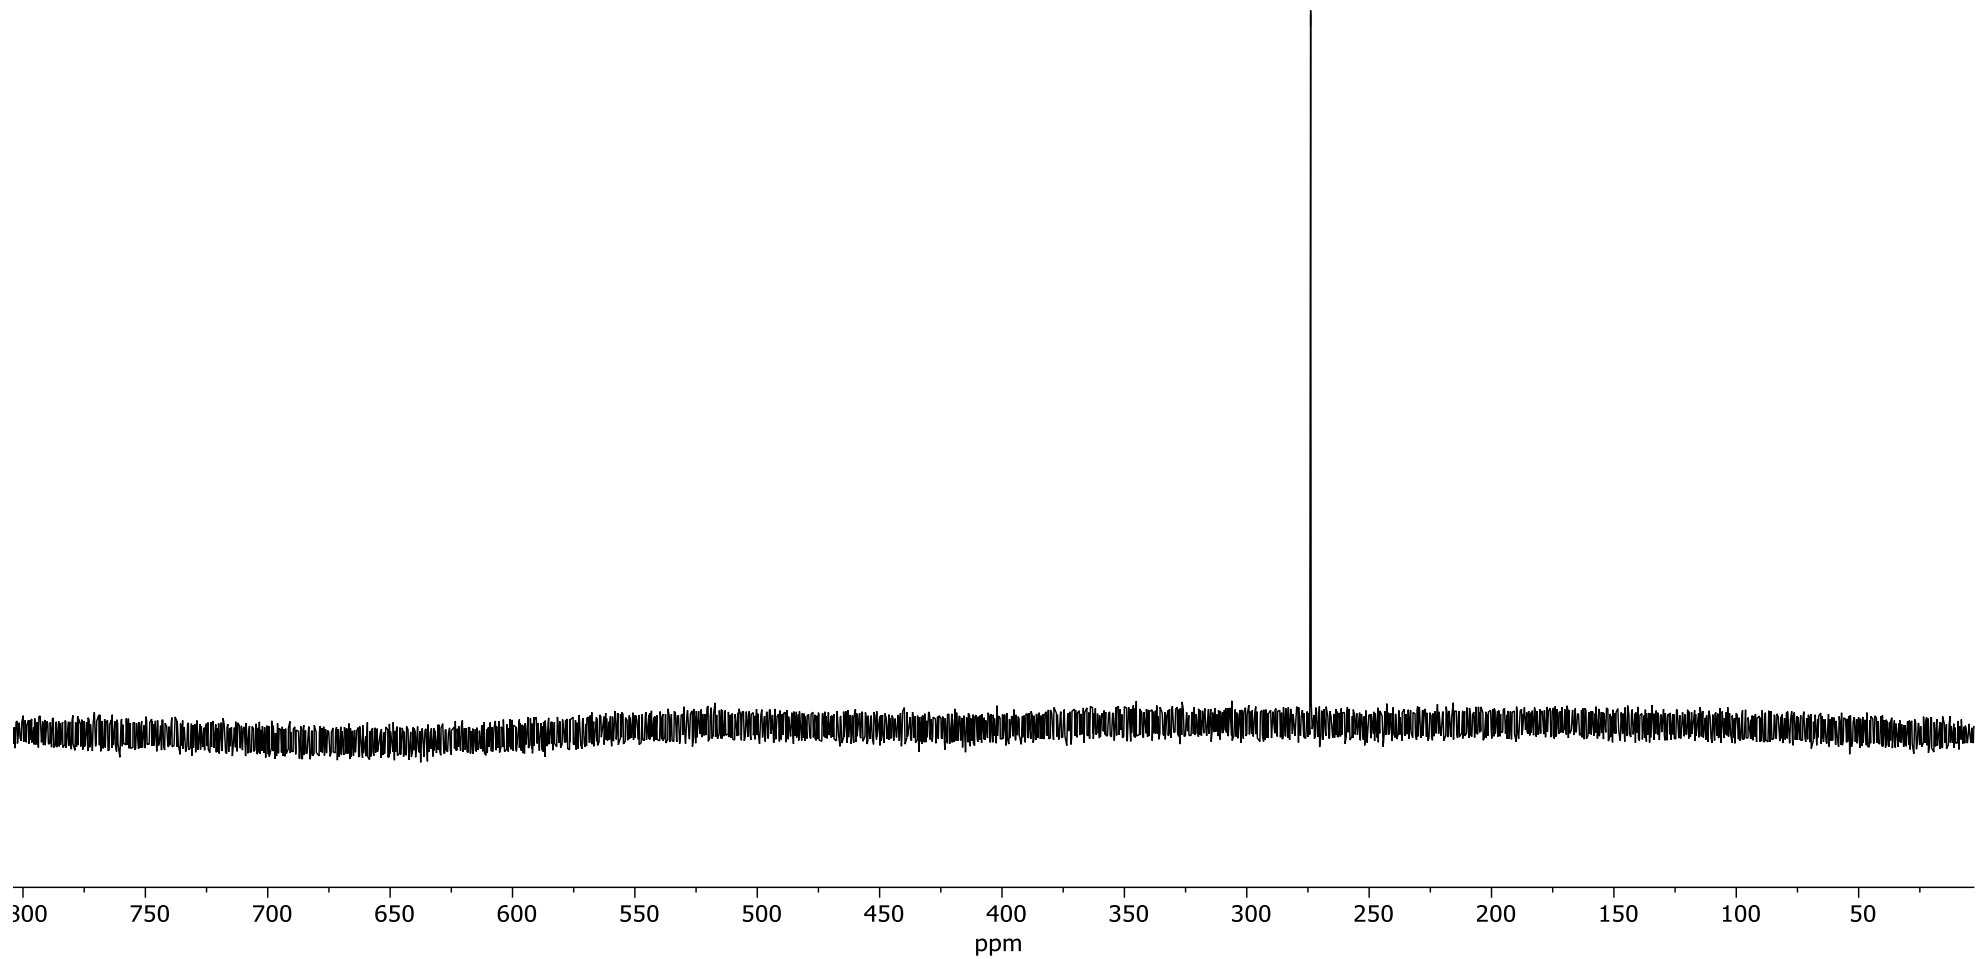

$^{77}\text{Se}$  NMR spectrum of (Z)-2-(allylselanyl)ethenyl vinyl sulfide (2f)

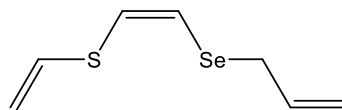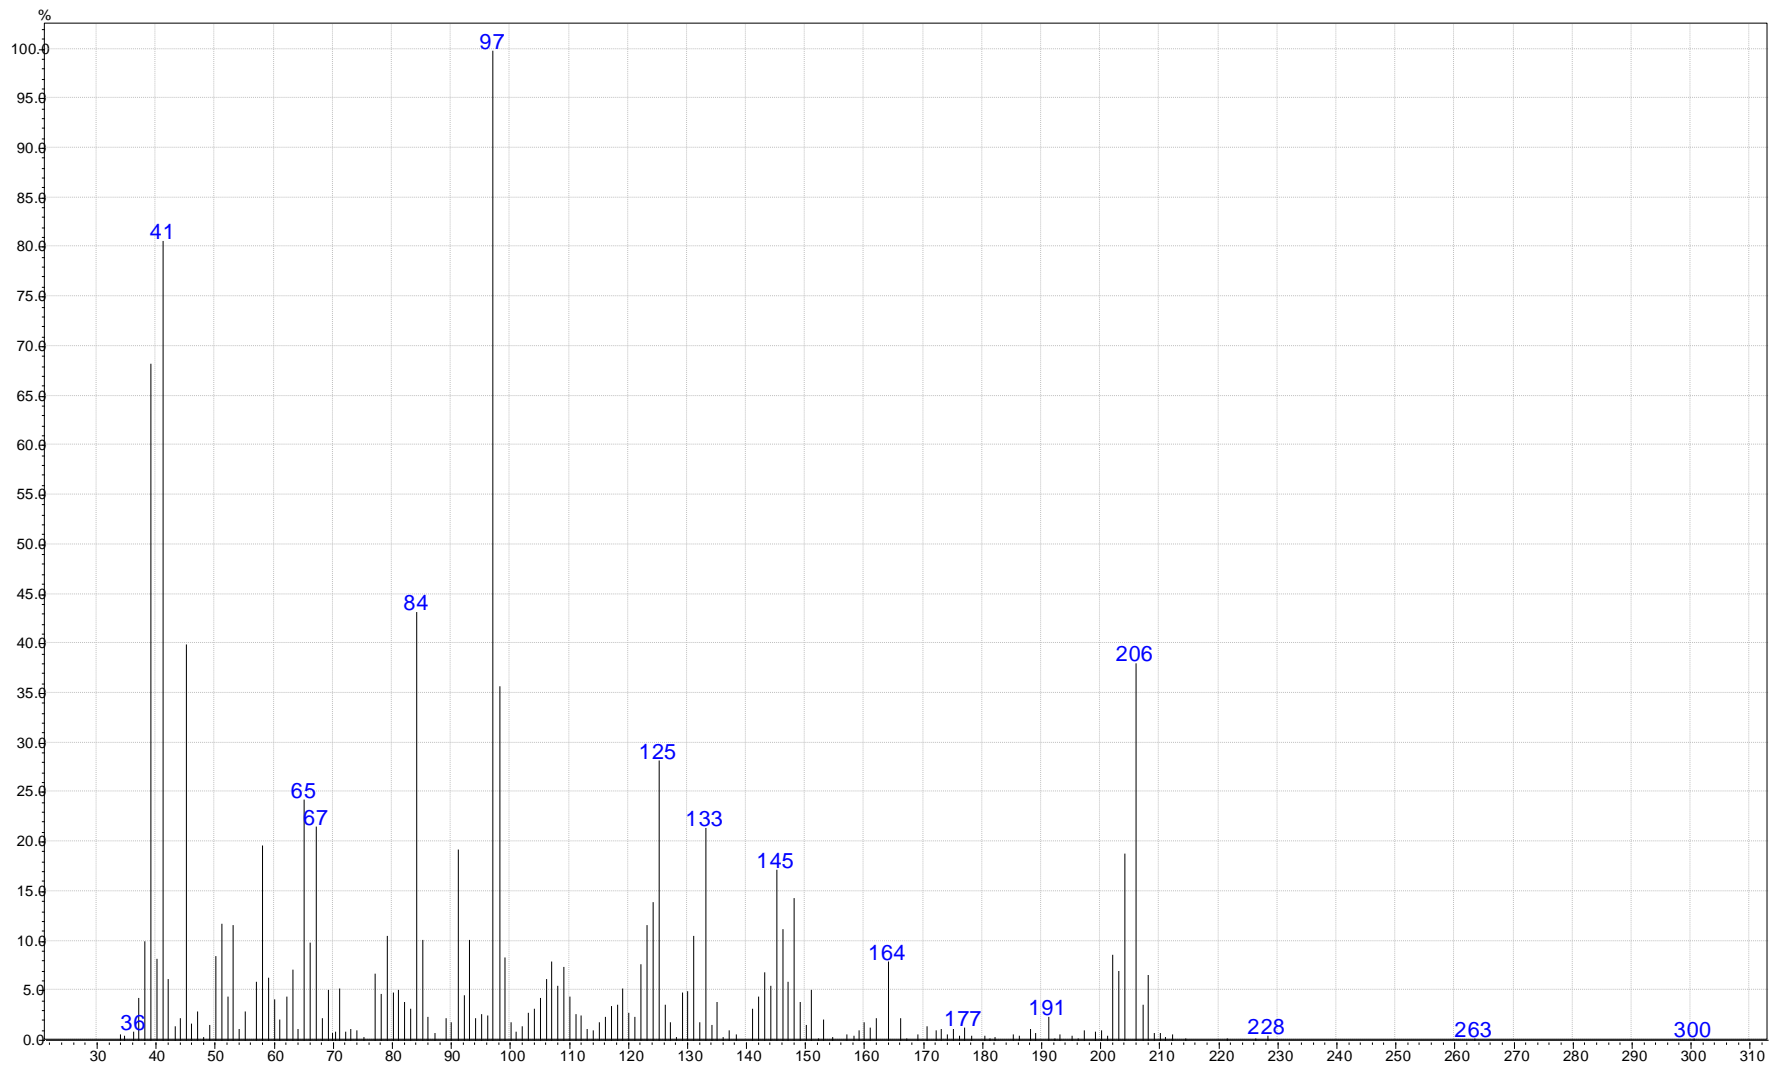

Mass-spectrum of (Z)-2-(allylselanyl)ethenyl vinyl sulfide (2f)

<sup>1</sup>H

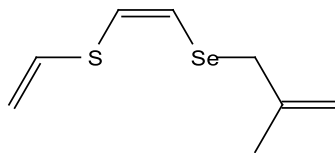

6.61  
6.59  
6.58  
6.55

6.60 (d, 1H, SCH=CHSe, <sup>3</sup>J = 8.3 Hz)

6.57 (d, 1H, SCH=CHSe, <sup>3</sup>J = 8.3 Hz)

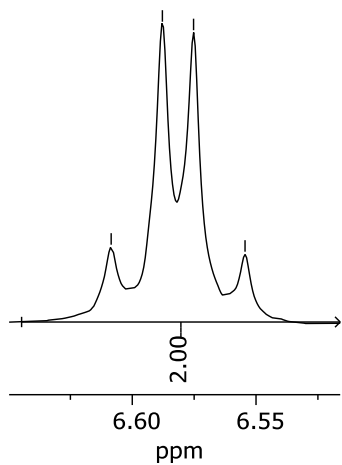

7.27  
6.61  
6.59  
6.58  
6.55  
6.45  
6.42  
6.41  
6.38

5.31  
5.29  
5.25  
4.89  
4.85

3.37

1.86

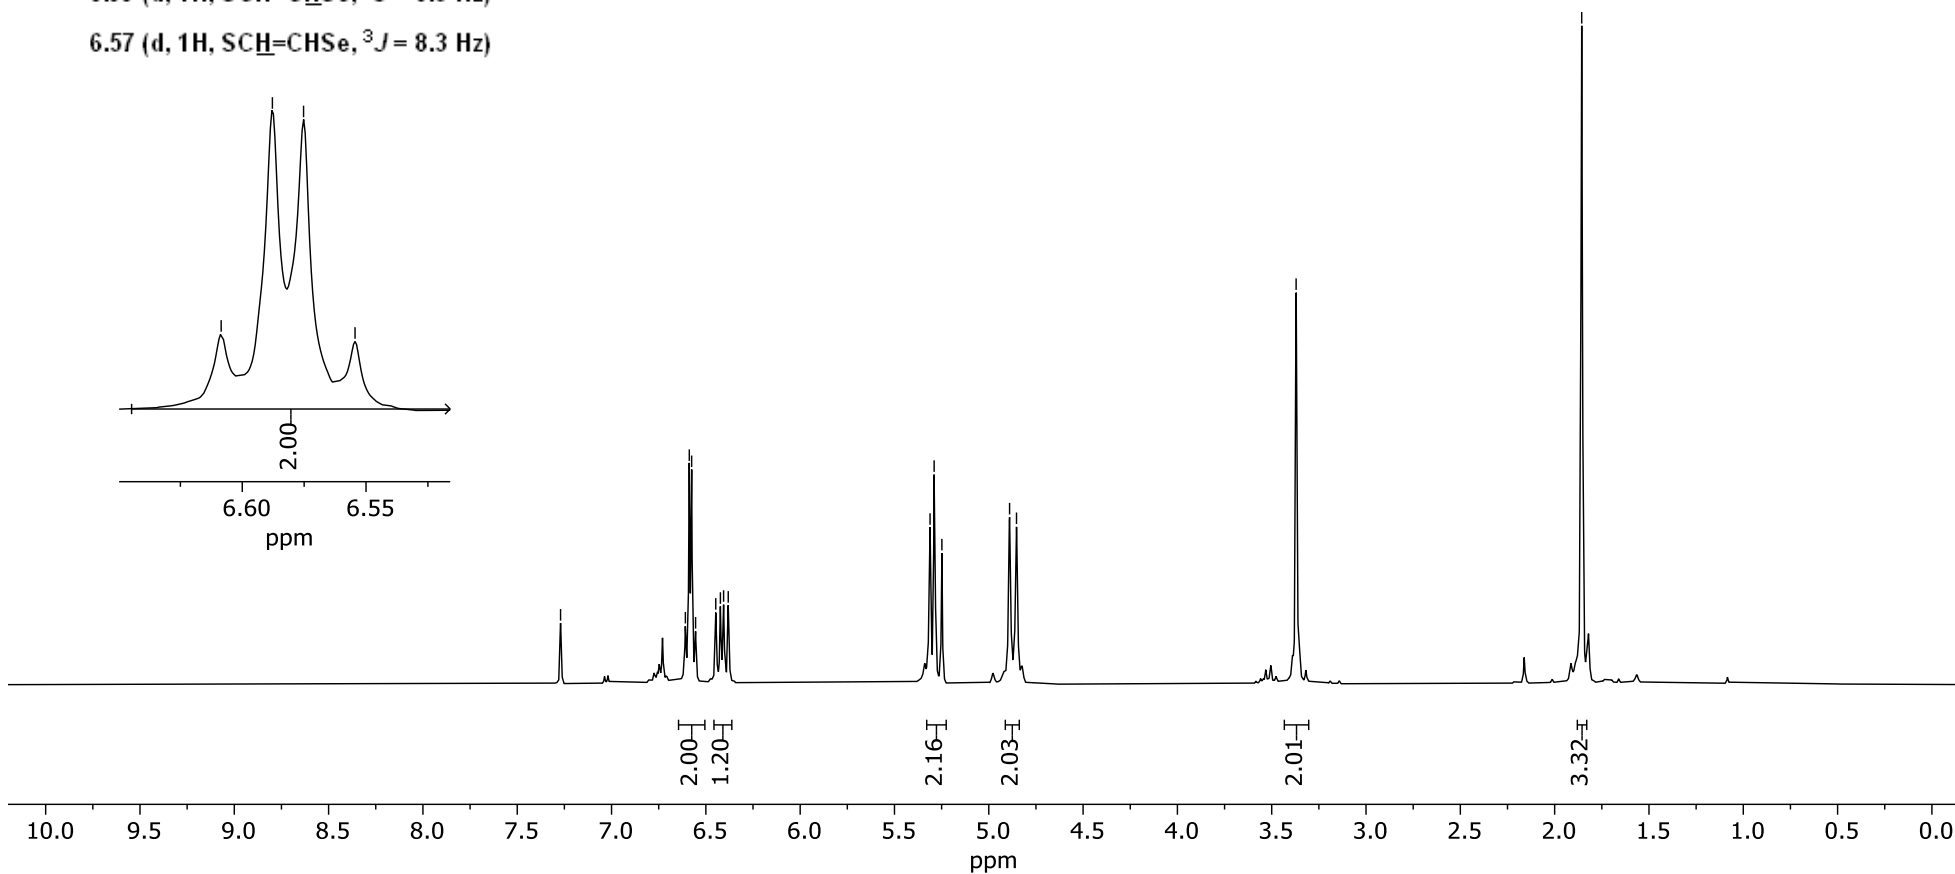

<sup>1</sup>H NMR spectrum of (Z)-2-[(2-methyl-2-propenyl)selanyl]ethenyl vinyl sulfide (2g)



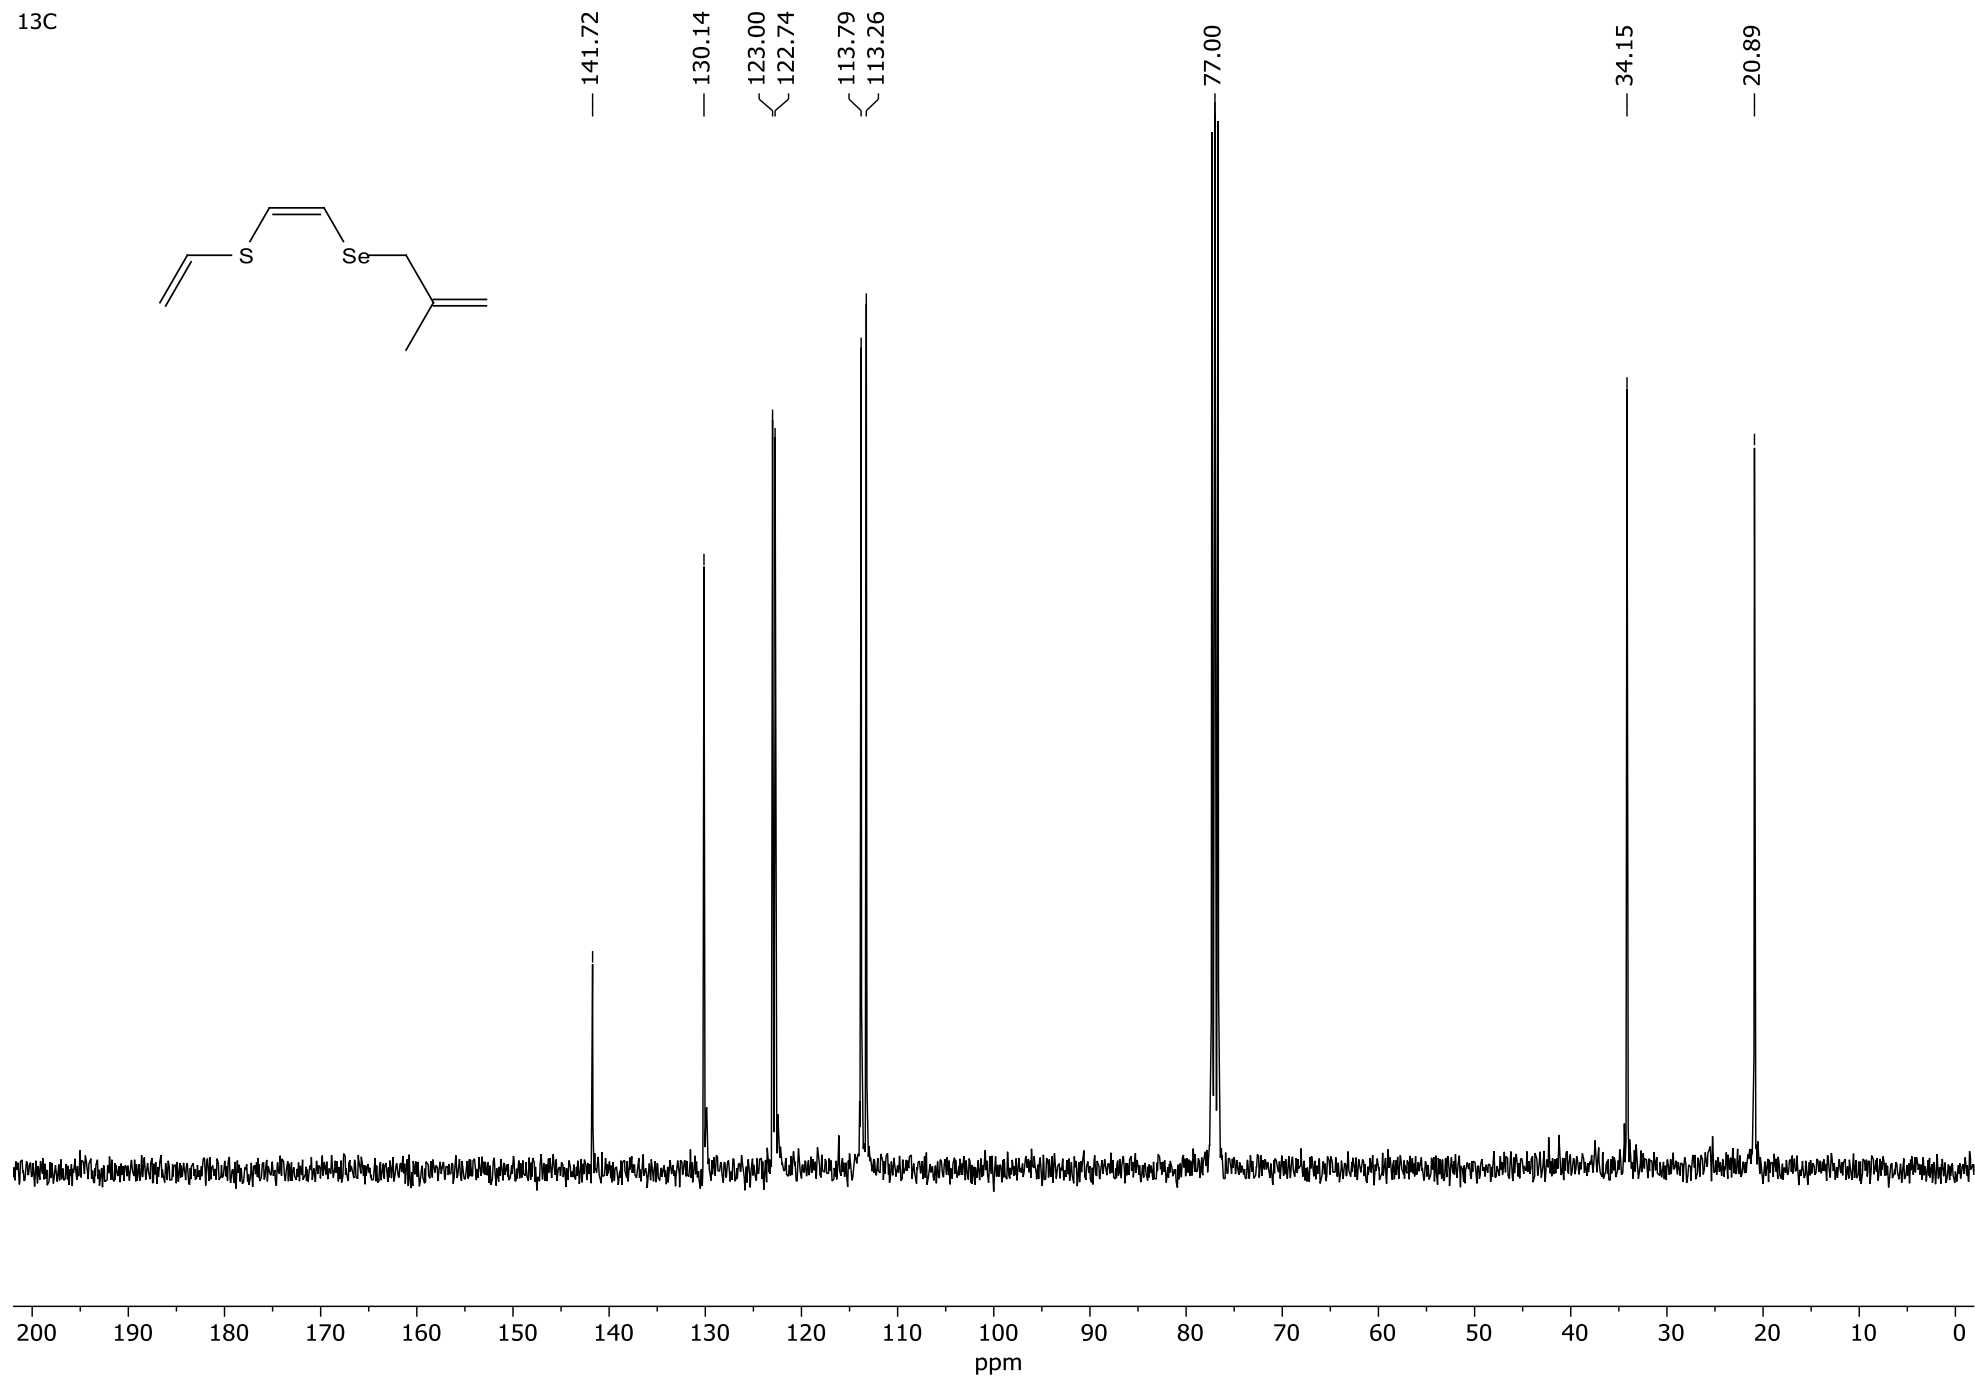

$^{13}\text{C}$  NMR spectrum of (Z)-2-[(2-methyl-2-propenyl)selanyl]ethenyl vinyl sulfide (2g)

<sup>77</sup>Se

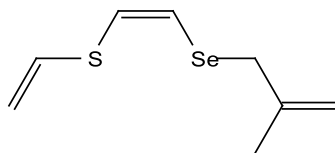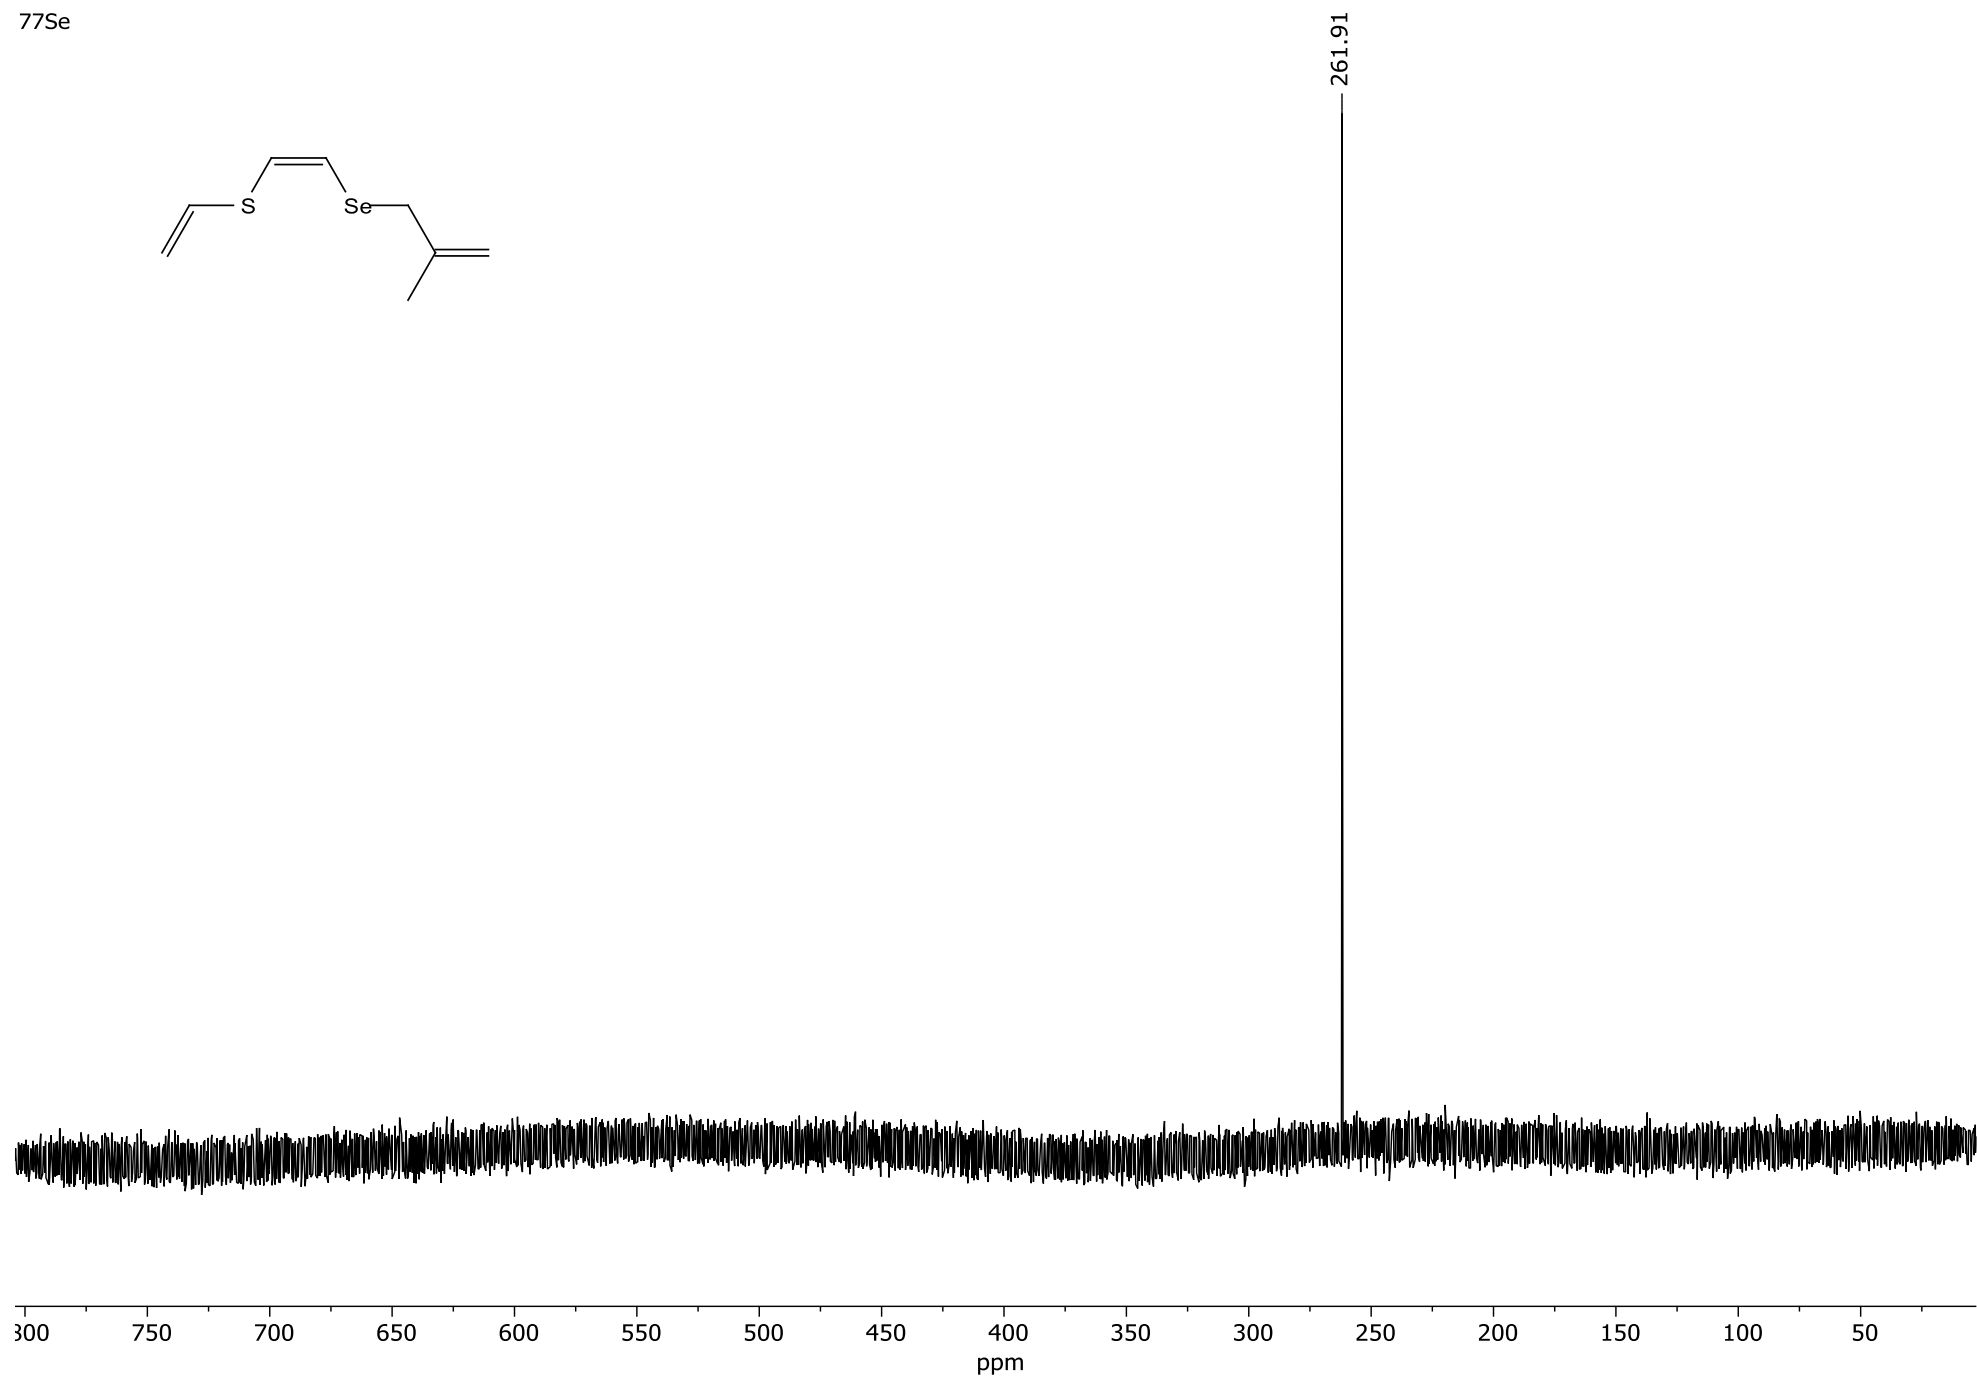

<sup>77</sup>Se NMR spectrum of (Z)-2-[(2-methyl-2-propenyl)selenyl]ethenyl vinyl sulfide (2g)

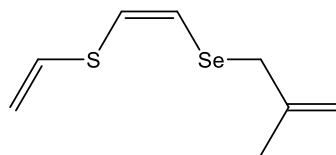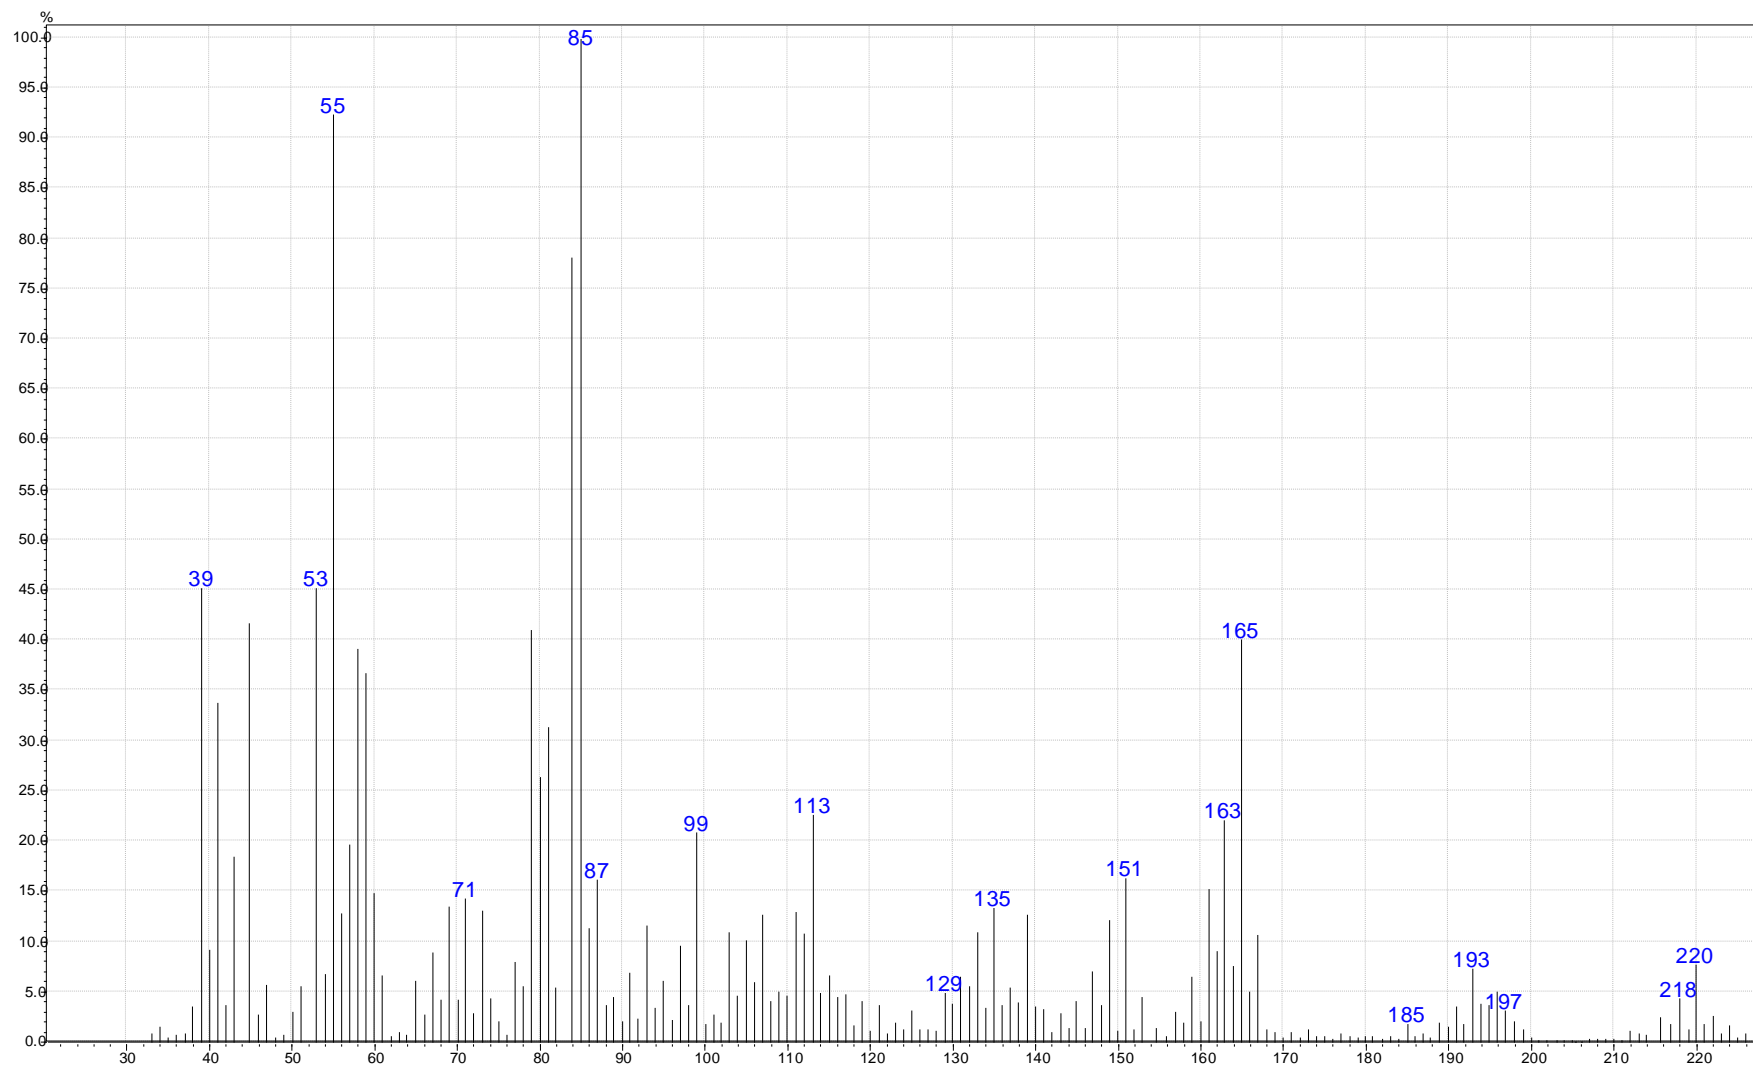

Mass-spectrum of (Z)-2-[(2-methyl-2-propenyl)selenyl]ethenyl vinyl sulfide (2g)

<sup>1</sup>H

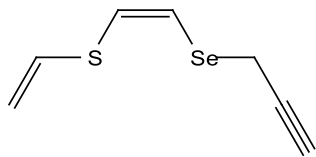

6.86  
6.84

7.27  
6.86  
6.84  
6.70  
6.67  
6.45  
6.42  
6.41  
6.38  
5.34  
5.31  
5.27

6.70  
6.67

3.38  
3.37

2.31  
2.30  
2.30

6.85 (d, 1H, SCH=CHSe, <sup>3</sup>J = 8.1 Hz)

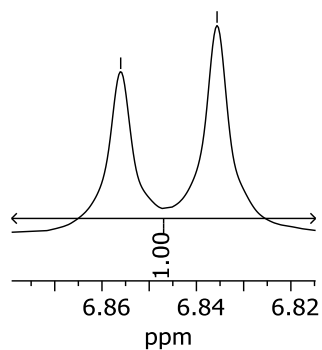

6.69 (d, 1H, SCH=CHSe, <sup>3</sup>J = 8.1 Hz)

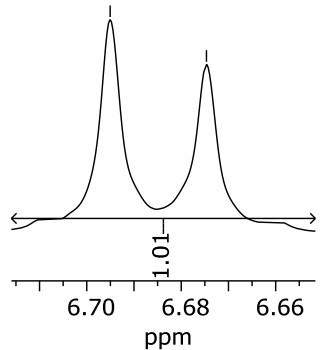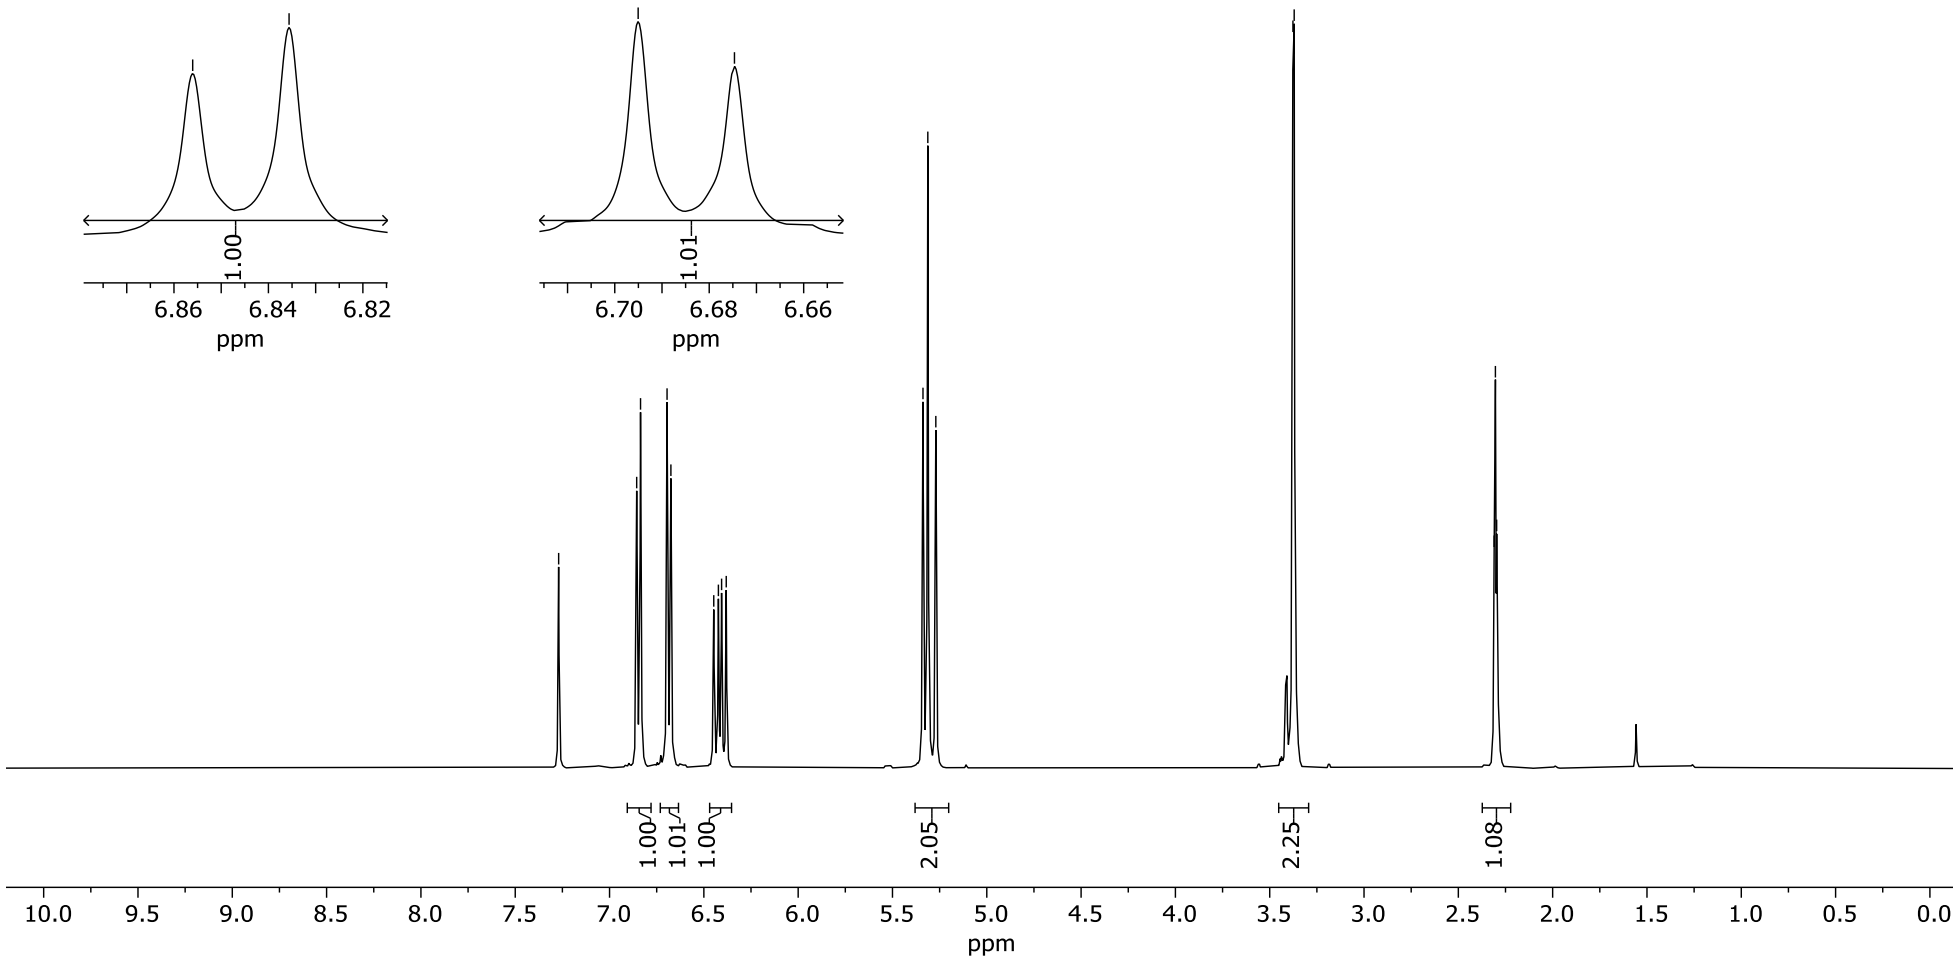

<sup>1</sup>H NMR spectrum of (Z)-2-(propynylselanyl)ethenyl vinyl sulfide (2h)

13C

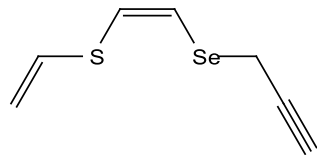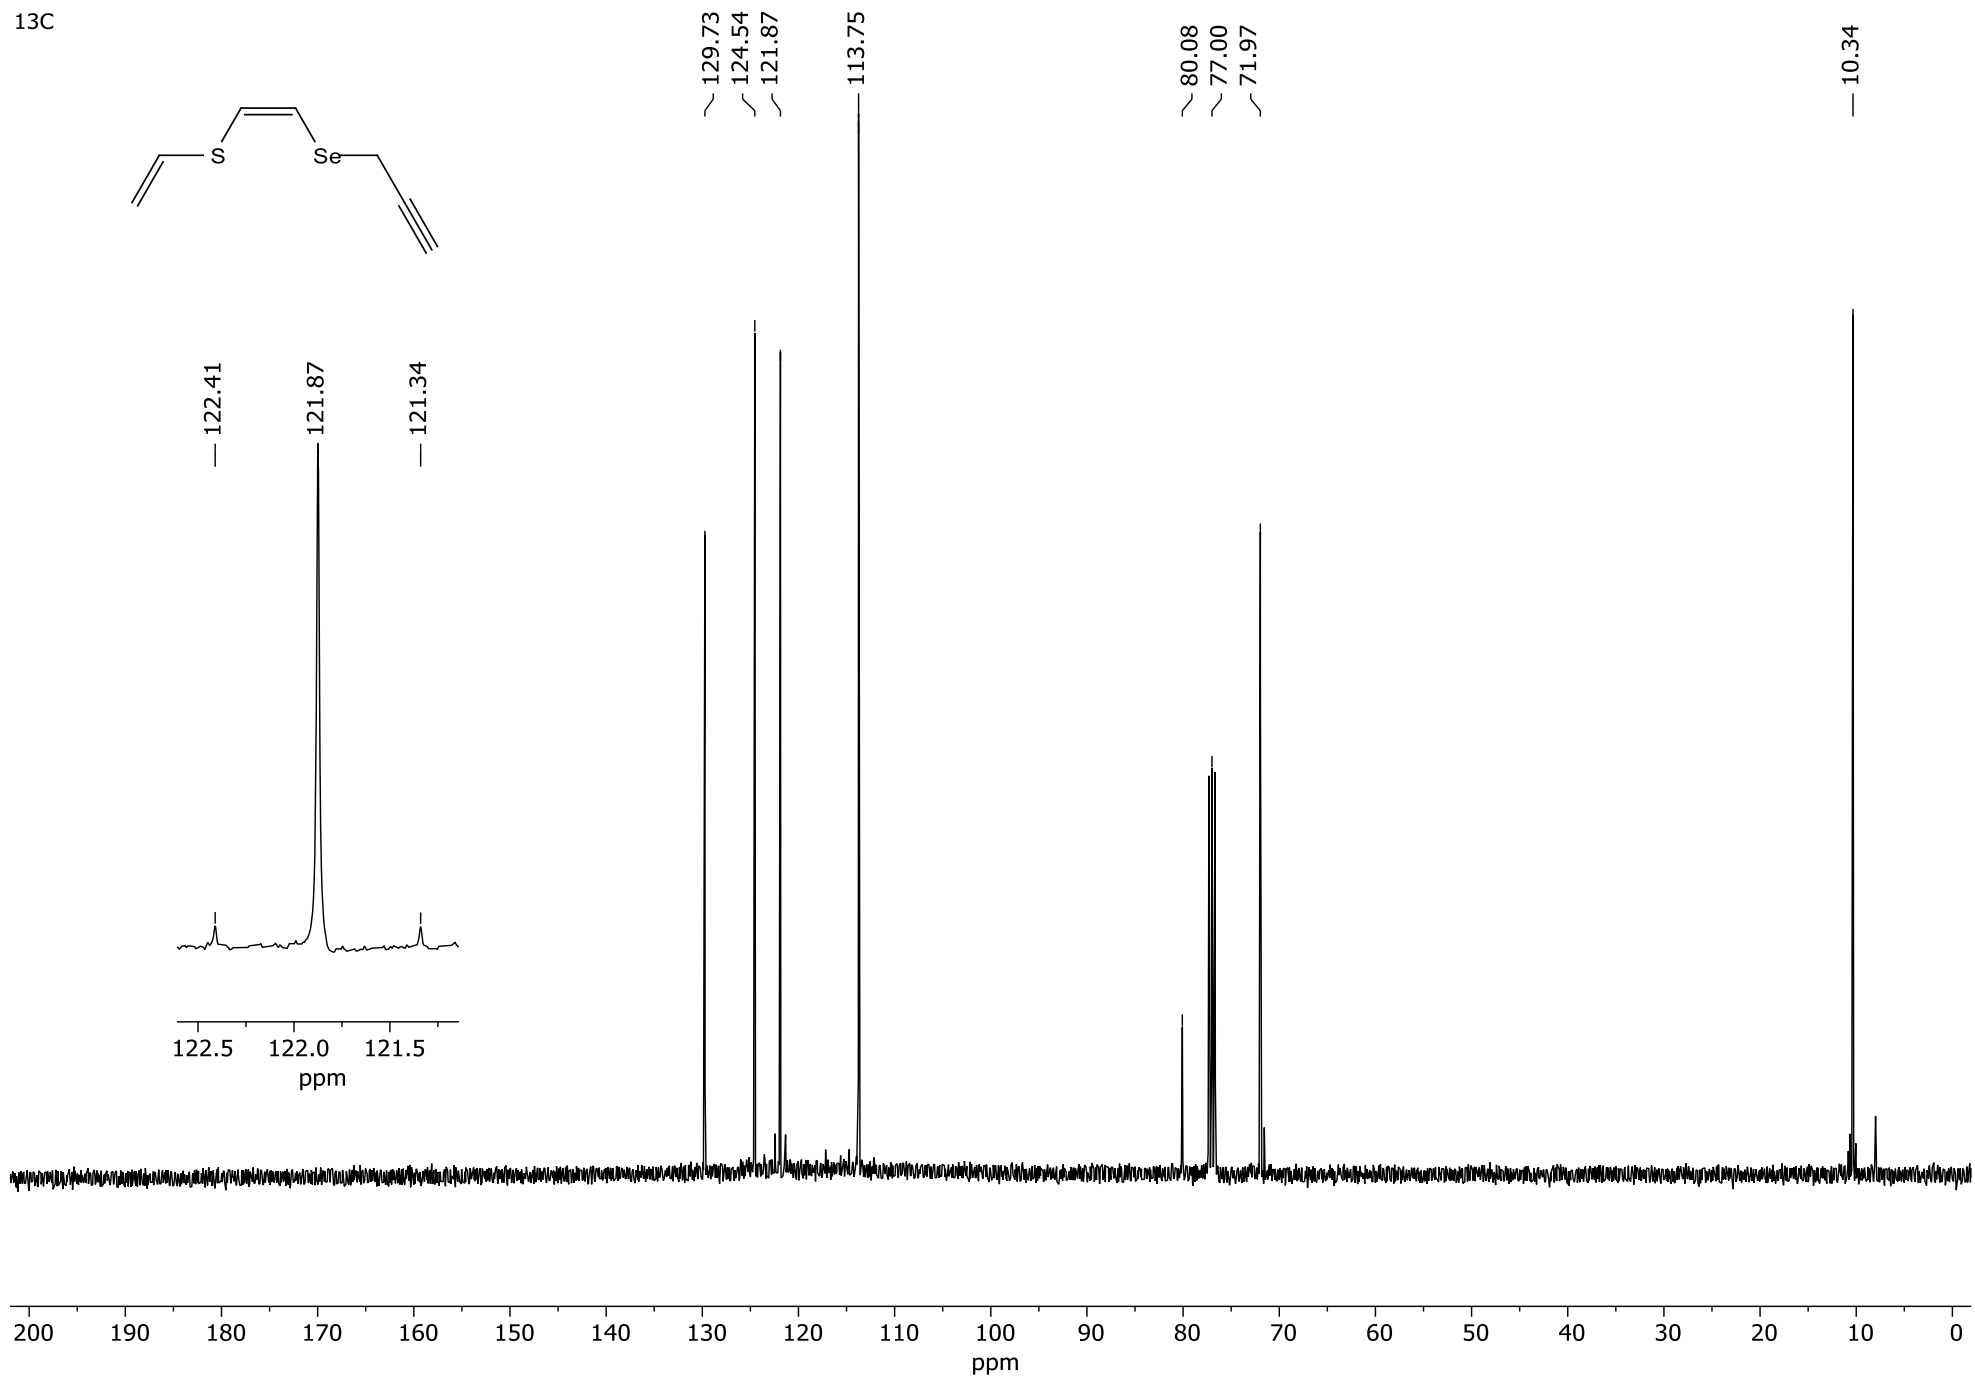

<sup>13</sup>C NMR spectrum of (Z)-2-(propynylselanyl)ethenyl vinyl sulfide (2h)

<sup>77</sup>Se

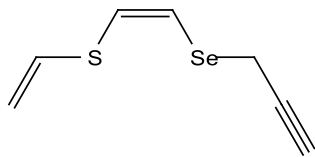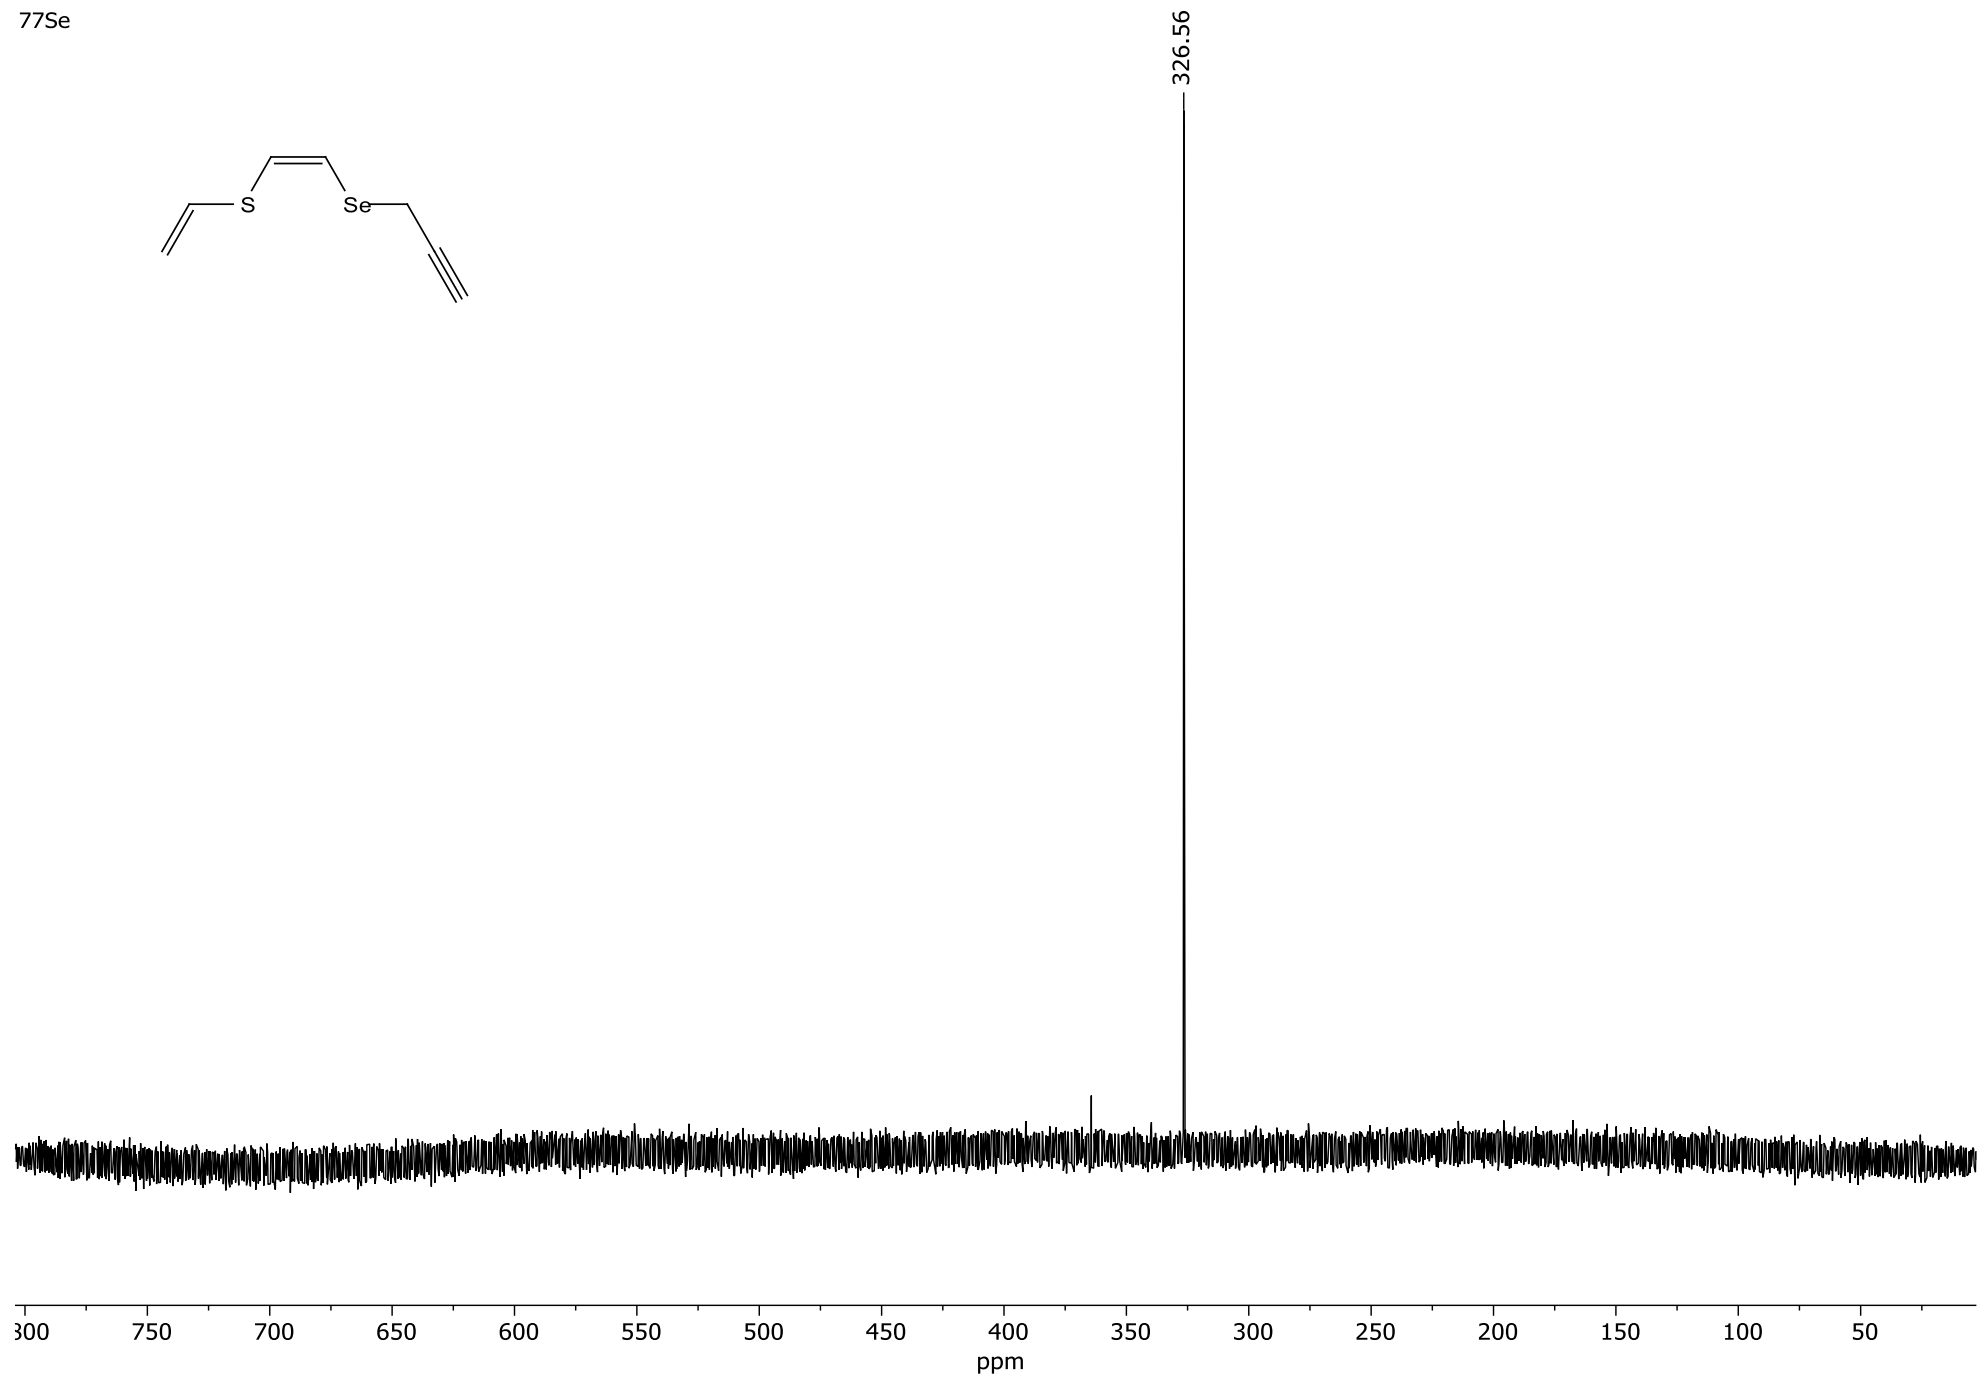

<sup>77</sup>Se NMR spectrum of (Z)-2-(propynylselanyl)ethenyl vinyl sulfide (2h)

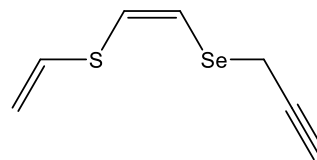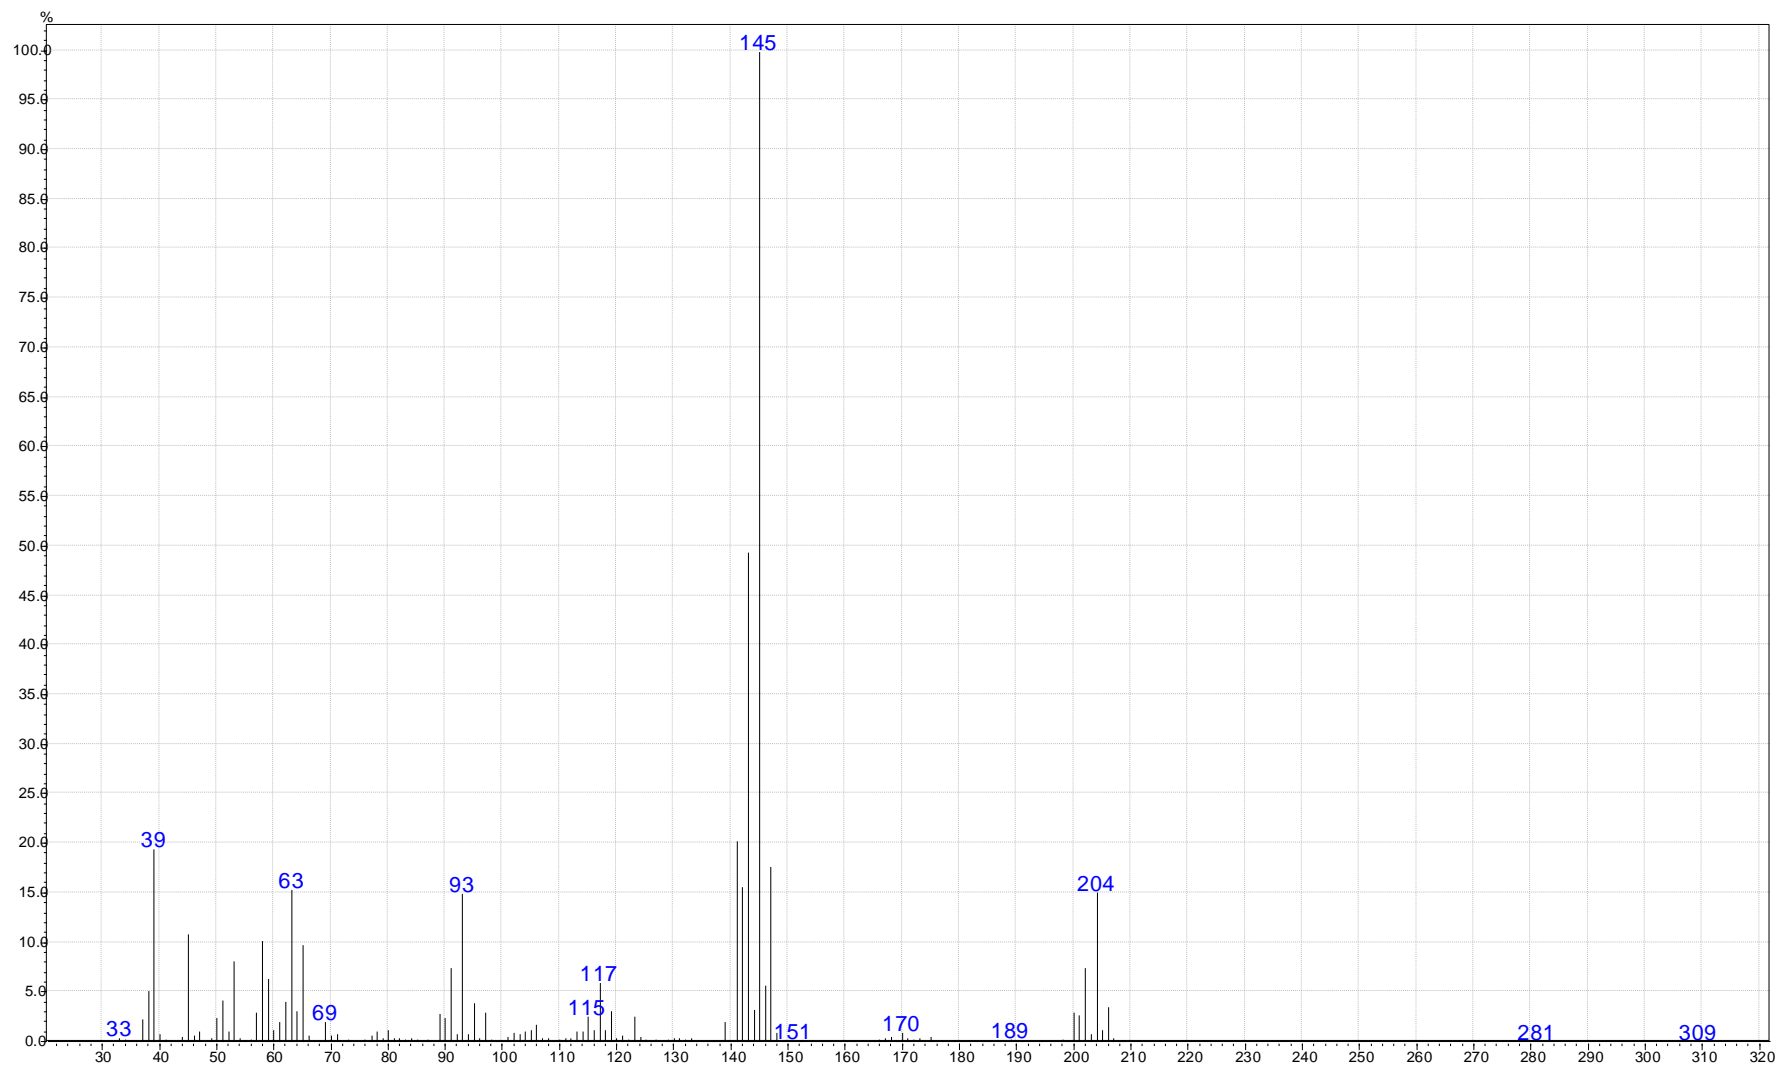

Mass-spectrum of (Z)-2-(propynylselanyl)ethenyl vinyl sulfide (2h)

<sup>1</sup>H

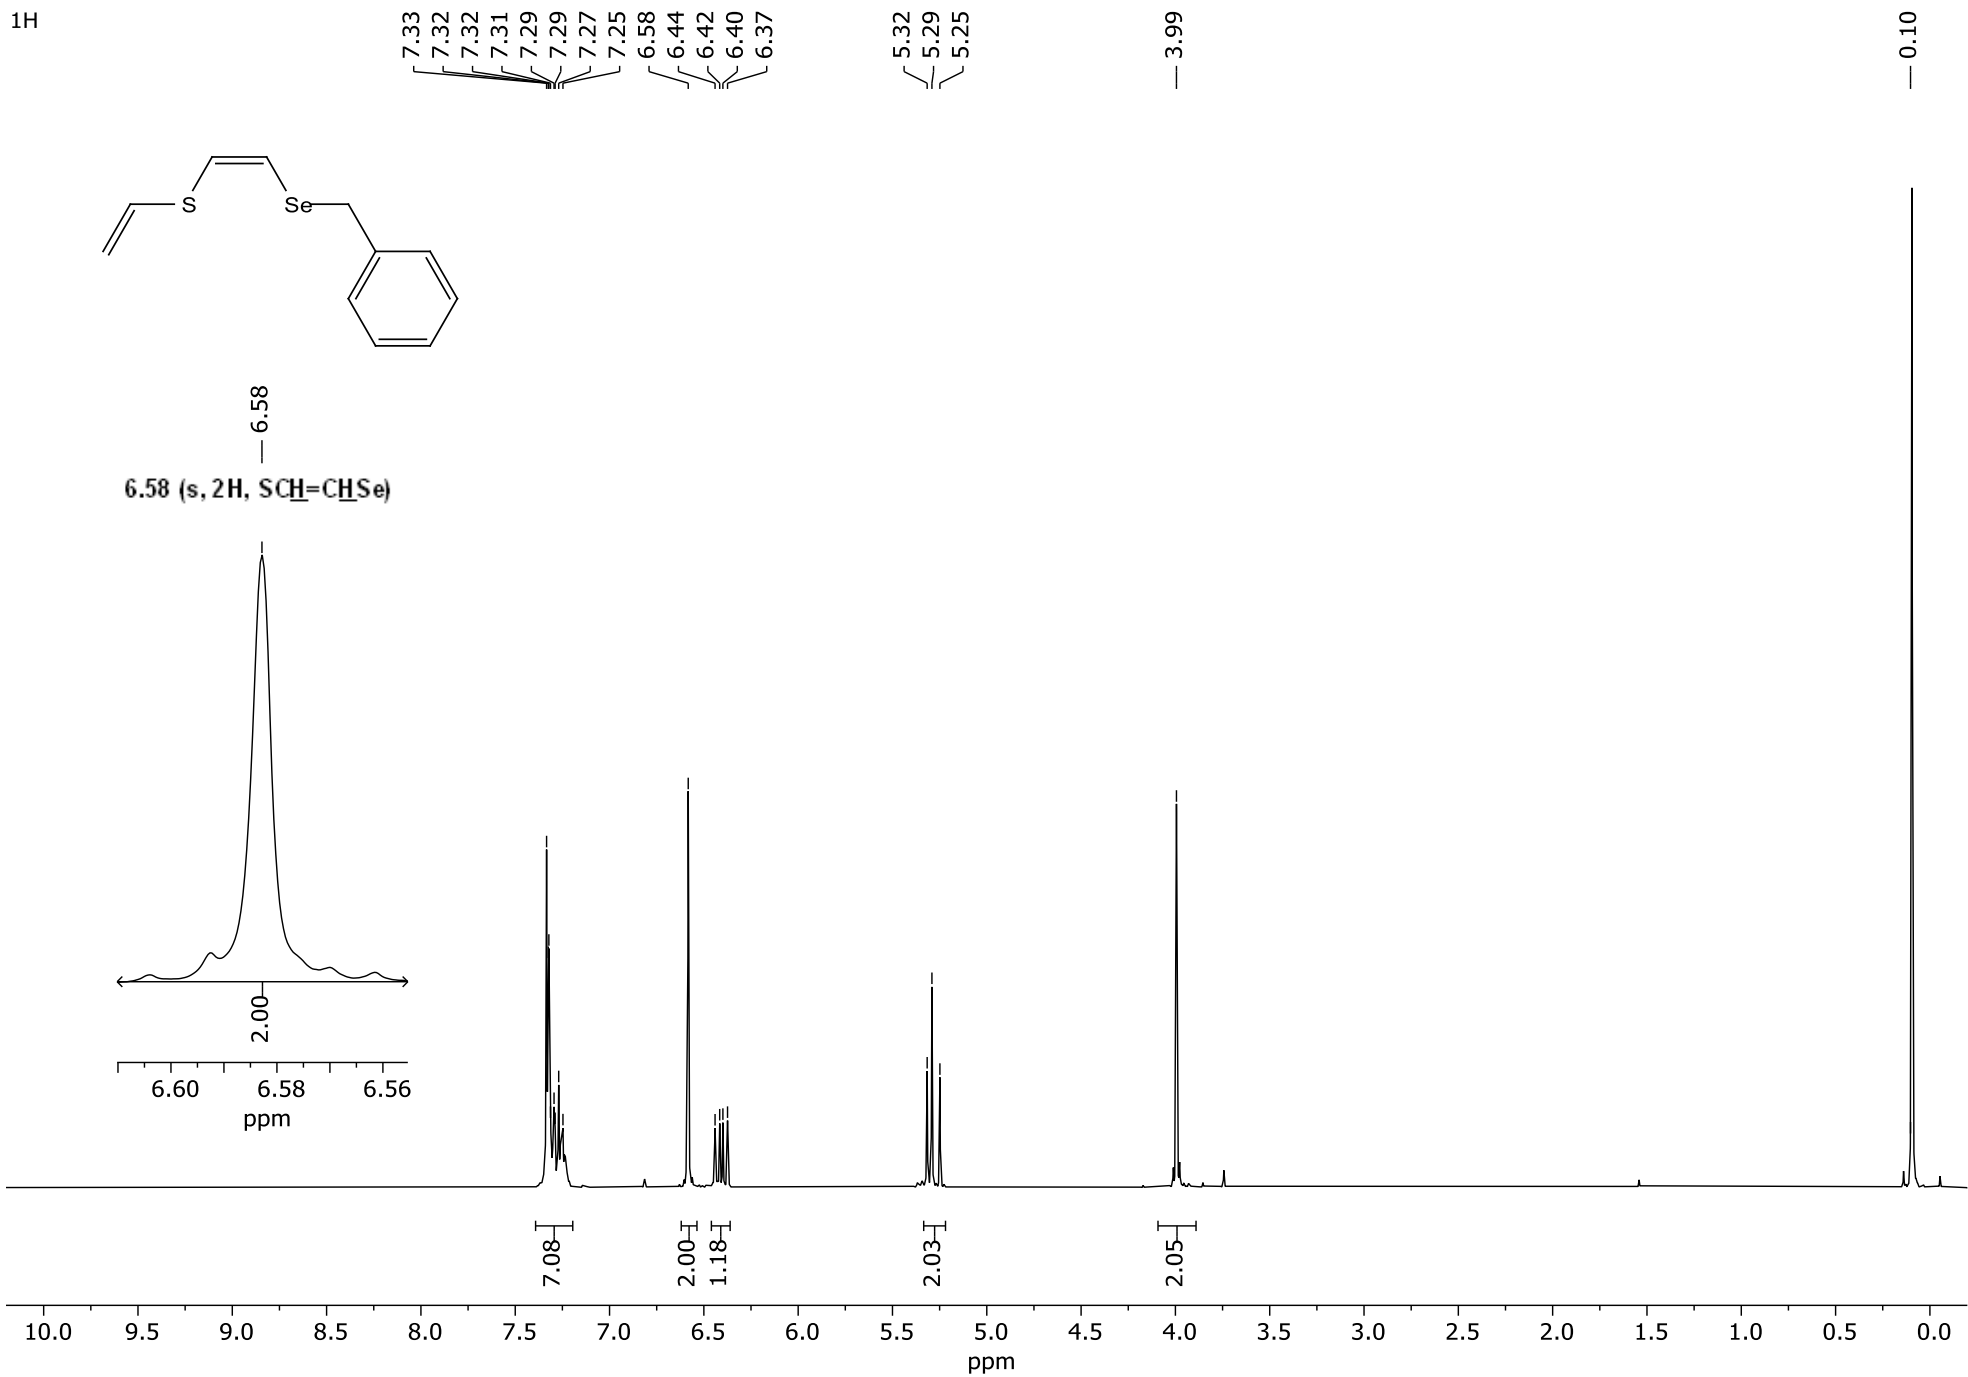

<sup>1</sup>H NMR spectrum of (Z)-2-(benzylselanyl)ethenyl vinyl sulfide (2i)



13C

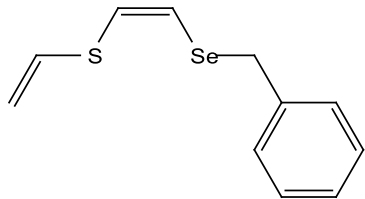

— 138.28  
— 130.02  
— 128.91  
— 128.58  
— 127.03  
— 123.99  
— 122.05  
— 113.46

— 77.00

— 30.14

— 130.02

— 128.91

— 128.58

— 127.03

131 130 129 128 127 126  
ppm

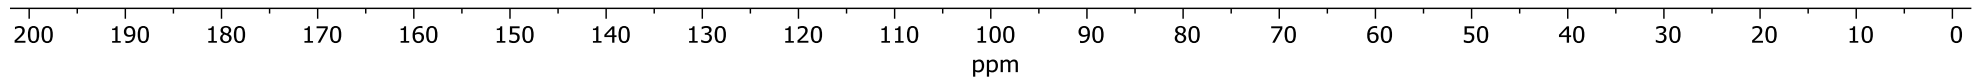

<sup>13</sup>C NMR spectrum of (Z)-2-(benzylselanyl)ethenyl vinyl sulfide (2i)

<sup>77</sup>Se

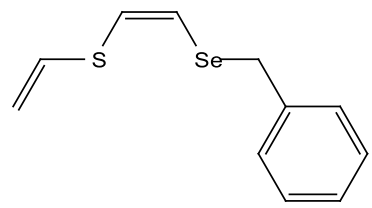

— 327.63

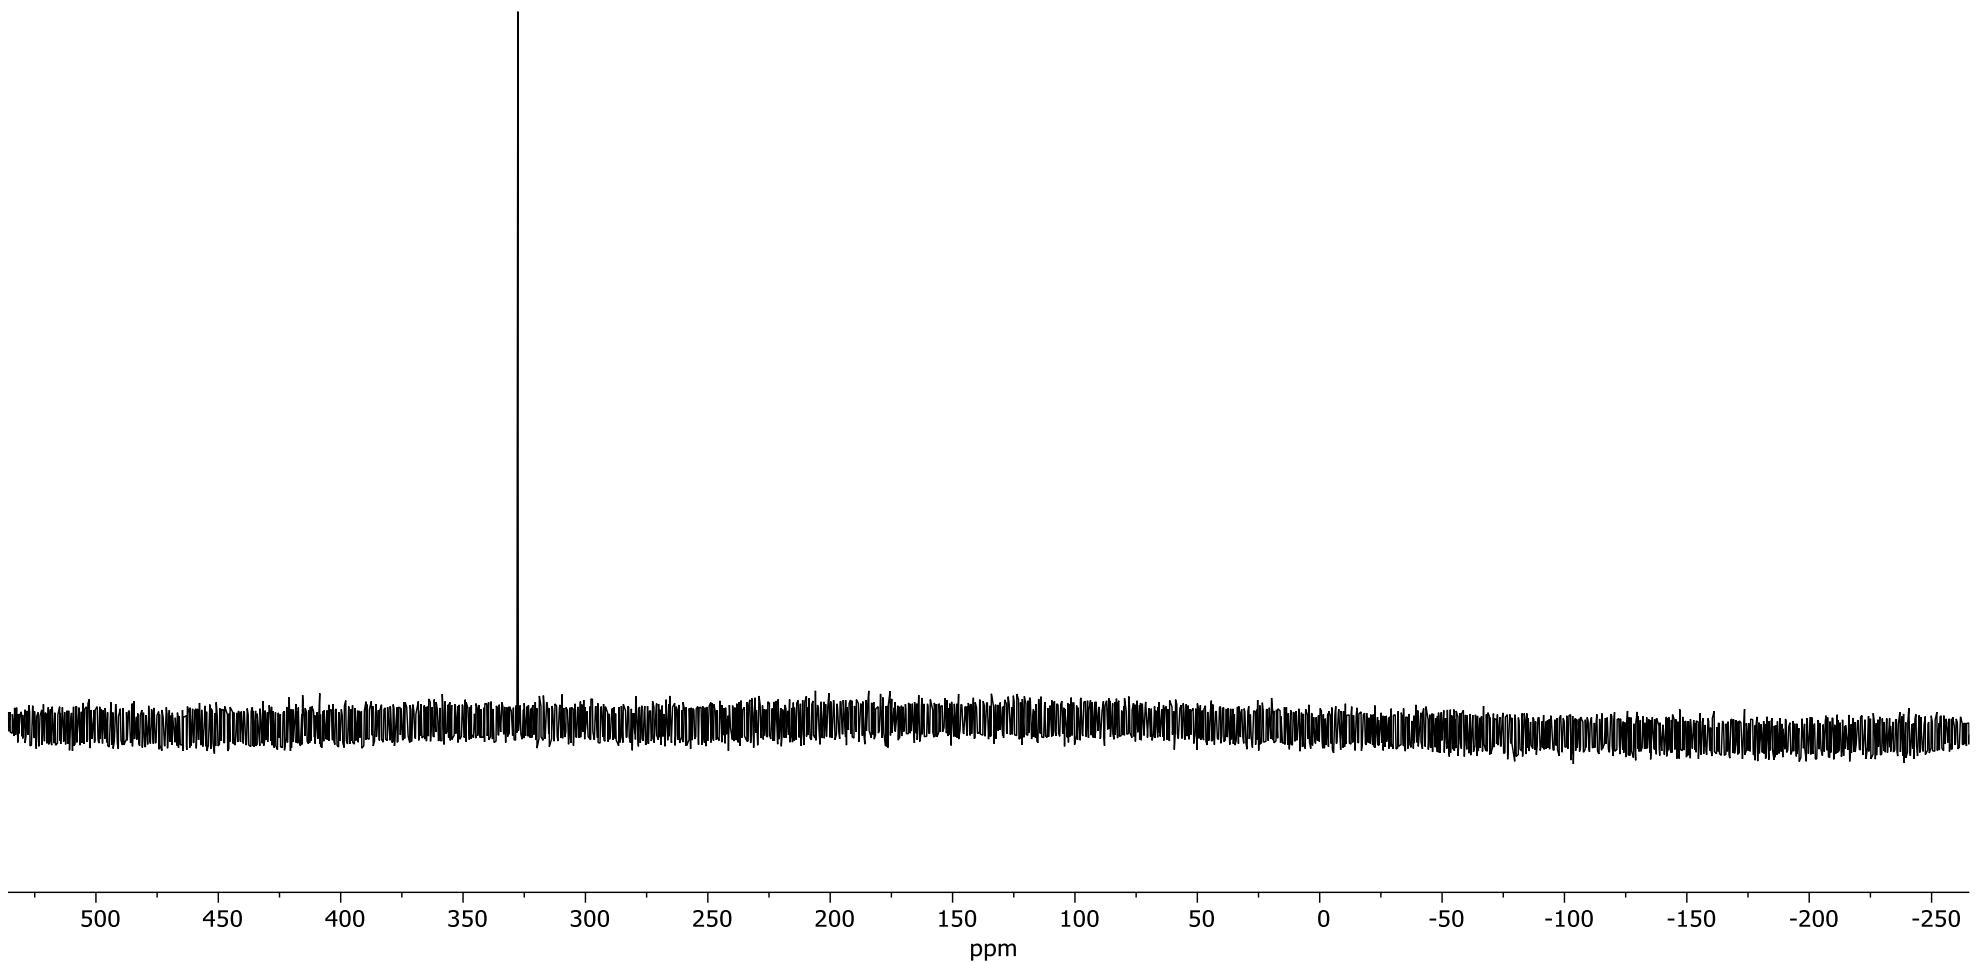

<sup>77</sup>Se NMR spectrum of (Z)-2-(benzylselanyl)ethenyl vinyl sulfide (2i)

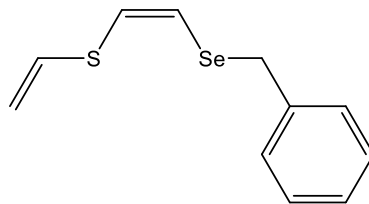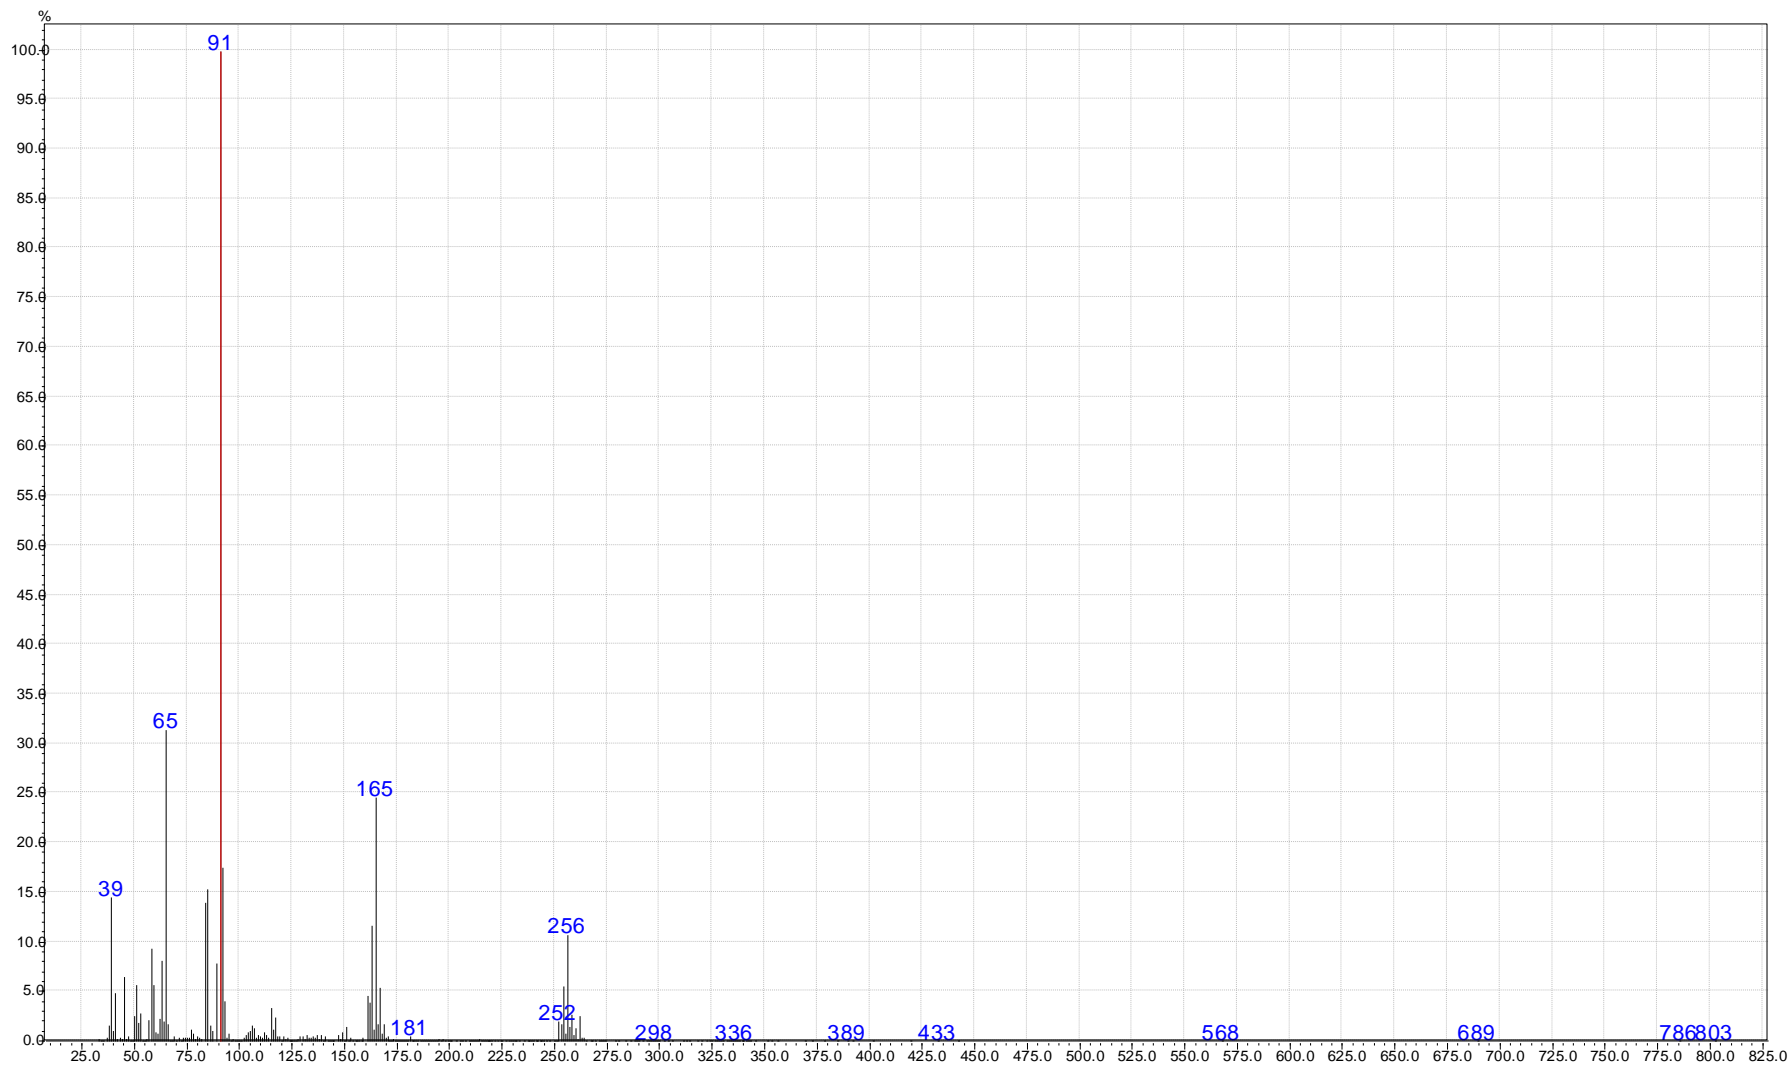

Mass-spectrum of (Z)-2-(benzylselanyl)ethenyl vinyl sulfide (2i)

<sup>1</sup>H

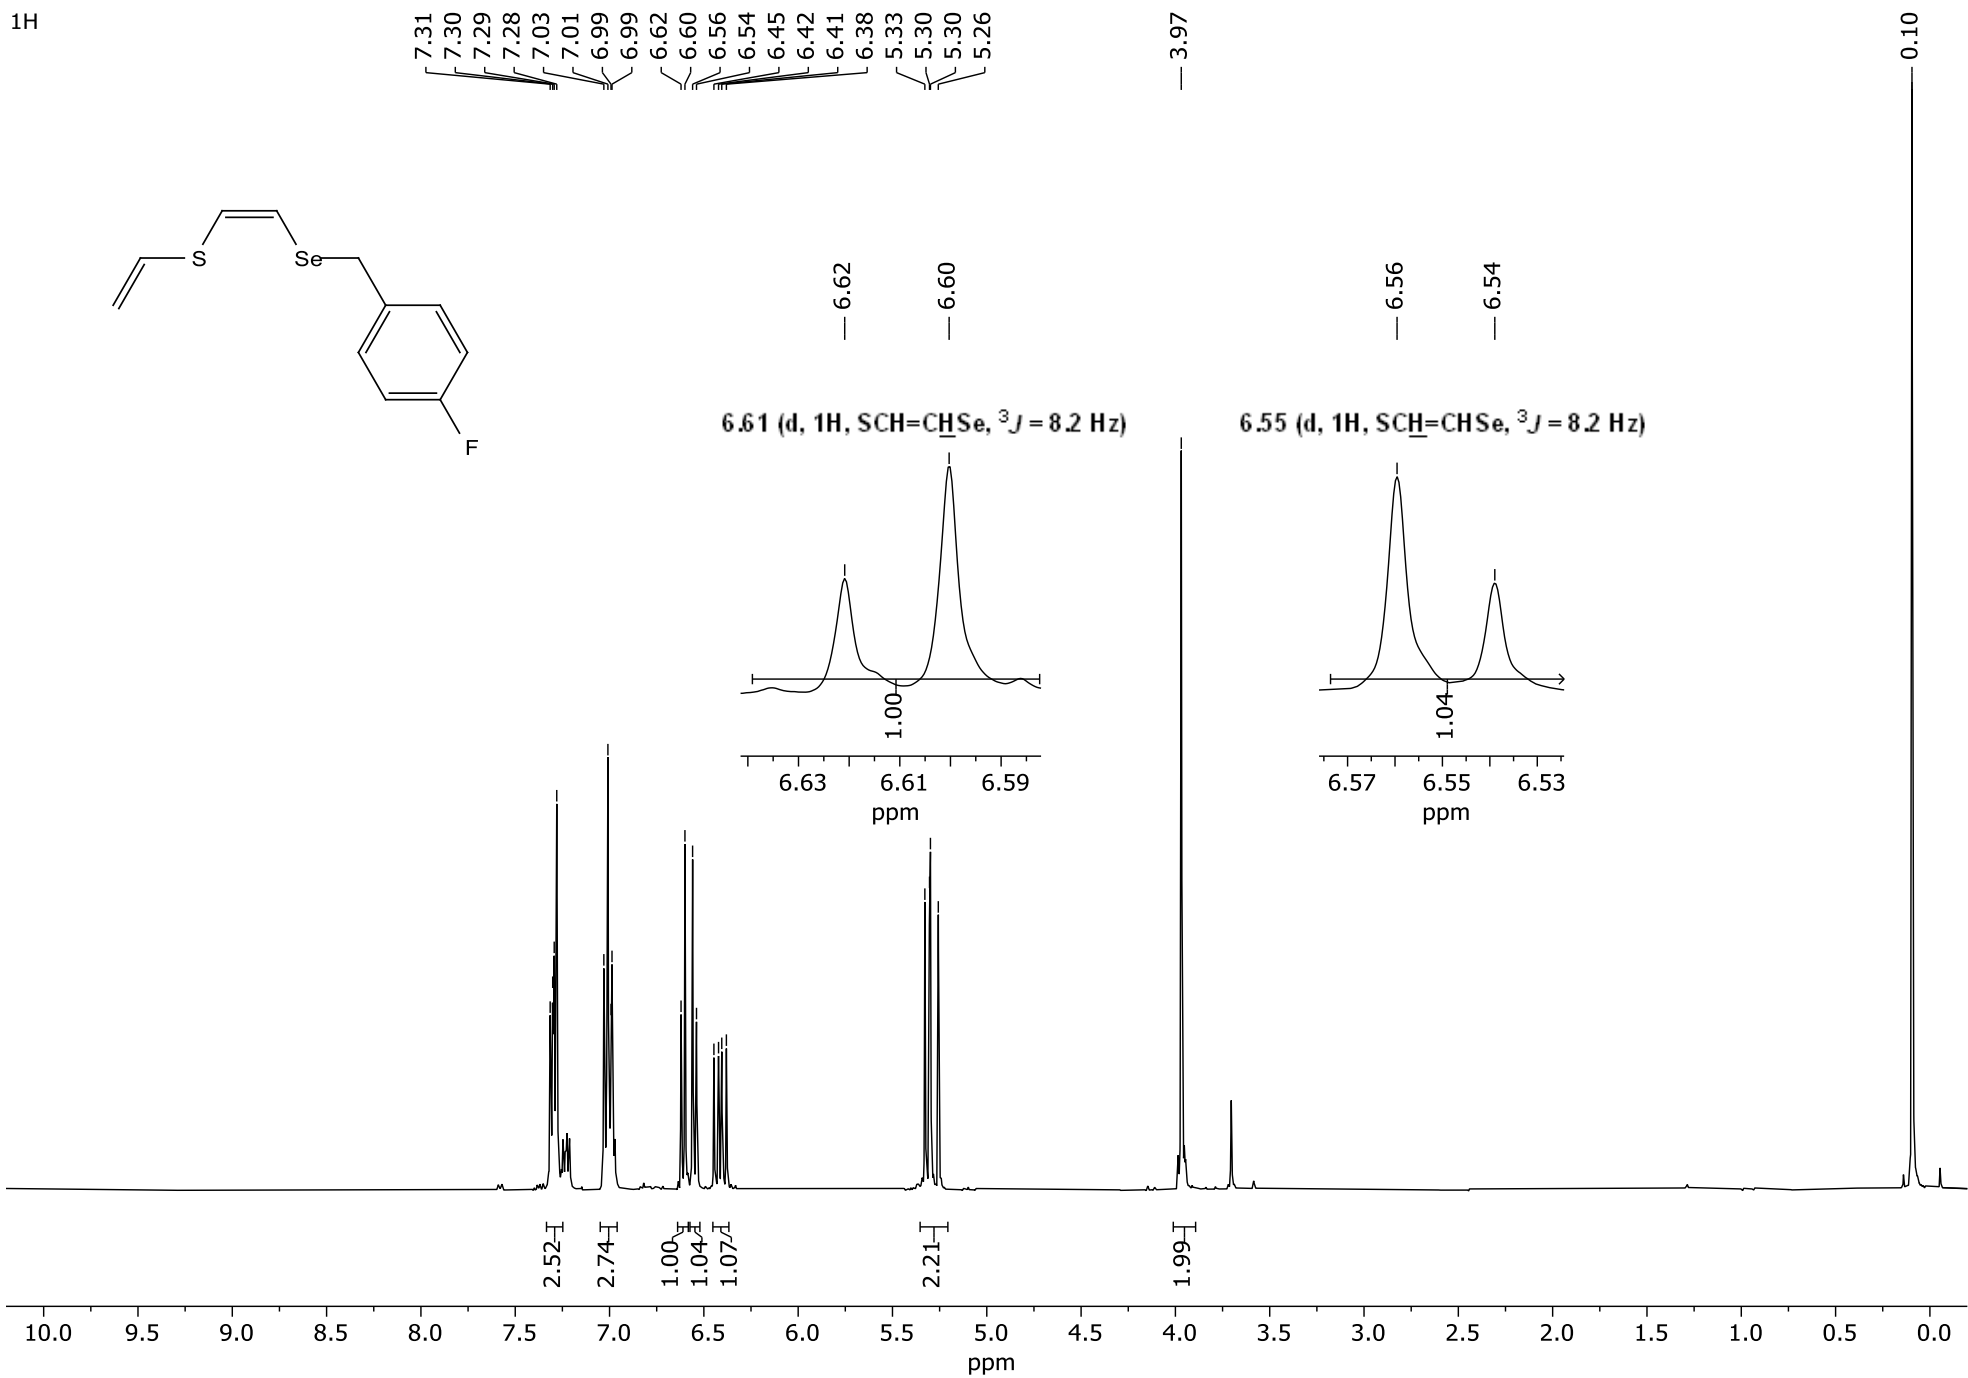

<sup>1</sup>H NMR spectrum of (Z)-2-[(4-fluorobenzylselanyl)ethenyl vinyl sulfide (2j)

13C

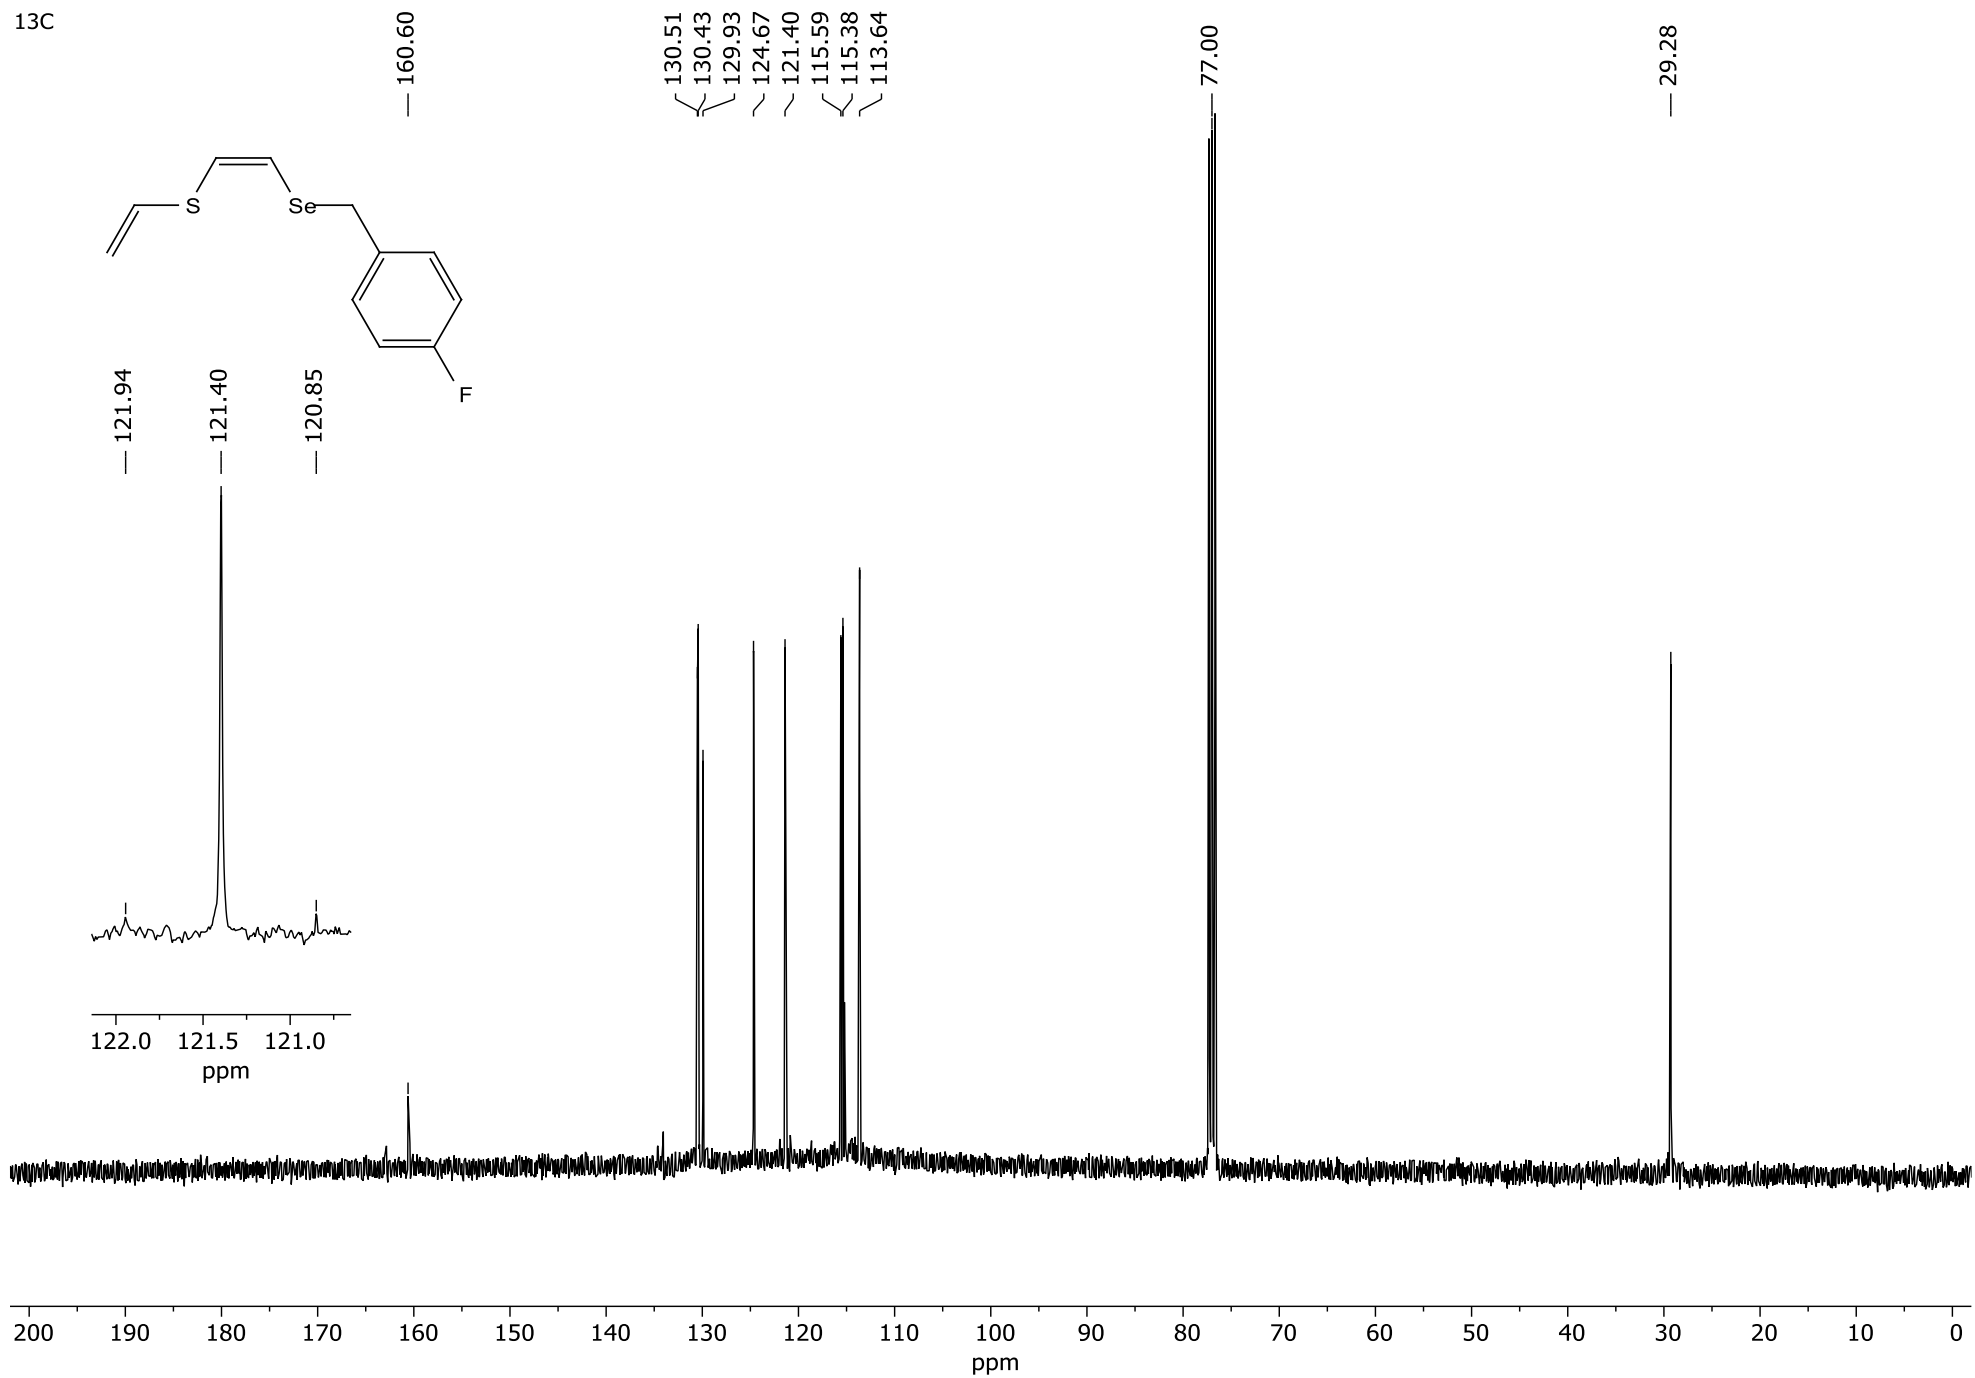

$^{13}\text{C}$  NMR spectrum of (Z)-2-[(4-fluorobenzylselanyl)ethenyl vinyl sulfide (2j)

<sup>77</sup>Se

327.79  
327.75

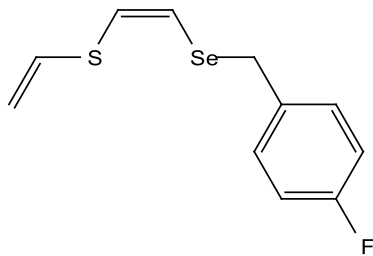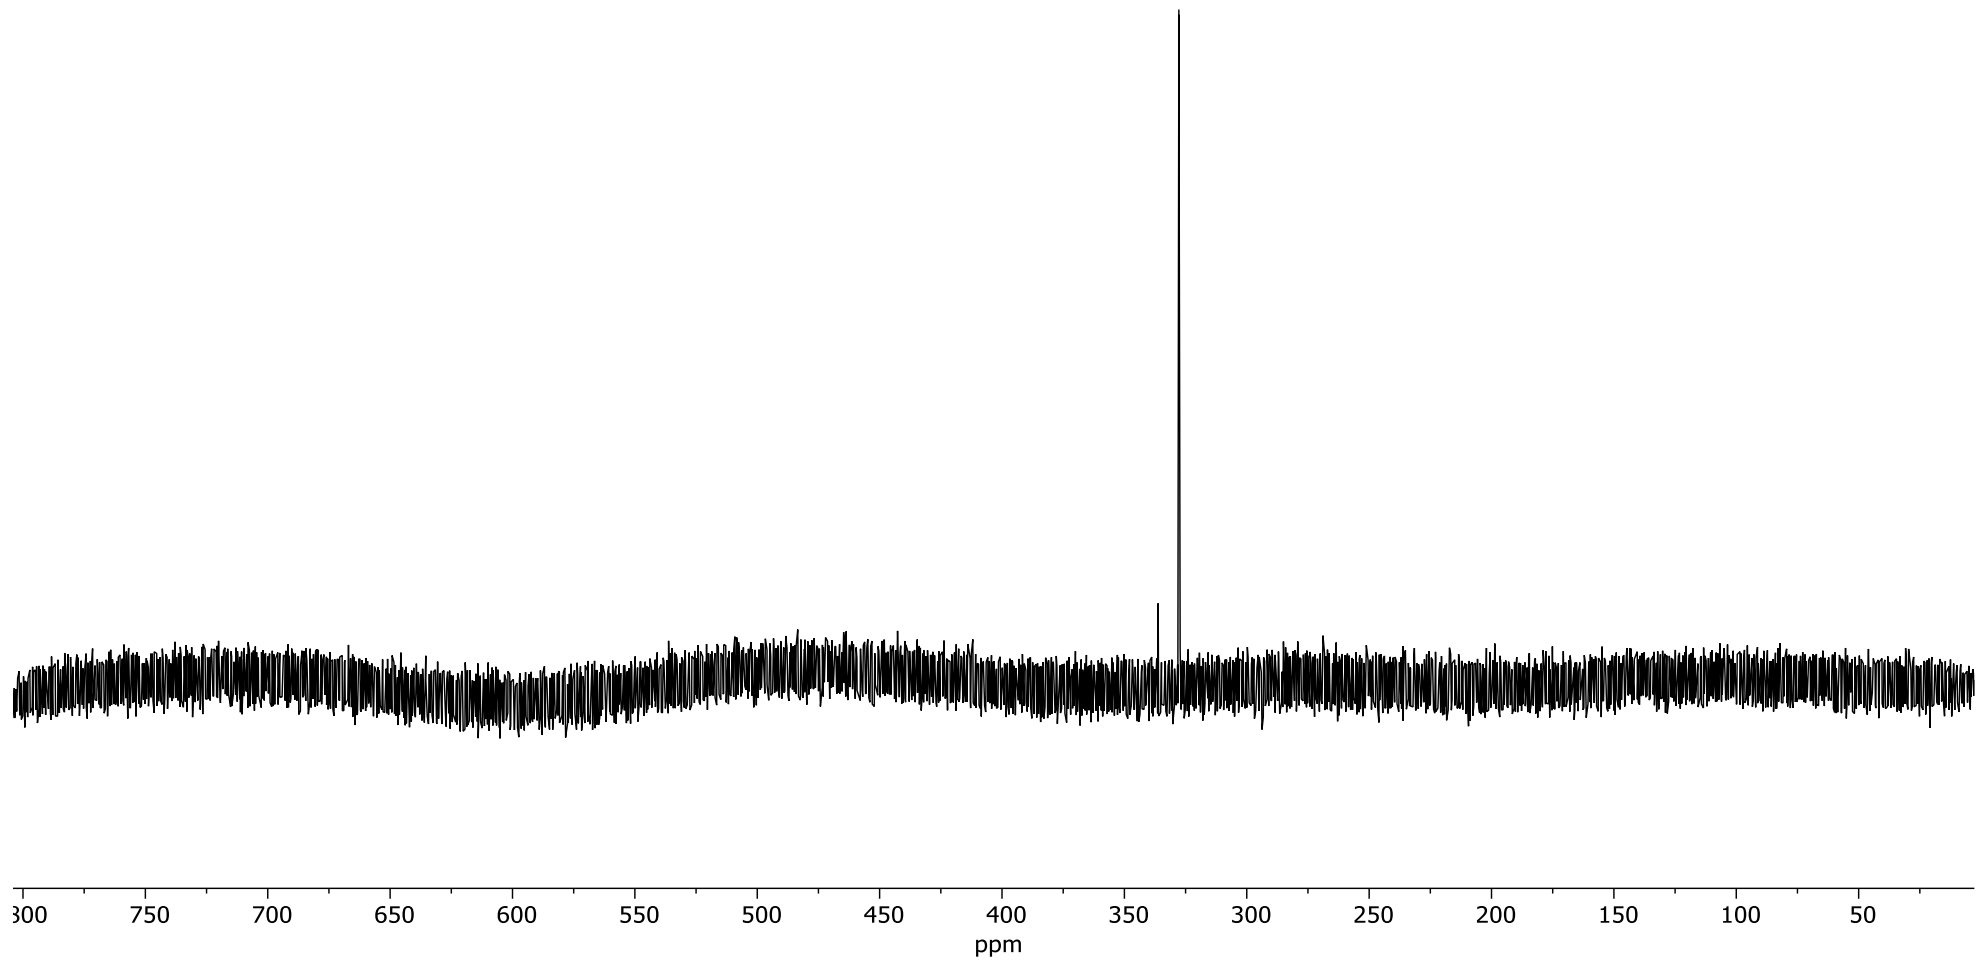

<sup>77</sup>Se NMR spectrum of (Z)-2-[(4-fluorobenzylselanyl)ethenyl]vinyl sulfide (2j)

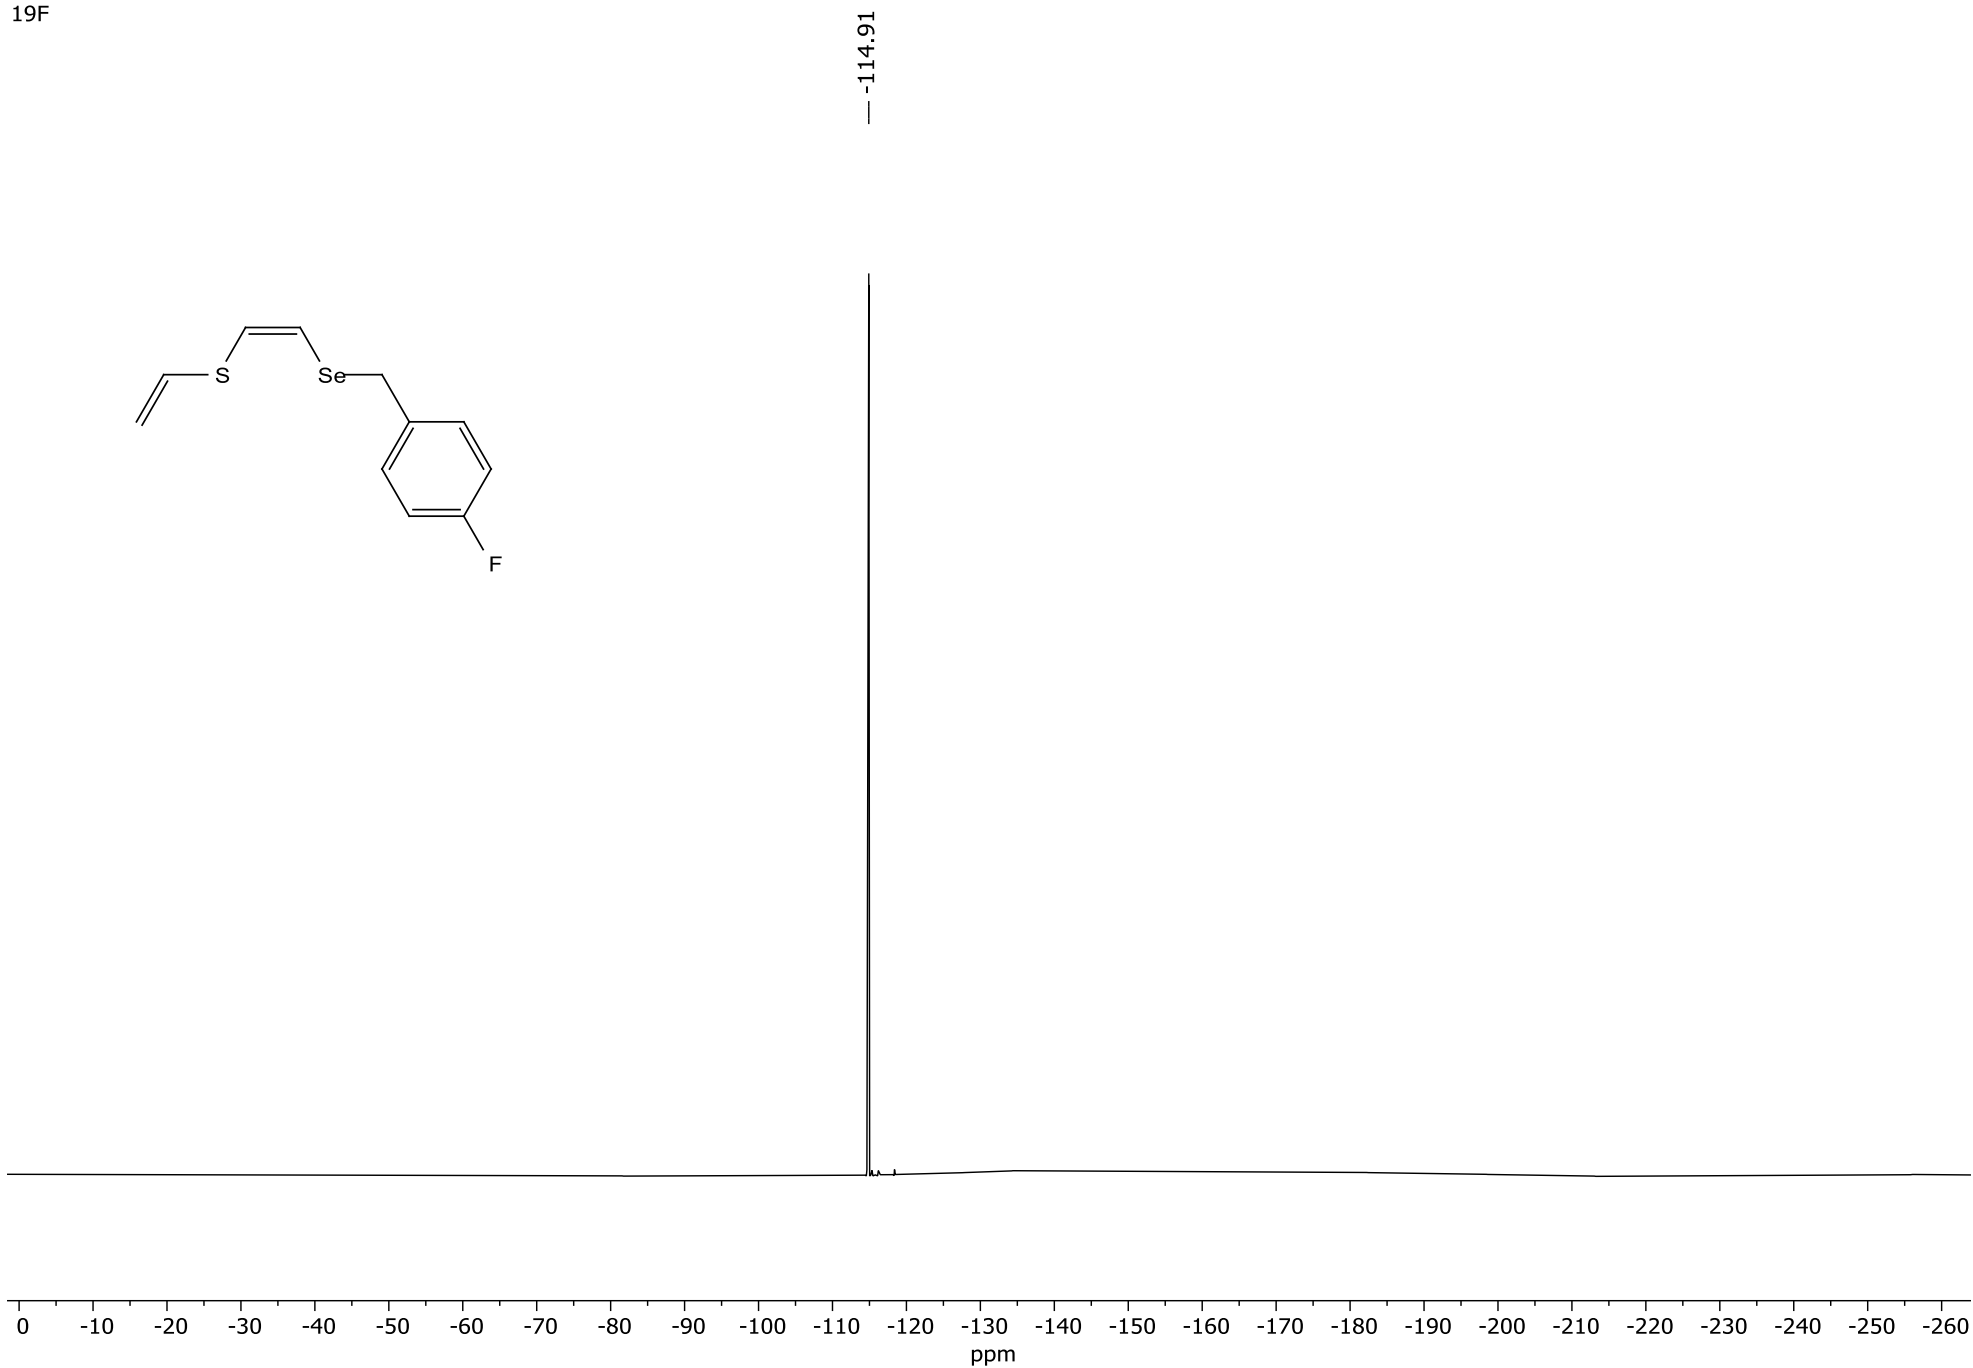

$^{19}\text{F}$  NMR spectrum of (Z)-2-[(4-fluorobenzylselanyl)ethenyl vinyl sulfide (2j)

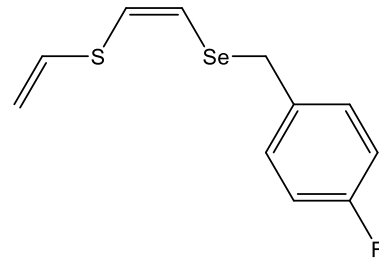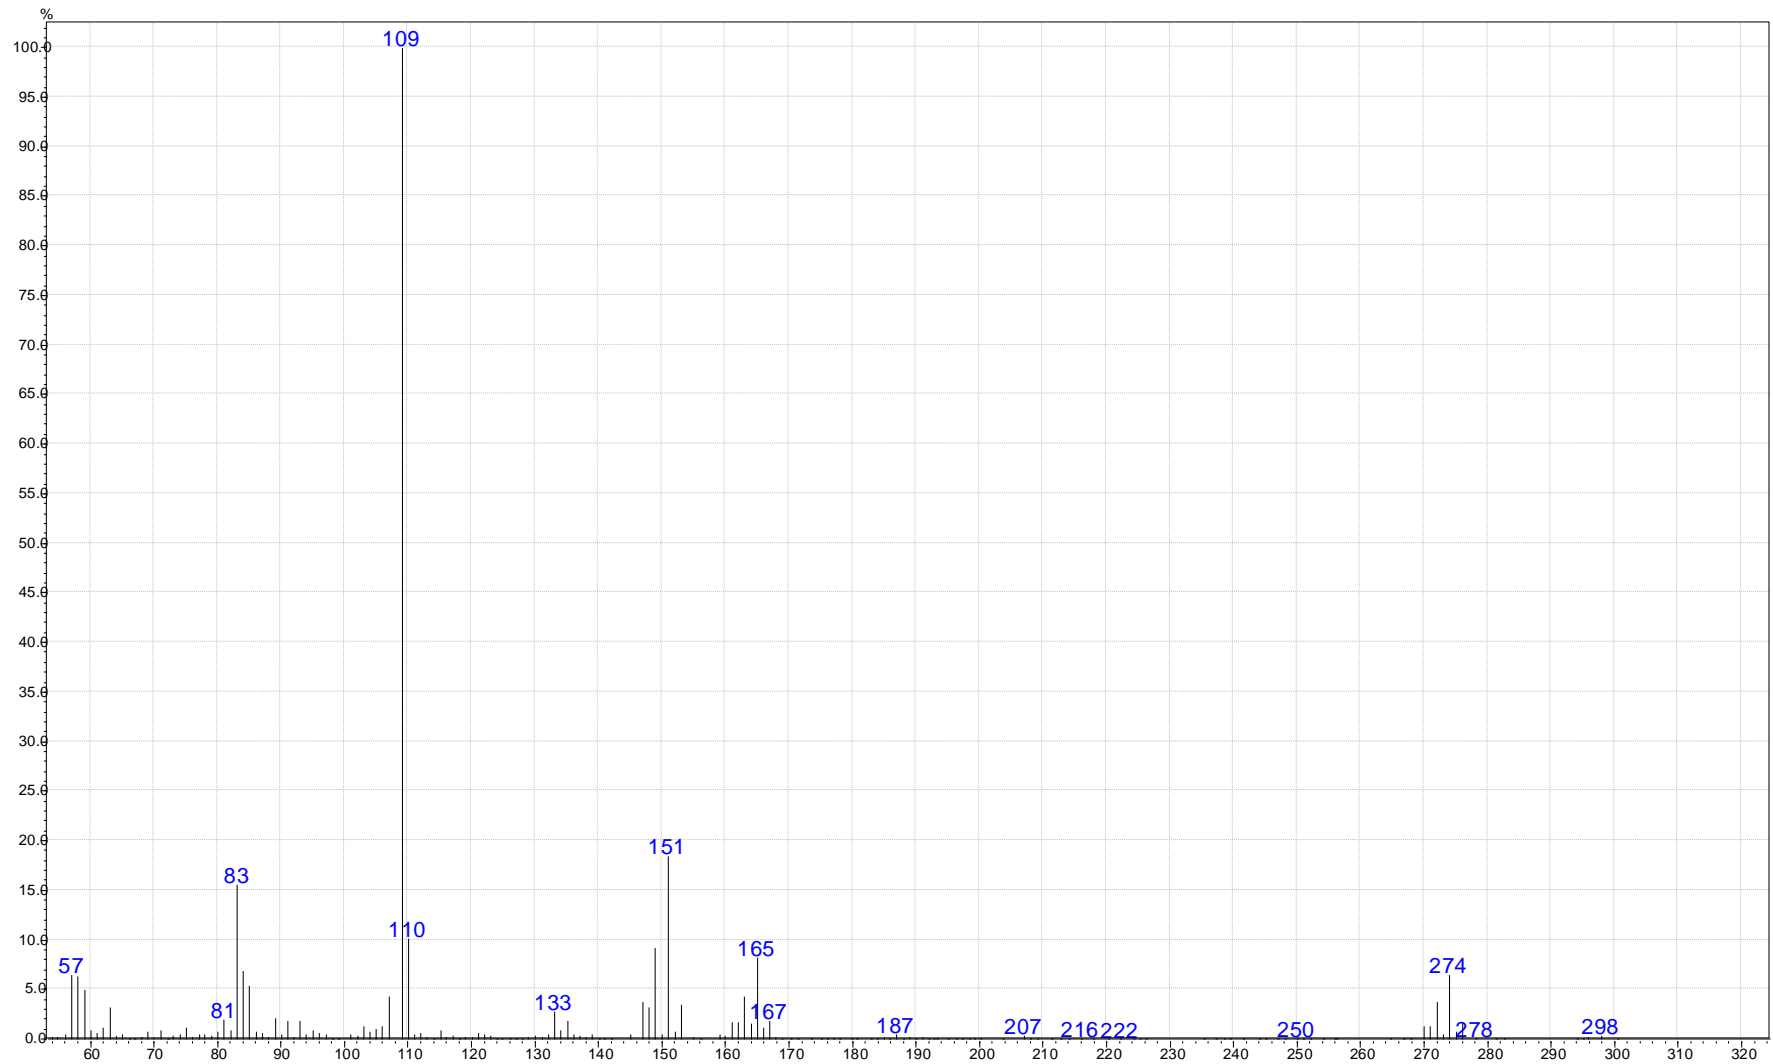

Mass-spectrum of (Z)-2-[(4-fluorobenzylselanyl)ethenyl vinyl sulfide (2j)



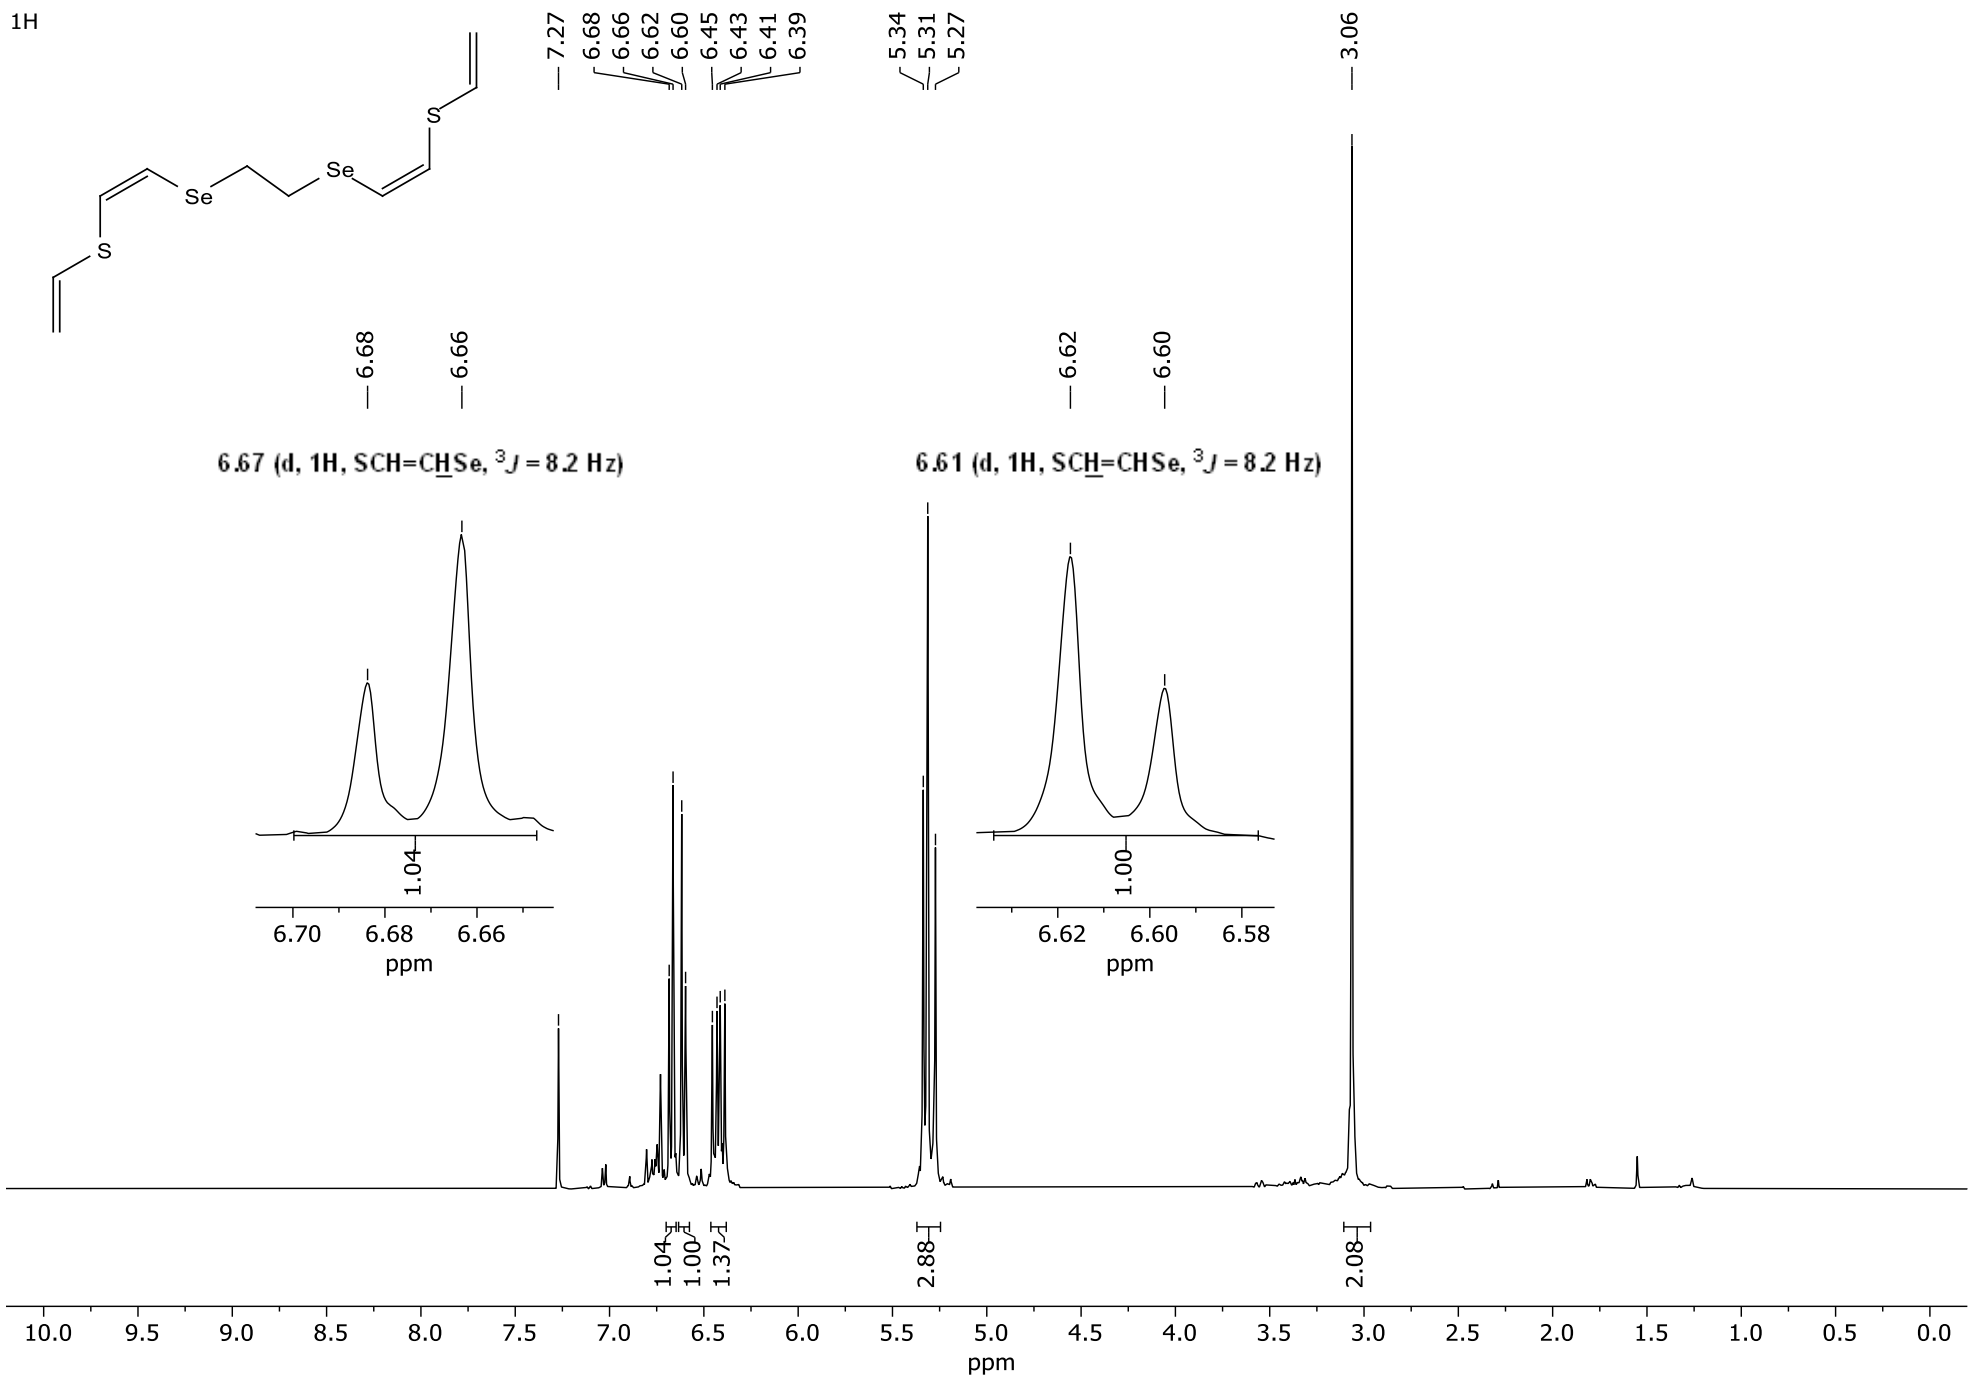

<sup>1</sup>H NMR spectrum of vinyl (Z)-2-[(2-[(Z)-2-(vinylsulfanyl)ethenyl]selanyl)ethyl]selanyl]ethenyl sulfide (3a)

<sup>13</sup>C

129.82  
125.55  
120.91  
113.73

77.00

27.10

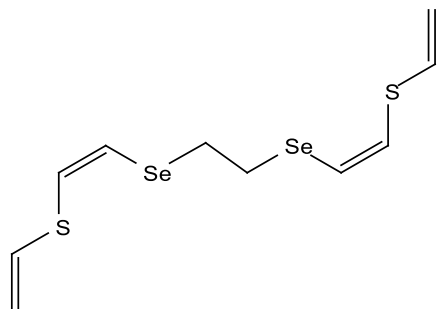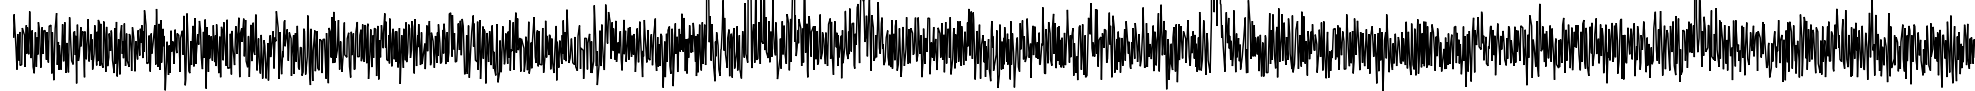

200 190 180 170 160 150 140 130 120 110 100 90 80 70 60 50 40 30 20 10 0

<sup>13</sup>C NMR

spectrum of vinyl (Z)-2-[(2-[(Z)-2-(vinylsulfanyl)ethenyl]selanyl)ethyl]selanyl]ethenyl sulfide (3a)

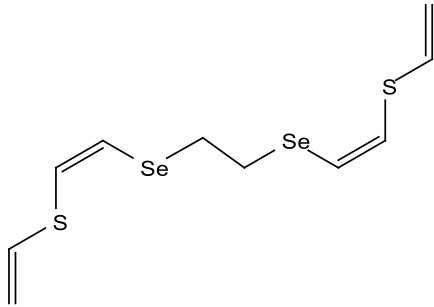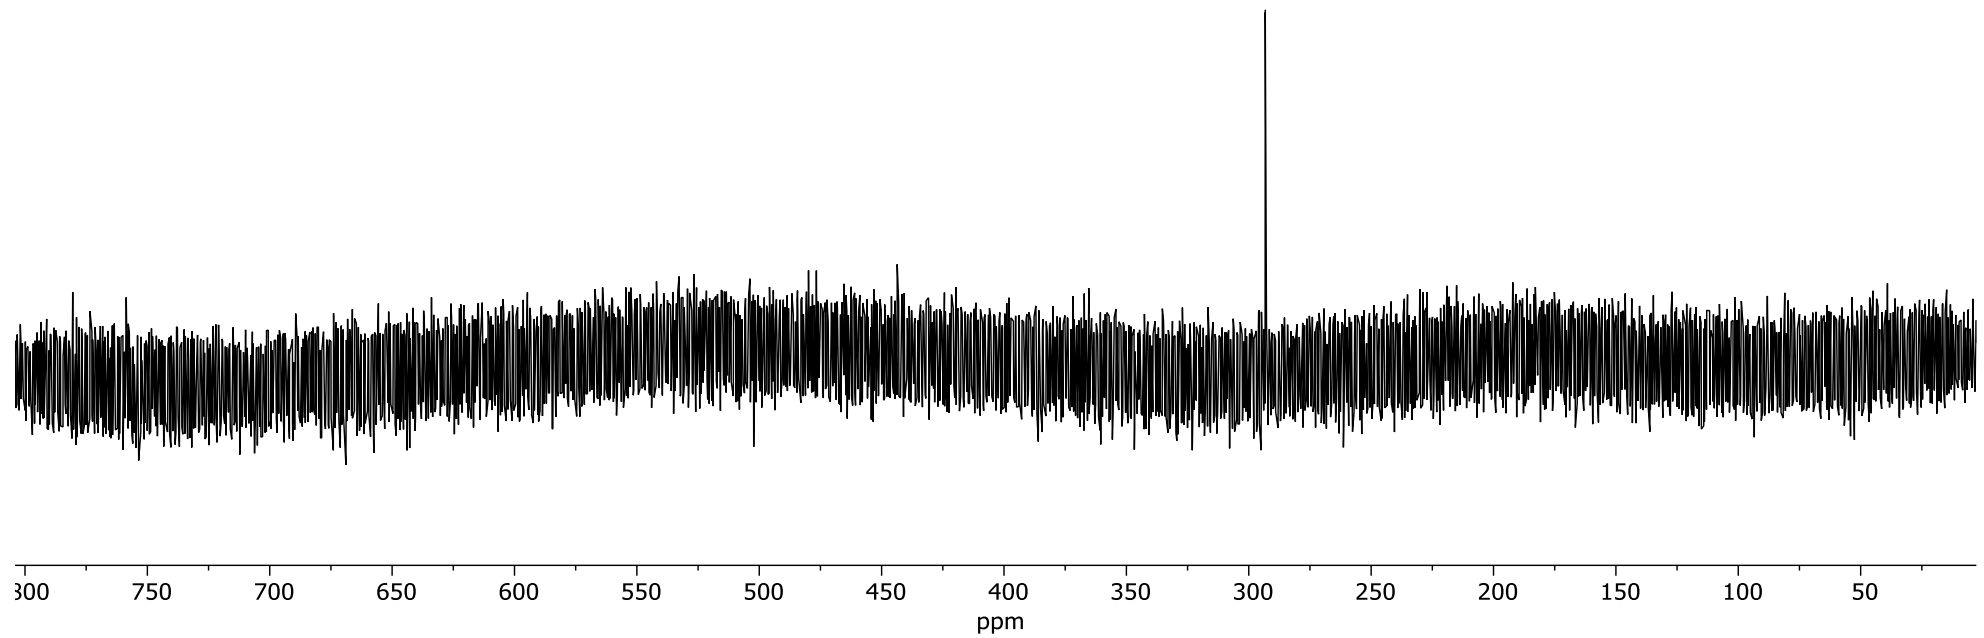

$^{77}\text{Se}$  NMR spectrum of vinyl (Z)-2-[(2-[(Z)-2-(vinylsulfanyl)ethenyl]selanyl)ethyl]selanyl ethenyl sulfide (3a)

<sup>1</sup>H

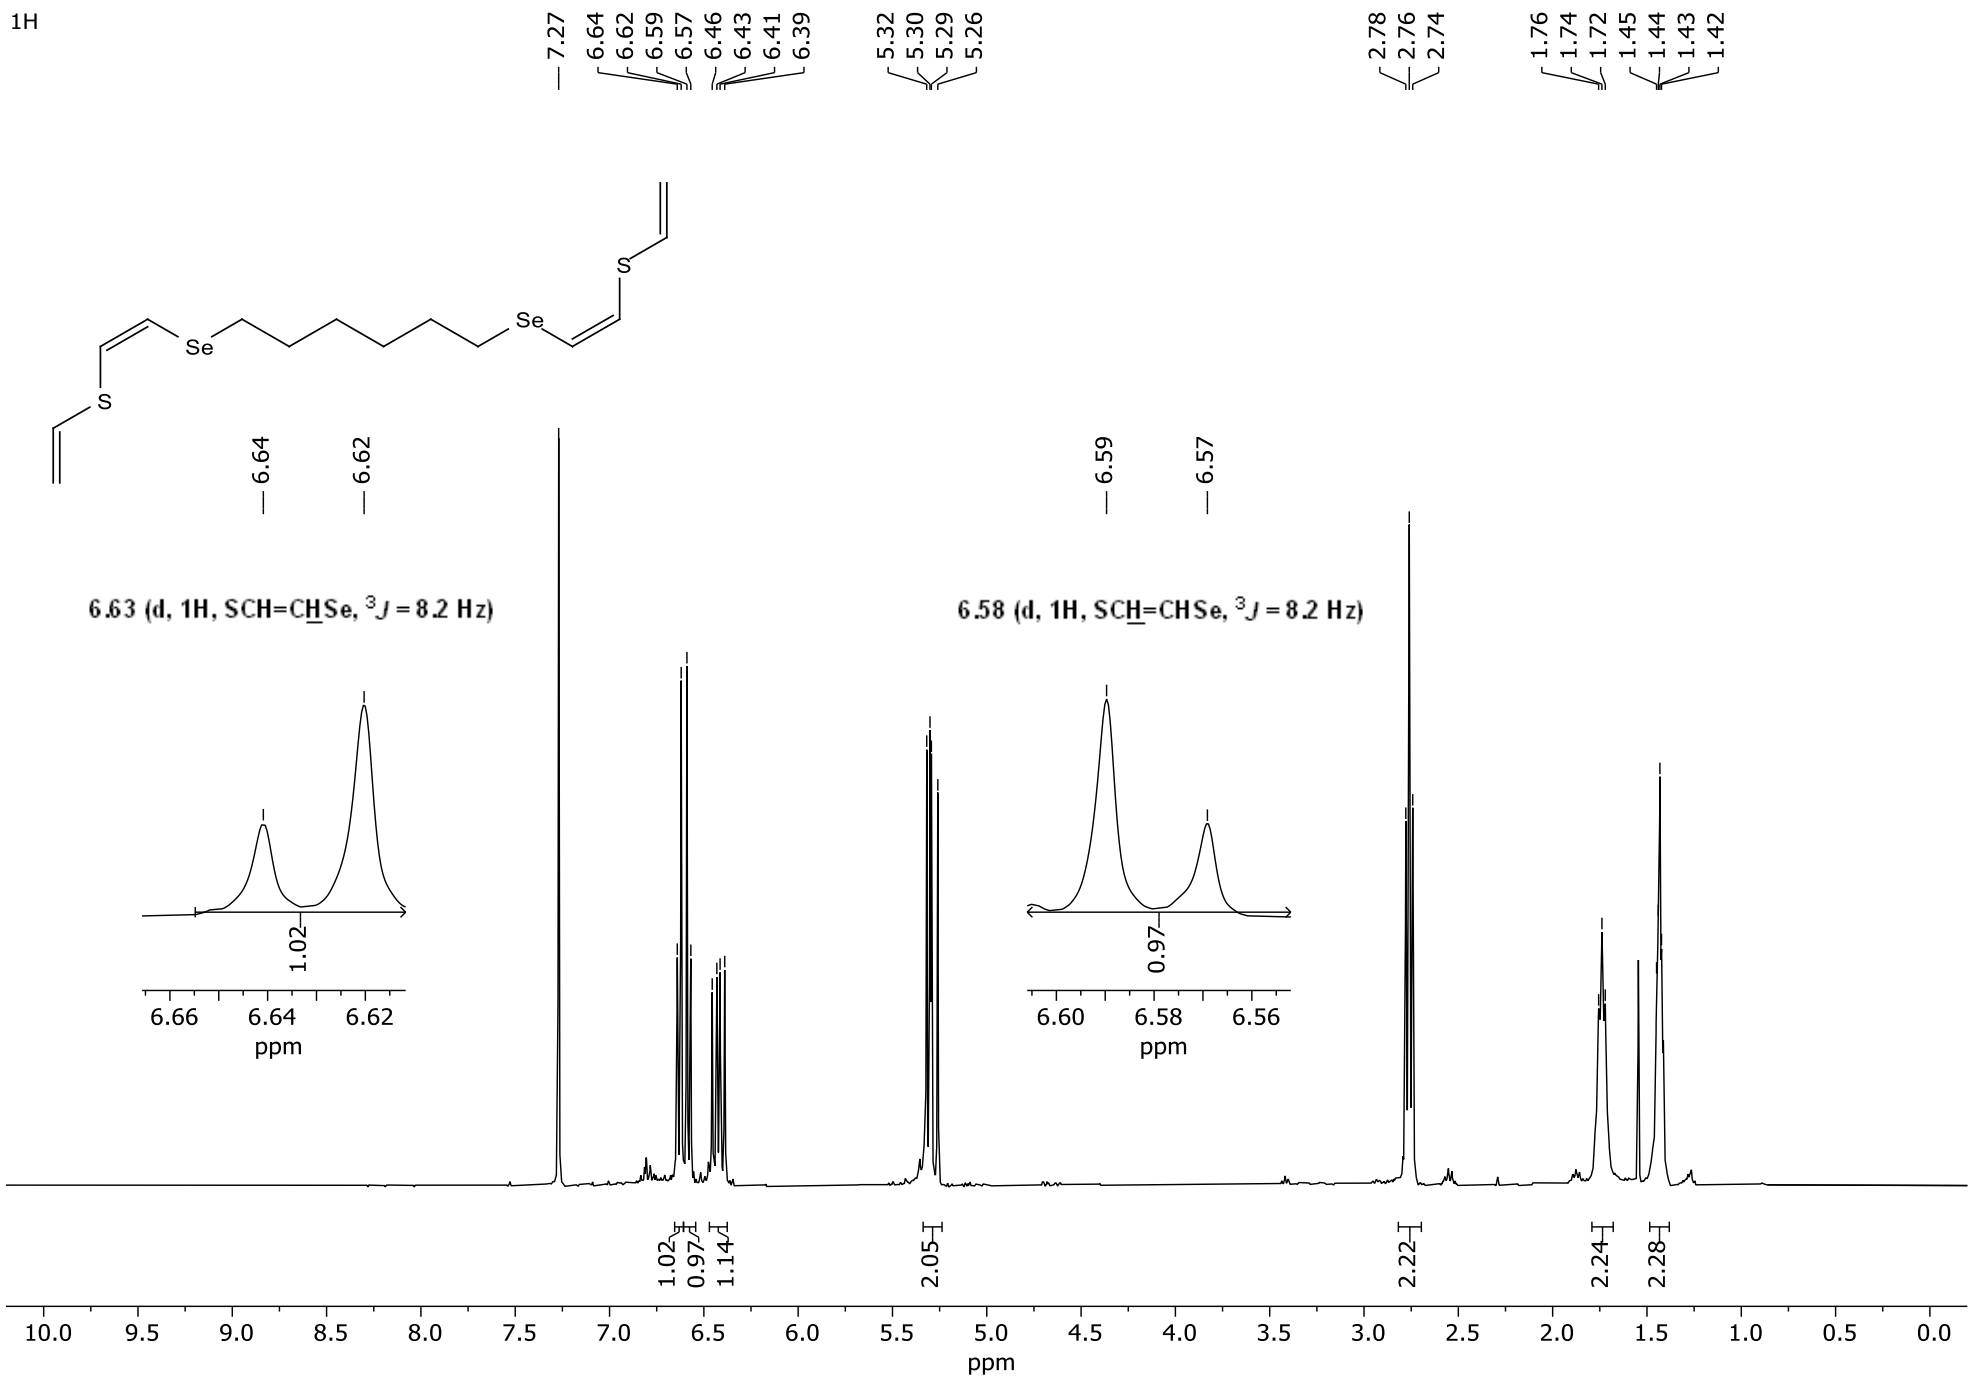

<sup>1</sup>H NMR spectrum of vinyl (Z)-2-[(6-[(Z)-2-(vinylsulfanyl)ethenyl]selanyl)hexyl]selanyl]ethenyl sulfide (3b)

13C

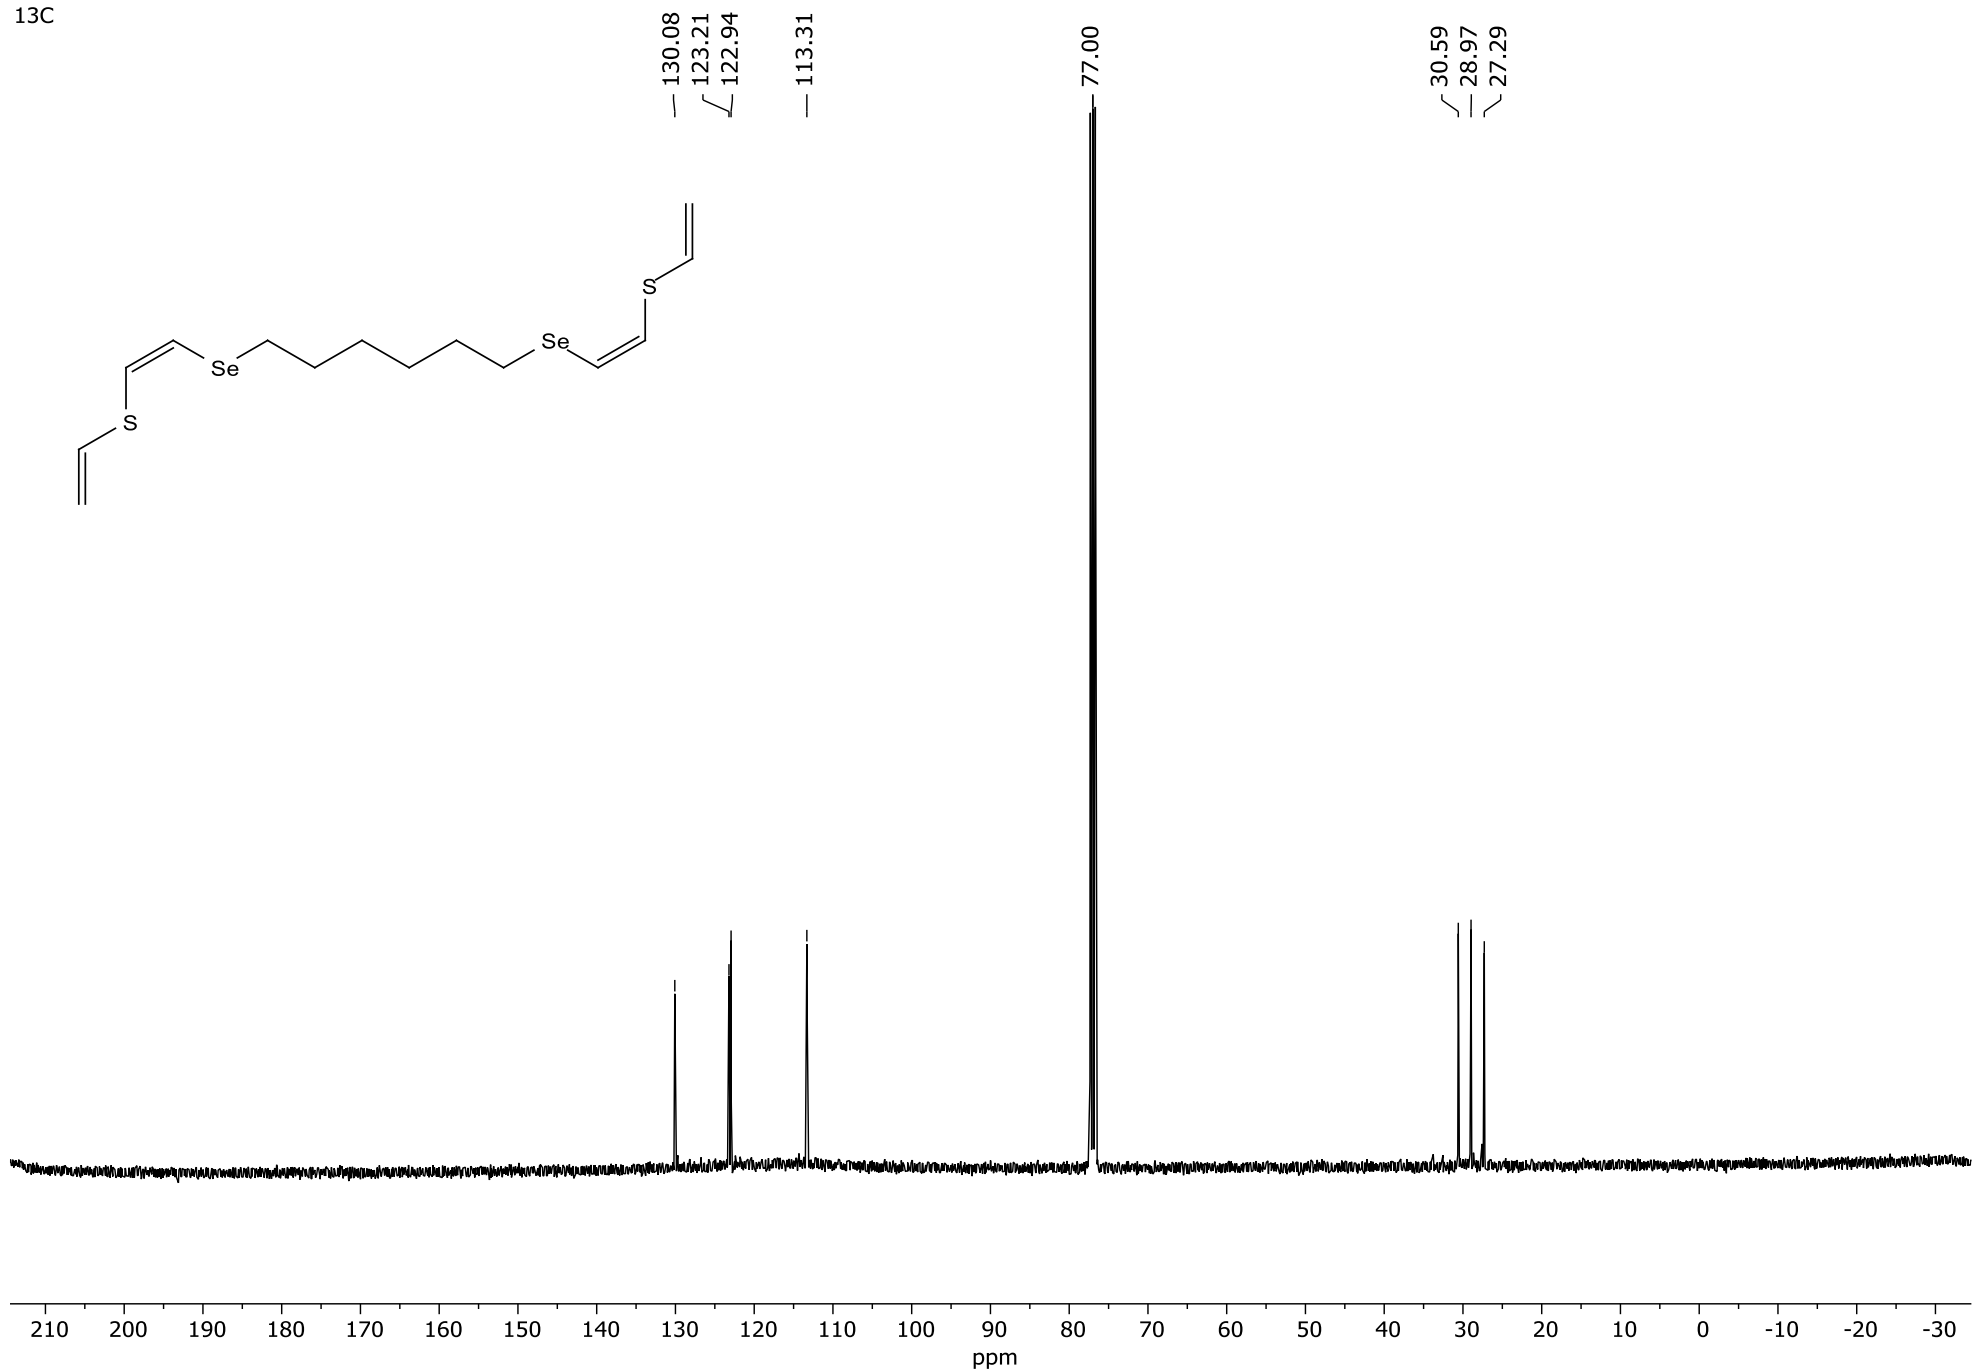

<sup>13</sup>C NMR spectrum of vinyl (Z)-2-[(6-[(Z)-2-(vinylsulfanyl)ethenyl]selanyl}hexyl)selanyl]ethenyl sulfide (3b)

<sup>77</sup>Se

— 254.29

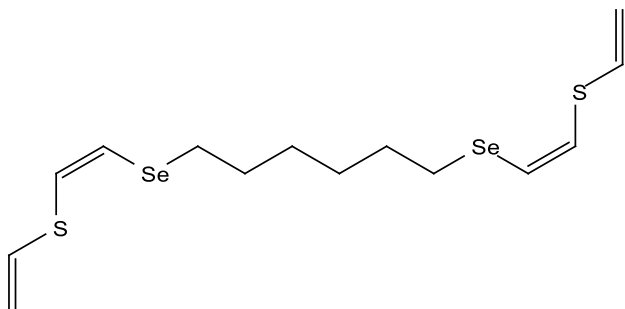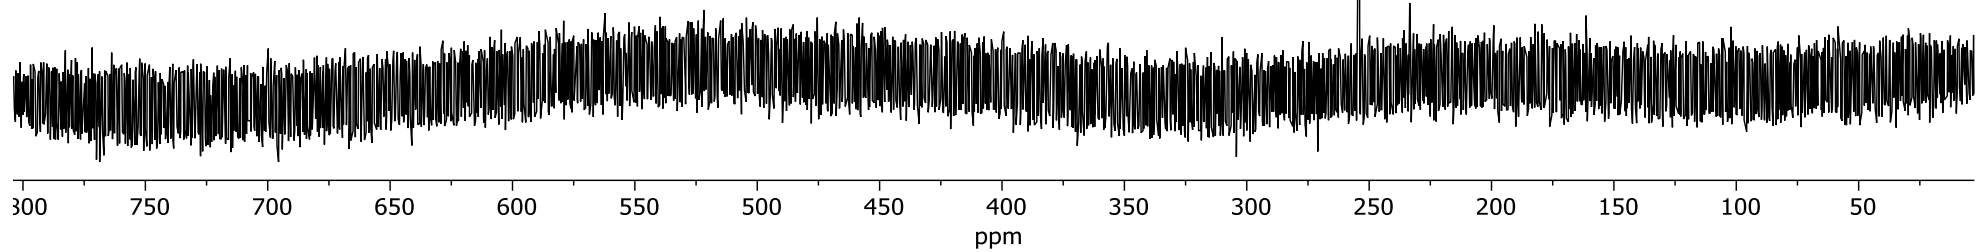

<sup>77</sup>Se NMR spectrum of vinyl (Z)-2-[(6-[(Z)-2-(vinylsulfanyl)ethenyl]selanyl)hexyl]selanyl ethenyl sulfide (3b)

<sup>1</sup>H

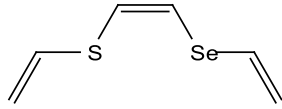

7.27  
6.77  
6.75  
6.73  
6.71  
6.71  
6.69  
6.46  
6.43  
6.42  
6.39  
5.79  
5.77  
5.59  
5.55  
5.35  
5.33  
5.32  
5.29

6.71  
6.71

6.69

6.70 (d, 1H, SCH=CHSe, <sup>3</sup>J = 8.2 Hz)

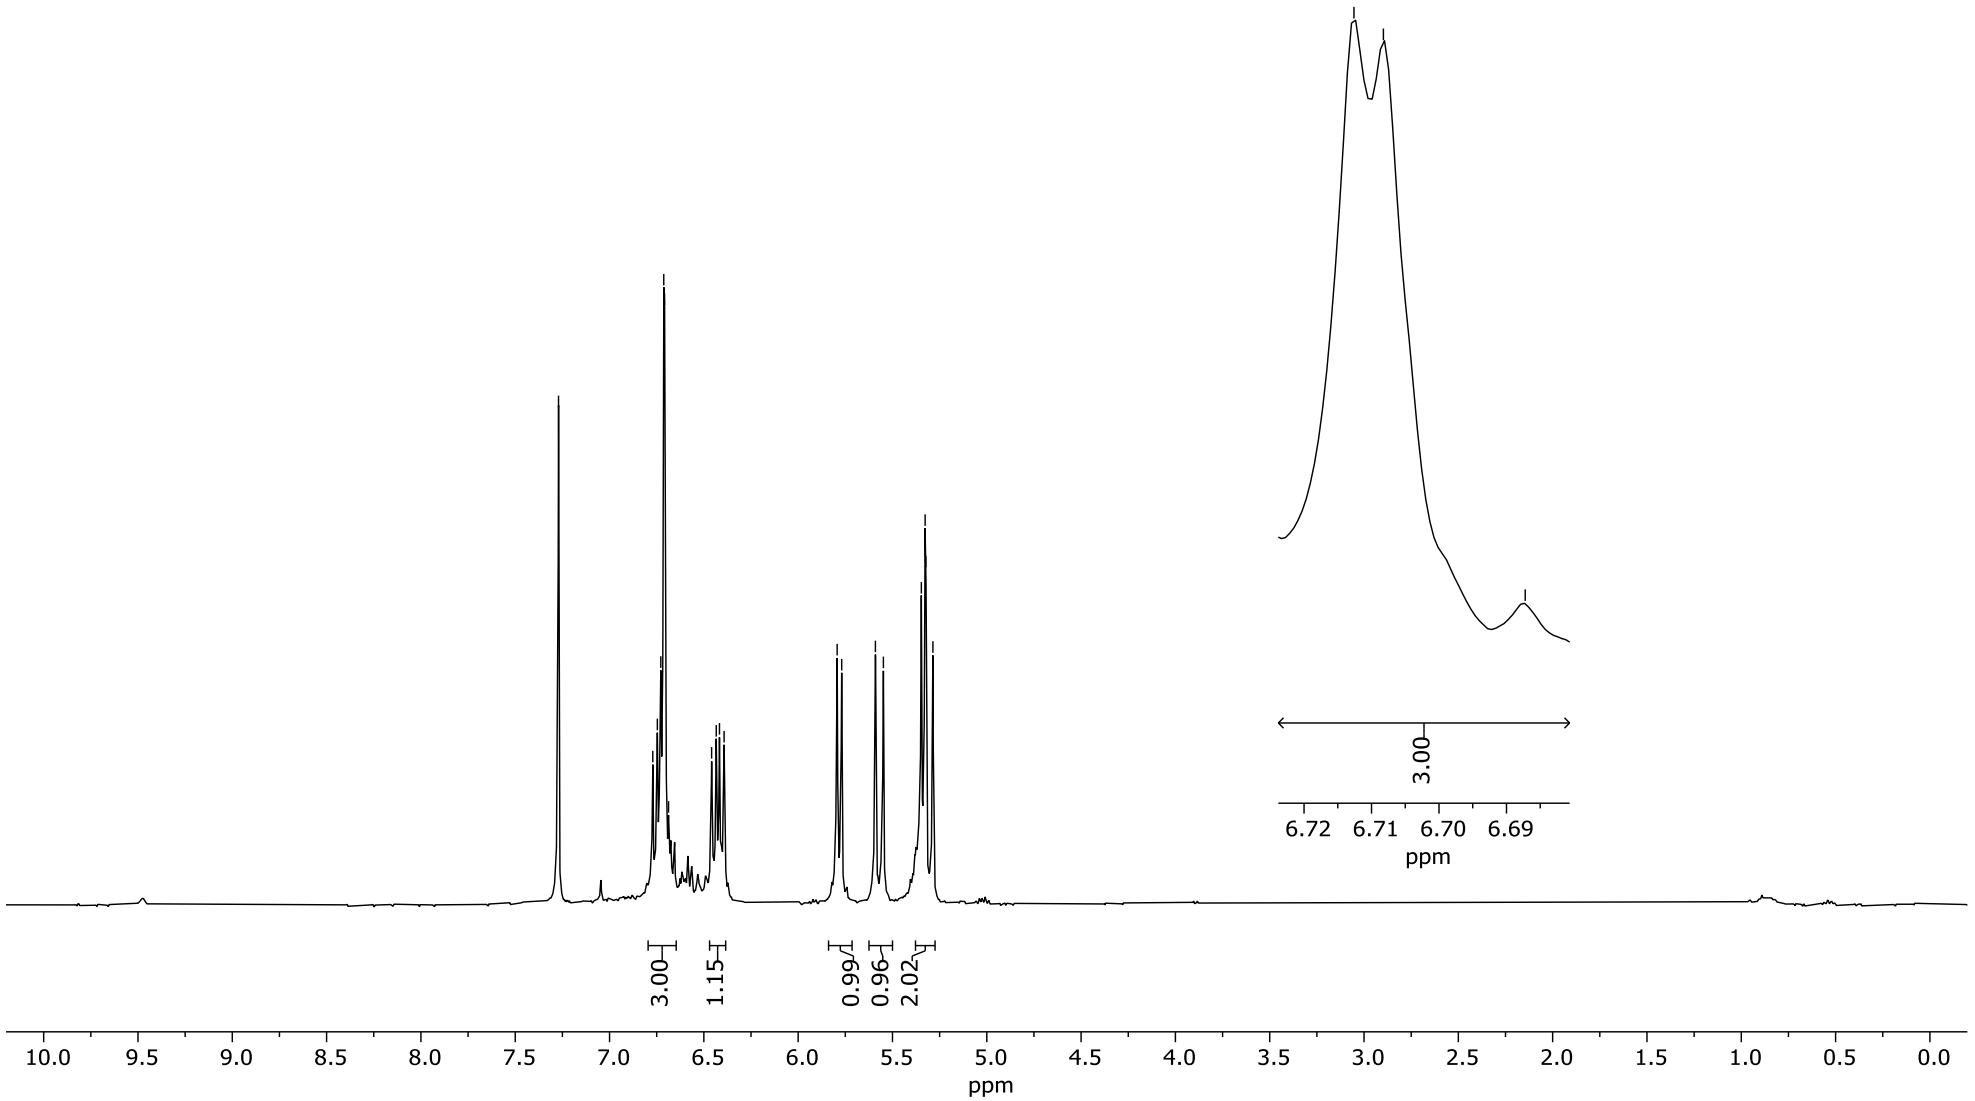

<sup>1</sup>H NMR spectrum of vinyl (Z)-2-(vinylselanyl)ethenyl sulfide (4a)

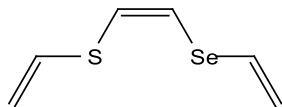

— 129.78  
— 125.79  
— 125.68  
— 120.54  
— 118.85  
— 113.91

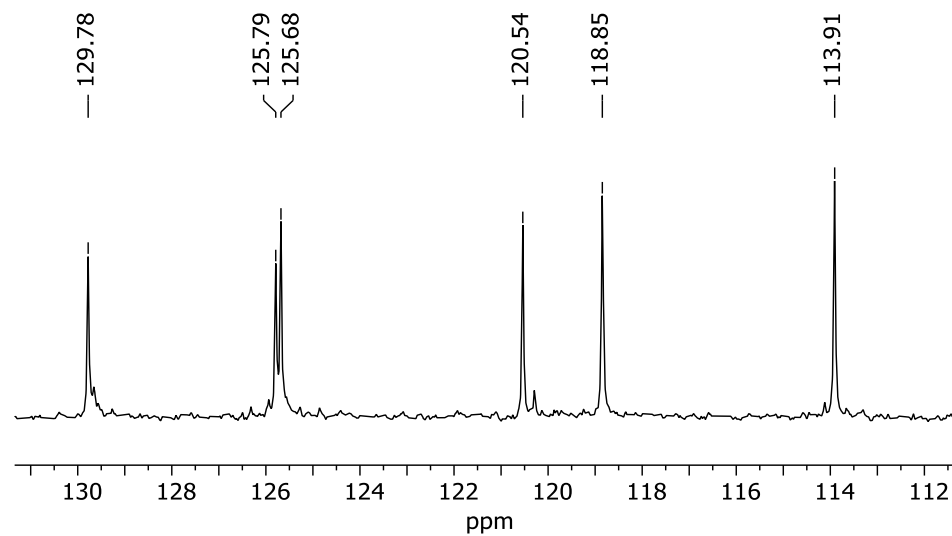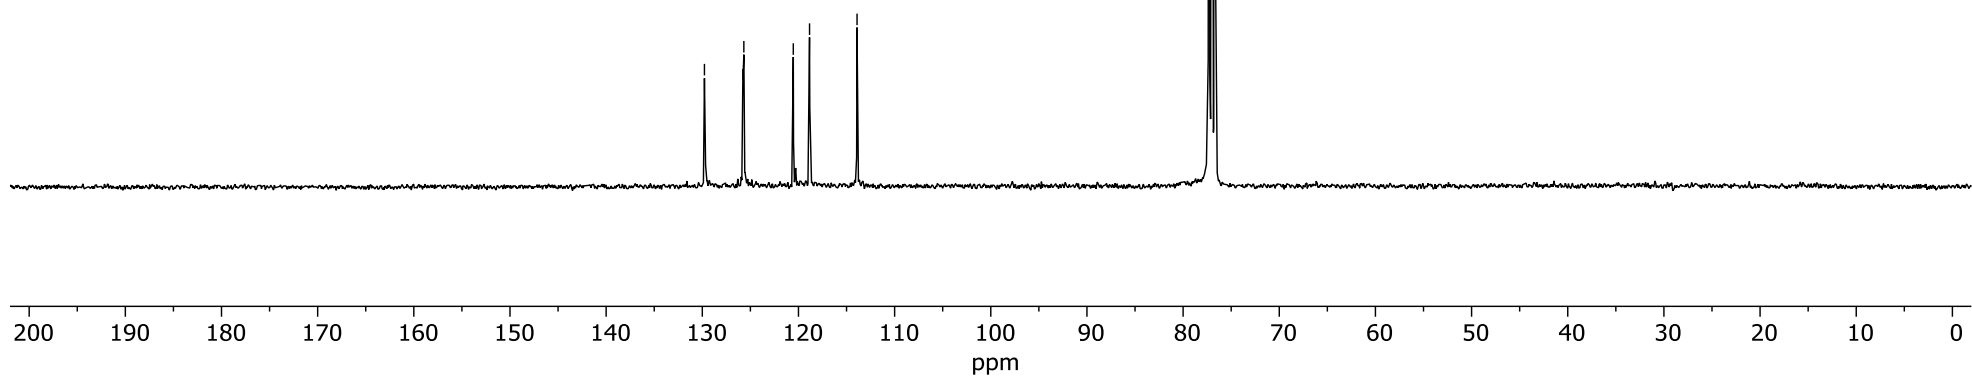

**<sup>13</sup>C NMR spectrum of vinyl (Z)-2-(vinylselanyl)ethenyl sulfide (4a)**



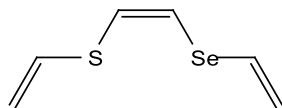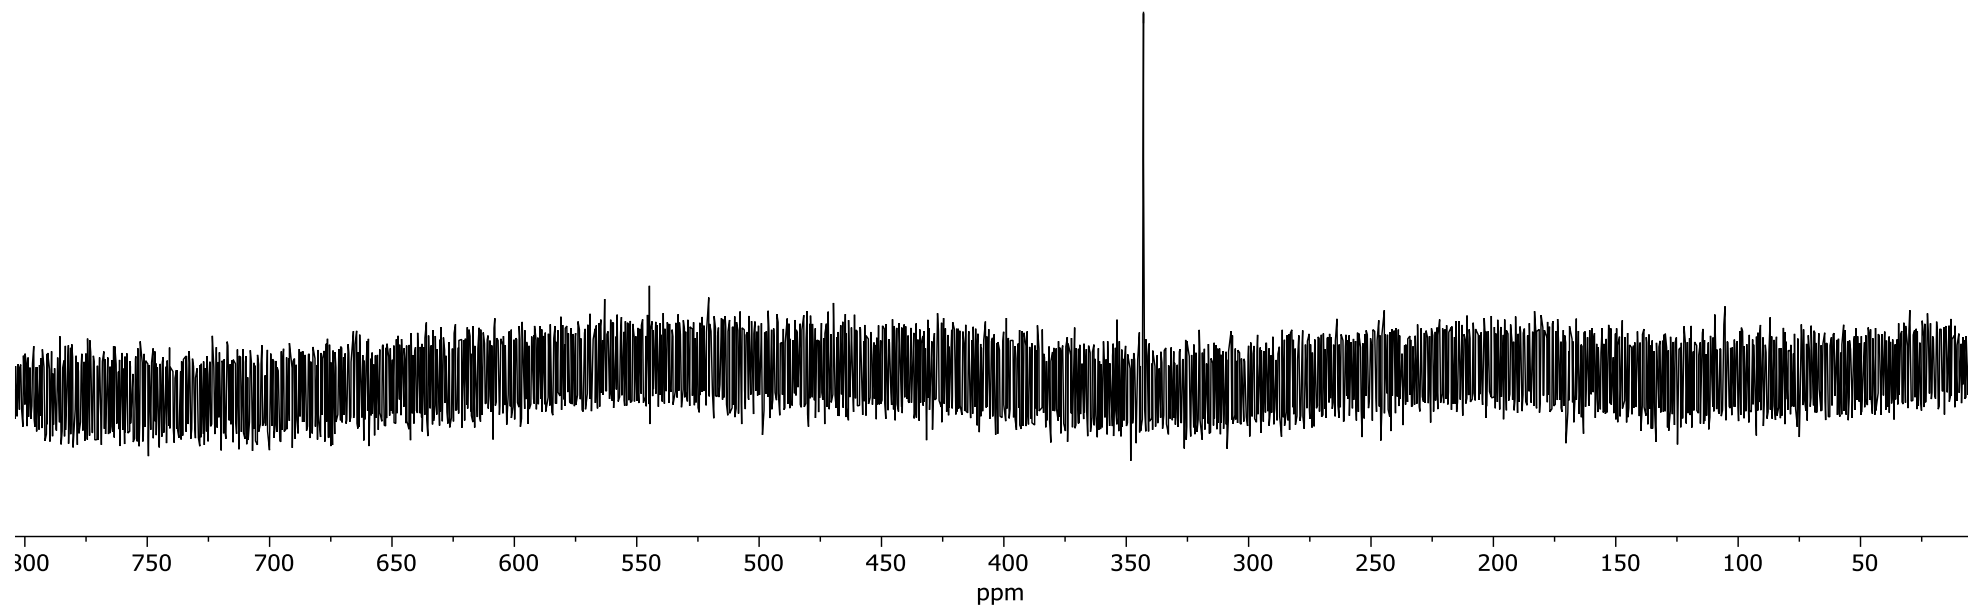

$^{77}\text{Se}$  NMR spectrum of vinyl (Z)-2-(vinylselanyl)ethenyl sulfide (4a)

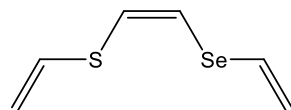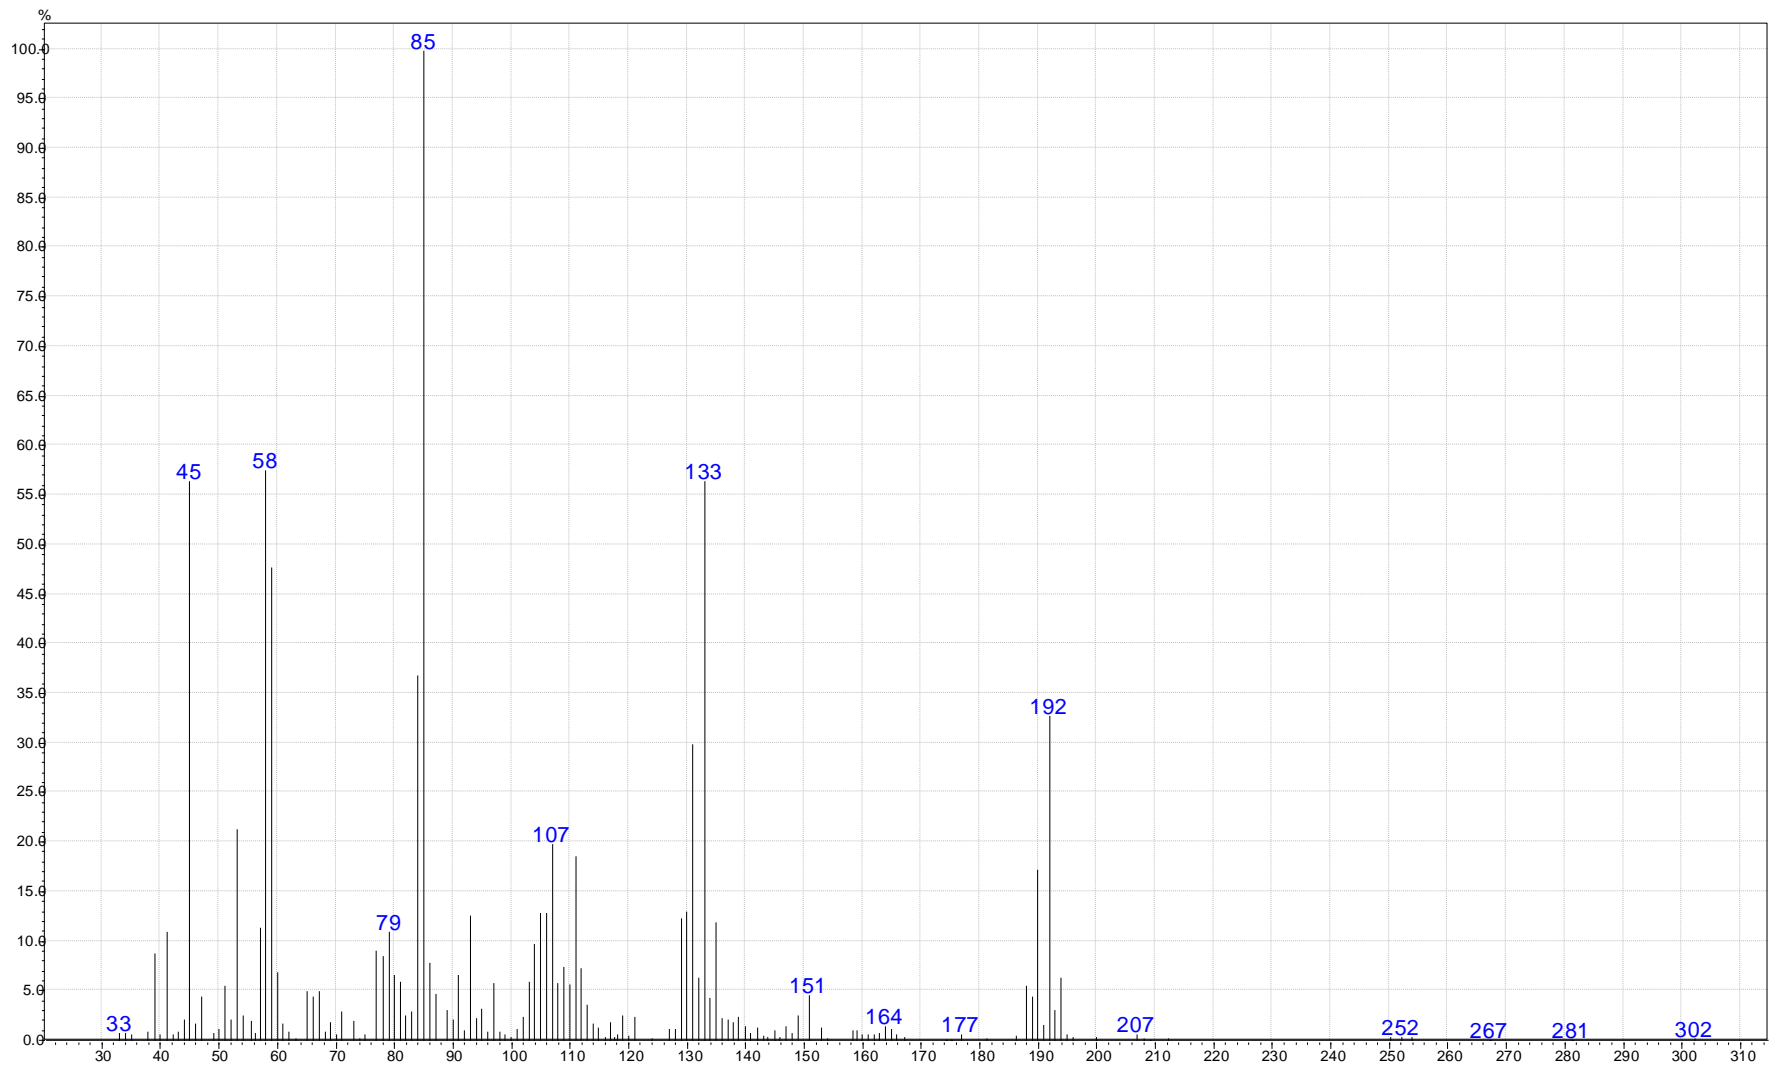

Mass-spectrum of vinyl (Z)-2-(vinylselanyl)ethenyl sulfide (4a)

<sup>1</sup>H

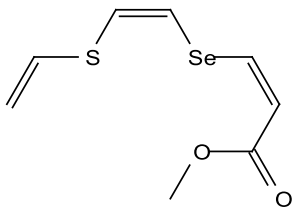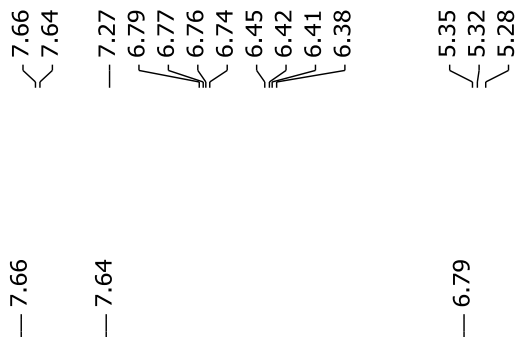

7.65 (d, 1H, C(O)CH=CHSe, <sup>3</sup>J = 9.4 Hz)

6.78 (d, 1H, SCH=CHSe, <sup>3</sup>J = 8.5 Hz)

6.40 (d, 1H, C(O)CH=CHSe, <sup>3</sup>J = 9.4 Hz)

6.75 (d, 1H, SCH=CHSe, <sup>3</sup>J = 8.5 Hz)

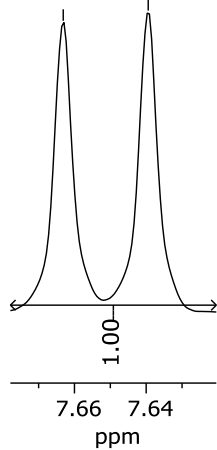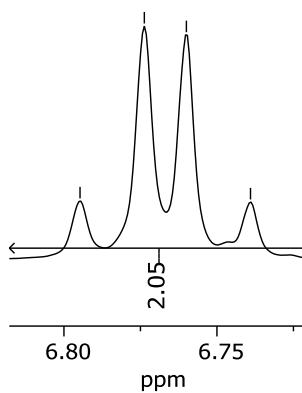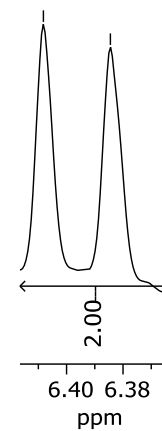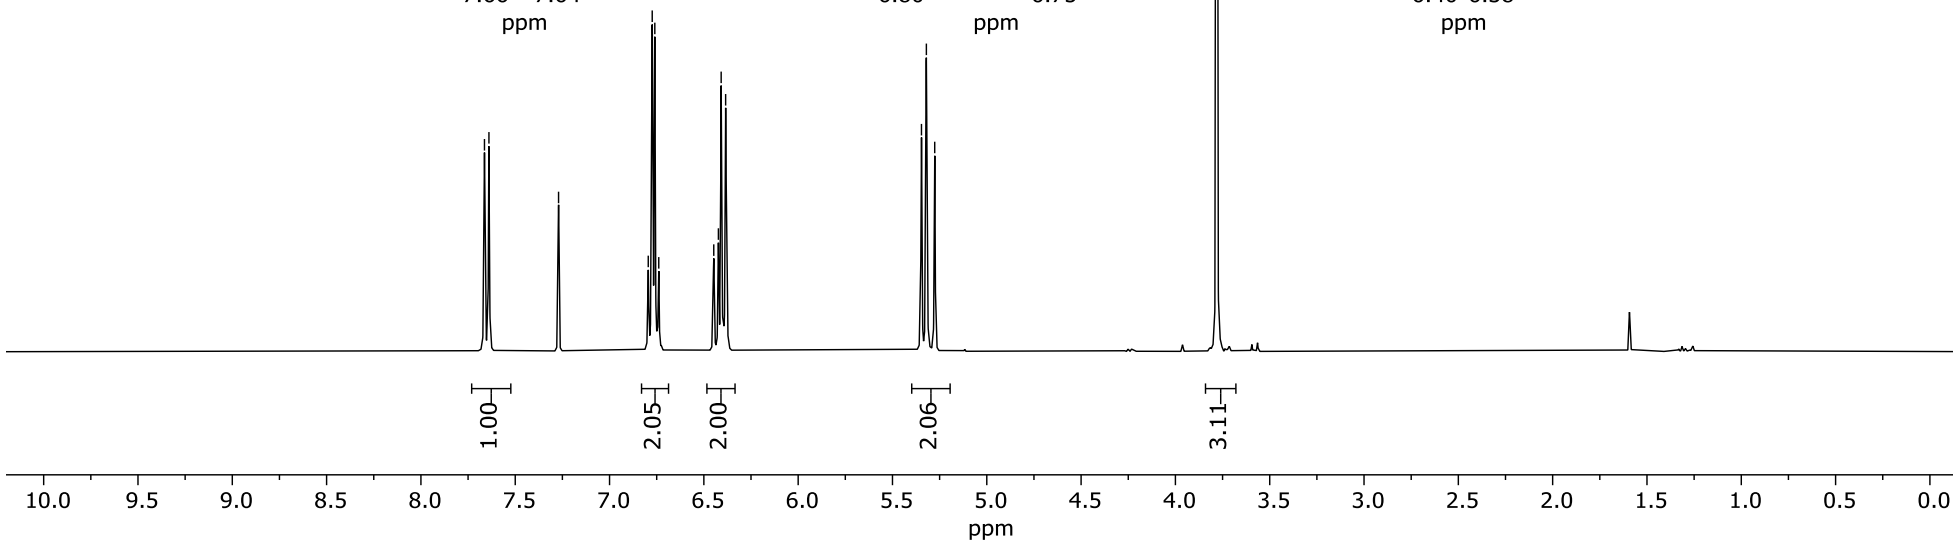

<sup>1</sup>H NMR spectrum of methyl (Z)-3-[(Z)-2-(vinylsulfanyl)ethenyl]selenyl-2-propenoate (4b)

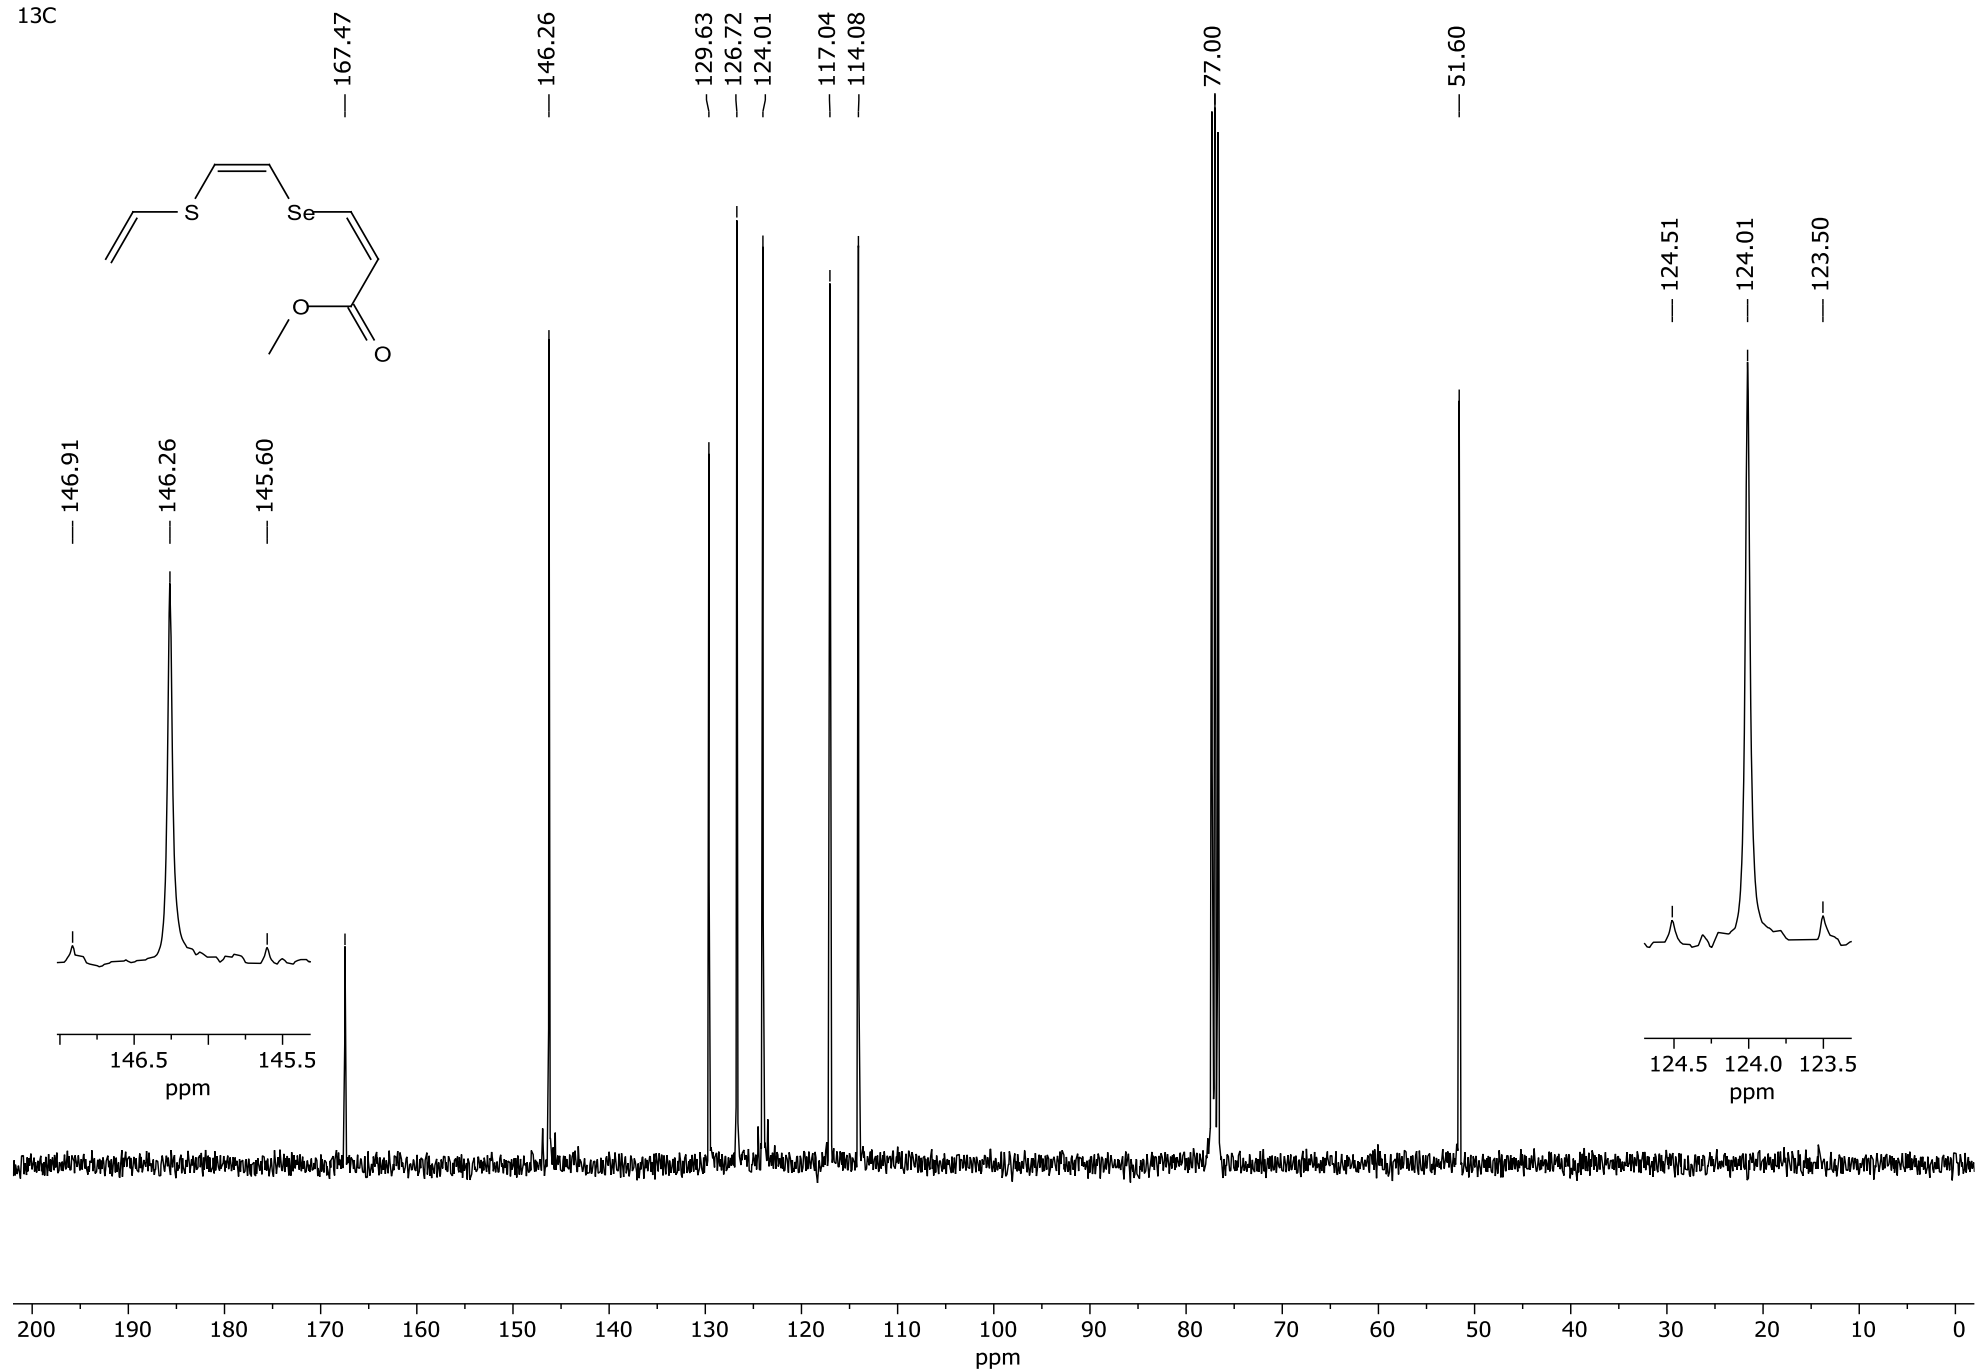

<sup>13</sup>C NMR spectrum of methyl (Z)-3-[(Z)-2-(vinylsulfanyl)ethenyl]selanyl-2-propenoate (4b)

<sup>77</sup>Se

434.94

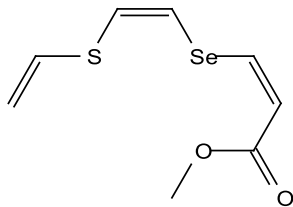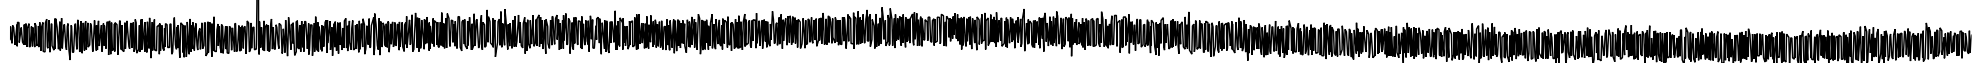

500 450 400 350 300 250 200 150 100 50 0 -50 -100 -150 -200 -250  
ppm

<sup>77</sup>Se NMR spectrum of methyl (Z)-3-[(Z)-2-(vinylsulfanyl)ethenyl]selanyl-2-propenoate (4b)

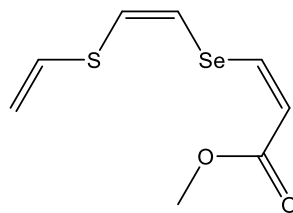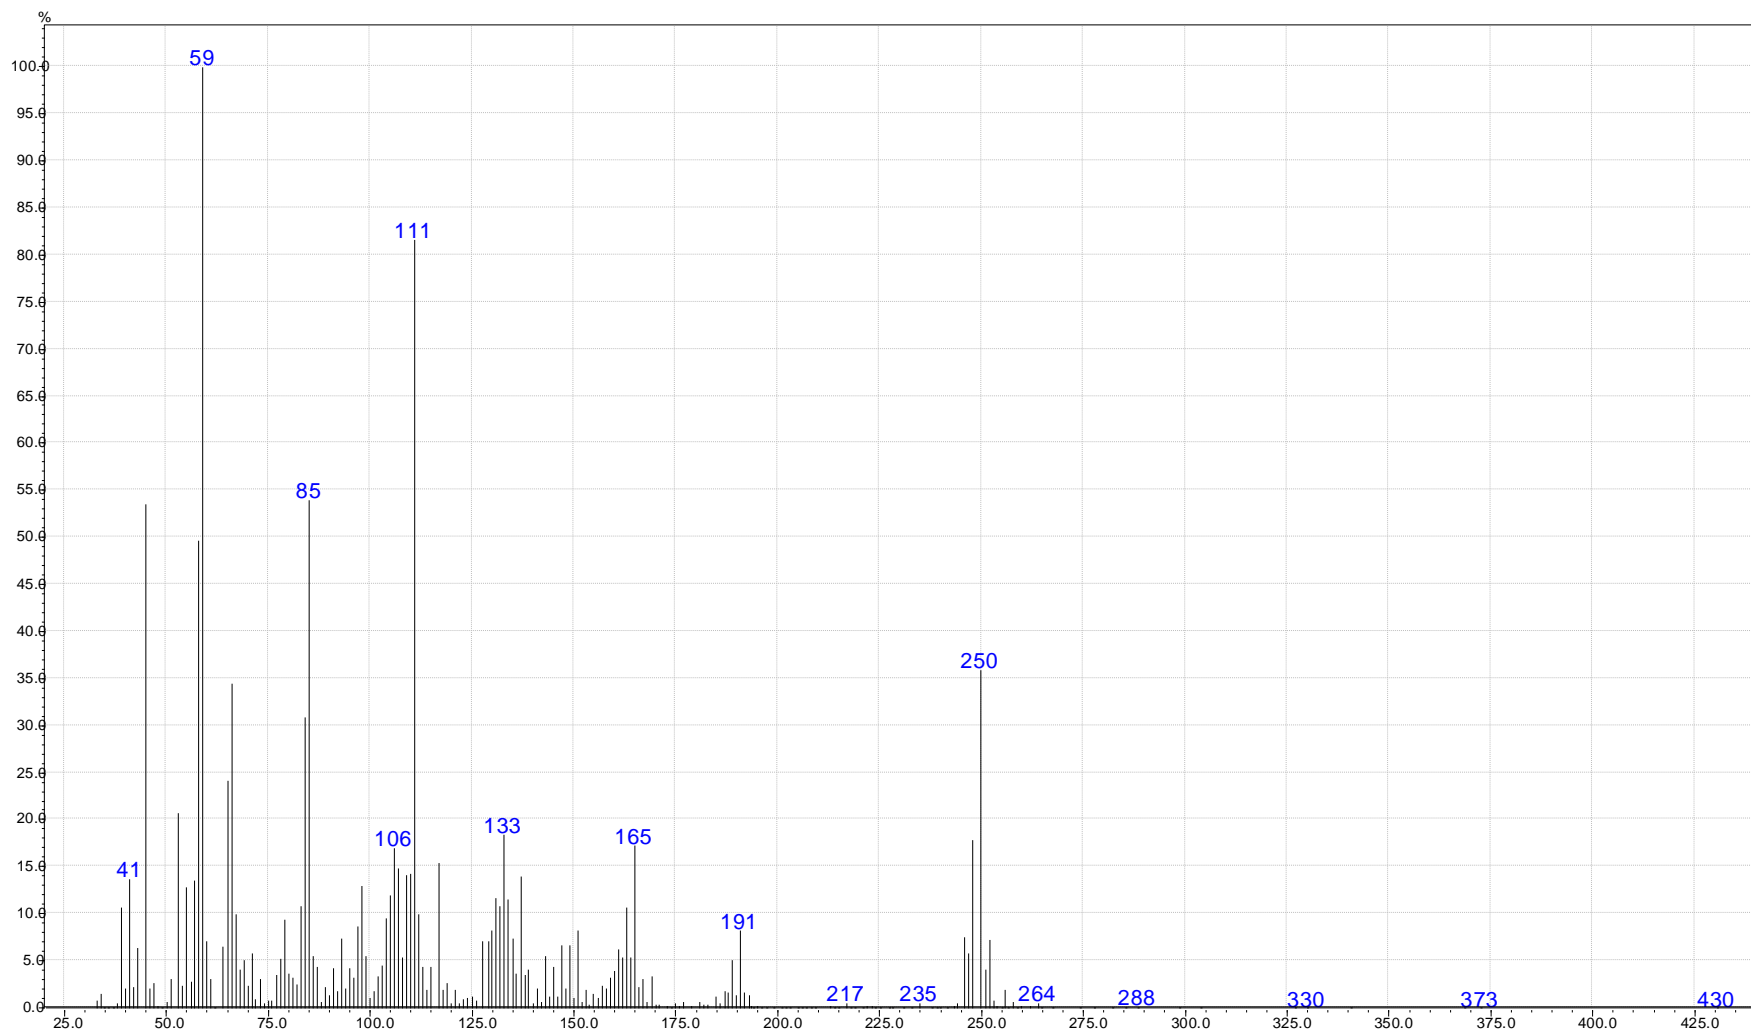

Mass-spectrum of methyl (Z)-3-[(Z)-2-(vinylsulfanyl)ethenyl]selanyl-2-propenoate (4b)

<sup>1</sup>H

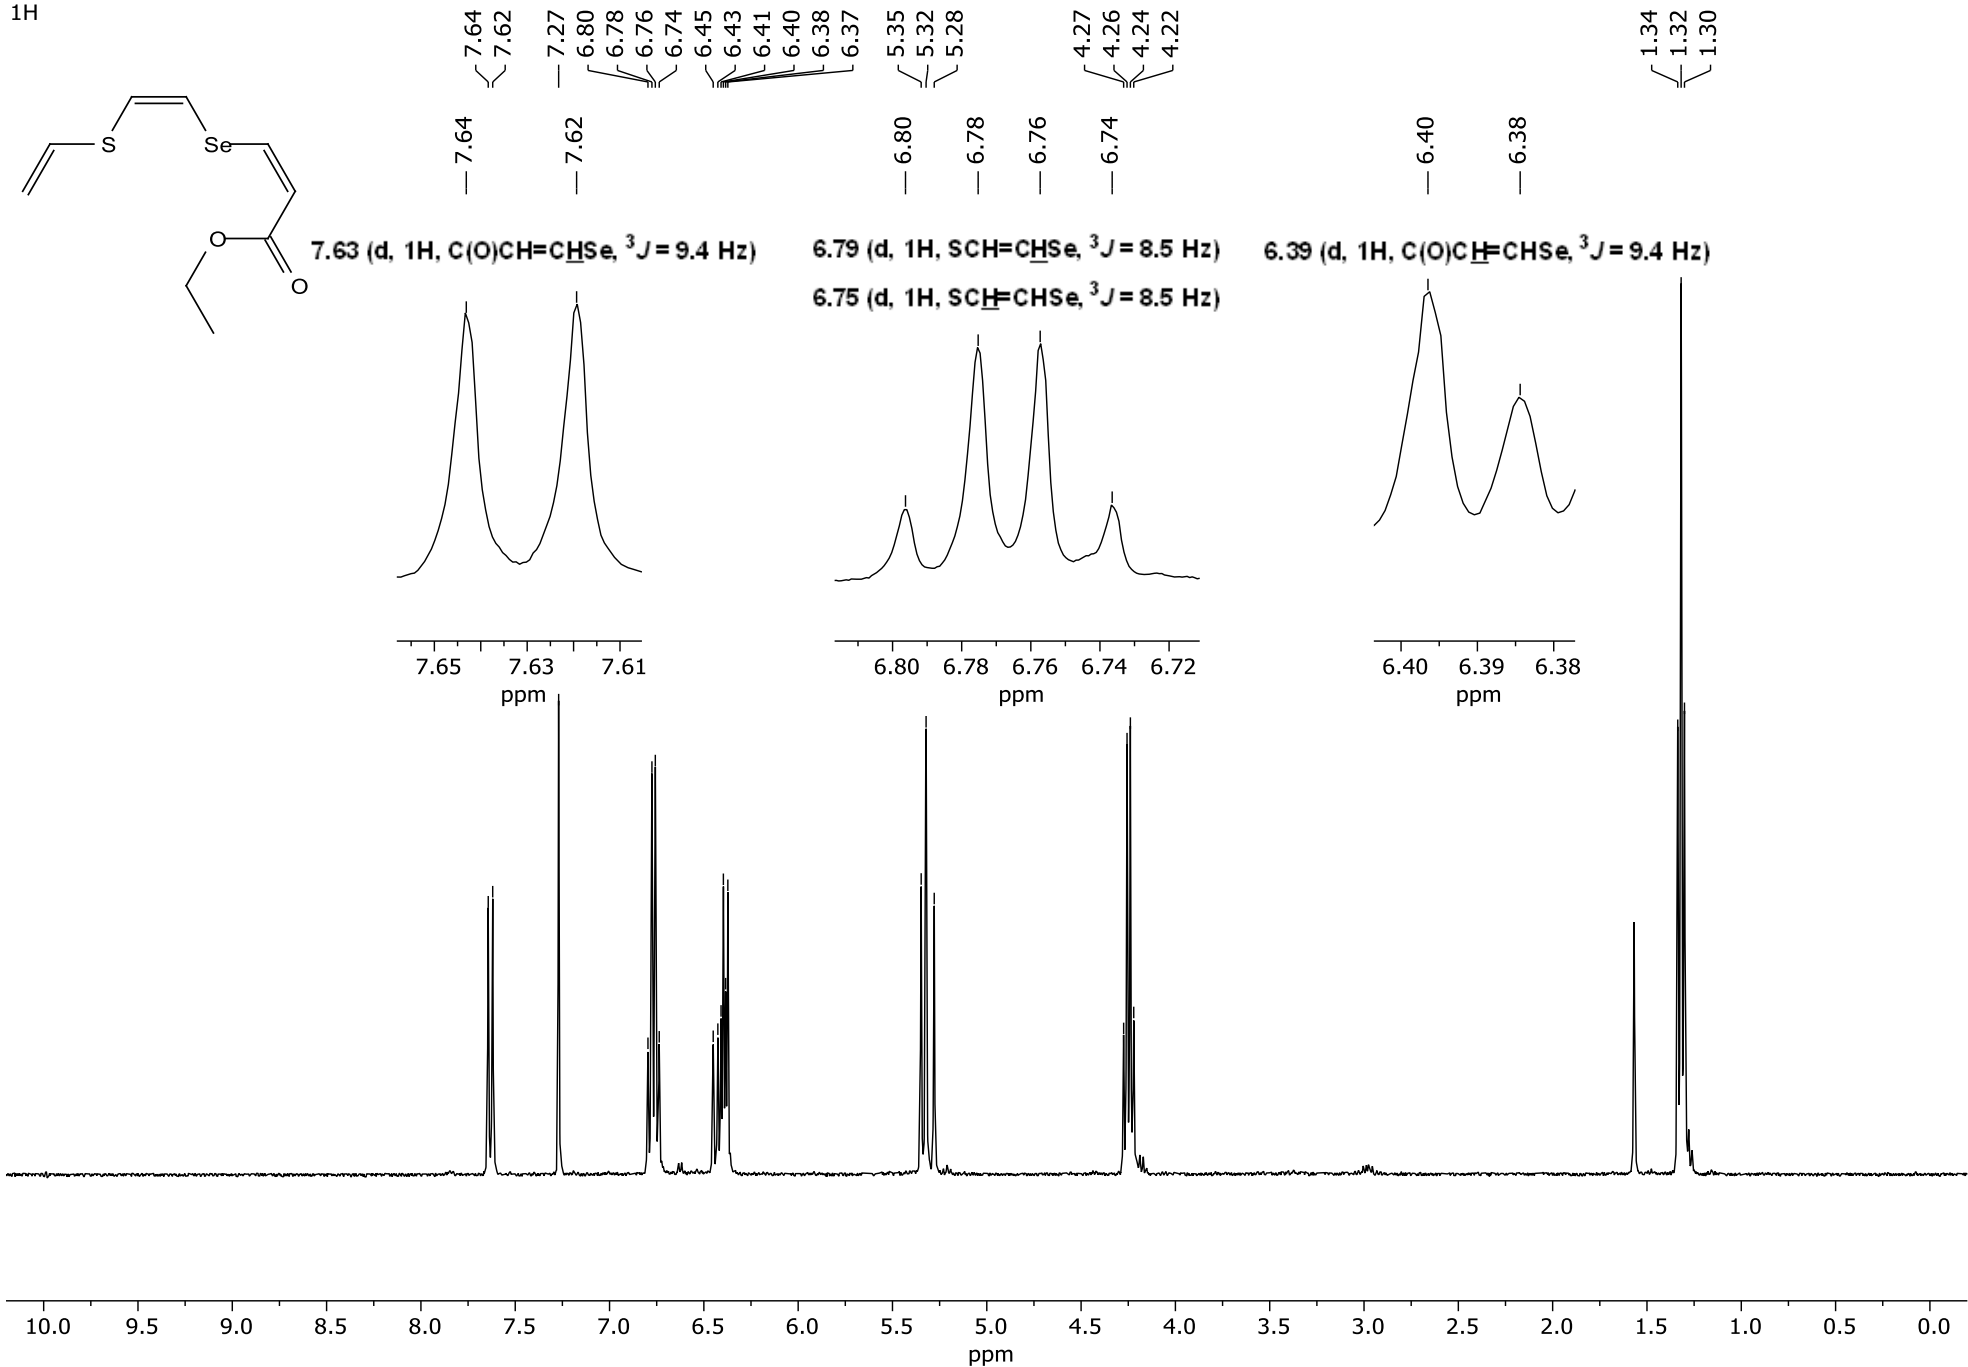

<sup>1</sup>H NMR spectrum of ethyl (Z)-3-[(Z)-2-(vinylsulfanyl)ethenyl]selanyl-2-propenoate (4c)

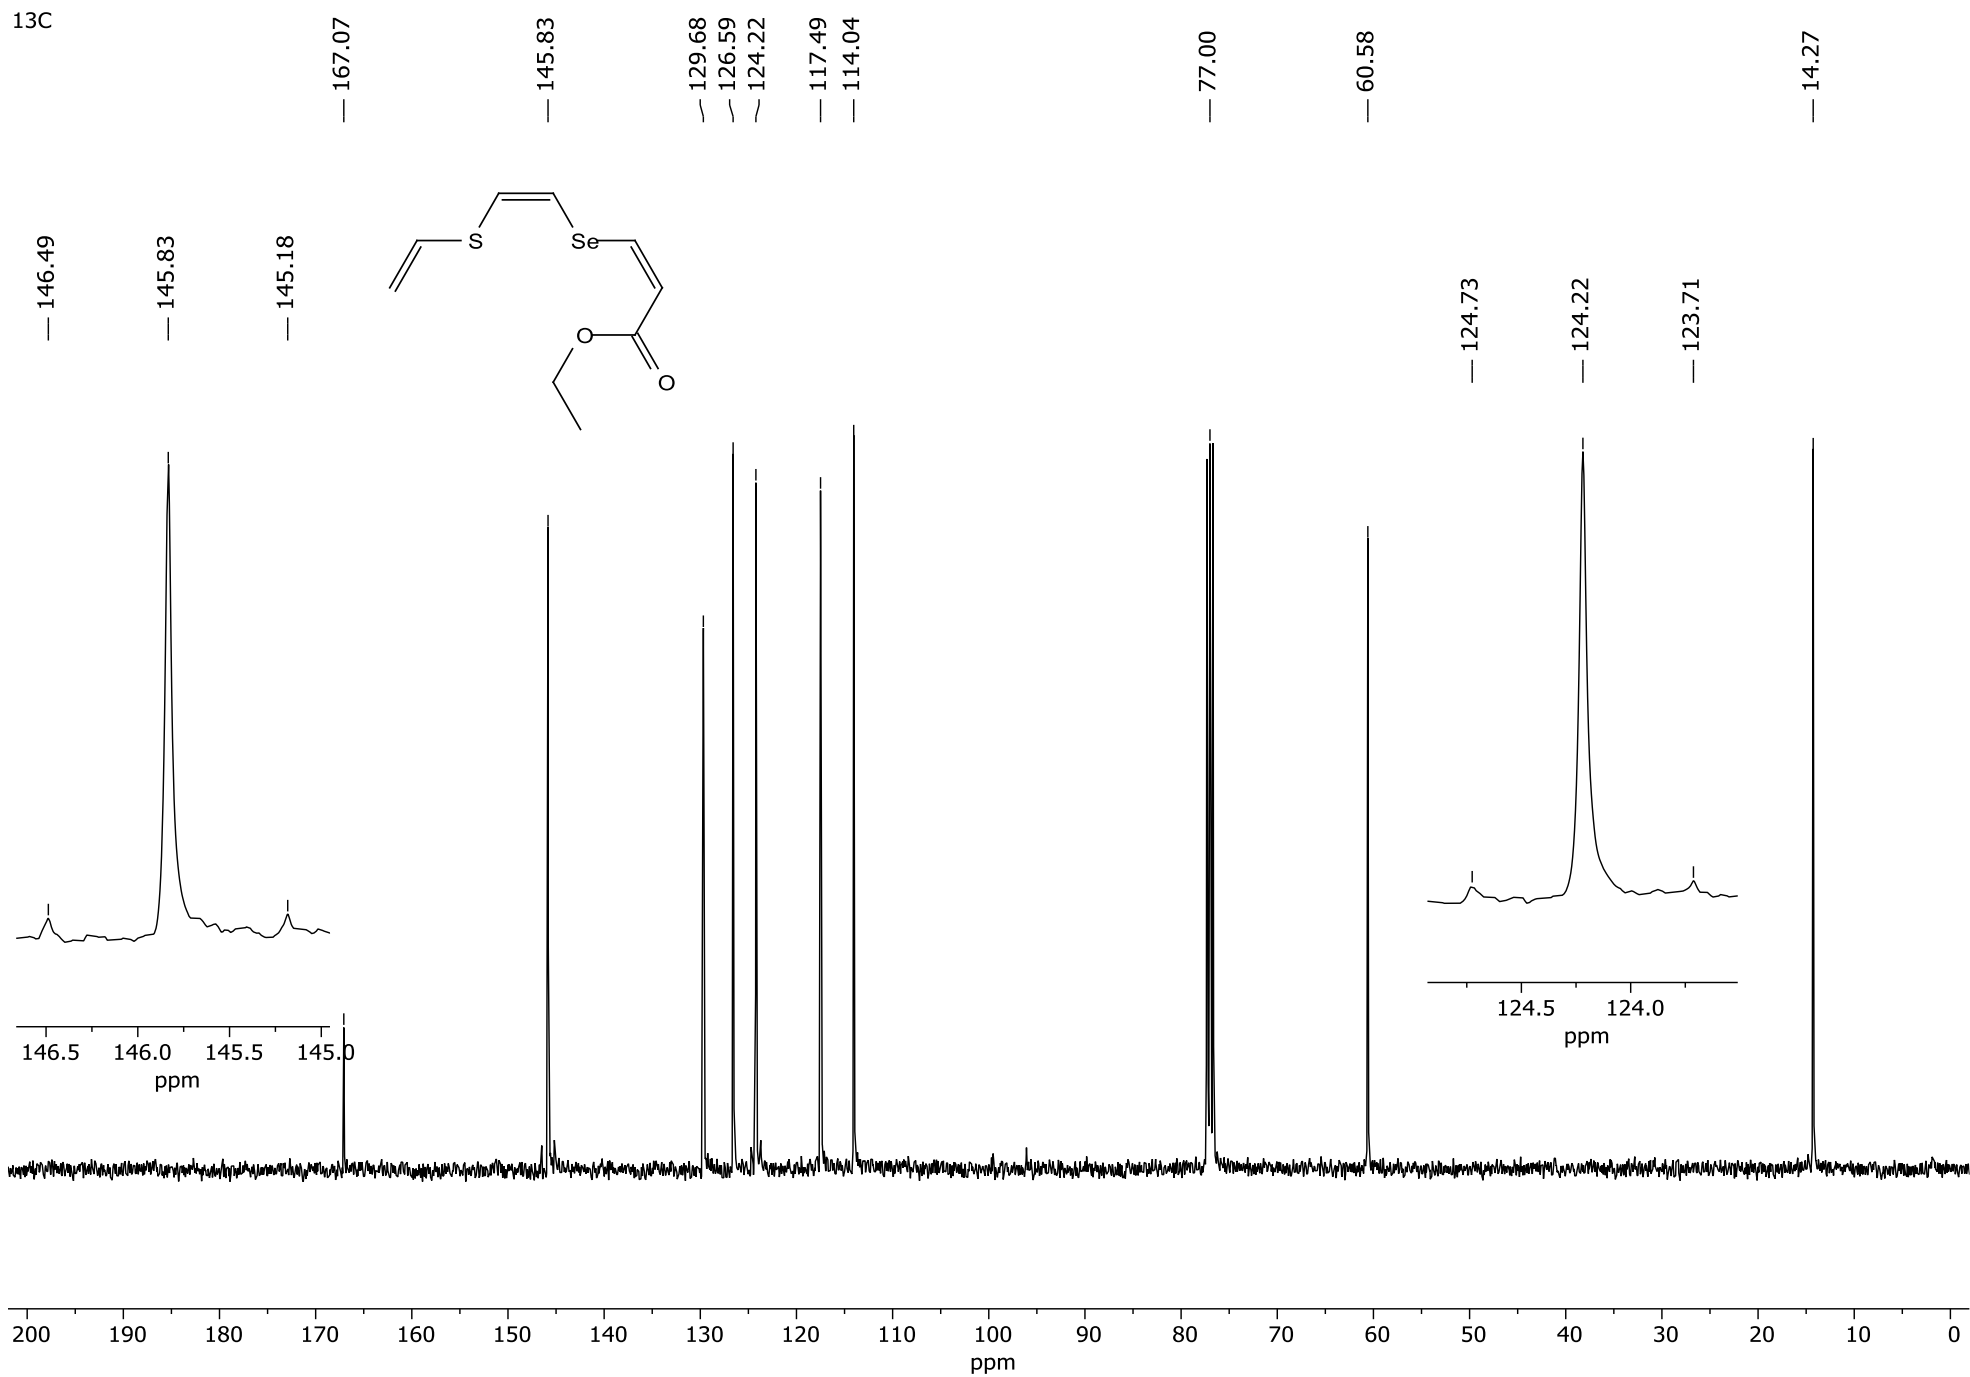

<sup>13</sup>C NMR spectrum of ethyl (Z)-3-[[*Z*]-2-(vinylsulfanyl)ethenyl]selanyl]-2-propenoate (**4c**)



<sup>77</sup>Se

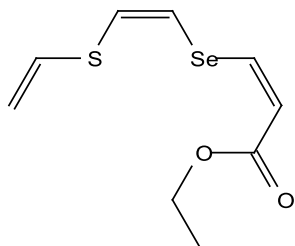

— 434.08

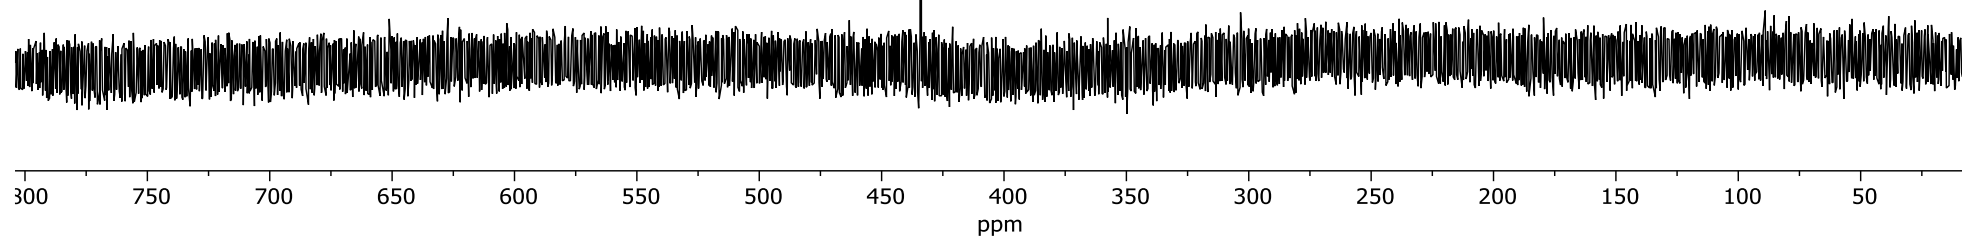

<sup>77</sup>Se NMR spectrum of ethyl (Z)-3-([(Z)-2-(vinylsulfanyl)ethenyl]selanyl)-2-propenoate (4c)

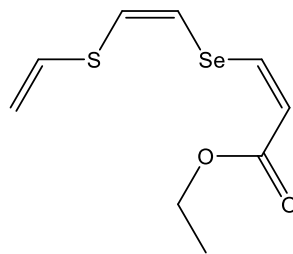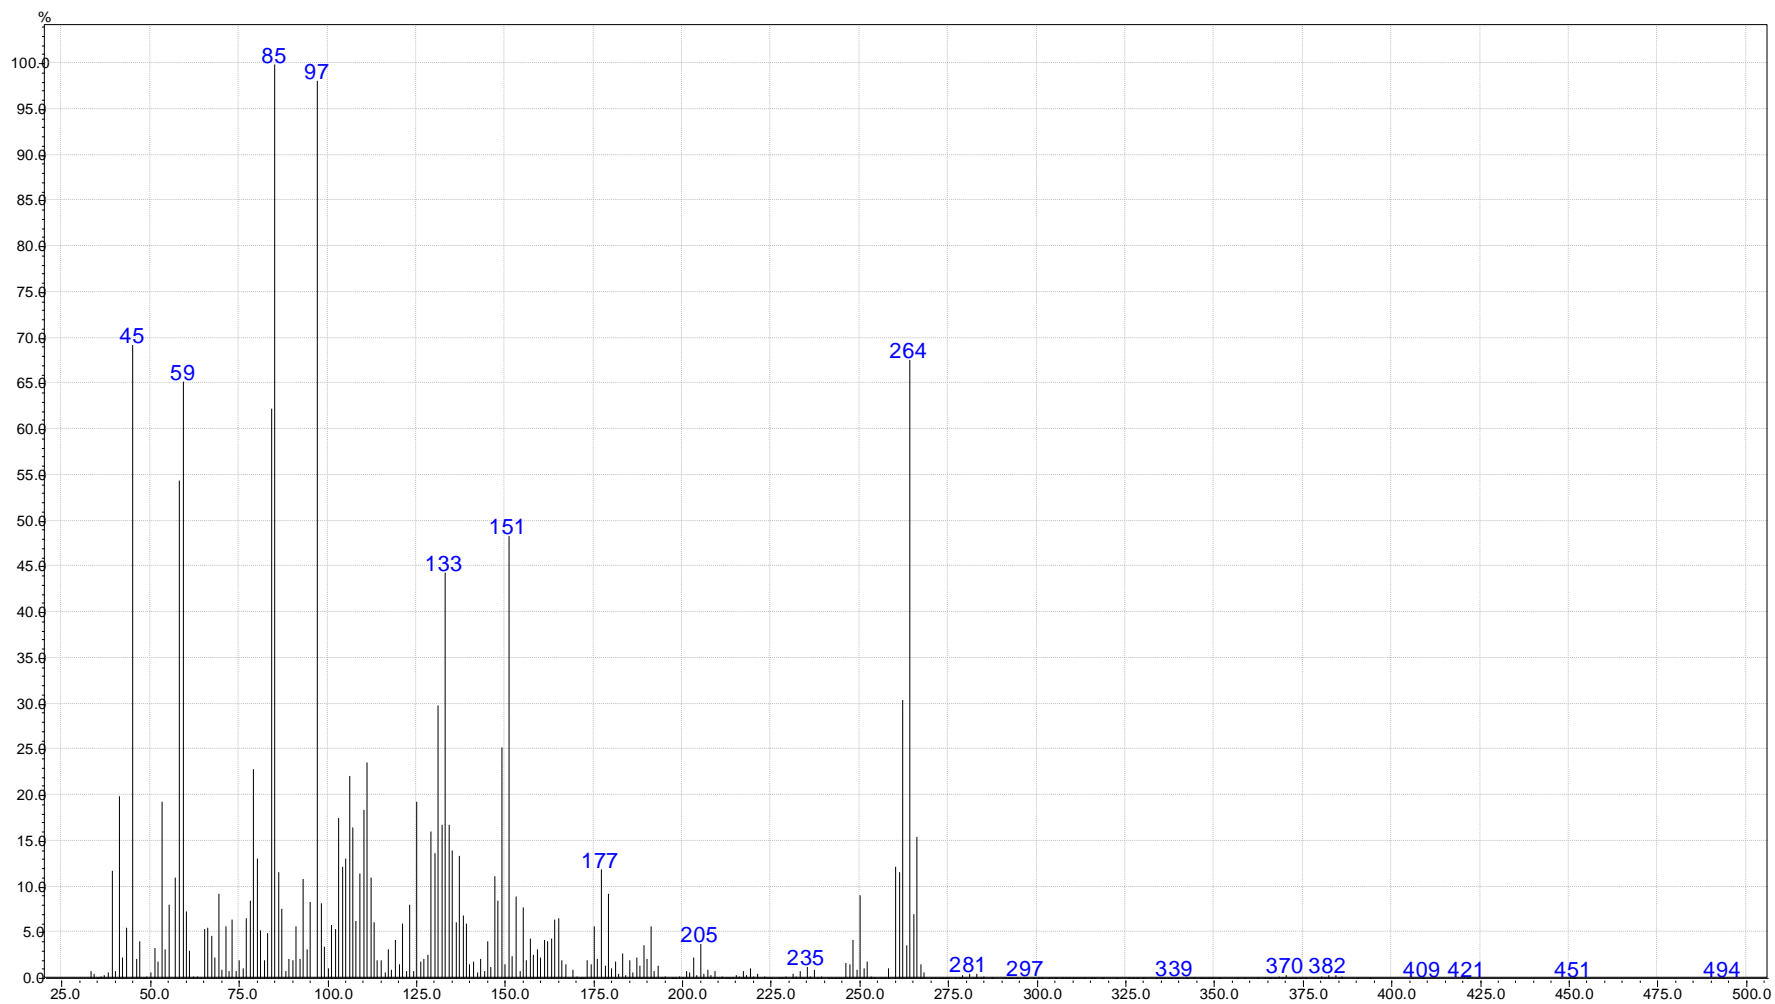

Mass-spectrum of ethyl (Z)-3-[[Z]-2-(vinylsulfanyl)ethenyl]selanyl-2-propenoate (4c)

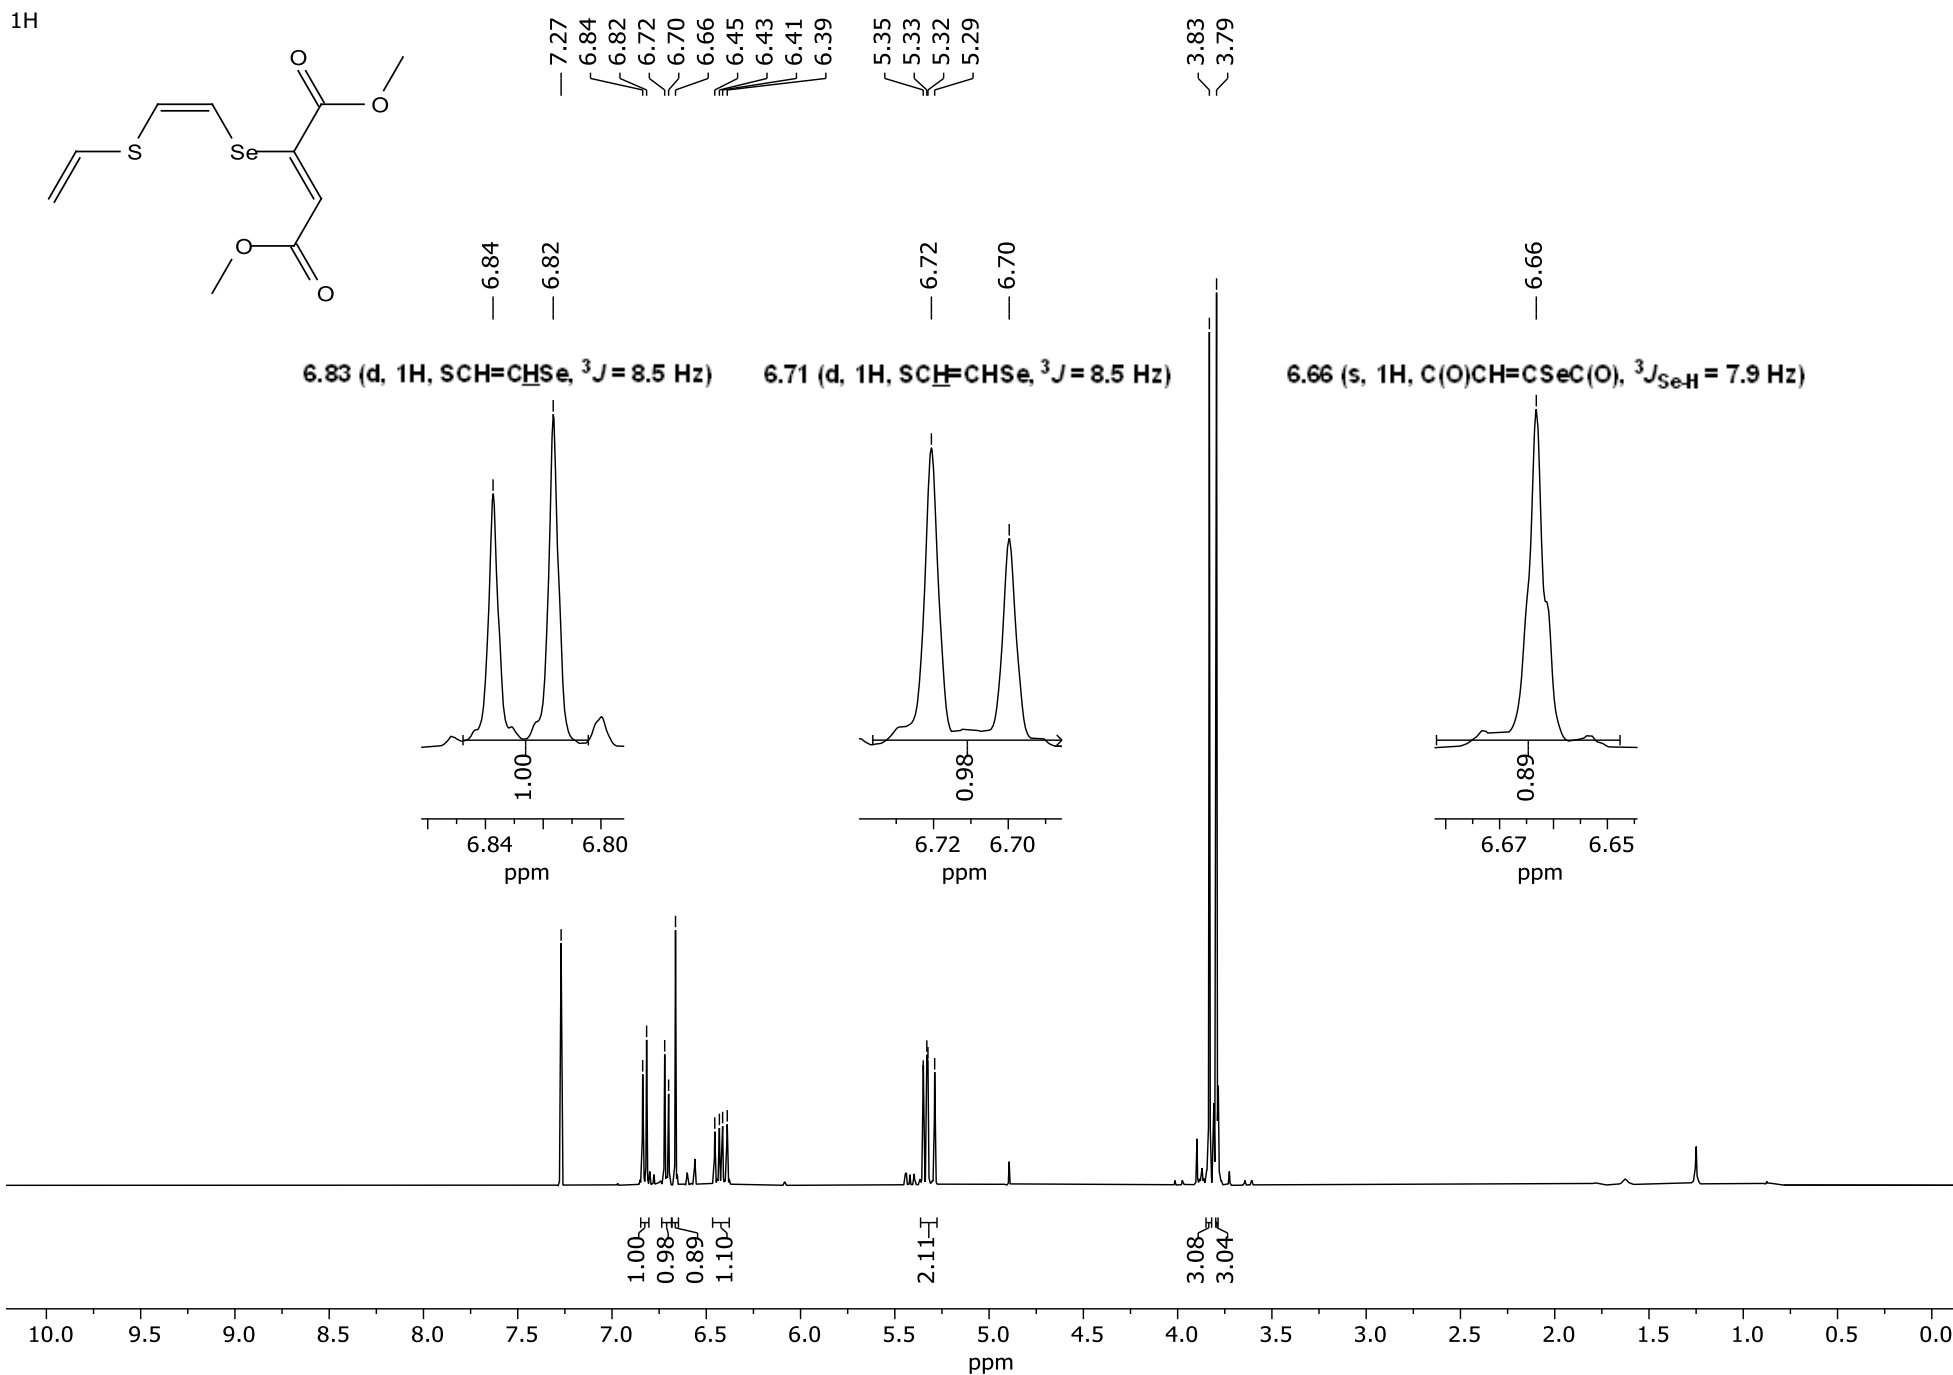

<sup>1</sup>H NMR spectrum of dimethyl (Z,Z)-2-[[2-(vinylsulfanyl)ethenyl]selanyl]-2-butenedioate (5a) (Z,Z)

13C

166.21  
165.55

146.96

131.39  
129.71

120.65  
117.54  
114.52

77.00

52.96  
52.09

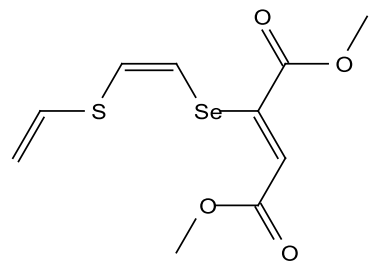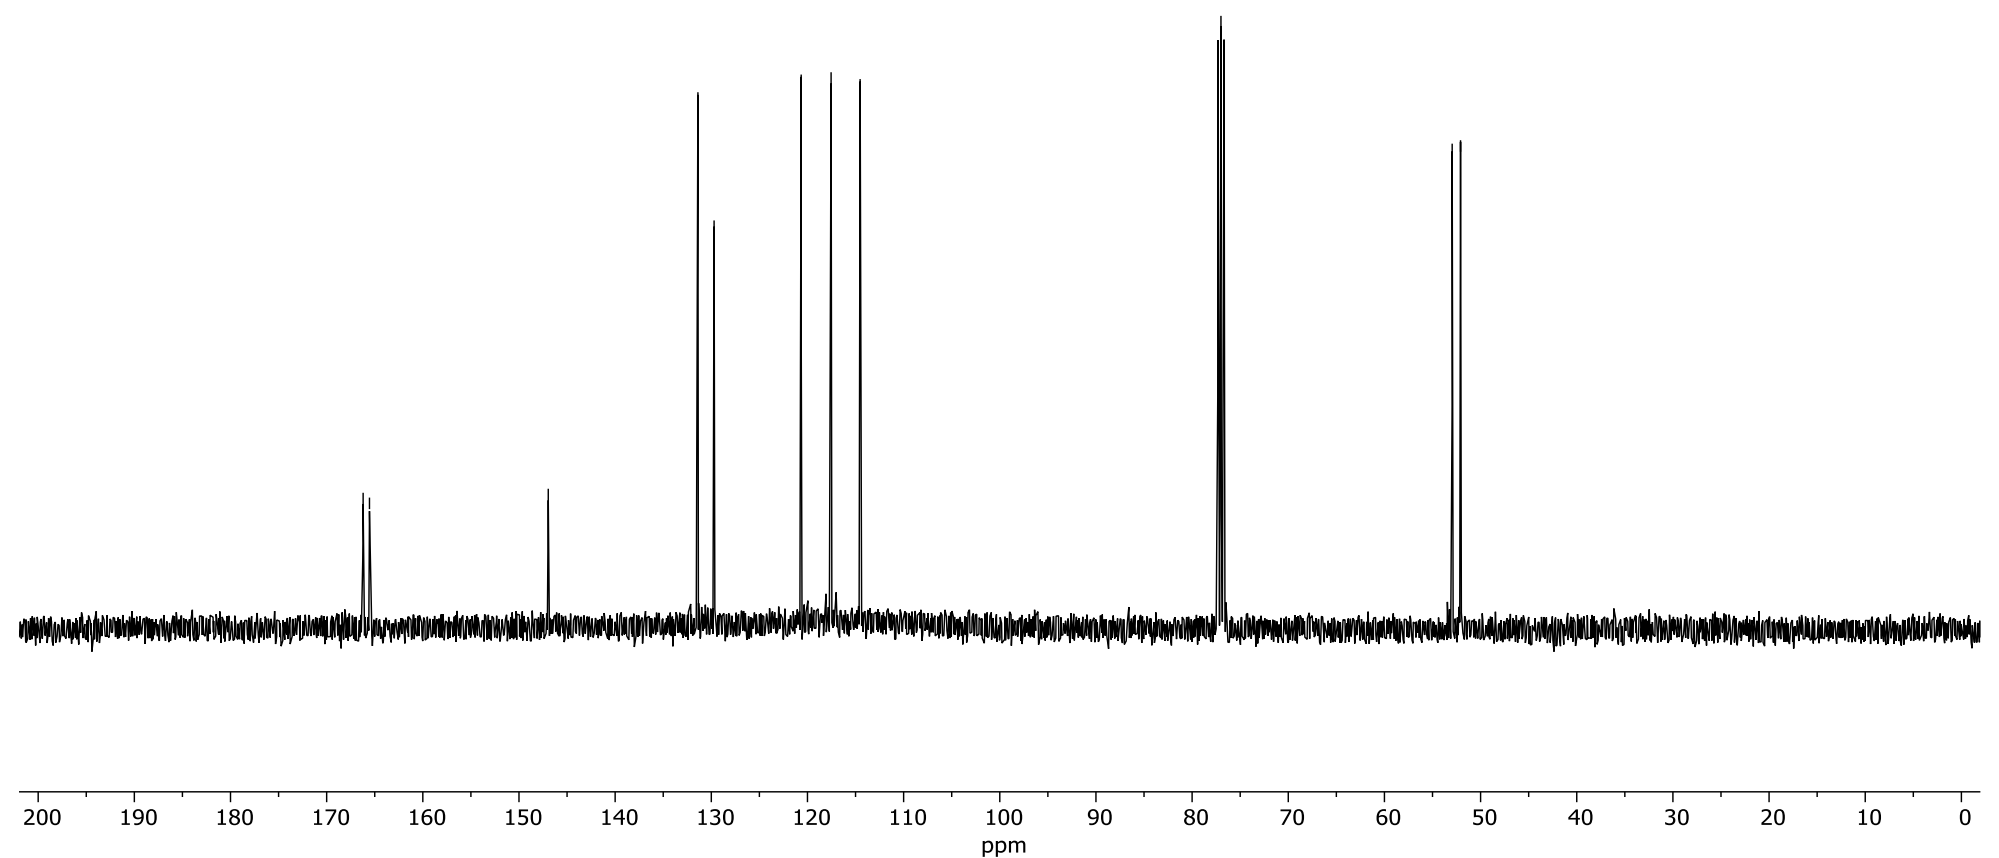

<sup>13</sup>C NMR spectrum of dimethyl (Z)-2-[(Z)-2-(vinylsulfanyl)ethenyl]selanyl-2-butenedioate (5a) (Z,Z)

— 421.10

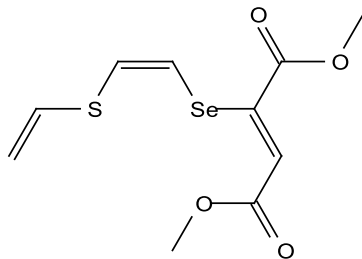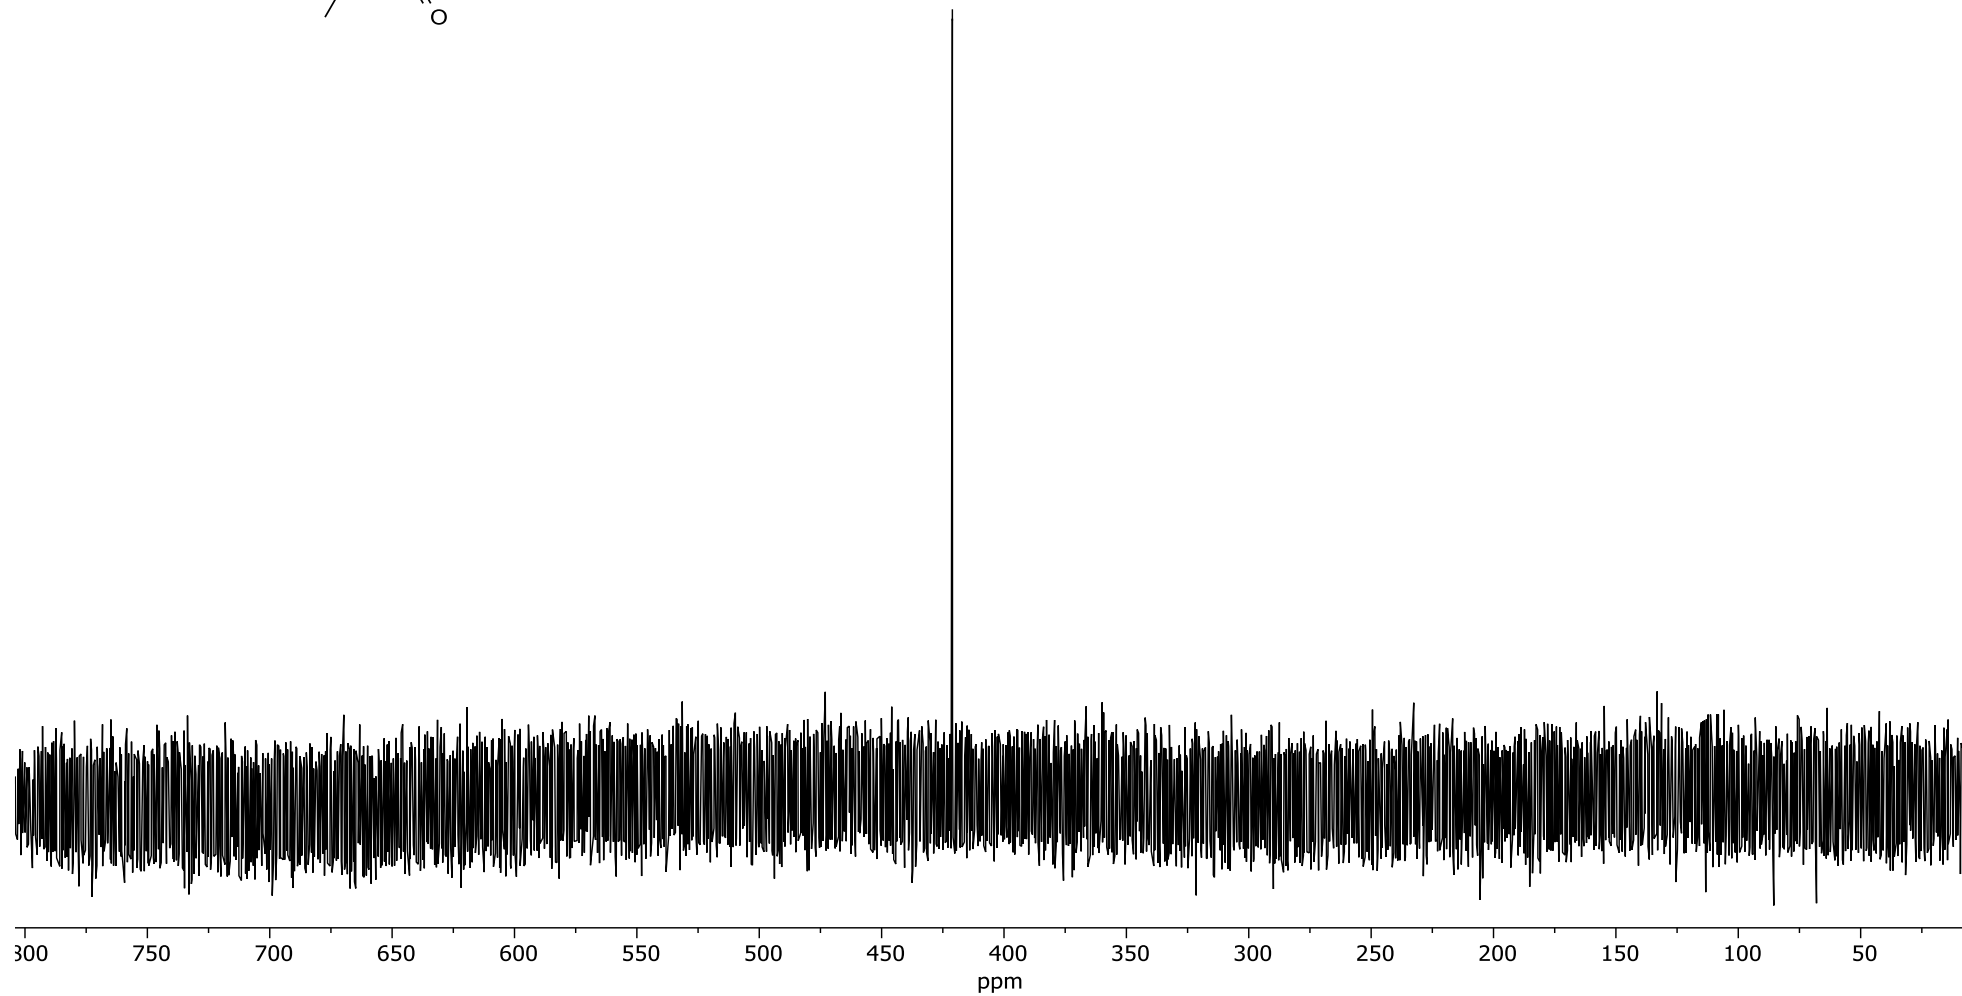

<sup>77</sup>Se NMR spectrum of dimethyl (Z)-2-[(Z)-2-(vinylsulfanyl)ethenyl]selanyl-2-butenedioate (5a) (Z,Z)

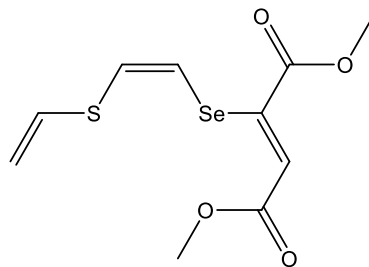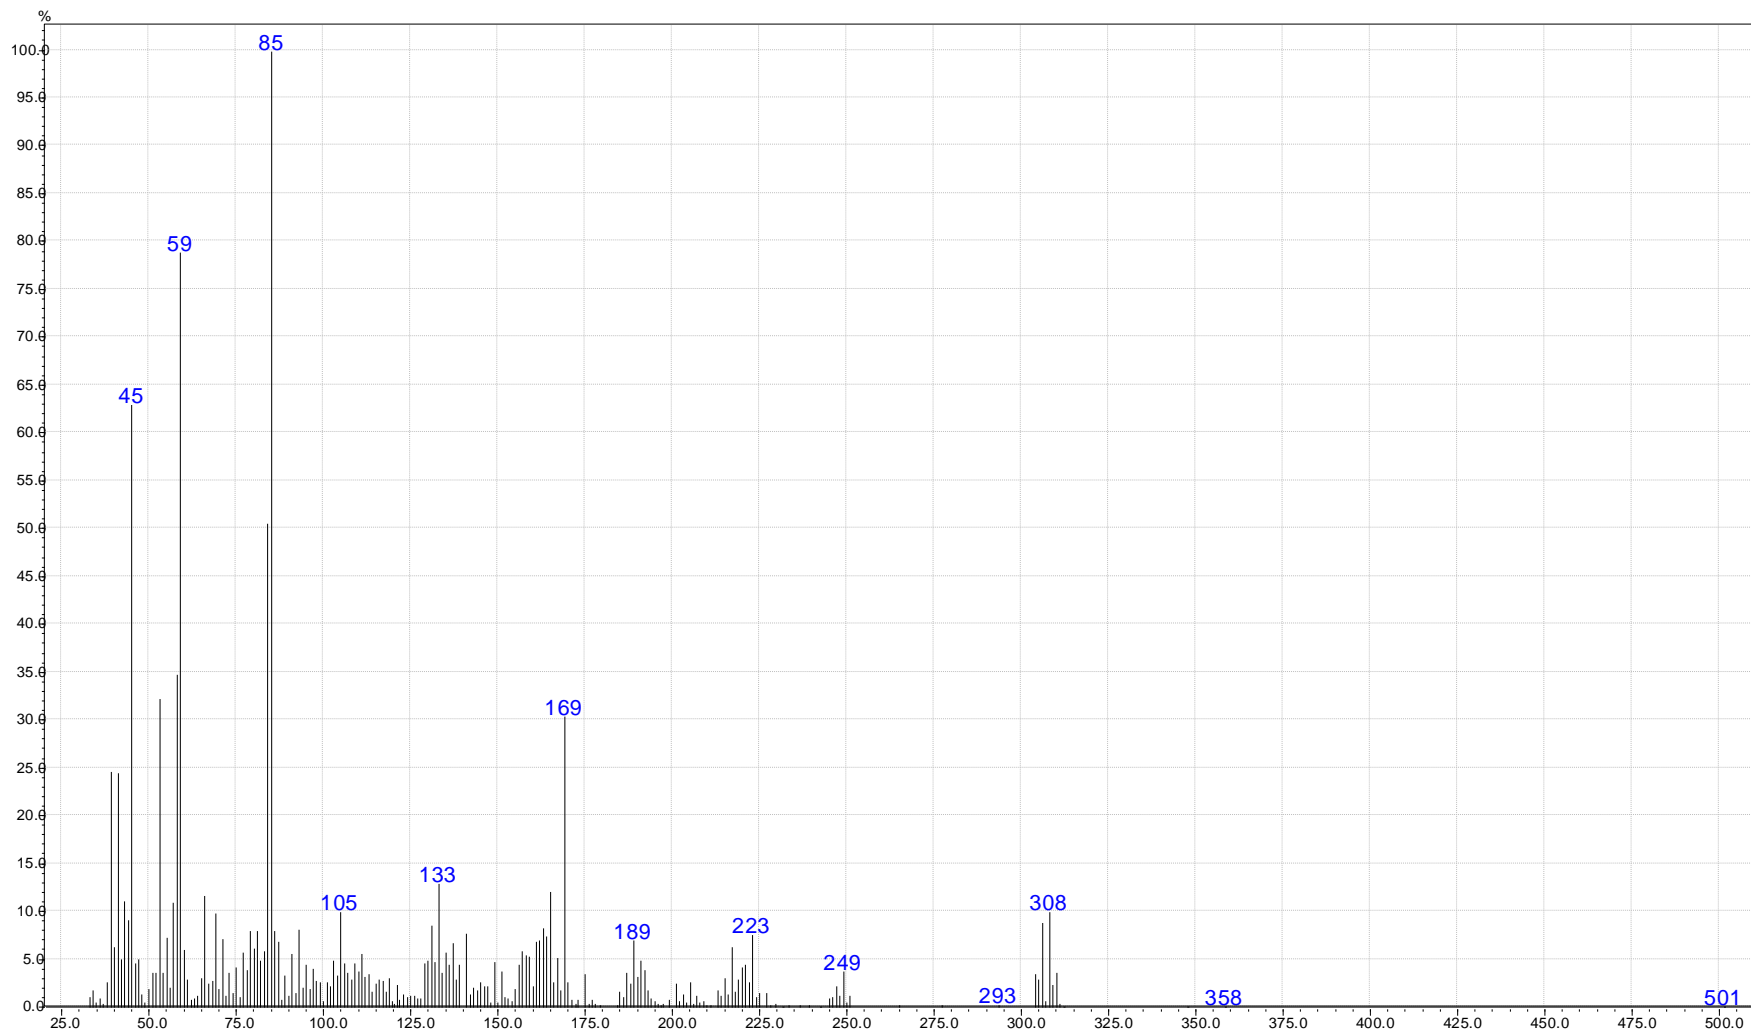

Mass-spectrum of dimethyl (Z)-2-[(Z)-2-(vinylsulfanyl)ethenyl]selanyl-2-butenedioate (5a)

<sup>1</sup>H

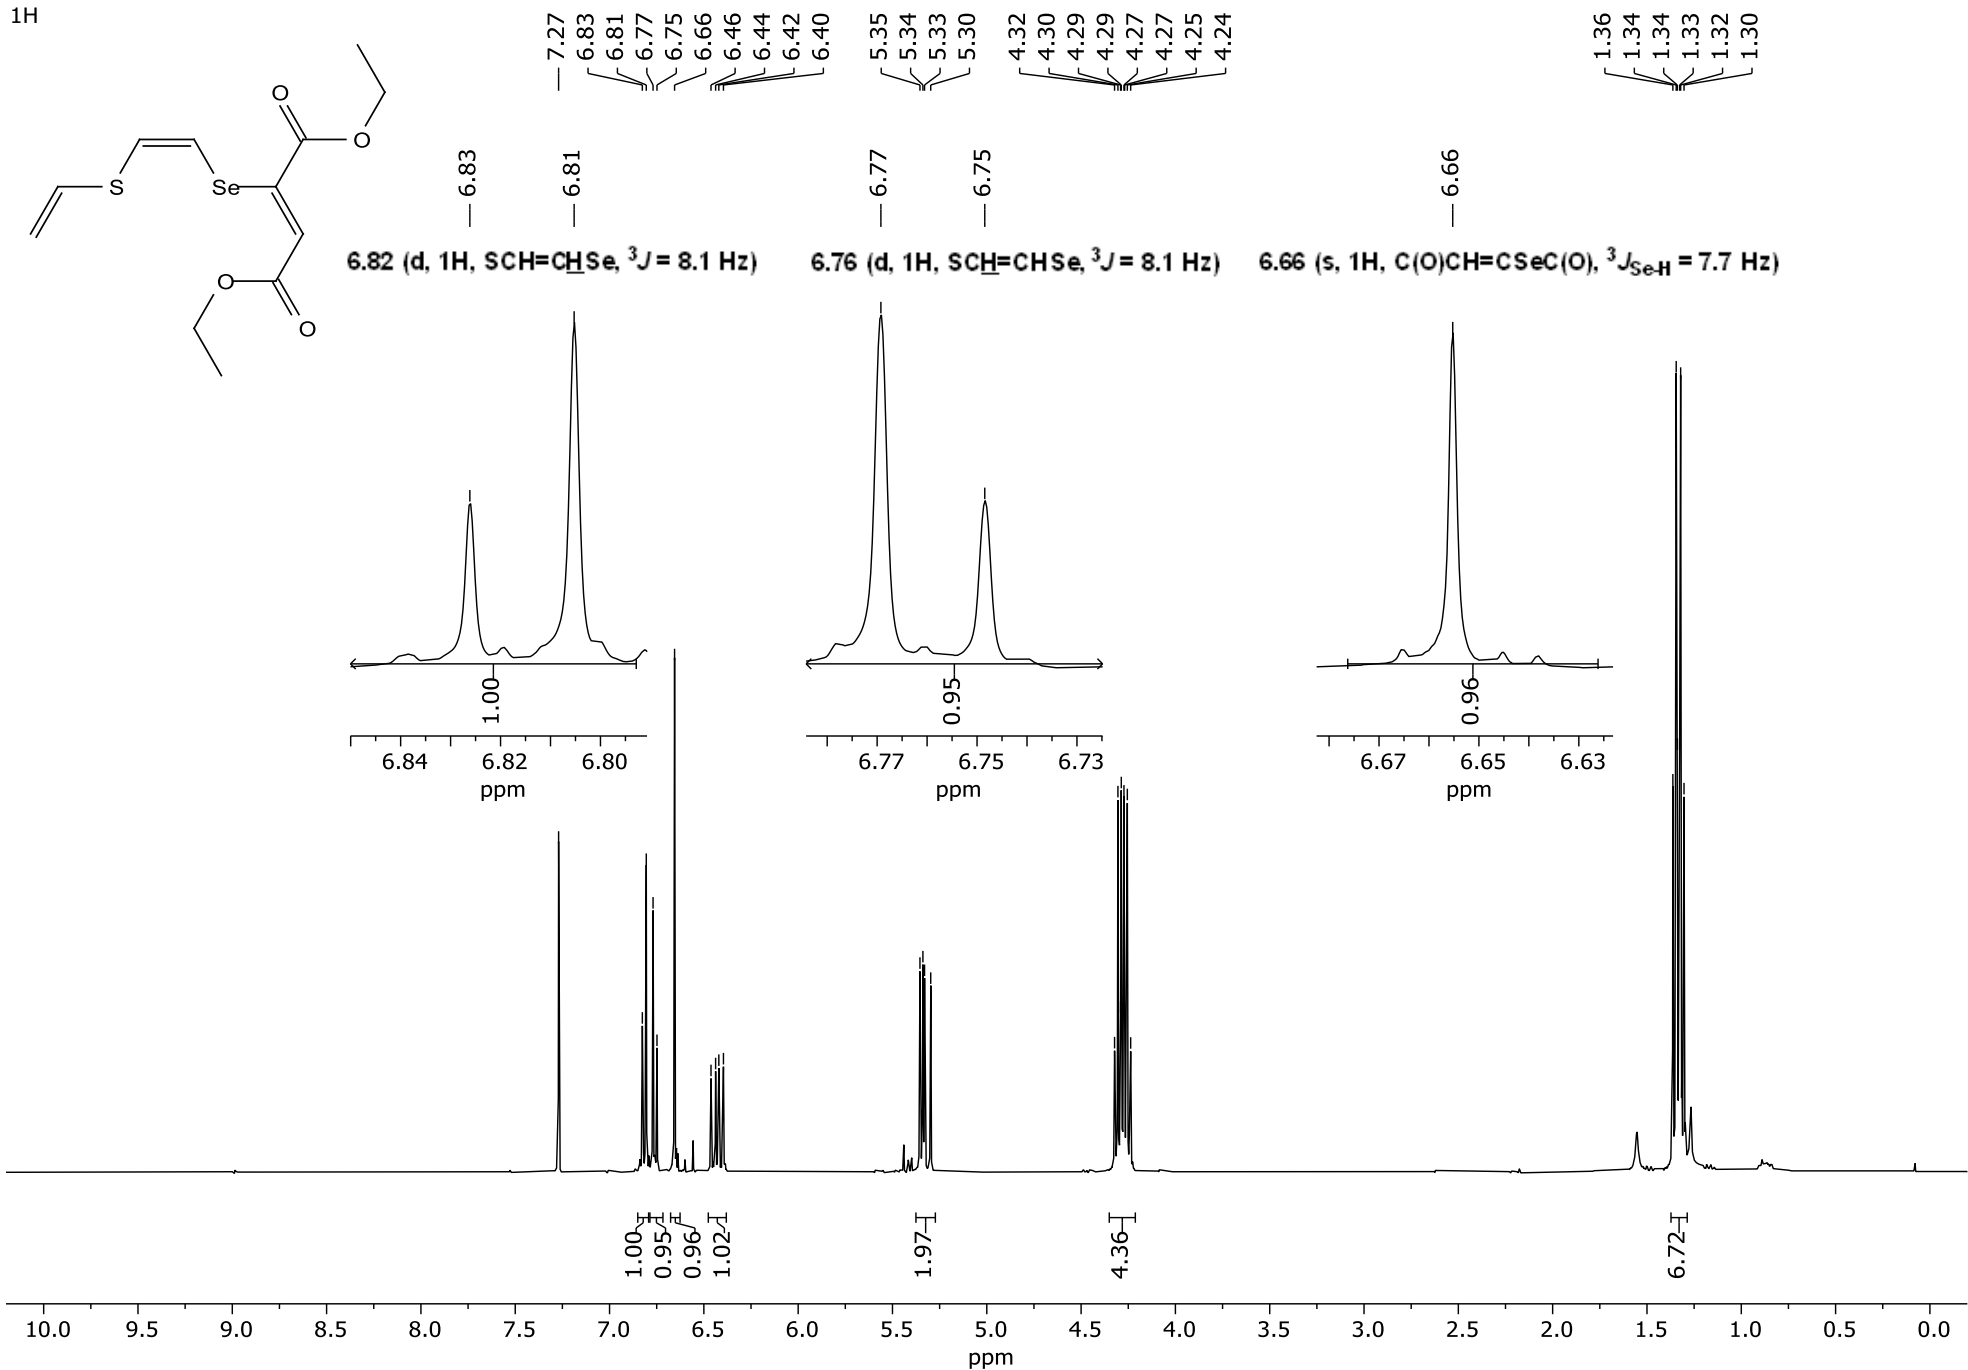

<sup>1</sup>H NMR spectrum of diethyl (Z)-2-[(Z)-2-(vinylsulfanyl)ethenyl]selanyl-2-butenedioate (5b)

13C

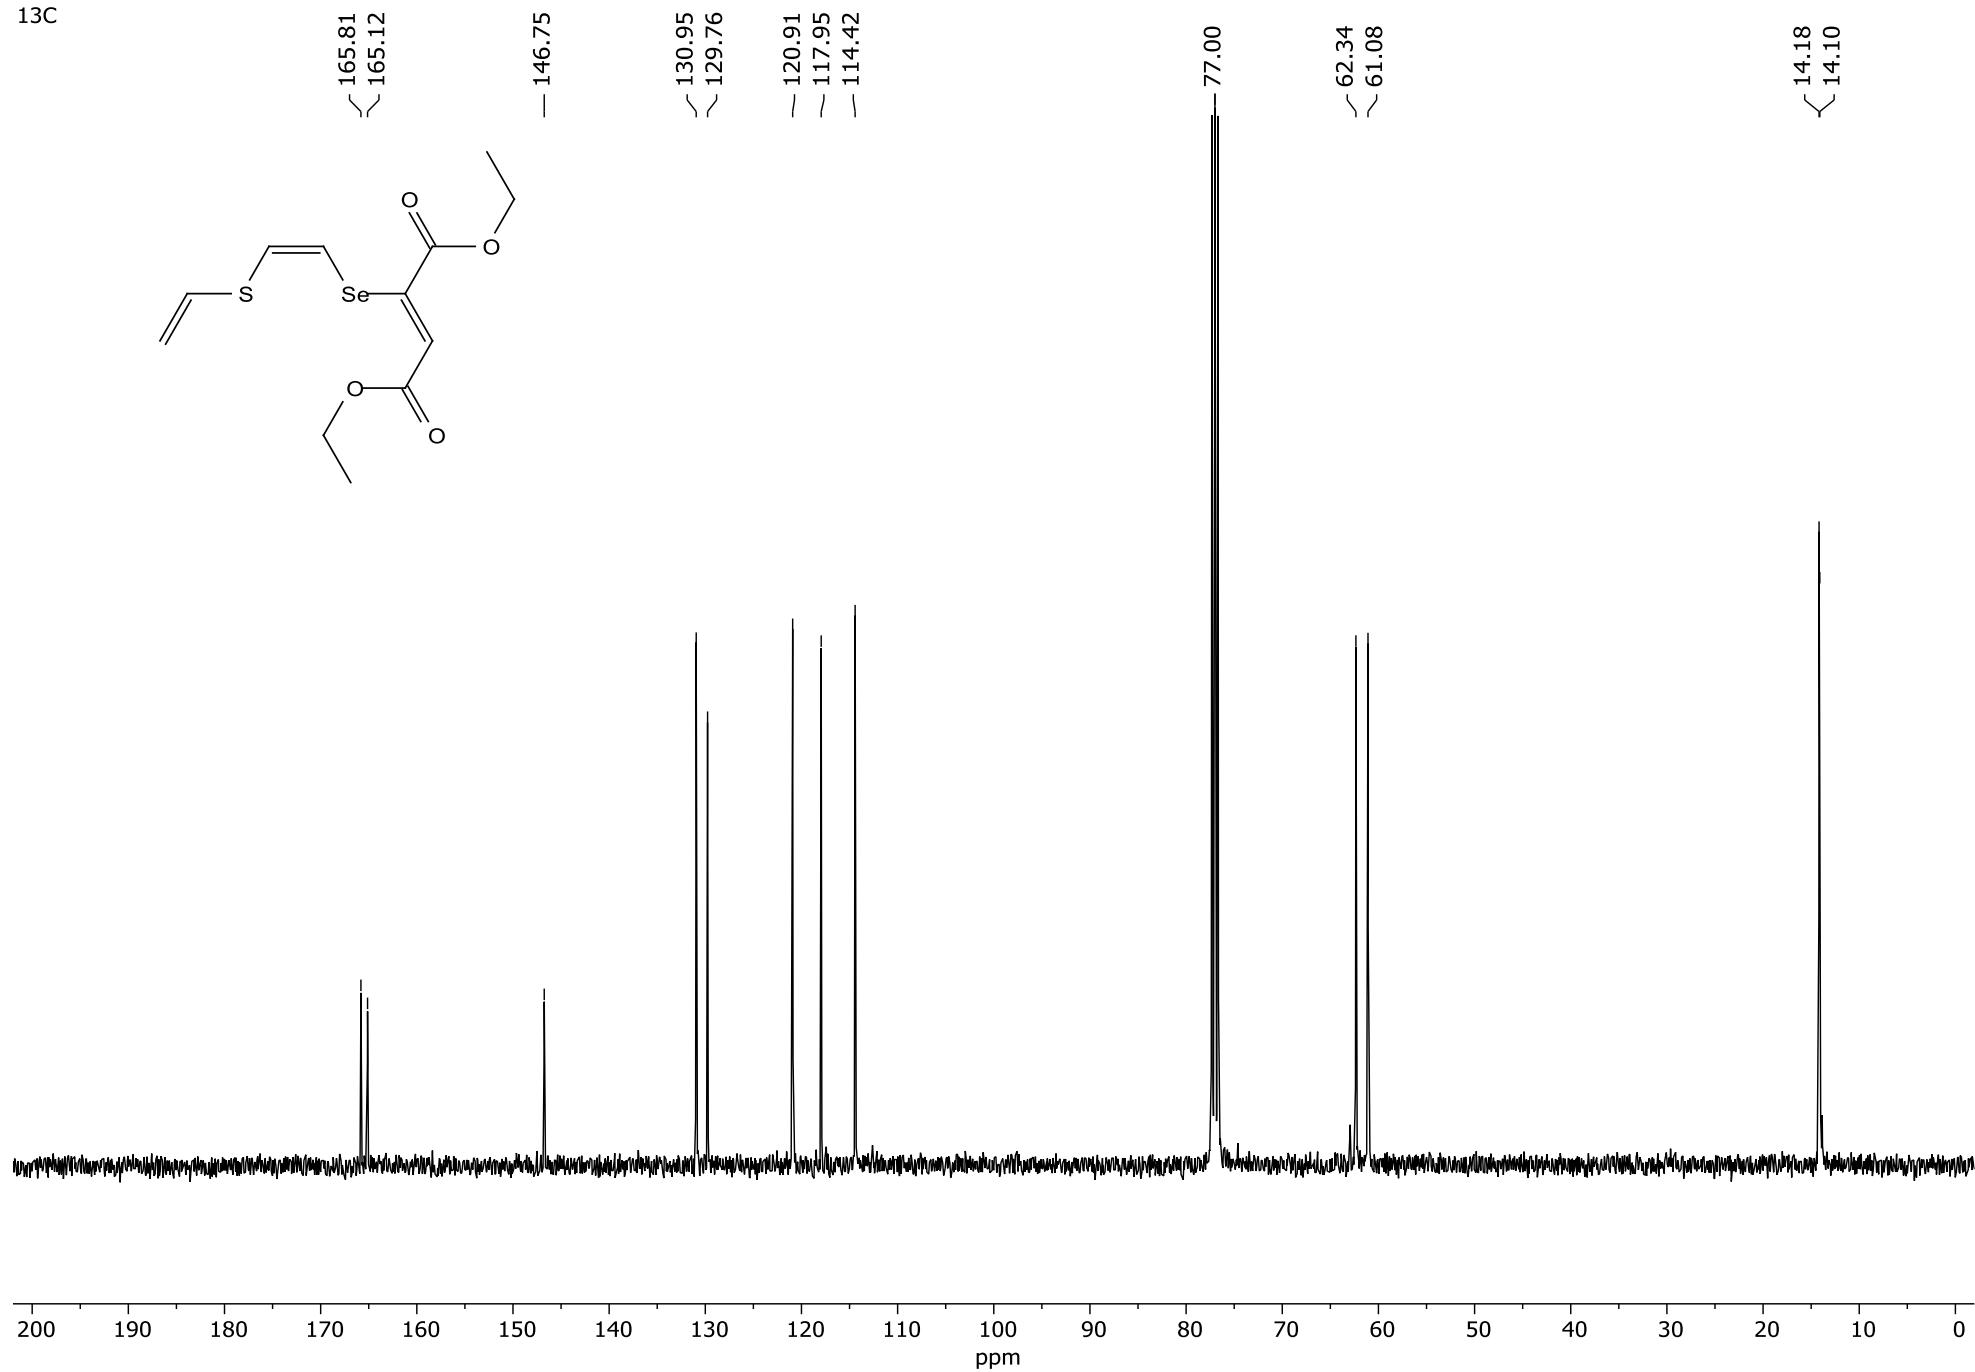

<sup>13</sup>C NMR spectrum of diethyl (Z)-2-[[Z]-2-(vinylsulfanyl)ethenyl]selanyl]-2-butenedioate (5b)



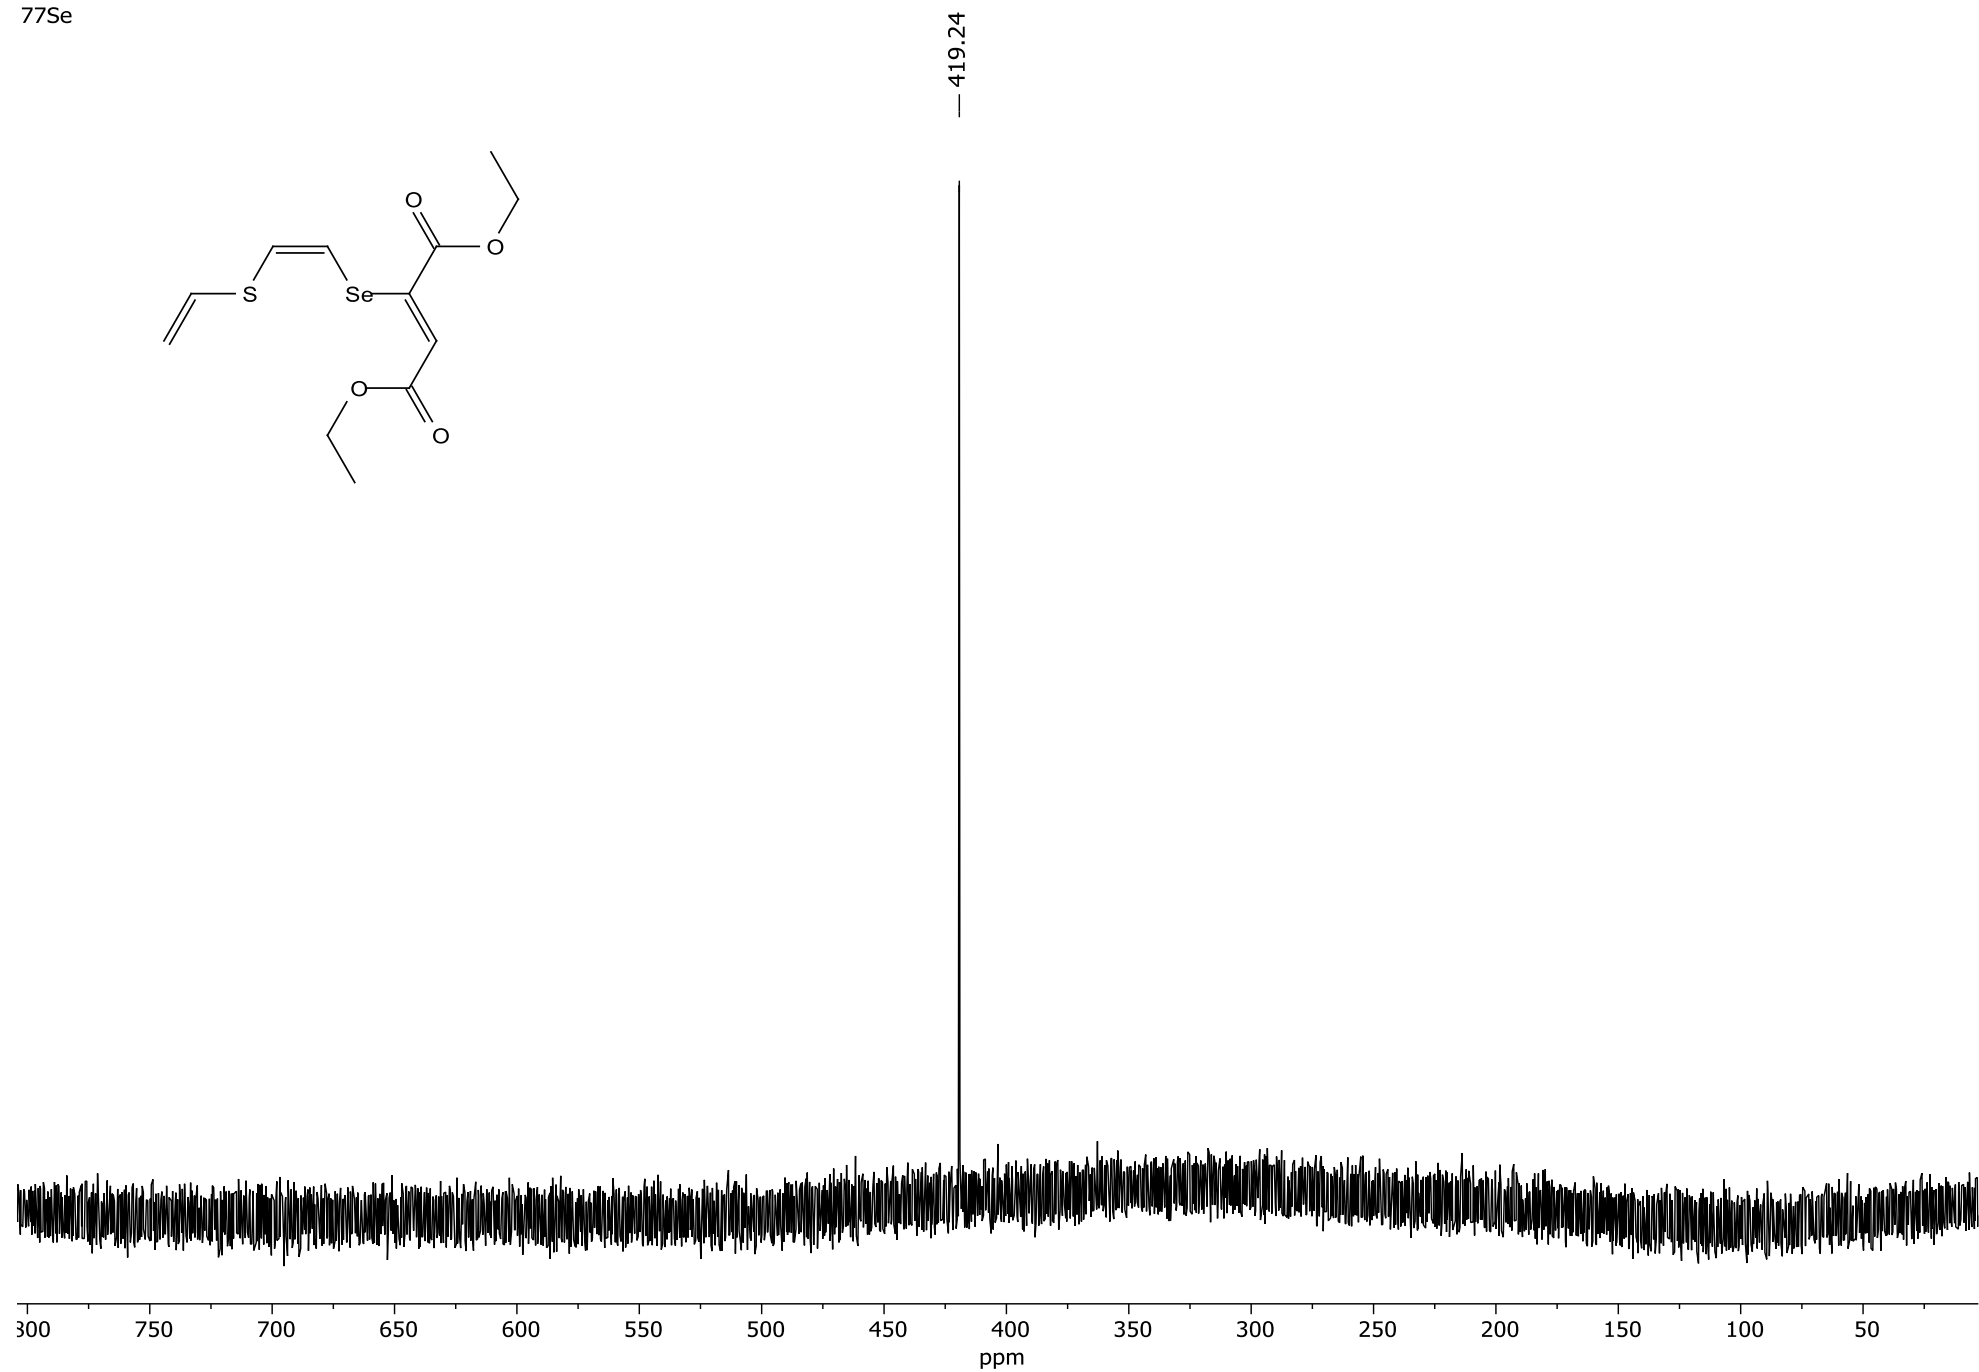

$^{77}\text{Se}$  NMR spectrum of diethyl (Z)-2-[[Z]-2-(vinylsulfanyl)ethenyl]selanyl-2-butenedioate (5b)

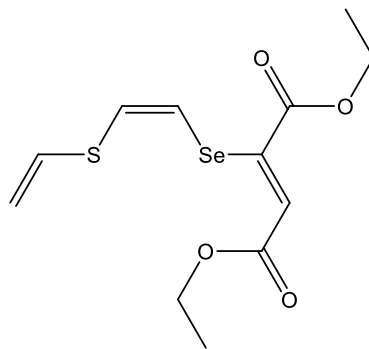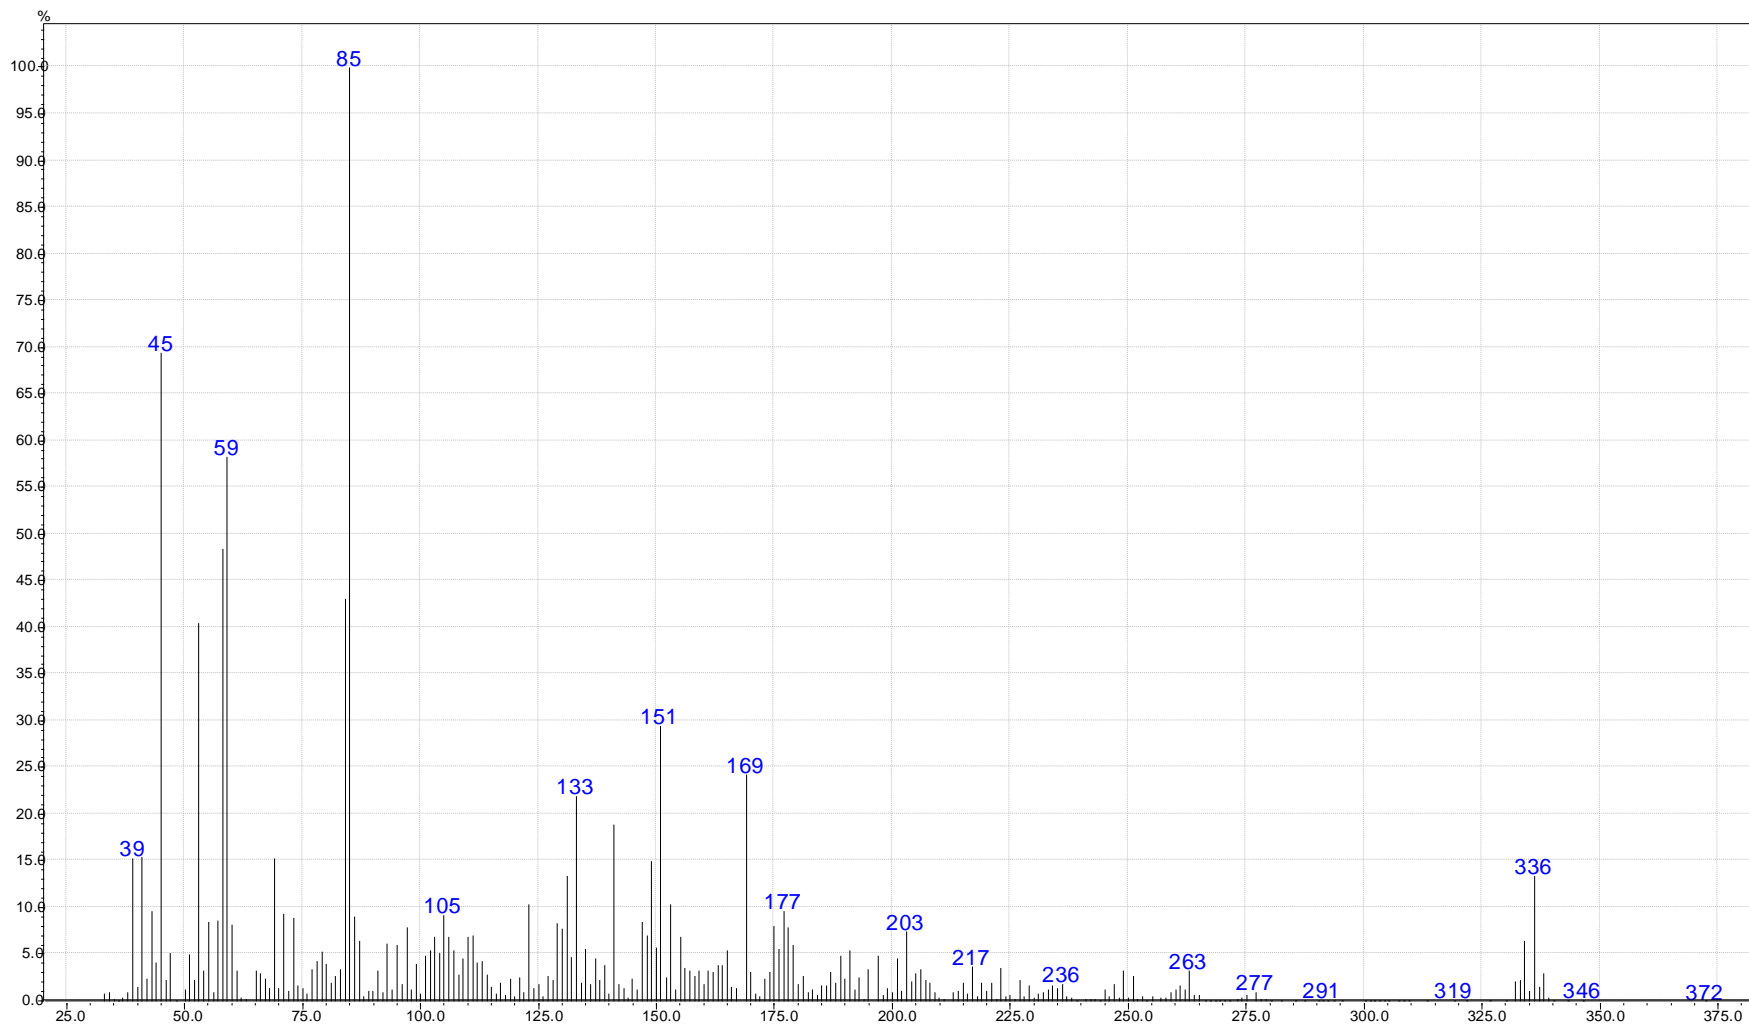

Mass-spectrum of diethyl (Z)-2-[(Z)-2-(vinylsulfanyl)ethenyl]selanyl-2-butenedioate (5b)

<sup>1</sup>H

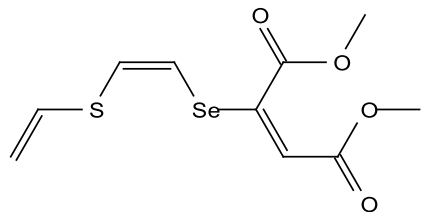

6.99  
6.97  
6.59  
6.57  
6.47  
6.44  
6.43  
6.40  
6.10  
5.40  
5.38  
5.34  
3.88  
3.74

6.99  
6.97

6.98 (d, 1H, SCH=CHSe, <sup>3</sup>J = 7.9 Hz)

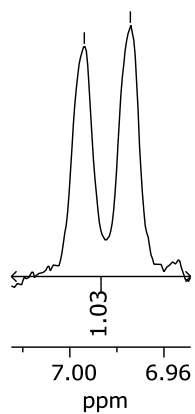

6.59  
6.57

6.58 (d, 1H, SCH=CHSe, <sup>3</sup>J = 7.9 Hz)

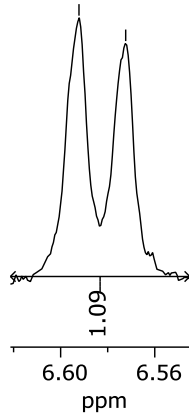

6.10 (s, 1H, C(O)CH=CSeC(O), <sup>3</sup>J<sub>Se-H</sub> = 5.4 Hz)

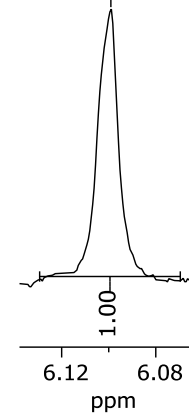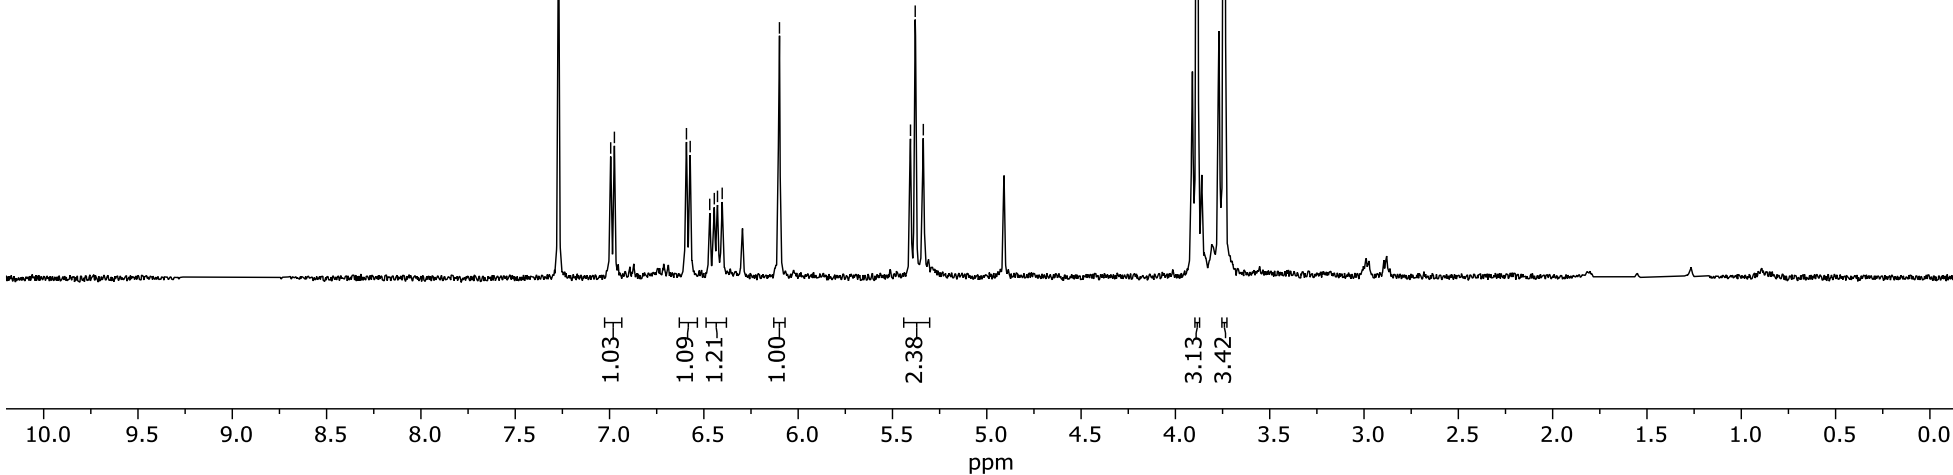

<sup>1</sup>H NMR spectrum of dimethyl (E)-2-[(Z)-2-(vinylsulfanyl)ethenyl]selanyl-2-butenedioate (5c) (E,Z)

13C

— 166.36  
— 163.71

— 142.85

— 133.95

— 129.14

— 120.07

— 115.41

— 114.16

77.00

— 53.00  
— 52.05

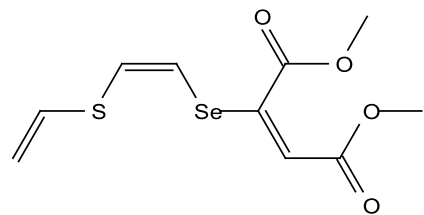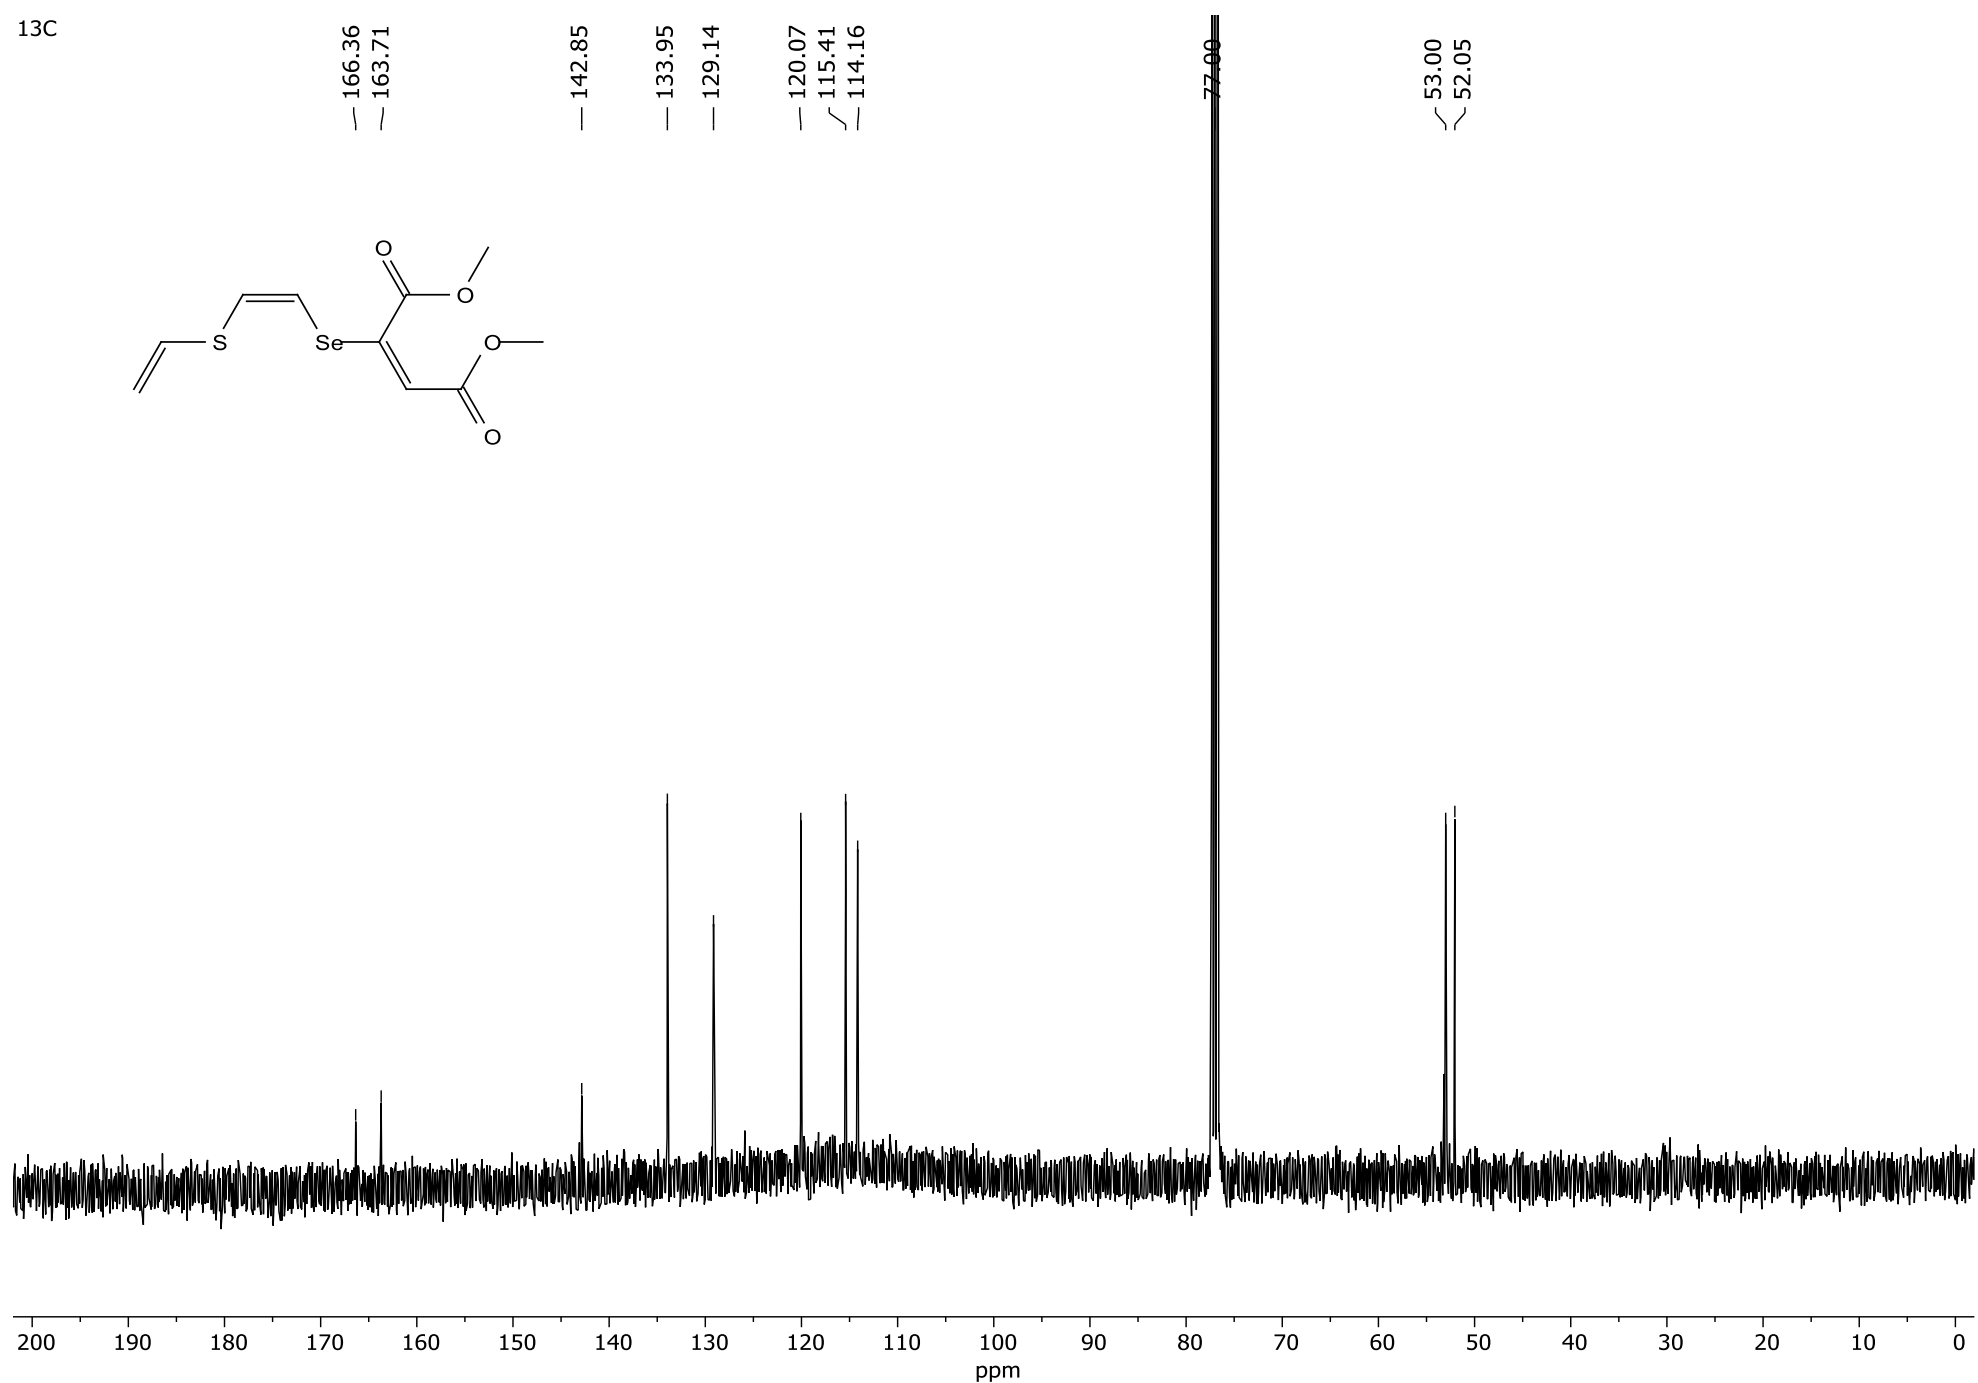

<sup>13</sup>C NMR spectrum of dimethyl (E)-2-[(Z)-2-(vinylsulfanyl)ethenyl]selanyl-2-butenedioate (5c) (E,Z)

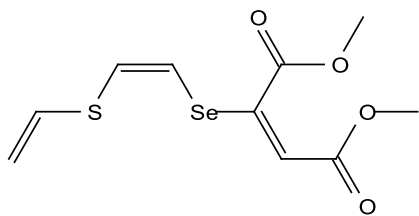

— 398.24

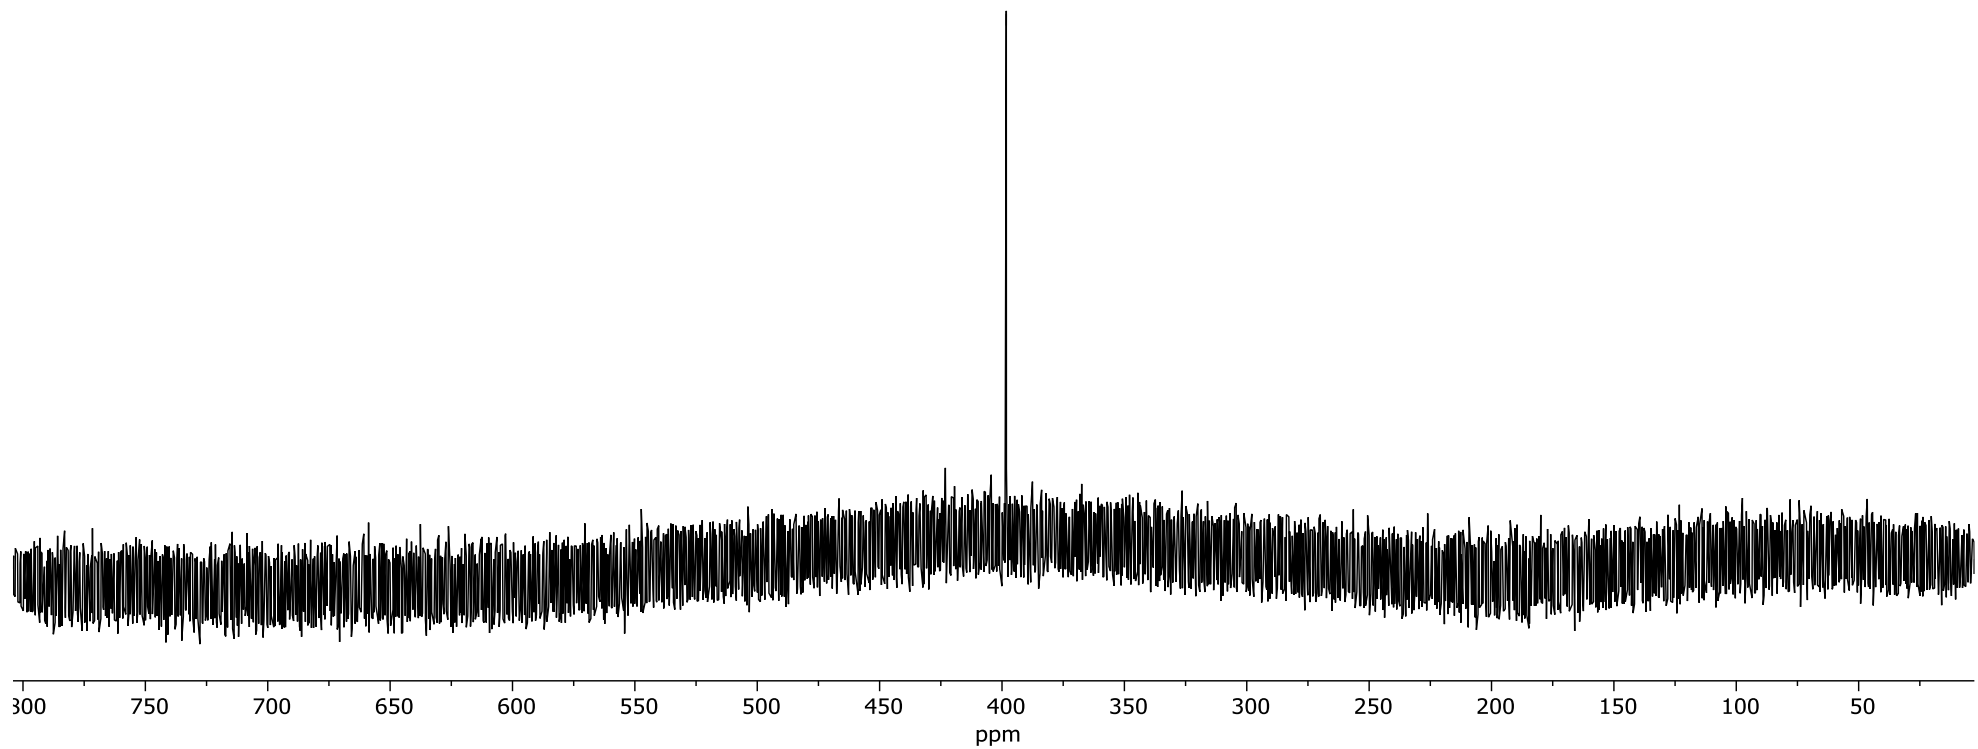

**<sup>77</sup>Se NMR spectrum of dimethyl (E)-2-[(Z)-2-(vinylsulfanyl)ethenyl]selanyl-2-butenedioate (5c) (E,Z)**

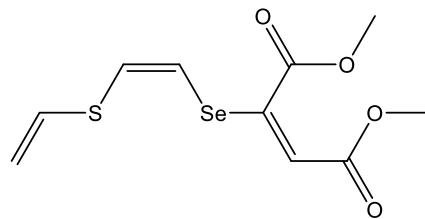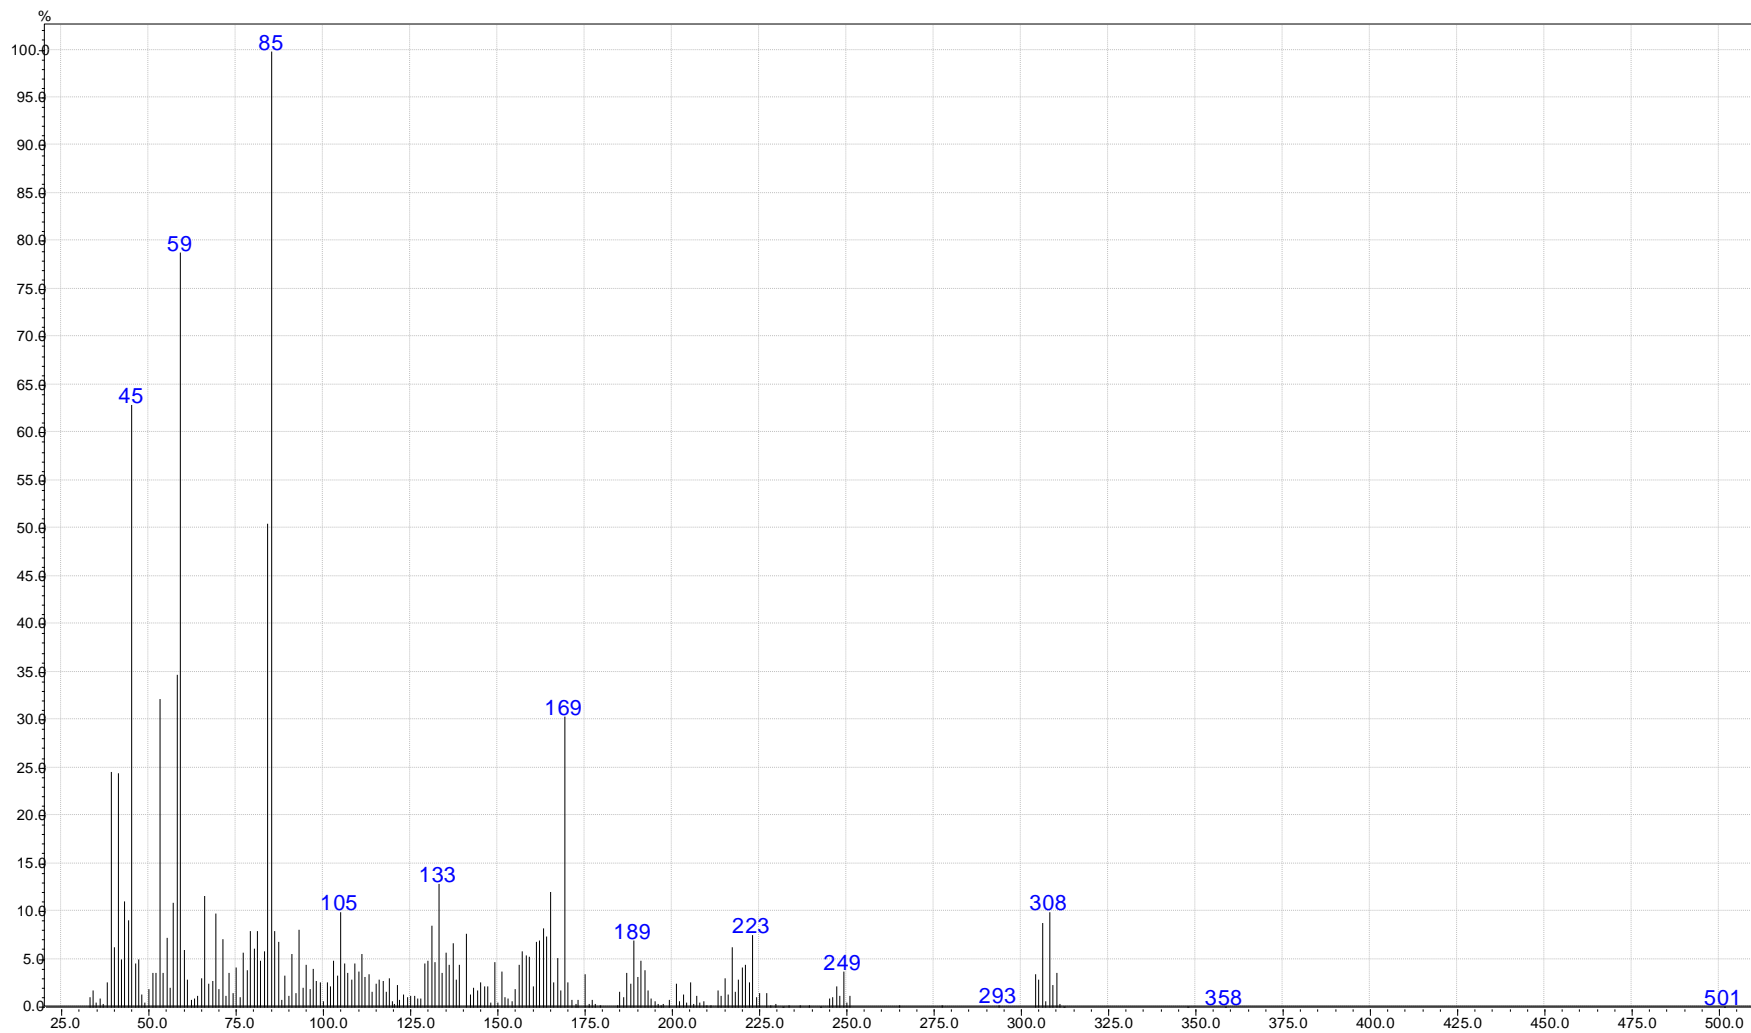

Mass-spectrum of dimethyl (E)-2-[(Z)-2-(vinylsulfanyl)ethenyl]selanyl-2-butenedioate (5c) (E,Z)

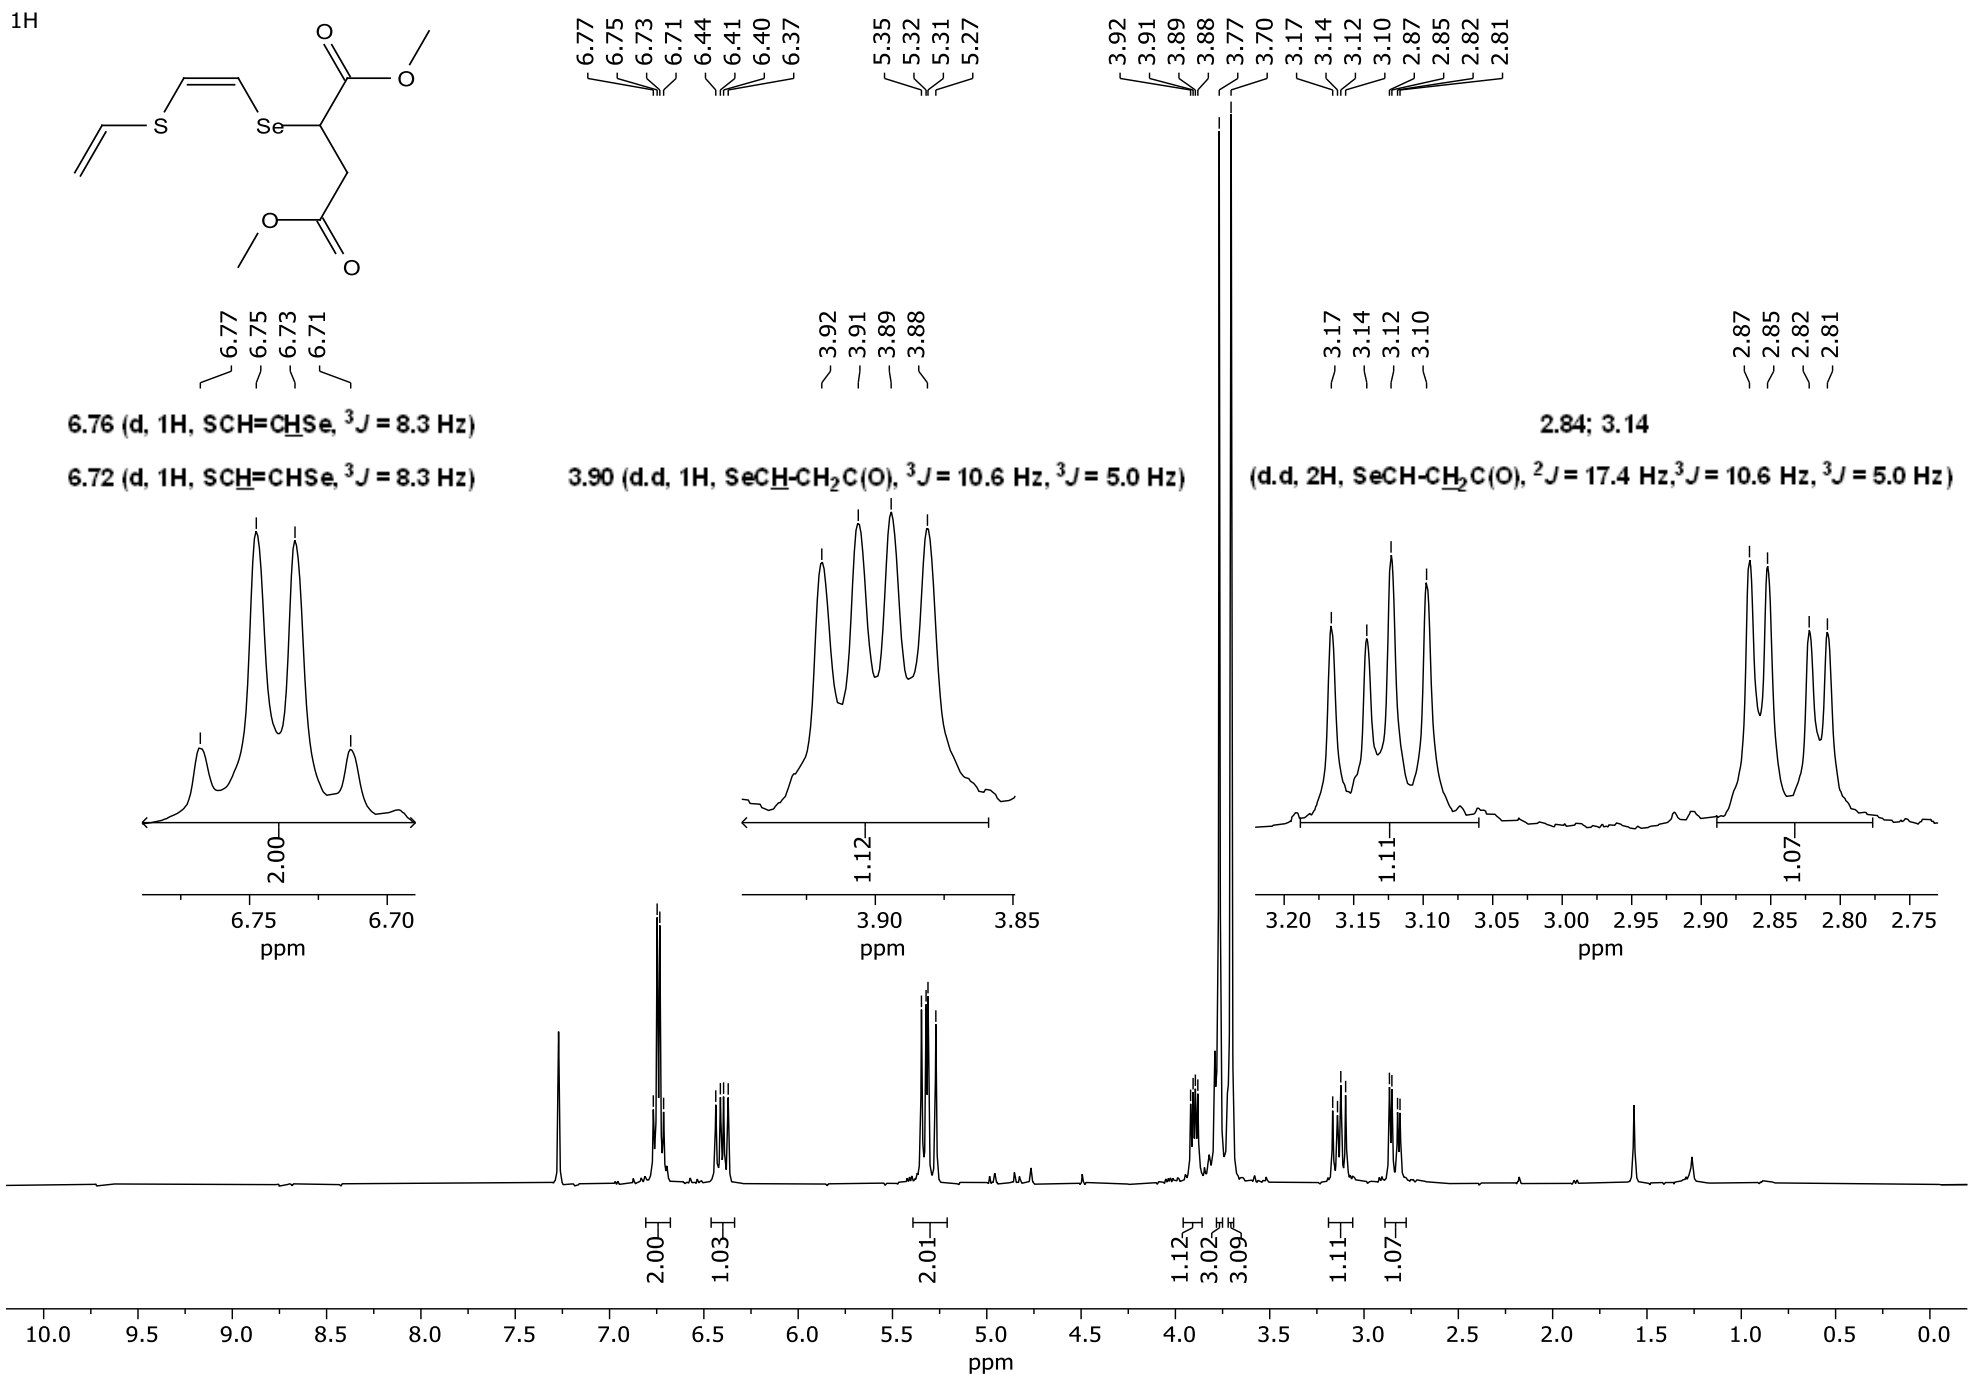

<sup>1</sup>H NMR spectrum of dimethyl 2-[(Z)-2-(vinylsulfonyl)ethenyl]selanyl succinate (6a)

13C

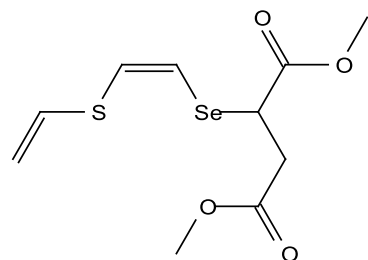

172.12  
171.13

129.55  
127.25

118.60  
114.08

77.00

52.59  
52.00

36.60  
34.51

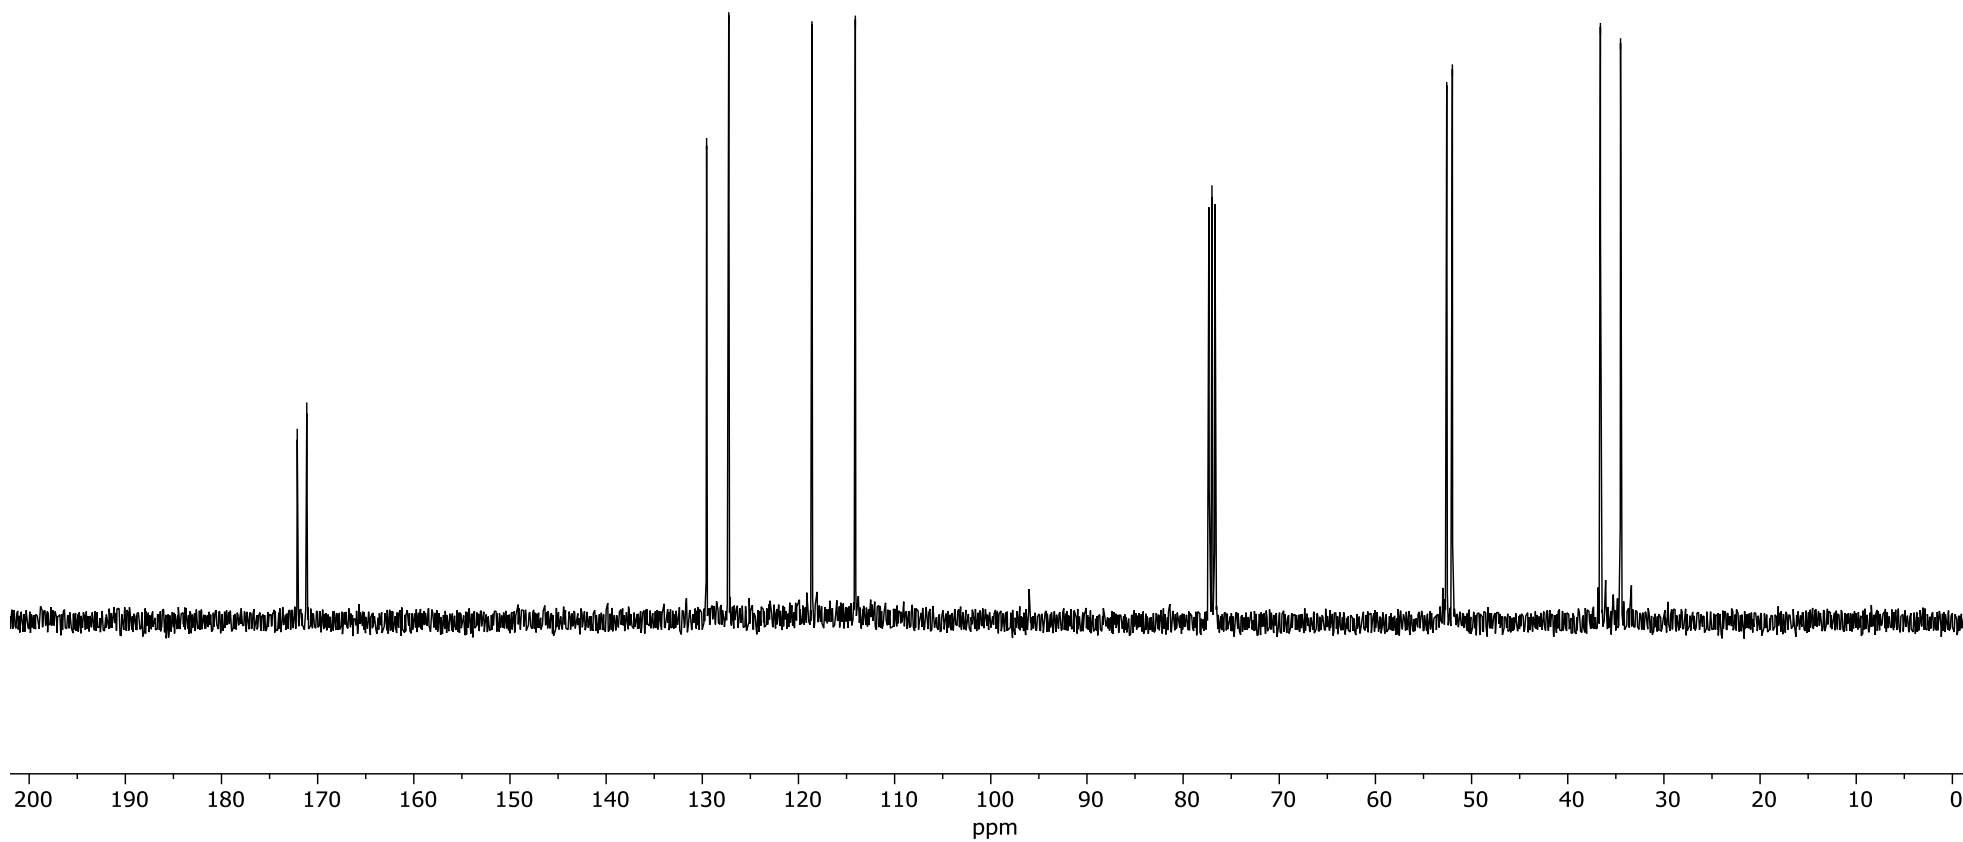

<sup>13</sup>C NMR spectrum of dimethyl 2-[(Z)-2-(vinylsulfanyl)ethenyl]selanylsuccinate (6a)



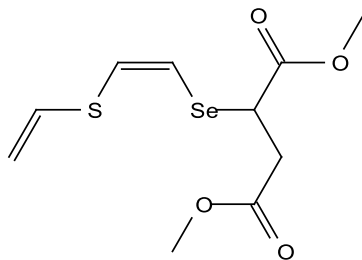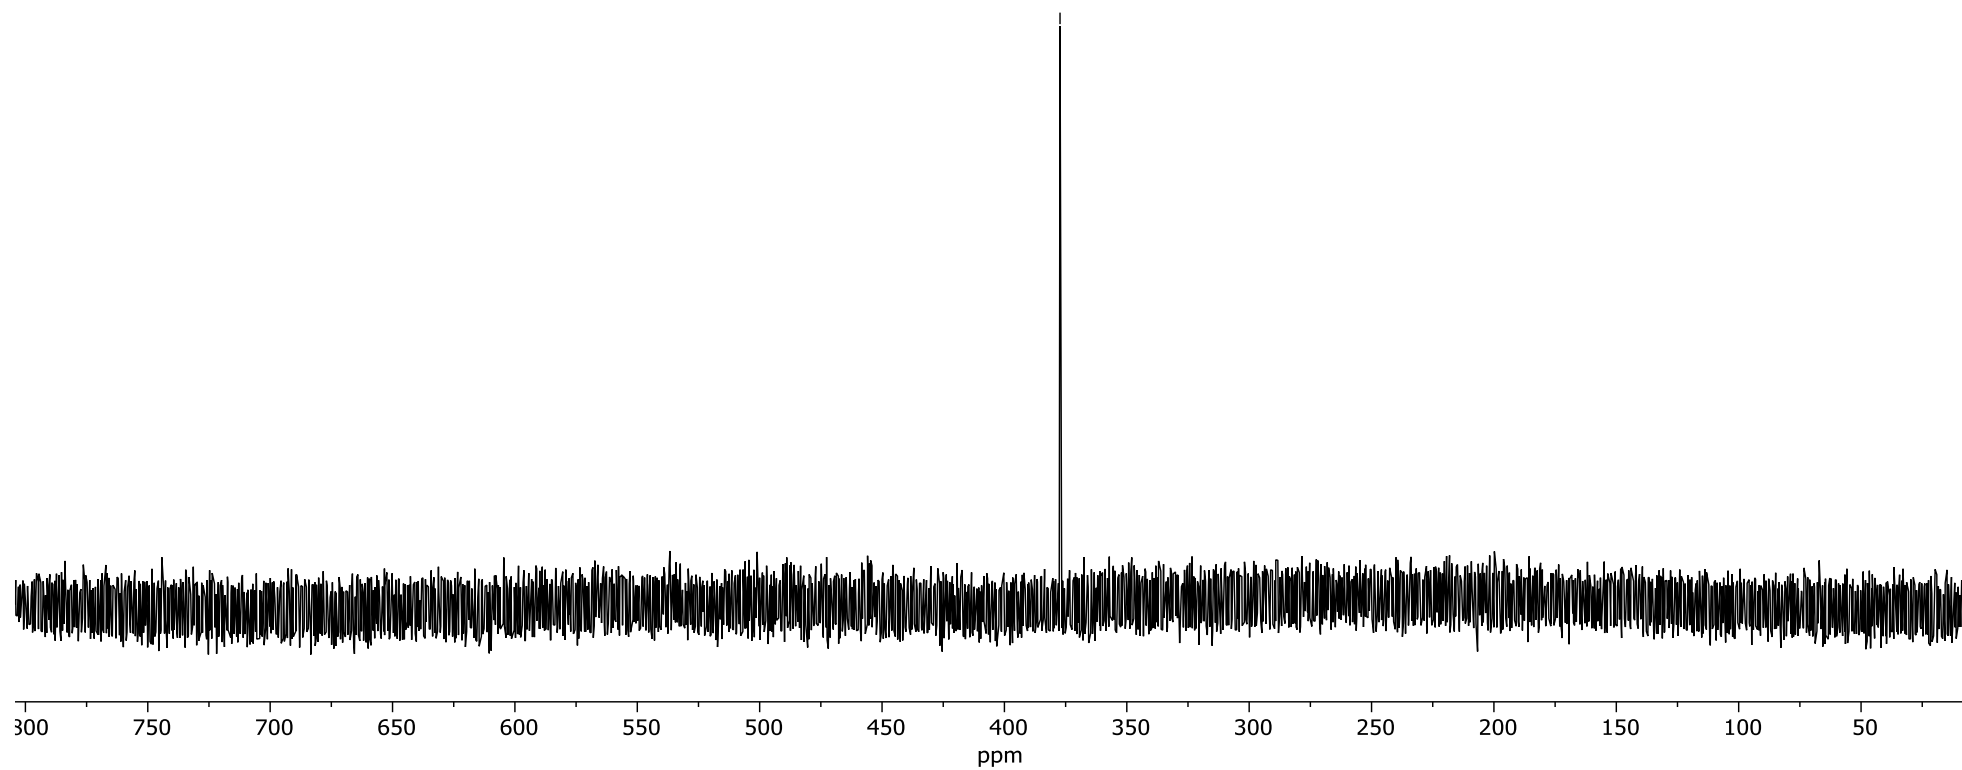

**<sup>77</sup>Se NMR spectrum of dimethyl 2-([(Z)-2-(vinylsulfanyl)ethenyl]selanyl)succinate (6a)**

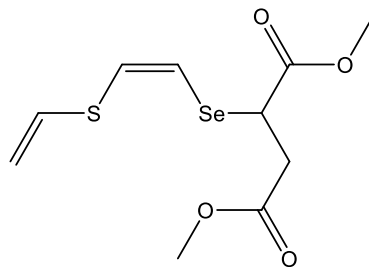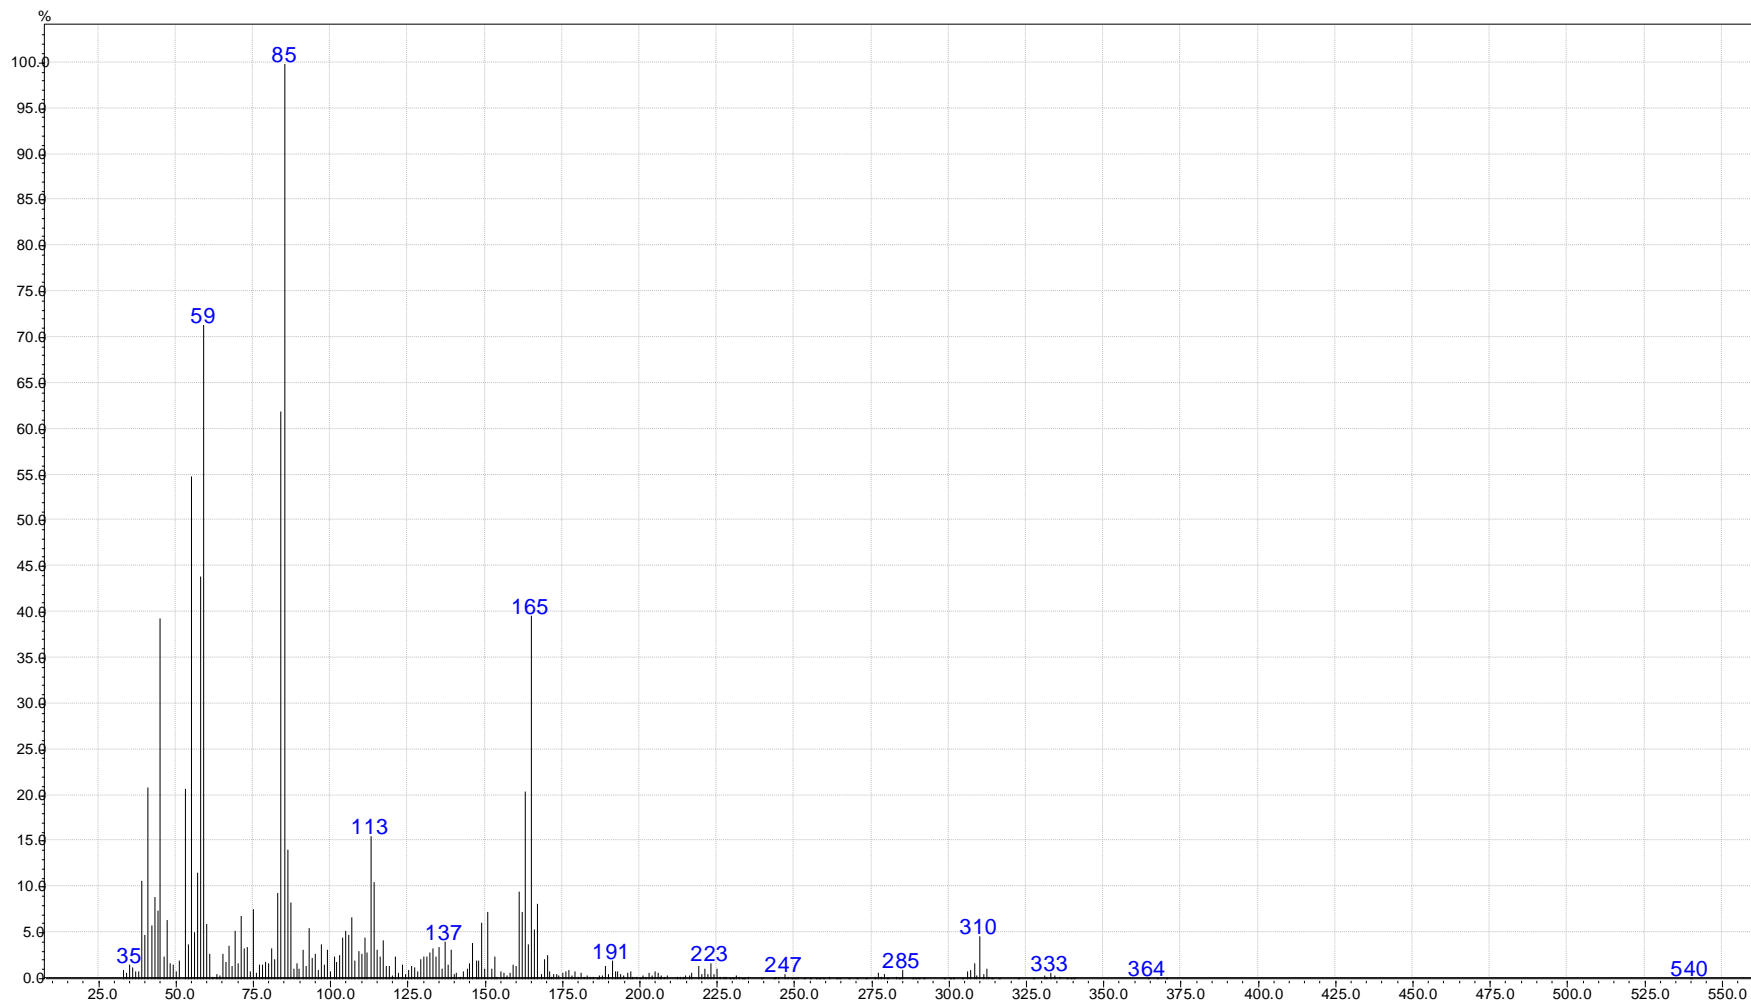

Mass-spectrum of dimethyl 2-[(Z)-2-(vinylsulfanyl)ethenyl]selanyl succinate (6a)

<sup>1</sup>H

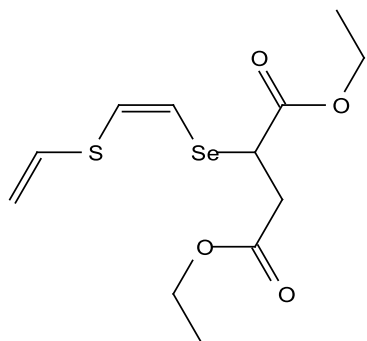

7.27  
6.79  
6.77  
6.71  
6.69  
6.43  
6.40  
6.39  
6.36  
5.33  
5.31  
5.30  
5.25  
4.24  
4.23  
4.22  
4.22  
4.20  
4.20  
4.19  
4.18  
4.18  
4.16  
4.14  
4.12  
3.89  
3.87  
3.86  
3.85  
3.13  
3.11  
3.11  
3.09  
3.07  
2.83  
2.82  
2.79  
2.78  
1.29  
1.28  
1.27  
1.26  
1.25  
1.23

6.79  
6.77  
6.71  
6.69

6.78 (d, 1H, SCH=CHSe, <sup>3</sup>J = 8.2 Hz)

6.70 (d, 1H, SCH=CHSe, <sup>3</sup>J = 8.2 Hz)

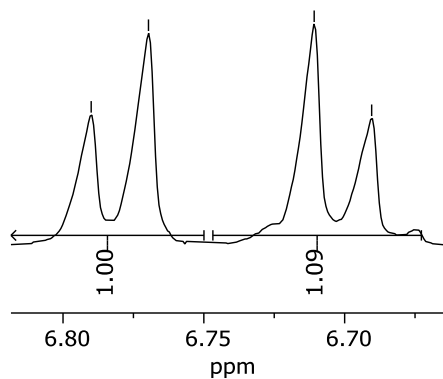

3.87 (d.d, 1H, SeCH-CH<sub>2</sub>C(O), <sup>3</sup>J = 10.2 Hz, <sup>3</sup>J = 5.5 Hz)

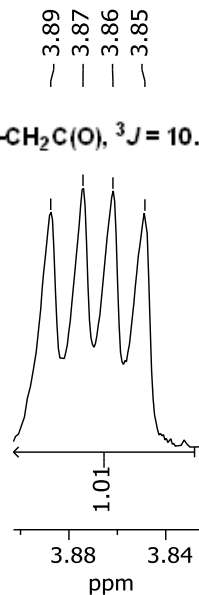

2.81; 3.10 (d.d, 2H, SeCH-CH<sub>2</sub>C(O), <sup>2</sup>J = 17.3 Hz, <sup>3</sup>J = 10.2 Hz, <sup>3</sup>J = 5.5 Hz)

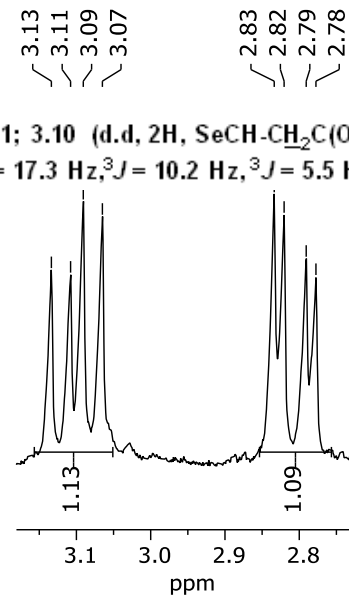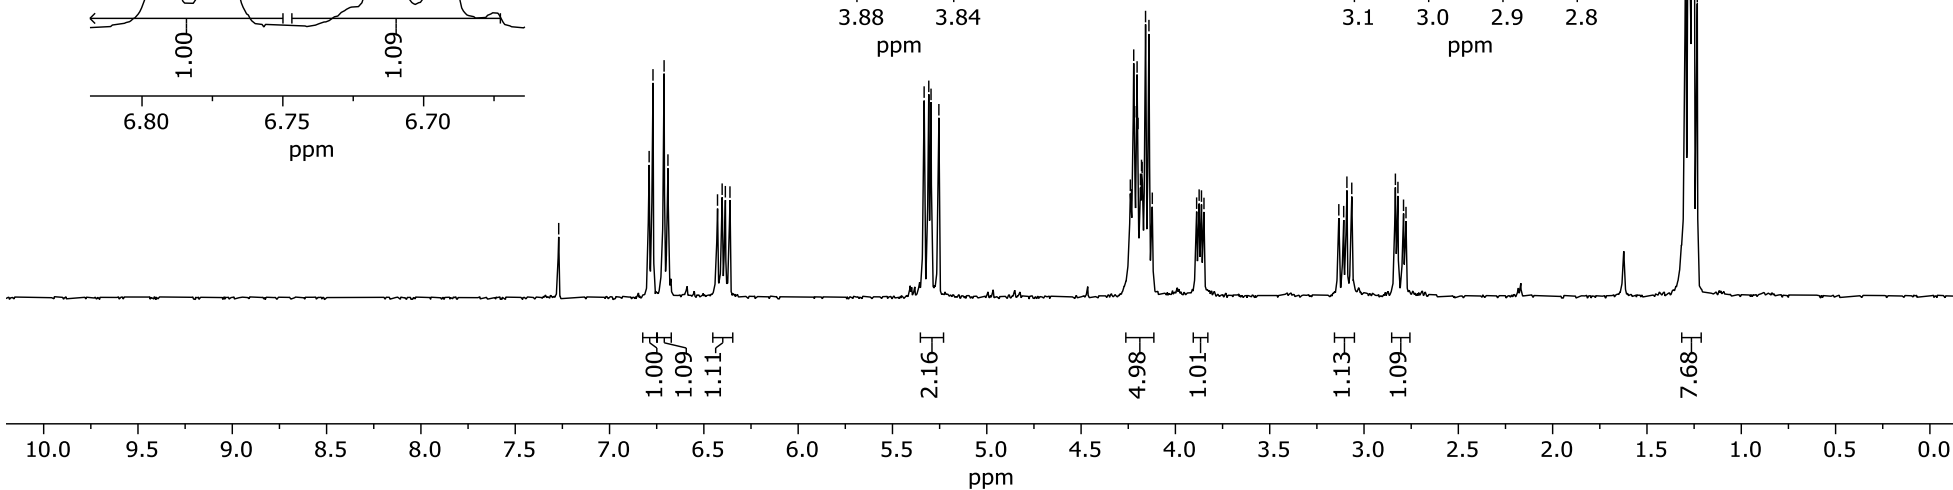

<sup>1</sup>H NMR spectrum of diethyl 2-[(Z)-2-(vinylsulfanyl)ethenyl]selanylsuccinate (6b)

13C

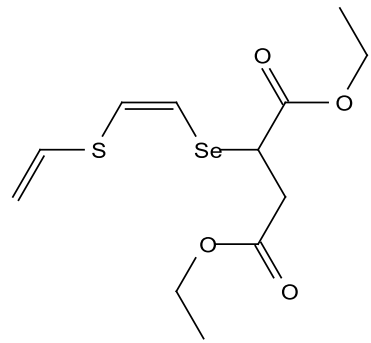

171.36  
170.36

129.55  
126.55

118.94  
113.73

77.00

61.19  
60.70

36.65  
34.74

13.91  
13.83

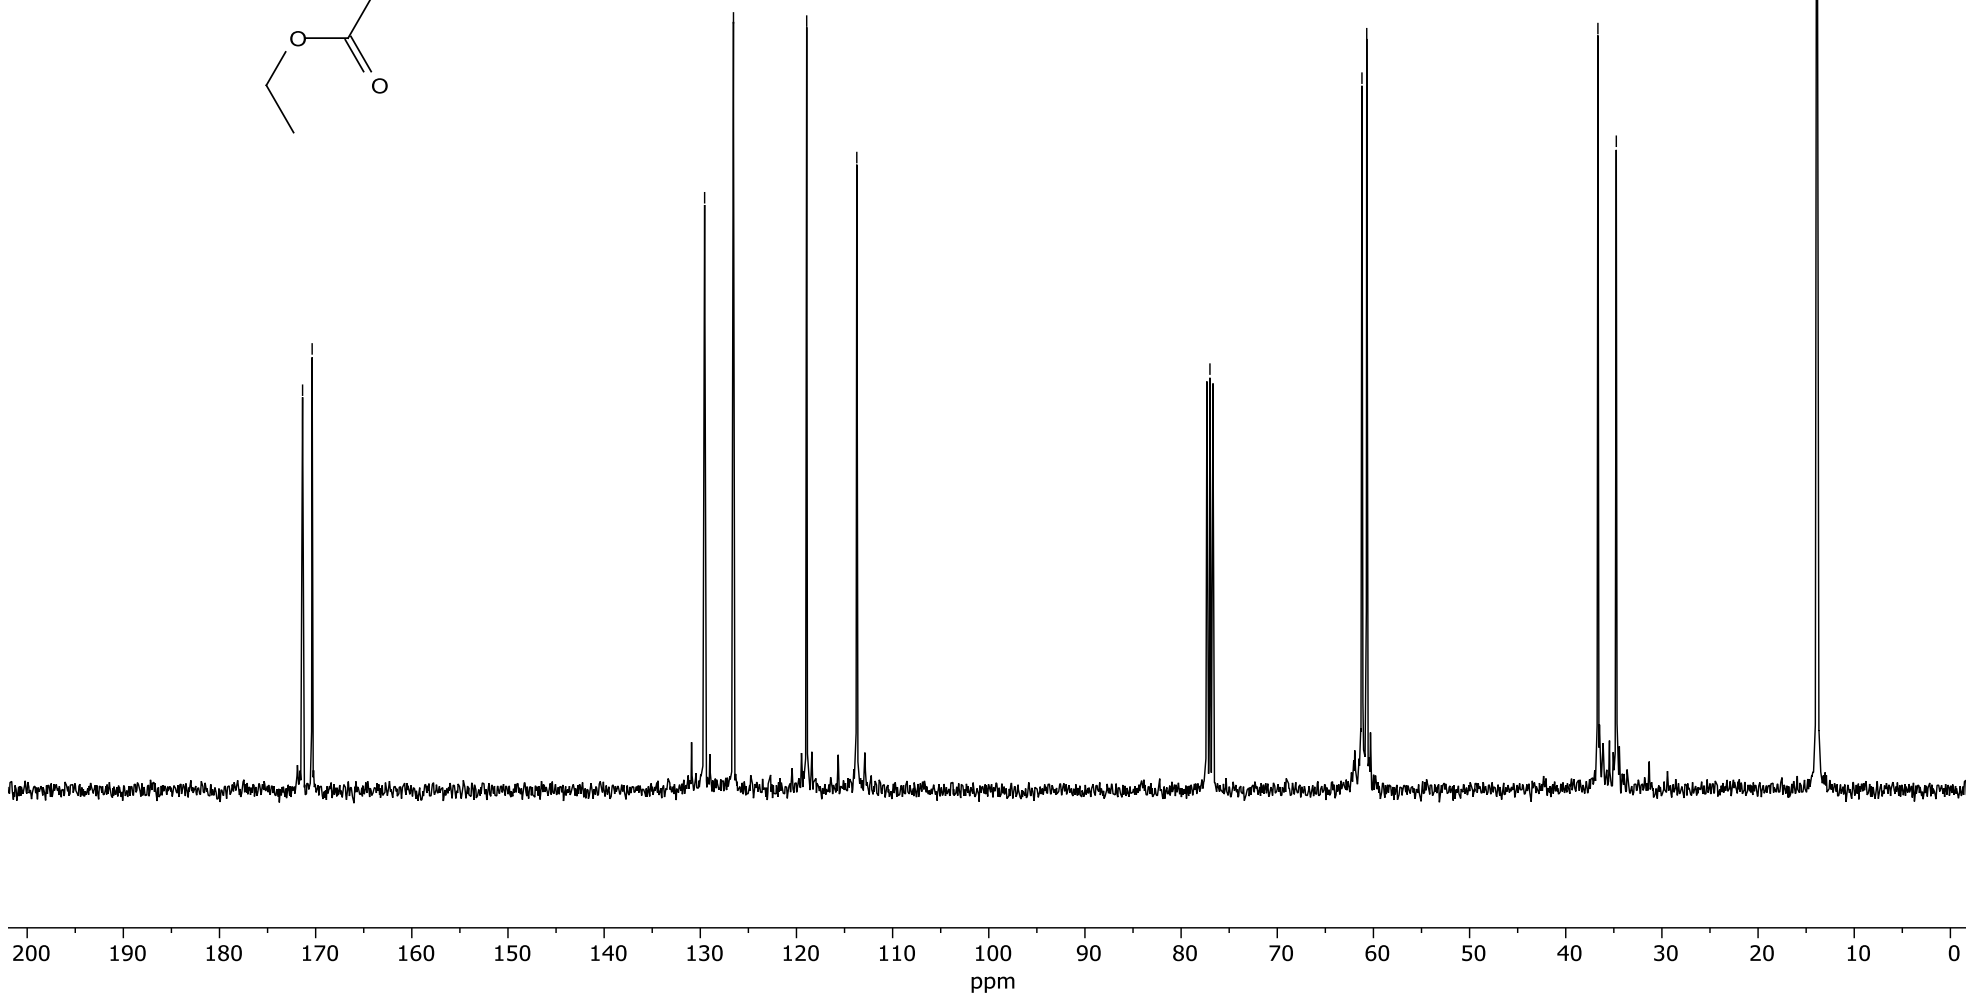

<sup>13</sup>C NMR spectrum of diethyl 2-[[*Z*]-2-(vinylsulfanyl)ethenyl]selanyl]succinate (6b)

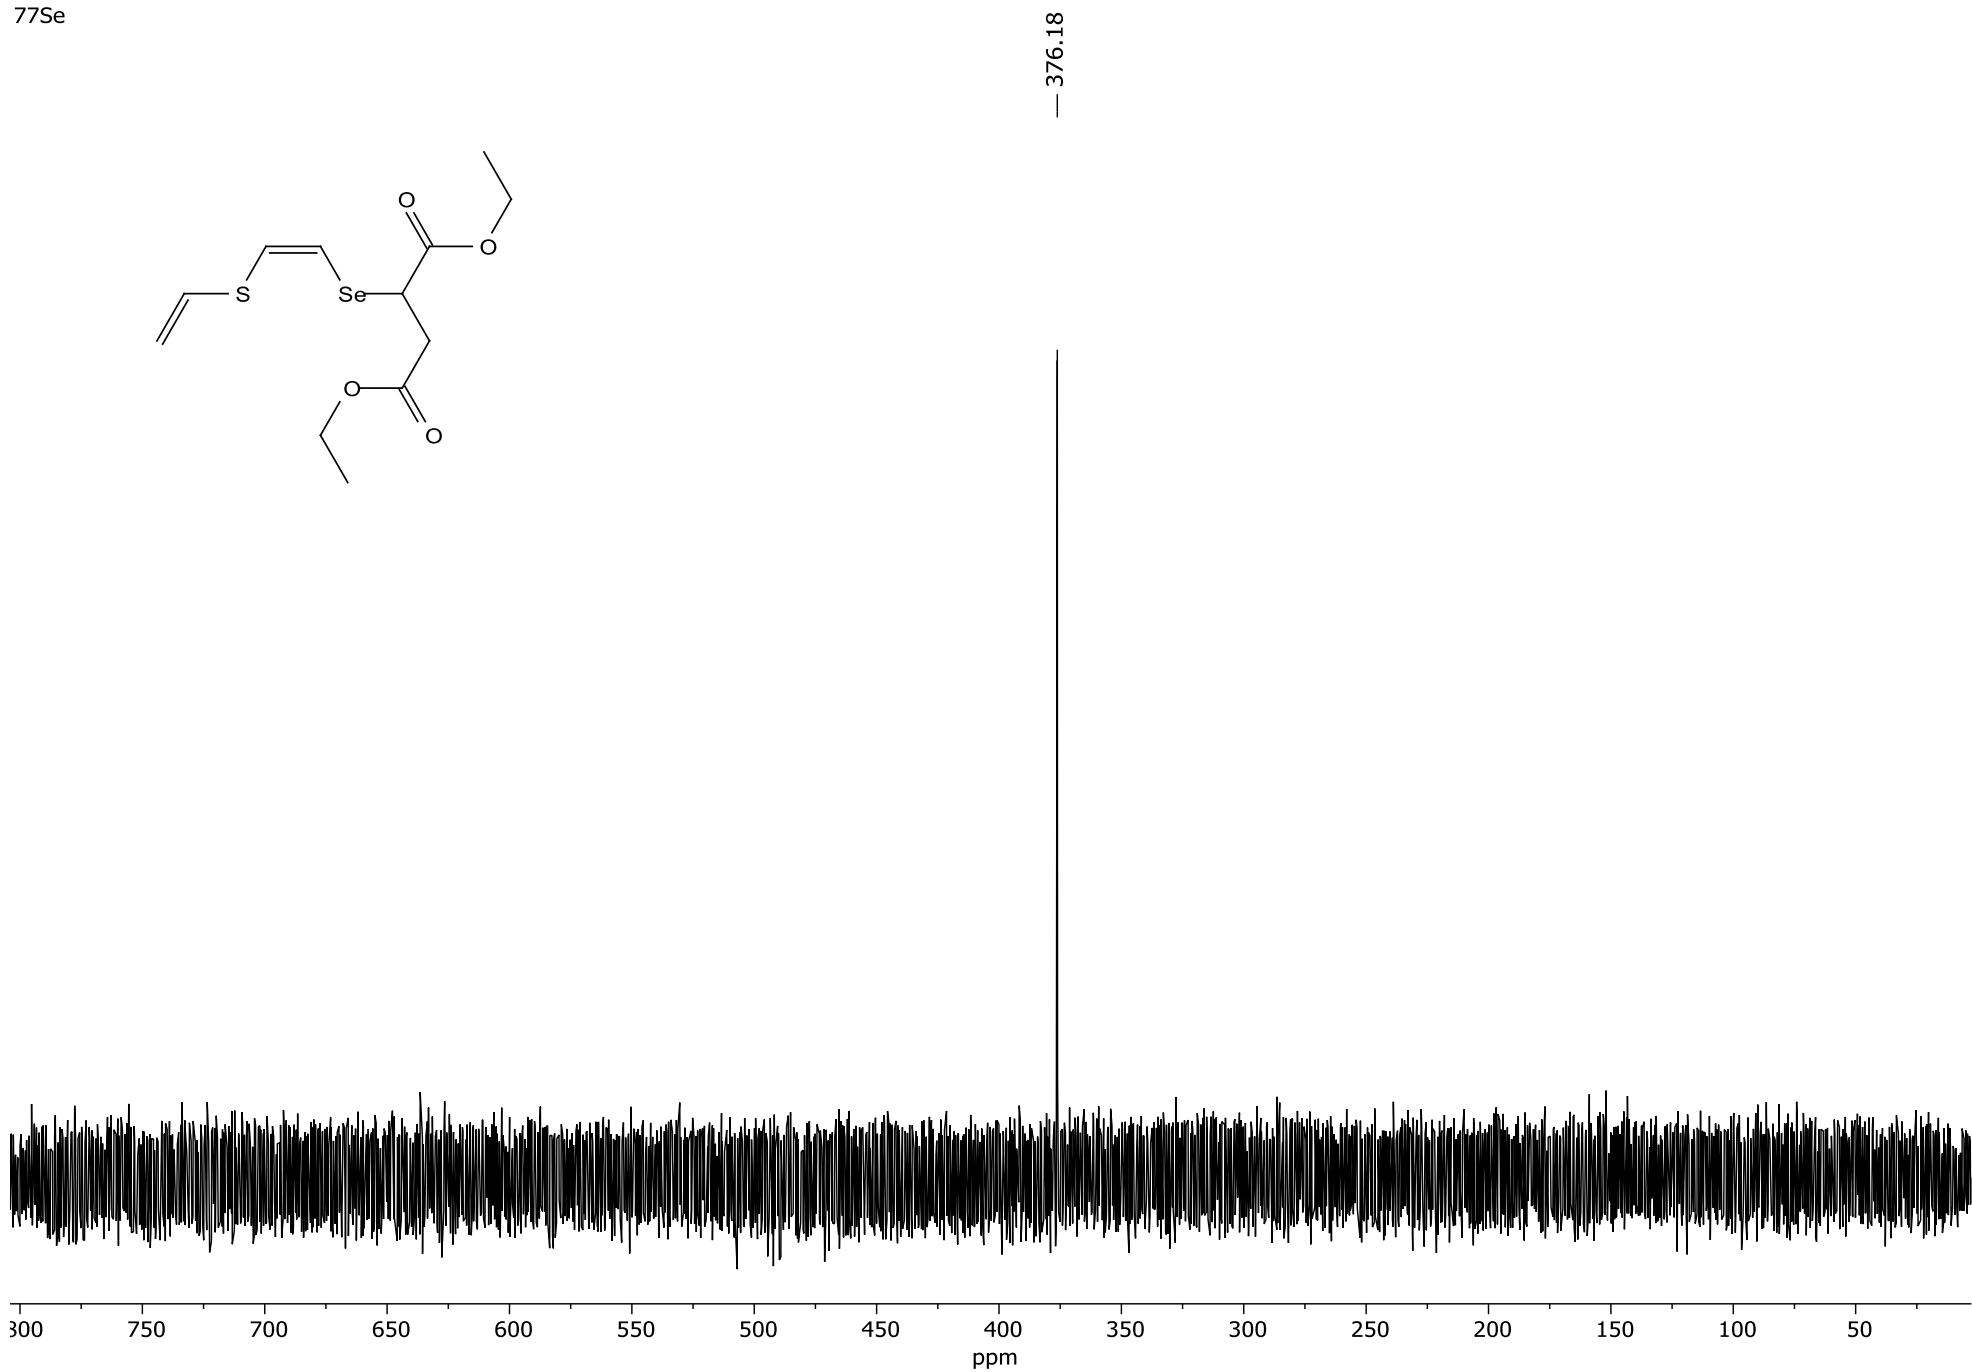

$^{77}\text{Se}$  NMR spectrum of diethyl 2-[(Z)-2-(vinylsulfanyl)ethenyl]selanyl succinate (6b)

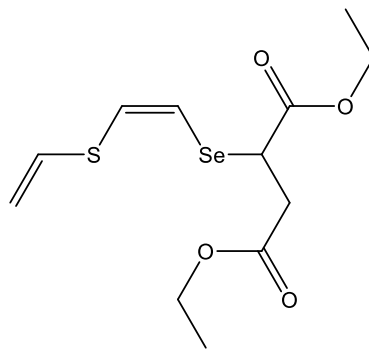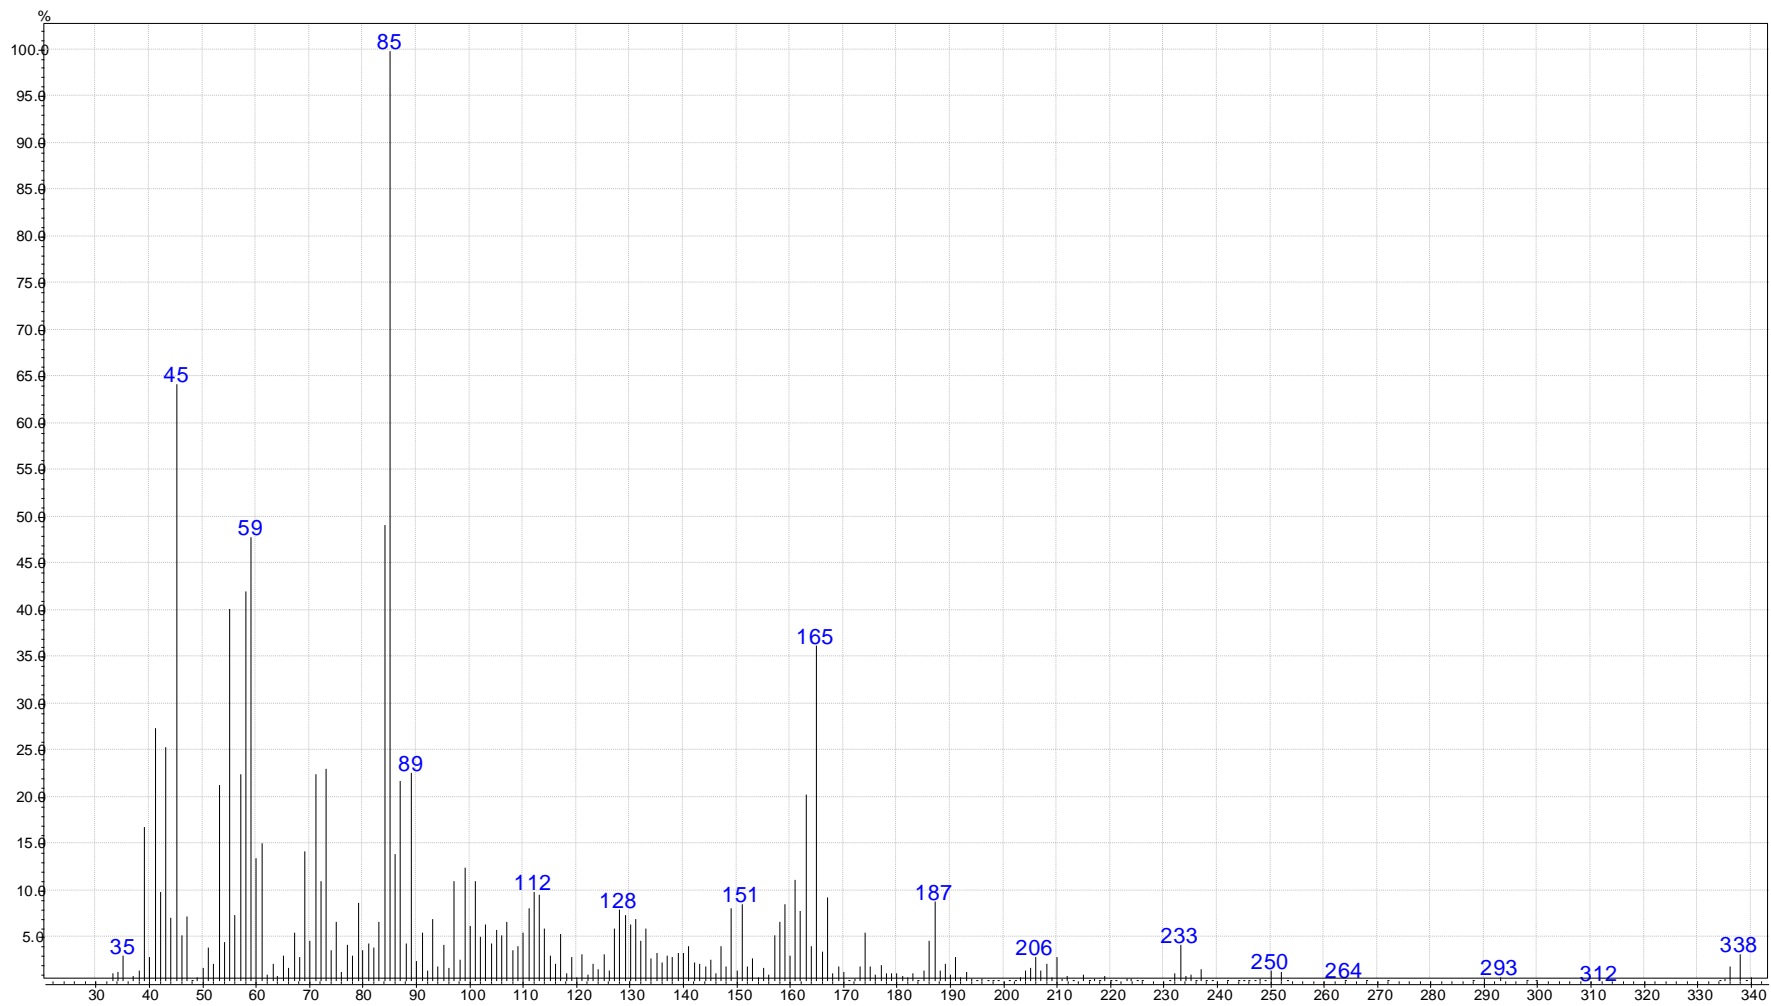

Mass-spectrum of diethyl 2-[(Z)-2-(vinylsulfanyl)ethenyl]selanyl succinate (6b)
